# Supplementary material for: Vesuvianite: a new mineral species of (U–Th)/He geochronology
Source: Royal Society of Chemistry journal article supplement (doi:10.1039/d4ja00127c), 2024-01-01
Supplement: d4ja00127c2.xlsx [file d4ja00127c2.xlsx]

## Sheet: Table S1
				Supplementary Table 1 (U-Th)/He ages of FCT zircon
				Sample	238U (mol)	±s (mol)	232Th(mol)	±s (mol)	4He(mol)	±s (mol)	AgeRaw(Ma)	±s (Ma)	FT	AgeCor(Ma)	±s (Ma)	Th/U	mass(μg)	Rs(μm)	U (ppm)	Th (ppm)	eU(ppm)
				FCT-1	5.66748e-12	8.09848e-14	2.90672e-12	3.3357e-14	1.68948e-13	2.03912e-15	20.75	0.36	0.766	27.0888	1.43366	0.512876	4.1	48.7	331.433	164.505	370.092
				FCT-2	1.1066e-11	1.7387e-13	5.81065e-12	5.78763e-14	3.64671e-13	4.46011e-15	22.88	0.43	0.784	29.1837	1.55886	0.525091	5.15	52.8	515.196	261.804	576.72
				FCT-3	3.84288e-12	5.43061e-14	1.9512e-12	3.07714e-14	1.12994e-13	1.33461e-15	20.49	0.36	0.732	27.9918	1.48348	0.507743	2.82	42	326.736	160.55	364.465
				FCT-4	5.89088e-12	8.71833e-14	3.36176e-12	4.18845e-14	2.19097e-13	2.64835e-15	25.57	0.46	0.756	33.8228	1.79727	0.570672	3.3	46.5	428.012	236.381	483.561
				FCT-5	3.67973e-12	6.21158e-14	1.95895e-12	2.39839e-14	1.04062e-13	1.30943e-15	19.61	0.38	0.696	28.1753	1.51086	0.532363	1.69	36.5	522.058	268.965	585.265
				FCT-6	7.20173e-12	1.06046e-13	4.39015e-12	6.22645e-14	2.46388e-13	2.82076e-15	23.34	0.4	0.784	29.7704	1.57353	0.609597	5.98	53	288.752	170.348	328.8
				FCT-7	3.99723e-12	7.6317e-14	2.07199e-12	3.2281e-14	1.20501e-13	1.38582e-15	20.96	0.43	0.723	28.9903	1.56679	0.518357	2.46	40.5	389.595	195.439	435.523
				FCT-8	3.77079e-12	7.02444e-14	1.98057e-12	3.45484e-14	1.08601e-13	1.30182e-15	20	0.41	0.735	27.2109	1.47046	0.52524	2.45	42.5	369.025	187.579	413.106
				FCT-9	6.68703e-12	1.2939e-13	3.40444e-12	5.97059e-14	2.34561e-13	2.79548e-15	24.43	0.51	0.778	31.401	1.7014	0.50911	4.07	51.5	393.939	194.093	439.551
				FCT-10	1.27544e-11	2.38315e-13	6.98949e-12	1.41363e-13	5.40548e-13	6.22209e-15	29.27	0.59	0.817	35.8262	1.9314	0.548004	8.76	62.9	349.098	185.14	392.6
				FCT-11	8.47488e-12	1.55249e-13	4.30464e-12	8.67223e-14	2.7888e-13	3.19241e-15	22.93	0.46	0.784	29.2474	1.57569	0.50793	4.73	52.8	429.598	211.172	479.2
				FCT-12	7.88279e-12	1.48498e-13	4.05711e-12	5.80202e-14	3.14286e-13	3.86693e-15	27.73	0.58	0.794	34.9244	1.89285	0.51468	6.21	55.4	304.353	151.595	340
				Note:
				a：(U-Th)/He dating of vesuvianite particles was done in two batches.The FCT zircons in the table are standard samples from two batches of experiments
