# Supplementary material for: Vesuvianite: a new mineral species of (U–Th)/He geochronology
Source: Royal Society of Chemistry journal article supplement (doi:10.1039/d4ja00127c), 2024-01-01
Supplement: d4ja00127c3.xlsx [file d4ja00127c3.xlsx]

## Sheet: Supplementary table 2
	Supplementary Table 2: Raman spectra results of reference and seven samples
	Reference		M6635-1		M6635-2		M784-1		M784-2		M1377-1		M1377-2		M6608-1		M6608-2		M1439-1		M1439-2		Bufa-1		Bufa-2		Wilui-1		Wilui-2
	Raman shift(cm-1)	Intensity(a.u.)	Raman shift(cm-1)	Intensity(a.u.)	Raman shift(cm-1)	Intensity(a.u.)	Raman shift(cm-1)	Intensity(a.u.)	Raman shift(cm-1)	Intensity(a.u.)	Raman shift(cm-1)	Intensity(a.u.)	Raman shift(cm-1)	Intensity(a.u.)	Raman shift(cm-1)	Intensity(a.u.)	Raman shift(cm-1)	Intensity(a.u.)	Raman shift(cm-1)	Intensity(a.u.)	Raman shift(cm-1)	Intensity(a.u.)	Raman shift(cm-1)	Intensity(a.u.)	Raman shift(cm-1)	Intensity(a.u.)	Raman shift(cm-1)	Intensity(a.u.)	Raman shift(cm-1)	Intensity(a.u.)
	300.082	110.855	300.707	77.213	300.707	30.5274	300.707	152.846	300.707	118.503	300.707	171.328	300.707	139.145	300.707	23.9611	300.707	29.2969	300.707	38.5844	300.707	35.7408	300.707	243.962	300.707	161.946	300.707	92.1146	300.707	188.082
	300.564	99.5646	301.659	75.7068	301.659	31.1115	301.659	155.509	301.659	119.239	301.659	173.481	301.659	139.547	301.659	19.0571	301.659	24.6827	301.659	35.923	301.659	33.2441	301.659	237.374	301.659	159.954	301.659	95.4456	301.659	188.869
	301.046	89.407	302.61	74.3129	302.61	31.8373	302.61	158.377	302.61	119.931	302.61	175.866	302.61	140.055	302.61	14.4776	302.61	19.9714	302.61	33.0579	302.61	30.5732	302.61	230.483	302.61	157.759	302.61	98.6391	302.61	189.395
	301.529	80.3823	303.561	73.0482	303.561	32.7304	303.561	161.402	303.561	120.574	303.561	178.44	303.561	140.666	303.561	10.401	303.561	14.9975	303.561	30.0017	303.561	27.7483	303.561	223.376	303.561	155.534	303.561	101.683	303.561	189.642
	302.011	72.4907	304.512	71.9454	304.512	33.794	304.512	164.625	304.512	121.175	304.512	181.26	304.512	141.4	304.512	6.87859	304.512	9.87232	304.512	26.7111	304.512	24.7597	304.512	216.141	304.512	153.282	304.512	104.582	304.512	189.606
	302.493	65.7321	305.463	71.0455	305.463	35.0337	305.463	168.052	305.463	121.783	305.463	184.306	305.463	142.277	305.463	3.89448	305.463	5.78038	305.463	23.3311	305.463	21.6294	305.463	208.808	305.463	151.049	305.463	107.335	305.463	189.281
	302.975	60.1065	306.415	70.4482	306.415	36.4516	306.415	171.681	306.415	122.429	306.415	187.606	306.415	143.306	306.415	1.48553	306.415	2.88528	306.415	19.9406	306.415	18.448	306.415	201.51	306.415	148.893	306.415	109.94	306.415	188.675
	303.457	55.6139	307.366	70.2636	307.366	38.0477	307.366	175.508	307.366	123.132	307.366	191.207	307.366	144.494	307.366	-0.24763	307.366	0.90925	307.366	16.6012	307.366	15.3219	307.366	194.415	307.366	146.888	307.366	112.398	307.366	187.804
	303.939	52.2543	308.317	70.5531	308.317	39.8236	308.317	179.538	308.317	123.892	308.317	195.109	308.317	145.866	308.317	-1.30648	308.317	-0.07759	308.317	13.3805	308.317	12.3183	308.317	187.539	308.317	145.222	308.317	114.723	308.317	186.676
	304.421	50.0276	309.268	71.4095	309.268	41.778	309.268	183.713	309.268	124.745	309.268	199.295	309.268	147.428	309.268	-1.67918	309.268	0.60835	309.268	10.3406	309.268	9.50466	309.268	181.042	309.268	143.989	309.268	116.92	309.268	185.291
	304.904	48.934	310.22	72.8603	310.22	43.8927	310.22	187.995	310.22	125.686	310.22	203.753	310.22	149.161	310.22	-1.35992	310.22	2.04679	310.22	7.53673	310.22	6.91736	310.22	175.037	310.22	143.215	310.22	118.98	310.22	183.653
	305.386	48.9734	311.171	74.9569	311.171	46.1526	311.171	192.342	311.171	126.709	311.171	208.453	311.171	151.038	311.171	-0.35465	311.171	2.69789	311.171	5.02242	311.171	4.59228	311.171	169.621	311.171	142.916	311.171	120.904	311.171	181.782
	305.868	50.1459	312.122	77.8414	312.122	48.5581	312.122	196.698	312.122	127.832	312.122	213.303	312.122	153.024	312.122	1.66722	312.122	4.68627	312.122	2.85197	312.122	2.57923	312.122	164.868	312.122	143.21	312.122	122.799	312.122	179.704
	306.35	52.4513	313.073	81.4068	313.073	51.0438	313.073	200.996	313.073	128.972	313.073	218.162	313.073	155.07	313.073	4.60131	313.073	6.81349	313.073	1.08214	313.073	0.94379	313.073	160.952	313.073	144.054	313.073	124.35	313.073	177.451
	306.832	55.8897	314.024	85.4434	314.024	53.5631	314.024	205.182	314.024	130.055	314.024	222.875	314.024	157.135	314.024	8.30906	314.024	9.45681	314.024	-0.22822	314.024	-0.30526	314.024	157.893	314.024	145.333	314.024	125.522	314.024	175.054
	307.314	60.4611	314.976	89.7667	314.976	56.0664	314.976	209.211	314.976	130.994	314.976	227.312	314.976	159.176	314.976	12.6229	314.976	12.9803	314.976	-0.36136	314.976	-1.1726	314.976	155.66	314.976	146.952	314.976	126.404	314.976	172.542
	307.796	66.1655	315.927	94.2663	315.927	58.495	315.927	213.04	315.927	131.667	315.927	231.38	315.927	161.141	315.927	17.2004	315.927	17.1389	315.927	-0.06937	315.927	-1.67218	315.927	154.169	315.927	148.854	315.927	127.041	315.927	169.933
	308.278	73.003	316.878	98.458	316.878	60.7948	316.878	216.597	316.878	132.274	316.878	234.874	316.878	163.002	316.878	21.9391	316.878	21.5616	316.878	0.64238	316.878	-1.81476	316.878	153.127	316.878	150.899	316.878	127.461	316.878	167.265
	308.76	80.9735	317.829	102.314	317.829	62.9227	317.829	219.833	317.829	132.807	317.829	237.846	317.829	164.726	317.829	26.8442	317.829	26.0301	317.829	1.74274	317.829	-1.60332	317.829	152.587	317.829	152.991	317.829	127.652	317.829	164.573
	309.243	90.0769	318.78	105.787	318.78	64.8415	318.78	222.707	318.78	133.255	318.78	240.334	318.78	166.287	318.78	31.9388	318.78	30.3929	318.78	3.19335	318.78	-1.072	318.78	152.55	318.78	155.025	318.78	127.64	318.78	161.891
	309.725	100.313	319.732	108.792	319.732	66.5216	319.732	225.185	319.732	133.612	319.732	242.309	319.732	167.678	319.732	37.3728	319.732	34.4714	319.732	4.95754	319.732	-0.27599	319.732	152.949	319.732	156.932	319.732	127.508	319.732	159.259
	310.207	111.683	320.683	111.282	320.683	67.9366	320.683	227.227	320.683	133.867	320.683	243.798	320.683	168.865	320.683	42.6223	320.683	38.3276	320.683	7.04324	320.683	0.69251	320.683	153.867	320.683	158.695	320.683	127.234	320.683	156.751
	310.689	124.185	321.634	113.337	321.634	69.0711	321.634	228.813	321.634	134.023	321.634	244.953	321.634	169.845	321.634	47.7275	321.634	41.9663	321.634	9.31169	321.634	1.83974	321.634	155.261	321.634	160.292	321.634	126.837	321.634	154.391
	311.171	137.821	322.585	115.006	322.585	69.9114	322.585	229.933	322.585	134.088	322.585	245.808	322.585	170.612	322.585	52.3375	322.585	45.3356	322.585	11.7113	322.585	3.15827	322.585	157.105	322.585	161.689	322.585	126.323	322.585	152.207
	311.653	152.589	323.537	116.309	323.537	70.4462	323.537	230.591	323.537	134.078	323.537	246.303	323.537	171.16	323.537	55.2102	323.537	48.254	323.537	14.2509	323.537	4.63018	323.537	159.386	323.537	162.848	323.537	125.691	323.537	150.234
	312.135	168.491	324.488	117.161	324.488	70.6737	324.488	230.776	324.488	134.023	324.488	246.383	324.488	171.499	324.488	58.8651	324.488	51.1456	324.488	16.9003	324.488	6.22083	324.488	162.053	324.488	163.759	324.488	125.024	324.488	148.492
	312.617	190.819	325.439	117.571	325.439	70.6024	325.439	230.494	325.439	133.923	325.439	246.078	325.439	171.64	325.439	63.1609	325.439	54.0349	325.439	19.6306	325.439	7.89603	325.439	165.079	325.439	164.398	325.439	124.322	325.439	147.049
	313.099	214.239	326.39	117.543	326.39	70.2428	326.39	229.756	326.39	133.784	326.39	245.396	326.39	171.596	326.39	67.9322	326.39	56.7815	326.39	22.4127	326.39	9.62984	326.39	168.464	326.39	164.747	326.39	123.645	326.39	145.954
	313.582	238.466	327.341	117.077	327.341	69.6081	327.341	228.583	327.341	133.616	327.341	244.373	327.341	171.381	327.341	72.9074	327.341	59.1155	327.341	25.2162	327.341	11.3986	327.341	172.229	327.341	164.799	327.341	123.065	327.341	145.242
	314.064	263.549	328.293	116.137	328.293	68.7173	328.293	227.025	328.293	133.45	328.293	243.195	328.293	170.986	328.293	75.5018	328.293	61.6133	328.293	28.0112	328.293	13.1703	328.293	176.415	328.293	164.571	328.293	122.626	328.293	144.925
	314.546	289.609	329.244	114.767	329.244	67.5928	329.244	225.118	329.244	133.312	329.244	241.802	329.244	170.445	329.244	77.3621	329.244	63.8629	329.244	30.7431	329.244	14.9588	329.244	181.001	329.244	164.158	329.244	122.356	329.244	144.967
	315.028	316.767	330.195	112.992	330.195	66.2559	330.195	222.898	330.195	133.237	330.195	240.18	330.195	169.786	330.195	78.5413	330.195	65.8302	330.195	33.3837	330.195	16.7262	330.195	185.887	330.195	163.584	330.195	122.187	330.195	145.382
	315.51	344.644	331.146	110.778	331.146	64.7285	331.146	220.395	331.146	133.26	331.146	238.334	331.146	169.029	331.146	79.0264	331.146	67.4929	331.146	35.9162	331.146	18.4319	331.146	190.977	331.146	162.842	331.146	122.05	331.146	146.186
	315.992	373.045	332.098	107.975	332.098	63.0334	332.098	217.624	332.098	133.412	332.098	236.291	332.098	168.18	332.098	79.053	332.098	68.1323	332.098	38.3324	332.098	20.06	332.098	196.226	332.098	161.884	332.098	121.921	332.098	147.354
	316.474	401.983	333.049	104.341	333.049	61.1943	333.049	214.641	333.049	133.684	333.049	233.988	333.049	167.269	333.049	78.4852	333.049	68.1938	333.049	40.6205	333.049	21.6786	333.049	201.36	333.049	160.755	333.049	121.786	333.049	148.87
	316.956	431.109	334	100.092	334	59.235	334	211.477	334	134.087	334	231.427	334	166.308	334	77.3405	334	67.8189	334	42.8124	334	23.258	334	206.497	334	159.424	334	121.627	334	150.692
	317.438	459.479	334.951	95.7186	334.951	57.1808	334.951	208.171	334.951	134.627	334.951	228.618	334.951	165.312	334.951	75.6605	334.951	67.1754	334.951	44.93	334.951	24.761	334.951	211.729	334.951	157.867	334.951	121.429	334.951	152.793
	317.921	487.11	335.902	91.9342	335.902	55.0594	335.902	204.781	335.902	135.306	335.902	225.576	335.902	164.306	335.902	73.6279	335.902	66.8182	335.902	46.9607	335.902	26.1694	335.902	217.074	335.902	156.078	335.902	121.175	335.902	155.17
	318.403	514.749	336.854	89.285	336.854	52.9079	336.854	201.359	336.854	136.128	336.854	222.354	336.854	163.305	336.854	71.4054	336.854	66.5623	336.854	48.9238	336.854	27.5147	336.854	222.369	336.854	154.089	336.854	120.84	336.854	157.809
	318.885	543.765	337.805	88.207	337.805	50.7577	337.805	197.932	337.805	137.083	337.805	219.002	337.805	162.331	337.805	69.223	337.805	66.2564	337.805	50.8355	337.805	28.7766	337.805	227.699	337.805	151.916	337.805	120.424	337.805	160.694
	319.367	573.167	338.756	88.6382	338.756	48.638	338.756	194.542	338.756	138.171	338.756	215.587	338.756	161.405	338.756	67.289	338.756	65.9632	338.756	52.7305	338.756	29.9772	338.756	233.118	338.756	149.577	338.756	119.881	338.756	163.815
	319.849	601.839	339.707	90.2771	339.707	46.5768	339.707	191.24	339.707	139.397	339.707	212.193	339.707	160.548	339.707	66.0418	339.707	66.0609	339.707	54.6502	339.707	31.1639	339.707	238.657	339.707	147.106	339.707	119.139	339.707	167.166
	320.331	629.19	340.659	93.1065	340.659	44.5983	340.659	188.056	340.659	140.77	340.659	209.005	340.659	159.784	340.659	65.2775	340.659	66.5578	340.659	56.5647	340.659	32.3315	340.659	244.305	340.659	144.554	340.659	118.403	340.659	170.772
	320.813	655.659	341.61	96.8378	341.61	42.7251	341.61	185.019	341.61	142.297	341.61	206.006	341.61	159.158	341.61	66.4907	341.61	67.0858	341.61	58.4733	341.61	33.5255	341.61	250.142	341.61	141.963	341.61	117.746	341.61	174.599
	321.295	681.529	342.561	101.253	342.561	40.9729	342.561	182.167	342.561	143.978	342.561	203.212	342.561	158.703	342.561	68.6696	342.561	67.6619	342.561	60.4106	342.561	34.7788	342.561	256.23	342.561	139.37	342.561	117.227	342.561	178.636
	321.778	706.971	343.512	106.256	343.512	39.3536	343.512	179.535	343.512	145.811	343.512	200.669	343.512	158.448	343.512	69.6273	343.512	68.4151	343.512	62.4073	343.512	36.1155	343.512	262.629	343.512	136.813	343.512	116.883	343.512	182.888
	322.26	732.501	344.463	111.869	344.463	37.8763	344.463	177.129	344.463	147.791	344.463	198.465	344.463	158.422	344.463	70.7063	344.463	69.2472	344.463	64.4584	344.463	37.5462	344.463	269.419	344.463	134.324	344.463	116.717	344.463	187.381
	322.742	759.527	345.415	117.983	345.415	36.5584	345.415	174.964	345.415	149.909	345.415	196.621	345.415	158.624	345.415	72.2544	345.415	70.0785	345.415	66.574	345.415	39.1191	345.415	276.667	345.415	131.942	345.415	116.732	345.415	192.139
	323.224	787.563	346.366	124.499	346.366	35.4109	346.366	173.062	346.366	152.154	346.366	195.142	346.366	159.06	346.366	74.5611	346.366	70.927	346.366	68.7914	346.366	40.8679	346.366	284.593	346.366	129.697	346.366	116.937	346.366	197.126
	323.706	815.056	347.317	131.26	347.317	34.4408	347.317	171.444	347.317	154.516	347.317	194.004	347.317	159.739	347.317	77.796	347.317	71.8319	347.317	71.1874	347.317	42.8199	347.317	293.285	347.317	127.621	347.317	117.343	347.317	202.306
	324.188	839.629	348.268	137.964	348.268	33.6496	348.268	170.123	348.268	156.979	348.268	193.112	348.268	160.665	348.268	80.7292	348.268	73.1494	348.268	73.8769	348.268	45.0013	348.268	302.643	348.268	125.751	348.268	117.954	348.268	207.662
	324.67	860.889	349.22	144.626	349.22	33.0417	349.22	169.096	349.22	159.527	349.22	192.575	349.22	161.843	349.22	83.285	349.22	74.3947	349.22	76.9865	349.22	47.4431	349.22	312.856	349.22	124.137	349.22	118.777	349.22	213.206
	325.152	879.4	350.171	151.163	350.171	32.5983	350.171	168.353	350.171	162.141	350.171	192.369	350.171	163.254	350.171	85.5652	350.171	75.6303	350.171	80.51	350.171	50.2431	350.171	324.056	350.171	122.806	350.171	119.814	350.171	218.904
	325.635	896.489	351.122	157.585	351.122	32.2939	351.122	167.897	351.122	164.824	351.122	192.473	351.122	164.873	351.122	87.6724	351.122	76.9309	351.122	84.5376	351.122	53.4872	351.122	336.244	351.122	121.764	351.122	121.069	351.122	224.71
	326.117	913.013	352.073	163.934	352.073	32.0934	352.073	167.731	352.073	167.581	352.073	192.912	352.073	166.685	352.073	89.8601	352.073	78.5192	352.073	89.1936	352.073	57.2411	352.073	349.342	352.073	120.973	352.073	122.543	352.073	230.582
	326.599	929.568	353.024	170.128	353.024	31.9787	353.024	167.831	353.024	170.398	353.024	193.614	353.024	168.675	353.024	92.1454	353.024	79.9527	353.024	94.4856	353.024	61.5596	353.024	363.318	353.024	120.529	353.024	124.23	353.024	236.483
	327.081	945.676	353.976	176.154	353.976	31.9293	353.976	168.164	353.976	173.25	353.976	194.558	353.976	170.82	353.976	94.7048	353.976	81.4255	353.976	100.35	353.976	66.4512	353.976	378.093	353.976	120.46	353.976	126.109	353.976	242.352
	327.563	960.903	354.927	181.941	354.927	31.9207	354.927	168.705	354.927	176.105	354.927	195.714	354.927	173.082	354.927	97.6207	354.927	82.9136	354.927	106.756	354.927	71.9212	354.927	393.54	354.927	120.79	354.927	128.15	354.927	248.119
	328.045	974.791	355.878	187.414	355.878	31.9277	355.878	169.421	355.878	178.927	355.878	197.028	355.878	175.412	355.878	100.983	355.878	84.2415	355.878	113.668	355.878	77.9236	355.878	409.49	355.878	121.524	355.878	130.319	355.878	253.711
	328.527	987.312	356.829	192.525	356.829	31.9202	356.829	170.276	356.829	181.69	356.829	198.458	356.829	177.747	356.829	104.881	356.829	85.9109	356.829	121.019	356.829	84.2949	356.829	425.837	356.829	122.497	356.829	132.56	356.829	259.046
	329.009	998.81	357.78	197.176	357.78	31.8801	357.78	171.247	357.78	184.351	357.78	199.903	357.78	180.028	357.78	109.319	357.78	88.1763	357.78	128.676	357.78	90.9224	357.78	442.357	357.78	123.623	357.78	134.815	357.78	264.078
	329.491	1010.18	358.732	201.236	358.732	31.7779	358.732	172.272	358.732	186.868	358.732	201.24	358.732	182.2	358.732	114.252	358.732	91.0532	358.732	136.525	358.732	97.7032	358.732	458.892	358.732	124.839	358.732	137.031	358.732	268.747
	329.974	1021.12	359.683	204.599	359.683	31.5825	359.683	173.303	359.683	189.197	359.683	202.358	359.683	184.212	359.683	119.613	359.683	94.5342	359.683	144.453	359.683	104.528	359.683	475.258	359.683	126.096	359.683	139.14	359.683	272.995
	330.456	1030	360.634	207.189	360.634	31.2685	360.634	174.344	360.634	191.284	360.634	203.189	360.634	186.025	360.634	125.972	360.634	100.312	360.634	152.349	360.634	111.282	360.634	491.23	360.634	127.269	360.634	140.935	360.634	276.781
	330.938	1036.4	361.585	208.967	361.585	30.8016	361.585	175.328	361.585	193.032	361.585	203.664	361.585	187.595	361.585	133.963	361.585	106.052	361.585	160.165	361.585	117.887	361.585	506.376	361.585	128.325	361.585	142.663	361.585	280.069
	331.42	1041.62	362.537	209.955	362.537	30.1599	362.537	176.187	362.537	194.412	362.537	203.817	362.537	188.888	362.537	143.793	362.537	112.502	362.537	167.709	362.537	124.259	362.537	520.581	362.537	129.228	362.537	144.365	362.537	282.79
	331.902	1048.75	363.488	210.174	363.488	29.3247	363.488	176.934	363.488	195.407	363.488	203.685	363.488	189.874	363.488	155.124	363.488	120.047	363.488	174.928	363.488	130.327	363.488	533.706	363.488	129.945	363.488	145.999	363.488	284.928
	332.384	1057.77	364.439	209.638	364.439	28.2873	364.439	177.596	364.439	196.015	364.439	203.299	364.439	190.537	364.439	164.928	364.439	128.113	364.439	181.823	364.439	136.03	364.439	545.603	364.439	130.466	364.439	147.518	364.439	286.496
	332.866	1067.48	365.39	208.289	365.39	27.041	365.39	178.036	365.39	196.239	365.39	202.749	365.39	190.892	365.39	174.977	365.39	137.435	365.39	188.33	365.39	141.303	365.39	556.107	365.39	130.756	365.39	148.899	365.39	287.496
	333.348	1076.6	366.341	206.113	366.341	25.5954	366.341	178.254	366.341	196.083	366.341	201.981	366.341	190.953	366.341	185.337	366.341	146.859	366.341	194.469	366.341	146.11	366.341	565.297	366.341	130.923	366.341	150.163	366.341	287.913
	333.83	1085.31	367.293	203.199	367.293	23.9652	367.293	178.27	367.293	195.562	367.293	200.97	367.293	190.741	367.293	196.115	367.293	156.453	367.293	200.103	367.293	150.414	367.293	573.068	367.293	130.999	367.293	151.303	367.293	287.74
	334.313	1093.78	368.244	199.625	368.244	22.1696	368.244	178.113	368.244	194.687	368.244	199.761	368.244	190.259	368.244	207.56	368.244	167.449	368.244	205.081	368.244	154.172	368.244	579.319	368.244	130.909	368.244	152.247	368.244	286.968
	334.795	1101.97	369.195	195.362	369.195	20.2367	369.195	177.818	369.195	193.466	369.195	198.393	369.195	189.509	369.195	220.551	369.195	178.331	369.195	209.333	369.195	157.33	369.195	583.934	369.195	130.656	369.195	153.024	369.195	285.562
	335.277	1109.9	370.146	190.404	370.146	18.1898	370.146	177.429	370.146	191.989	370.146	196.91	370.146	188.497	370.146	233.819	370.146	189.01	370.146	212.923	370.146	159.857	370.146	586.816	370.146	130.207	370.146	153.63	370.146	283.515
	335.759	1117.92	371.098	184.782	371.098	16.0672	371.098	177.004	371.098	190.298	371.098	195.365	371.098	187.252	371.098	246.681	371.098	199.433	371.098	215.826	371.098	161.72	371.098	587.914	371.098	129.613	371.098	154.091	371.098	280.849
	336.241	1126.18	372.049	178.558	372.049	13.914	372.049	176.597	372.049	188.428	372.049	193.806	372.049	185.814	372.049	258.444	372.049	209.548	372.049	218.016	372.049	162.884	372.049	587.192	372.049	128.871	372.049	154.452	372.049	277.589
	336.723	1134.65	373	171.837	373	11.7812	373	176.275	373	186.425	373	192.241	373	184.227	373	268.772	373	217.671	373	219.476	373	163.341	373	584.62	373	127.94	373	154.665	373	273.78
	337.205	1143.02	373.951	164.726	373.951	9.71604	373.951	176.125	373.951	184.341	373.951	190.823	373.951	182.544	373.951	277.521	373.951	223.695	373.951	220.174	373.951	163.092	373.951	580.178	373.951	126.84	373.951	154.778	373.951	269.437
	337.687	1151.01	374.902	157.352	374.902	7.77483	374.902	176.161	374.902	182.232	374.902	189.579	374.902	180.818	374.902	286.612	374.902	227.015	374.902	220.138	374.902	162.095	374.902	573.866	374.902	125.549	374.902	154.783	374.902	264.578
	338.17	1158.89	375.854	149.855	375.854	6.00618	375.854	176.443	375.854	180.162	375.854	188.609	375.854	179.105	375.854	295.634	375.854	227.38	375.854	219.396	375.854	160.355	375.854	565.687	375.854	124.088	375.854	154.64	375.854	259.243
	338.652	1167.23	376.805	142.443	376.805	4.44755	376.805	177.041	376.805	178.182	376.805	187.99	376.805	177.485	376.805	291.437	376.805	225.44	376.805	217.975	376.805	157.897	376.805	555.579	376.805	122.485	376.805	154.315	376.805	253.469
	339.134	1176.29	377.756	135.284	377.756	3.13164	377.756	177.987	377.756	176.307	377.756	187.789	377.756	176.001	377.756	278.357	377.756	221.529	377.756	215.844	377.756	154.732	377.756	543.593	377.756	120.684	377.756	153.767	377.756	247.312
	339.616	1185.56	378.707	128.522	378.707	2.11049	378.707	179.305	378.707	174.615	378.707	188.063	378.707	174.716	378.707	263.58	378.707	215.588	378.707	213.072	378.707	150.865	378.707	529.871	378.707	118.912	378.707	153.051	378.707	240.831
	340.098	1194.43	379.659	122.448	379.659	1.42204	379.659	181.042	379.659	173.112	379.659	188.845	379.659	173.676	379.659	249.101	379.659	207.098	379.659	209.616	379.659	146.302	379.659	514.461	379.659	117.263	379.659	152.23	379.659	234.067
	340.58	1202.88	380.61	117.556	380.61	1.09796	380.61	183.24	380.61	171.791	380.61	190.146	380.61	172.924	380.61	234.095	380.61	194.647	380.61	205.451	380.61	141.062	380.61	497.433	380.61	115.808	380.61	151.327	380.61	227.079
	341.062	1211.76	381.561	114.554	381.561	1.17198	381.561	185.898	381.561	170.683	381.561	191.965	381.561	172.498	381.561	218.828	381.561	184.374	381.561	200.622	381.561	135.205	381.561	479.211	381.561	114.582	381.561	150.362	381.561	219.92
	341.544	1222.64	382.512	113.771	382.512	1.68347	382.512	188.966	382.512	169.809	382.512	194.305	382.512	172.373	382.512	203.883	382.512	173.765	382.512	195.226	382.512	128.775	382.512	459.875	382.512	113.681	382.512	149.364	382.512	212.706
	342.026	1236.35	383.463	115.233	383.463	2.65137	383.463	192.402	383.463	169.183	383.463	197.169	383.463	172.617	383.463	190.976	383.463	162.941	383.463	189.345	383.463	121.863	383.463	439.533	383.463	113.182	383.463	148.366	383.463	205.53
	342.509	1251.8	384.415	118.535	384.415	5.67502	384.415	196.172	384.415	168.819	384.415	200.559	384.415	173.271	384.415	182.068	384.415	152.439	384.415	183.064	384.415	114.578	384.415	418.383	384.415	113.158	384.415	147.402	384.415	198.465
	342.991	1267.46	385.366	123.217	385.366	10.2293	385.366	200.237	385.366	168.729	385.366	204.481	385.366	174.366	385.366	172.135	385.366	142.971	385.366	176.456	385.366	106.986	385.366	396.864	385.366	113.671	385.366	146.523	385.366	191.593
	343.473	1281.56	386.317	128.658	386.317	15.2489	386.317	204.563	386.317	168.951	386.317	208.898	386.317	175.981	386.317	163.097	386.317	135.224	386.317	169.612	386.317	99.2141	386.317	375.139	386.317	114.761	386.317	145.767	386.317	185.007
	343.955	1294.82	387.268	134.639	387.268	20.7212	387.268	209.099	387.268	169.489	387.268	213.751	387.268	178.094	387.268	154.916	387.268	128.433	387.268	162.617	387.268	91.3704	387.268	353.459	387.268	116.688	387.268	145.204	387.268	178.765
	344.437	1308.31	388.22	141.214	388.22	26.6249	388.22	213.786	388.22	170.332	388.22	218.981	388.22	180.727	388.22	147.587	388.22	122.652	388.22	155.549	388.22	83.5468	388.22	332.076	388.22	119.443	388.22	144.905	388.22	172.927
	344.919	1322.91	389.171	148.154	389.171	32.9299	389.171	218.575	389.171	171.454	389.171	224.528	389.171	183.887	389.171	141.374	389.171	121.42	389.171	148.544	389.171	75.8775	389.171	311.31	389.171	122.972	389.171	144.822	389.171	167.526
	345.401	1338.45	390.122	155.393	390.122	39.5996	390.122	223.405	390.122	172.819	390.122	230.333	390.122	187.504	390.122	136.18	390.122	118.119	390.122	141.734	390.122	68.4727	390.122	291.44	390.122	127.308	390.122	144.925	390.122	162.636
	345.883	1354.96	391.073	162.994	391.073	46.5939	391.073	228.218	391.073	174.398	391.073	236.365	391.073	191.543	391.073	131.828	391.073	114.736	391.073	135.221	391.073	61.4004	391.073	272.675	391.073	132.447	391.073	145.174	391.073	158.284
	346.365	1372.48	392.024	170.943	392.024	53.8578	392.024	232.953	392.024	176.156	392.024	242.545	392.024	195.965	392.024	128.299	392.024	111.859	392.024	129.115	392.024	54.8051	392.024	255.334	392.024	138.355	392.024	145.535	392.024	154.492
	346.848	1390.7	392.976	179.03	392.976	61.3299	392.976	237.55	392.976	178.059	392.976	248.805	392.976	200.703	392.976	125.649	392.976	109.596	392.976	123.589	392.976	48.8612	392.976	239.598	392.976	145.013	392.976	145.995	392.976	151.227
	347.33	1408.67	393.927	187.169	393.927	68.9361	393.927	241.947	393.927	180.071	393.927	255.085	393.927	205.694	393.927	124.118	393.927	107.814	393.927	118.824	393.927	43.7043	393.927	225.533	393.927	152.417	393.927	146.546	393.927	148.44
	347.812	1427.4	394.878	195.256	394.878	76.5921	394.878	246.083	394.878	182.147	394.878	261.302	394.878	210.851	394.878	123.338	394.878	106.318	394.878	114.984	394.878	39.3795	394.878	213.091	394.878	160.492	394.878	147.169	394.878	146.121
	348.294	1447.59	395.829	203.204	395.829	84.2283	395.829	249.89	395.829	184.236	395.829	267.349	395.829	216.096	395.829	123.345	395.829	105.431	395.829	112.22	395.829	35.9532	395.829	202.283	395.829	169.147	395.829	147.837	395.829	144.271
	348.776	1469.15	396.78	210.967	396.78	91.769	396.78	253.295	396.78	186.287	396.78	273.153	396.78	221.343	396.78	124.167	396.78	105.451	396.78	110.503	396.78	33.4972	396.78	193.284	396.78	178.26	396.78	148.522	396.78	142.873
	349.258	1491.25	397.732	218.46	397.732	99.122	397.732	256.249	397.732	188.252	397.732	278.663	397.732	226.518	397.732	125.848	397.732	105.751	397.732	109.704	397.732	32.0564	397.732	185.949	397.732	187.71	397.732	149.195	397.732	141.877
	349.74	1514.91	398.683	225.648	398.683	106.212	398.683	258.685	398.683	190.085	398.683	283.787	398.683	231.533	398.683	128.423	398.683	107.068	398.683	109.811	398.683	31.5334	398.683	180.083	398.683	197.377	398.683	149.825	398.683	141.247
	350.223	1541.75	399.634	232.402	399.634	112.958	399.634	260.594	399.634	191.713	399.634	288.424	399.634	236.309	399.634	131.736	399.634	108.539	399.634	110.699	399.634	31.7825	399.634	175.544	399.634	207.121	399.634	150.379	399.634	140.9
	350.705	1571.59	400.585	238.535	400.585	119.285	400.585	261.93	400.585	193.05	400.585	292.466	400.585	240.754	400.585	135.774	400.585	110.23	400.585	112.163	400.585	32.6681	400.585	172.217	400.585	216.806	400.585	150.825	400.585	140.774
	351.187	1602.71	401.537	243.963	401.537	125.117	401.537	262.644	401.537	194.028	401.537	295.843	401.537	244.769	401.537	140.847	401.537	114.233	401.537	114.069	401.537	34.043	401.537	169.9	401.537	226.238	401.537	151.13	401.537	140.799
	351.669	1633.62	402.488	248.529	402.488	130.385	402.488	262.704	402.488	194.582	402.488	298.493	402.488	248.283	402.488	146.767	402.488	118.03	402.488	116.334	402.488	35.741	402.488	168.412	402.488	235.181	402.488	151.261	402.488	140.924
	352.151	1664.76	403.439	252.185	403.439	135.016	403.439	262.039	403.439	194.651	403.439	300.317	403.439	251.177	403.439	153.176	403.439	122.954	403.439	118.715	403.439	37.5455	403.439	167.566	403.439	243.592	403.439	151.192	403.439	141.109
	352.633	1696.93	404.39	254.836	404.39	138.957	404.39	260.627	404.39	194.188	404.39	301.231	404.39	253.382	404.39	159.903	404.39	128.657	404.39	121.135	404.39	39.1311	404.39	167.152	404.39	251.324	404.39	150.902	404.39	141.307
	353.115	1730.76	405.341	256.37	405.341	142.162	405.341	258.446	405.341	193.149	405.341	301.144	405.341	254.837	405.341	166.76	405.341	134.117	405.341	123.491	405.341	40.5143	405.341	166.94	405.341	258.274	405.341	150.371	405.341	141.469
	353.597	1766.68	406.293	256.755	406.293	144.584	406.293	255.45	406.293	191.493	406.293	300.007	406.293	255.485	406.293	173.842	406.293	141.533	406.293	125.718	406.293	41.7551	406.293	166.781	406.293	264.344	406.293	149.586	406.293	141.536
	354.079	1804.76	407.244	256.016	407.244	146.188	407.244	251.654	407.244	189.183	407.244	297.799	407.244	255.246	407.244	180.821	407.244	150.096	407.244	127.731	407.244	42.7195	407.244	166.521	407.244	269.499	407.244	148.533	407.244	141.463
	354.562	1845.38	408.195	254.199	408.195	146.951	408.195	247.05	408.195	186.199	408.195	294.479	408.195	254.078	408.195	187.647	408.195	156.946	408.195	129.455	408.195	43.361	408.195	165.944	408.195	273.59	408.195	147.202	408.195	141.219
	355.044	1888.98	409.146	251.349	409.146	146.863	409.146	241.614	409.146	182.534	409.146	290.052	409.146	251.951	409.146	194.273	409.146	160.371	409.146	130.839	409.146	43.648	409.146	164.914	409.146	276.543	409.146	145.589	409.146	140.774
	355.526	1936.26	410.098	247.515	410.098	145.936	410.098	235.395	410.098	178.259	410.098	284.634	410.098	248.86	410.098	200.551	410.098	163.71	410.098	131.781	410.098	43.533	410.098	163.586	410.098	278.316	410.098	143.694	410.098	140.109
	356.008	1985.86	411.049	242.695	411.049	144.176	411.049	228.477	411.049	173.408	411.049	278.239	411.049	244.823	411.049	205.875	411.049	166.038	411.049	132.356	411.049	42.9936	411.049	161.865	411.049	278.871	411.049	141.521	411.049	139.265
	356.49	2036.43	412	236.894	412	141.615	412	220.879	412	168.008	412	270.82	412	239.89	412	210.017	412	167.528	412	132.523	412	42.0168	412	159.698	412	278.18	412	139.064	412	138.19
	356.972	2087.53	412.951	230.134	412.951	138.299	412.951	212.582	412.951	162.097	412.951	262.448	412.951	234.106	412.951	212.572	412.951	168.284	412.951	132.183	412.951	40.587	412.951	157.081	412.951	276.239	412.951	136.322	412.951	136.849
	357.454	2139.92	413.902	222.541	413.902	134.286	413.902	203.81	413.902	155.721	413.902	253.287	413.902	227.502	413.902	212.711	413.902	168.432	413.902	131.308	413.902	38.7083	413.902	154.073	413.902	273.064	413.902	133.296	413.902	135.222
	357.936	2193.63	414.854	214.233	414.854	129.638	414.854	194.679	414.854	148.933	414.854	243.451	414.854	220.122	414.854	211.917	414.854	166.573	414.854	129.795	414.854	36.374	414.854	150.501	414.854	268.627	414.854	129.994	414.854	133.303
	358.418	2248.93	415.805	205.23	415.805	124.426	415.805	185.268	415.805	141.791	415.805	233.056	415.805	212.015	415.805	208.16	415.805	163.886	415.805	127.704	415.805	33.5699	415.805	146.37	415.805	262.938	415.805	126.425	415.805	131.093
	358.901	2306.29	416.756	195.57	416.756	118.731	416.756	175.669	416.756	134.372	416.756	222.202	416.756	203.238	416.756	202.049	416.756	160.165	416.756	125.128	416.756	30.2954	416.756	141.722	416.756	256.038	416.756	122.599	416.756	128.572
	359.383	2366.75	417.707	185.425	417.707	112.633	417.707	165.976	417.707	126.79	417.707	210.988	417.707	193.894	417.707	194.385	417.707	155.148	417.707	122.13	417.707	26.5635	417.707	136.523	417.707	247.955	417.707	118.534	417.707	125.815
	359.865	2429.55	418.659	174.903	418.659	106.215	418.659	156.288	418.659	119.072	418.659	199.526	418.659	184.083	418.659	182.431	418.659	149.011	418.659	118.645	418.659	22.3917	418.659	130.802	418.659	238.786	418.659	114.258	418.659	122.912
	360.347	2493.78	419.61	164.108	419.61	99.5573	419.61	146.697	419.61	111.283	419.61	187.936	419.61	173.913	419.61	170.497	419.61	140.28	419.61	114.687	419.61	17.7983	419.61	124.573	419.61	228.559	419.61	109.795	419.61	119.896
	360.829	2558.72	420.561	153.147	420.561	92.7519	420.561	137.267	420.561	103.497	420.561	176.365	420.561	163.506	420.561	158.457	420.561	130.384	420.561	110.291	420.561	12.8041	420.561	117.857	420.561	217.391	420.561	105.226	420.561	116.803
	361.311	2624.41	421.512	142.133	421.512	85.8746	421.512	128.092	421.512	95.7862	421.512	164.911	421.512	152.984	421.512	146.248	421.512	119.519	421.512	105.505	421.512	7.4234	421.512	110.713	421.512	205.423	421.512	100.587	421.512	113.648
	361.793	2691.28	422.463	131.174	422.463	78.9973	422.463	119.203	422.463	88.2114	422.463	153.64	422.463	142.45	422.463	133.857	422.463	105.918	422.463	100.393	422.463	1.66853	422.463	103.224	422.463	192.761	422.463	95.9038	422.463	110.45
	362.275	2759.16	423.415	120.362	423.415	72.1727	423.415	110.658	423.415	80.8237	423.415	142.719	423.415	131.999	423.415	121.432	423.415	94.4776	423.415	94.972	423.415	-4.3921	423.415	95.4741	423.415	179.575	423.415	91.2034	423.415	107.241
	362.757	2827.22	424.366	109.785	424.366	65.4258	424.366	102.489	424.366	73.6586	424.366	132.206	424.366	121.705	424.366	109.1	424.366	83.5076	424.366	89.2774	424.366	-10.5395	424.366	87.5327	424.366	166.012	424.366	86.505	424.366	104.038
	363.24	2894.16	425.317	99.5264	425.317	58.8259	425.317	94.7011	425.317	66.7475	425.317	122.11	425.317	111.647	425.317	96.9287	425.317	72.9751	425.317	83.2848	425.317	-10.8844	425.317	79.4653	425.317	152.249	425.317	81.824	425.317	100.802
	363.722	2959.45	426.268	89.6421	426.268	52.4509	426.268	87.3319	426.268	60.1512	426.268	112.435	426.268	101.896	426.268	84.98	426.268	63.16	426.268	77.0633	426.268	-11.4972	426.268	71.3468	426.268	138.588	426.268	77.1715	426.268	97.5108
	364.204	3022.98	427.22	80.2386	427.22	46.3562	427.22	80.3952	427.22	53.8523	427.22	103.168	427.22	92.4896	427.22	73.3368	427.22	53.651	427.22	70.5989	427.22	-12.3109	427.22	63.1896	427.22	125.047	427.22	72.5612	427.22	94.1365
	364.686	3085.17	428.171	71.3669	428.171	40.6024	428.171	73.8534	428.171	47.8794	428.171	94.316	428.171	83.4664	428.171	62.1182	428.171	44.7094	428.171	64.0028	428.171	-13.2521	428.171	55.1439	428.171	111.756	428.171	68.0089	428.171	90.7062
	365.168	3145.68	429.122	63.0675	429.122	35.2306	429.122	67.6846	429.122	42.2651	429.122	85.8707	429.122	74.8869	429.122	53.3027	429.122	38.6876	429.122	57.4094	429.122	-14.2267	429.122	47.3113	429.122	98.8187	429.122	63.5333	429.122	87.2266
	365.65	3203.28	430.073	55.3795	430.073	30.2785	430.073	61.8593	430.073	37.0342	430.073	77.8596	430.073	66.7938	430.073	47.1964	430.073	36.0454	430.073	50.9154	430.073	-15.1569	430.073	39.7753	430.073	86.3591	430.073	59.1584	430.073	83.7155
	366.132	3256.23	431.024	48.3248	431.024	25.7617	431.024	56.4051	431.024	32.2022	431.024	70.3045	431.024	59.2847	431.024	39.6389	431.024	32.3254	431.024	44.5717	431.024	-15.9345	431.024	32.617	431.024	74.4933	431.024	54.9031	431.024	80.1946
	366.614	3304.12	431.976	41.8822	431.976	21.7006	431.976	51.3455	431.976	27.7819	431.976	63.2215	431.976	52.3582	431.976	32.9279	431.976	28.0795	431.976	38.4473	431.976	-16.4754	431.976	25.9022	431.976	63.3507	431.976	50.7864	431.976	76.735
	367.097	3347.54	432.927	36.0523	432.927	18.112	432.927	46.6834	432.927	23.7772	432.927	56.6028	432.927	46.0351	432.927	26.6777	432.927	23.867	432.927	32.6147	432.927	-16.6991	432.927	19.674	432.927	53.0483	432.927	46.8111	432.927	73.5892
	367.579	3386.48	433.878	30.8382	433.878	15.0038	433.878	42.4002	433.878	20.1744	433.878	50.4308	433.878	40.3242	433.878	21.0352	433.878	19.6671	433.878	27.1394	433.878	-16.454	433.878	13.9587	433.878	43.6843	433.878	42.9819	433.878	70.486
	368.061	3420.35	434.829	26.2546	434.829	12.3711	434.829	38.4712	434.829	16.9302	434.829	44.6925	434.829	35.1822	434.829	16.3594	434.829	15.2445	434.829	22.0735	434.829	-15.8016	434.829	8.83758	434.829	35.3601	434.829	39.2985	434.829	67.3506
	368.543	3448.77	435.78	22.2767	435.78	10.2041	435.78	34.8744	435.78	14.0207	435.78	39.3792	435.78	30.6339	435.78	12.5102	435.78	11.8681	435.78	17.4566	435.78	-14.775	435.78	4.32841	435.78	27.9002	435.78	35.7529	435.78	64.196
	369.025	3472.12	436.732	18.8317	436.732	8.48728	436.732	31.5798	436.732	11.4308	436.732	34.4677	436.732	26.6181	436.732	9.1799	436.732	9.10789	436.732	13.3338	436.732	-13.2526	436.732	0.46451	436.732	21.5007	436.732	32.3381	436.732	61.0233
	369.507	3490.66	437.683	15.8462	437.683	7.20256	437.683	28.5477	437.683	9.14563	437.683	29.926	437.683	23.0893	437.683	6.38831	437.683	7.0515	437.683	9.75921	437.683	-11.1893	437.683	-2.7383	437.683	16.2449	437.683	29.0435	437.683	57.7919
	369.989	3503.56	438.634	13.3189	438.634	6.32962	438.634	25.7671	438.634	7.15751	438.634	25.7729	438.634	20.061	438.634	4.13089	438.634	5.63106	438.634	6.77538	438.634	-8.57717	438.634	-5.32616	438.634	11.9005	438.634	25.8633	438.634	54.539
	370.471	3509.43	439.585	11.1731	439.585	5.84287	439.585	23.213	439.585	5.45041	439.585	21.9879	439.585	17.5014	439.585	2.39287	439.585	4.14657	439.585	4.42106	439.585	-5.36098	439.585	-7.2843	439.585	8.42686	439.585	22.7921	439.585	51.3168
	370.954	3507.79	440.537	9.37498	440.537	4.77367	440.537	20.8639	440.537	4.00756	440.537	18.587	440.537	15.3704	440.537	1.06311	440.537	2.88256	440.537	2.72026	440.537	-1.5602	440.537	-8.74351	440.537	5.7896	440.537	19.8246	440.537	48.1437
	371.436	3499.65	441.488	7.89267	441.488	2.88008	441.488	18.7042	441.488	2.81004	441.488	15.5739	441.488	13.6301	441.488	0.08583	441.488	2.00384	441.488	1.66729	441.488	2.1649	441.488	-9.76732	441.488	3.90824	441.488	16.9541	441.488	45.0586
	371.918	3485.82	442.439	6.69338	442.439	1.31492	442.439	16.7272	442.439	1.8357	442.439	12.9411	442.439	12.2515	442.439	-0.59639	442.439	1.53445	442.439	0.96786	442.439	1.11168	442.439	-9.99164	442.439	2.65437	442.439	14.1751	442.439	42.0863
	372.4	3465.64	443.39	5.74214	443.39	0.06846	443.39	14.9164	443.39	1.0627	443.39	10.6826	443.39	11.2258	443.39	-1.07737	443.39	1.20925	443.39	0.66316	443.39	0.47122	443.39	-9.62058	443.39	1.94955	443.39	11.4736	443.39	39.2444
	372.882	3438.53	444.341	5.00844	444.341	-0.88504	444.341	13.2616	444.341	0.4757	444.341	8.80164	444.341	10.5272	444.341	-1.36162	444.341	1.27948	444.341	0.7314	444.341	0.18579	444.341	-8.87066	444.341	1.70823	444.341	8.84246	444.341	36.5289
	373.364	3405.28	445.293	4.45924	445.293	-1.56719	445.293	11.7468	445.293	0.05925	445.293	7.24611	445.293	10.1044	445.293	-1.29911	445.293	1.41774	445.293	1.09887	445.293	0.17251	445.293	-7.78445	445.293	1.85564	445.293	6.27991	445.293	33.9396
	373.846	3367.95	446.244	4.05834	446.244	-2.00606	446.244	10.3514	446.244	-0.20301	446.244	5.93195	446.244	9.70028	446.244	-0.96396	446.244	1.67538	446.244	1.72966	446.244	0.34032	446.244	-6.40642	446.244	2.32181	446.244	3.78436	446.244	31.4415
	374.328	3327.04	447.195	3.74861	447.195	-2.23295	447.195	9.08593	447.195	-0.37843	447.195	4.83657	447.195	9.5216	447.195	-0.64759	447.195	2.09093	447.195	2.5812	447.195	0.6174	447.195	-4.78103	447.195	3.02551	447.195	1.35686	447.195	28.9867
	374.81	3281.23	448.146	3.46555	448.146	-2.27248	448.146	7.90377	448.146	-0.55707	448.146	3.93829	448.146	9.53069	448.146	-0.15545	448.146	2.61483	448.146	3.6102	448.146	0.99107	448.146	-2.95847	448.146	3.89535	448.146	-0.99433	448.146	26.576
	375.293	3229.93	449.098	3.26058	449.098	-2.1466	449.098	6.78624	449.098	-0.61132	449.098	3.21973	449.098	9.71038	449.098	0.69943	449.098	3.53212	449.098	4.77091	449.098	1.43804	449.098	-0.98396	449.098	4.84546	449.098	-3.26025	449.098	24.2045
	375.775	3173.94	450.049	3.12676	450.049	-1.87541	450.049	5.729	450.049	-0.5464	450.049	2.65652	450.049	10.0316	450.049	1.80131	450.049	4.87908	450.049	6.01983	450.049	1.91726	450.049	1.10459	450.049	5.84602	450.049	-5.42983	450.049	21.8821
	376.257	3115.42	451	3.07459	451	-1.4809	451	4.73914	451	-0.36125	451	2.23225	451	10.4535	451	3.09839	451	6.78894	451	7.30524	451	2.40429	451	3.26013	451	6.967	451	-7.4775	451	19.6039
	376.739	3055.11	451.951	3.06083	451.951	-0.9678	451.951	3.8506	451.951	-0.05184	451.951	1.96848	451.951	10.9984	451.951	4.54262	451.951	9.49487	451.951	8.71505	451.951	2.8938	451.951	5.44297	451.951	8.09346	451.951	-9.37989	451.951	17.3589
	377.221	2993.25	452.902	3.10389	452.902	-0.34836	452.902	3.05317	452.902	0.37582	452.902	1.96089	452.902	11.6514	452.902	6.05318	452.902	11.0472	452.902	10.1687	452.902	3.54986	452.902	7.62418	452.902	9.21796	452.902	-11.1128	452.902	15.1332
	377.703	2930.05	453.854	3.21569	453.854	0.36367	453.854	2.35238	453.854	0.914	453.854	2.10806	453.854	12.393	453.854	7.45844	453.854	12.41	453.854	11.6077	453.854	4.34108	453.854	9.78884	453.854	10.3353	453.854	-12.6541	453.854	12.9077
	378.185	2865.92	454.805	3.38981	454.805	1.15425	454.805	1.75226	454.805	1.54531	454.805	2.41839	454.805	13.1997	454.805	8.77809	454.805	13.5787	454.805	12.9922	454.805	5.13696	454.805	11.9137	454.805	11.4136	454.805	-13.983	454.805	10.7351
	378.667	2801.05	455.756	3.63181	455.756	2.015	455.756	1.2403	455.756	2.25823	455.756	2.90192	455.756	14.0689	455.756	10.0359	455.756	14.5456	455.756	14.2995	455.756	5.96562	455.756	13.9041	455.756	12.3728	455.756	-15.097	455.756	8.65513
	379.149	2734.82	456.707	3.94231	456.707	2.93934	456.707	0.82484	456.707	3.04107	456.707	3.58733	456.707	14.99	456.707	11.2177	456.707	15.4744	456.707	15.5144	456.707	6.80114	456.707	15.7495	456.707	13.2611	456.707	-15.9961	456.707	6.67667
	379.632	2667.18	457.659	4.32231	457.659	3.91885	457.659	0.51706	457.659	3.88354	457.659	4.44629	457.659	15.9603	457.659	12.3786	457.659	16.1891	457.659	16.6211	457.659	7.63295	457.659	17.4224	457.659	14.0704	457.659	-16.6859	457.659	4.80497
	380.114	2597.84	458.61	4.77646	458.61	4.95227	458.61	0.31583	458.61	4.7714	458.61	5.44622	458.61	16.9526	458.61	13.6246	458.61	16.54	458.61	17.6051	458.61	8.45357	458.61	18.8968	458.61	14.781	458.61	-17.1773	458.61	3.04561
	380.596	2528.57	459.561	5.3175	459.561	6.05227	459.561	0.26337	459.561	5.68977	459.561	6.5762	459.561	17.9604	459.561	14.9428	459.561	16.5689	459.561	18.4614	459.561	9.25412	459.561	20.1513	459.561	15.3837	459.561	-17.4746	459.561	1.36311
	381.078	2461.16	460.512	5.94901	460.512	7.22289	460.512	0.42368	460.512	6.63878	460.512	7.89556	460.512	18.9566	460.512	16.2431	460.512	16.4586	460.512	19.1973	460.512	10.0237	460.512	21.1771	460.512	15.8787	460.512	-17.5838	460.512	-0.20381
	381.56	2397.4	461.463	6.67166	461.463	8.46415	461.463	0.68517	461.463	7.61168	461.463	9.37528	461.463	19.9512	461.463	17.562	461.463	16.7368	461.463	19.8095	461.463	10.7595	461.463	21.9615	461.463	16.2661	461.463	-17.516	461.463	-1.64156
	382.042	2337.85	462.415	7.48017	462.415	9.77327	462.415	1.03195	462.415	8.60458	462.415	11.0092	462.415	20.9717	462.415	18.8029	462.415	17.0794	462.415	20.2987	462.415	11.4514	462.415	22.4937	462.415	16.5463	462.415	-17.2848	462.415	-2.9249
	382.524	2282.38	463.366	8.36641	463.366	11.1453	463.366	1.45459	463.366	9.61823	463.366	12.8102	463.366	22.0152	463.366	19.8922	463.366	17.4104	463.366	20.6635	463.366	12.0787	463.366	22.7712	463.366	16.7226	463.366	-16.8998	463.366	-4.03308
	383.006	2229.53	464.317	9.31846	464.317	12.5735	464.317	1.96945	464.317	10.6542	464.317	14.7406	464.317	23.0834	464.317	20.7624	464.317	17.6465	464.317	20.905	464.317	12.6398	464.317	22.7956	464.317	16.8116	464.317	-16.389	464.317	-4.93844
	383.488	2178.87	465.268	10.3259	465.268	14.0327	465.268	2.57096	465.268	11.7116	465.268	16.763	465.268	24.1848	465.268	21.2819	465.268	17.559	465.268	21.0321	465.268	13.1272	465.268	22.5802	465.268	16.8264	465.268	-15.7791	465.268	-5.60813
	383.971	2130	466.22	11.3781	466.22	15.5009	466.22	3.25346	466.22	12.7827	466.22	18.8446	466.22	25.3207	466.22	21.2903	466.22	17.3579	466.22	21.0516	466.22	13.5303	466.22	22.1594	466.22	16.7821	466.22	-15.0974	466.22	-6.09451
	384.453	2084.84	467.171	12.4662	467.171	16.9554	467.171	4.00267	467.171	13.8588	467.171	20.9626	467.171	26.4714	467.171	20.9988	467.171	16.9897	467.171	20.971	467.171	13.8339	467.171	21.5712	467.171	16.6866	467.171	-14.372	467.171	-6.44665
	384.935	2043.46	468.122	13.5773	468.122	18.3704	468.122	4.79102	468.122	14.9335	468.122	23.1036	468.122	27.6551	468.122	20.4765	468.122	16.5237	468.122	20.8046	468.122	14.0356	468.122	20.8587	468.122	16.5539	468.122	-13.6218	468.122	-6.68987
	385.417	2005.41	469.073	14.7033	469.073	19.7096	469.073	5.5996	469.073	16.0064	469.073	25.2063	469.073	28.8643	469.073	19.7625	469.073	16.119	469.073	20.5682	469.073	14.1271	469.073	20.0789	469.073	16.3562	469.073	-12.9152	469.073	-6.86945
	385.899	1969.82	470.024	15.8349	470.024	20.9489	470.024	6.38944	470.024	17.0754	470.024	27.2526	470.024	30.1013	470.024	18.946	470.024	15.5657	470.024	20.2721	470.024	14.1051	470.024	19.2596	470.024	16.1087	470.024	-12.2769	470.024	-7.01284
	386.381	1936.14	470.976	16.9673	470.976	22.0706	470.976	7.16275	470.976	18.1353	470.976	29.2202	470.976	31.3698	470.976	17.9226	470.976	14.8926	470.976	19.9247	470.976	13.9698	470.976	18.4143	470.976	15.8302	470.976	-11.7223	470.976	-7.14824
	386.863	1904.25	471.927	18.1025	471.927	23.0702	471.927	7.94698	471.927	19.1855	471.927	31.122	471.927	32.639	471.927	16.7428	471.927	14.1642	471.927	19.5269	471.927	13.725	471.927	17.5471	471.927	15.536	471.927	-11.2677	471.927	-7.32061
	387.346	1875.16	472.878	19.2276	472.878	23.9825	472.878	8.75951	472.878	20.2265	472.878	32.9527	472.878	33.9148	472.878	15.4642	472.878	13.4803	472.878	19.0472	472.878	13.3656	472.878	16.6718	472.878	15.2484	472.878	-10.9175	472.878	-7.55791
	387.828	1850.24	473.829	20.338	473.829	24.8121	473.829	9.6119	473.829	21.2524	473.829	34.6972	473.829	35.1827	473.829	14.1597	473.829	13.128	473.829	18.5244	473.829	12.9552	473.829	15.8037	473.829	14.9746	473.829	-10.6737	473.829	-7.84484
	388.31	1830.29	474.78	21.4327	474.78	25.5593	474.78	10.5078	474.78	22.2561	474.78	36.3632	474.78	36.4322	474.78	12.8143	474.78	12.8352	474.78	17.9783	474.78	12.5219	474.78	14.963	474.78	14.7193	474.78	-10.539	474.78	-8.14138
	388.792	1814.4	475.732	22.5128	475.732	26.2195	475.732	11.4504	475.732	23.2355	475.732	37.9505	475.732	37.6603	475.732	11.4872	475.732	12.4801	475.732	17.4223	475.732	12.0912	475.732	14.1577	475.732	14.4858	475.732	-10.5151	475.732	-8.39057
	389.274	1801.91	476.683	23.5861	476.683	26.7832	476.683	12.4516	476.683	24.1884	476.683	39.4254	476.683	38.8748	476.683	10.2224	476.683	12.0743	476.683	16.8702	476.683	11.7081	476.683	13.3577	476.683	14.272	476.683	-10.6059	476.683	-8.60579
	389.756	1792.38	477.634	24.654	477.634	27.2581	477.634	13.514	477.634	25.1129	477.634	40.8145	477.634	40.0425	477.634	9.06617	477.634	11.6805	477.634	16.3281	477.634	11.3926	477.634	12.5764	477.634	14.113	477.634	-10.8094	477.634	-8.74938
	390.238	1785.1	478.585	25.7161	478.585	27.6504	478.585	14.6371	478.585	26.0027	478.585	42.1377	478.585	41.1472	478.585	8.43527	478.585	11.4885	478.585	15.8122	478.585	11.156	478.585	11.8111	478.585	14.0151	478.585	-11.1224	478.585	-8.78796
	390.72	1778.78	479.537	26.7709	479.537	27.9683	479.537	15.797	479.537	26.8535	479.537	43.4076	479.537	42.1934	479.537	8.20381	479.537	11.3485	479.537	15.3402	479.537	10.9994	479.537	11.0657	479.537	13.9772	479.537	-11.5432	479.537	-8.71015
	391.202	1773.8	480.488	27.8116	480.488	28.2198	480.488	16.9712	480.488	27.6725	480.488	44.6274	480.488	43.1984	480.488	8.25473	480.488	11.4733	480.488	14.9158	480.488	10.9137	480.488	10.3495	480.488	14.0008	480.488	-12.0753	480.488	-8.56095
	391.685	1771.18	481.439	28.8204	481.439	28.4196	481.439	18.1303	481.439	28.4601	481.439	45.7855	481.439	44.1542	481.439	8.50994	481.439	11.9598	481.439	14.5489	481.439	10.8827	481.439	9.66295	481.439	14.0977	481.439	-12.7078	481.439	-8.63376
	392.167	1772.2	482.39	29.7879	482.39	28.5891	482.39	19.2662	482.39	29.2185	482.39	46.8909	482.39	45.0743	482.39	8.97493	482.39	12.7251	482.39	14.2492	482.39	10.7904	482.39	9.00781	482.39	14.2716	482.39	-13.4296	482.39	-8.71278
	392.649	1776.33	483.341	30.7068	483.341	28.7481	483.341	20.3677	483.341	29.9543	483.341	47.9441	483.341	45.9478	483.341	9.63879	483.341	13.3724	483.341	14.0276	483.341	10.7263	483.341	8.38731	483.341	14.521	483.341	-14.2222	483.341	-8.73593
	393.131	1782.59	484.293	31.5725	484.293	28.9146	484.293	21.4217	484.293	30.6746	484.293	48.9381	484.293	46.767	484.293	10.3977	484.293	14.0827	484.293	13.8956	484.293	10.7843	484.293	7.80474	484.293	14.8477	484.293	-15.0644	484.293	-8.68586
	393.613	1789.92	485.244	32.384	485.244	29.1092	485.244	22.4321	485.244	31.3797	485.244	49.8655	485.244	47.5615	485.244	11.2209	485.244	14.8145	485.244	13.8638	485.244	10.9084	485.244	7.26008	485.244	15.263	485.244	-15.9358	485.244	-8.55929
	394.095	1797.73	486.195	33.1454	486.195	29.3482	486.195	23.4188	486.195	32.0635	486.195	50.7765	486.195	48.3291	486.195	12.0902	486.195	15.4675	486.195	13.9298	486.195	11.0938	486.195	6.75583	486.195	15.7571	486.195	-16.8153	486.195	-8.287
	394.577	1806.73	487.146	33.8571	487.146	29.6405	487.146	24.3811	487.146	32.7236	487.146	51.6658	487.146	49.055	487.146	13.0829	487.146	15.8097	487.146	14.0942	487.146	11.34	487.146	6.29163	487.146	16.336	487.146	-17.6869	487.146	-7.89755
	395.059	1818.5	488.098	34.5174	488.098	29.9916	488.098	25.3124	488.098	33.3606	488.098	52.5364	488.098	49.7285	488.098	14.2543	488.098	16.3979	488.098	14.3553	488.098	11.6454	488.098	5.86779	488.098	17.0078	488.098	-18.5351	488.098	-7.41055
	395.541	1833.98	489.049	35.1227	489.049	30.4058	489.049	26.2026	489.049	33.9736	489.049	53.4004	489.049	50.3556	489.049	15.6234	489.049	17.0683	489.049	14.7094	489.049	12.0074	489.049	5.48587	489.049	17.7835	489.049	-19.3435	489.049	-6.80436
	396.024	1852.4	490	35.6713	490	30.8904	490	27.0474	490	34.5637	490	54.2368	490	50.953	490	17.2375	490	17.8015	490	15.1523	490	12.4344	490	5.14039	490	18.6611	490	-20.1349	490	-6.07622
	396.506	1872.6	490.951	36.1612	490.951	31.4408	490.951	27.8416	490.951	35.1328	490.951	55.0491	490.951	51.5246	490.951	19.2163	490.951	18.7592	490.951	15.6778	490.951	12.9252	490.951	4.8484	490.951	19.6292	490.951	-20.8869	490.951	-5.23098
	396.988	1894.3	491.902	36.5906	491.902	32.0475	491.902	28.5789	491.902	35.6816	491.902	55.8253	491.902	52.0683	491.902	21.436	491.902	19.8065	491.902	16.2788	491.902	13.4798	491.902	4.58951	491.902	20.6781	491.902	-21.5741	491.902	-4.30524
	397.47	1918.22	492.854	36.9569	492.854	32.6945	492.854	29.2571	492.854	36.2094	492.854	56.5478	492.854	52.5764	492.854	23.7849	492.854	20.9842	492.854	16.9474	492.854	14.0983	492.854	4.32416	492.854	21.7995	492.854	-22.1706	492.854	-3.35993
	397.952	1944.82	493.805	37.2565	493.805	33.3613	493.805	29.8735	493.805	36.7144	493.805	57.2371	493.805	53.0409	493.805	26.2216	493.805	22.2251	493.805	17.6764	493.805	14.7816	493.805	4.05994	493.805	22.9866	493.805	-22.6504	493.805	-2.44285
	398.434	1973.74	494.756	37.4855	494.756	34.0248	494.756	30.4231	494.756	37.1946	494.756	57.9162	494.756	53.4639	494.756	28.705	494.756	23.4676	494.756	18.4593	494.756	15.5207	494.756	3.7967	494.756	24.2235	494.756	-22.9814	494.756	-1.53804
	398.916	2004.37	495.707	37.6391	495.707	34.6577	495.707	30.9105	495.707	37.6427	495.707	58.576	495.707	53.8459	495.707	31.173	495.707	24.805	495.707	19.2886	495.707	16.3345	495.707	3.55018	495.707	25.4846	495.707	-23.1482	495.707	-0.64127
	399.398	2036.27	496.659	37.7073	496.659	35.2367	496.659	31.3405	496.659	38.05	496.659	59.1982	496.659	54.1864	496.659	33.609	496.659	25.8198	496.659	20.1559	496.659	17.217	496.659	3.3368	496.659	26.7455	496.659	-23.1401	496.659	0.261
	399.88	2069.38	497.61	37.6739	497.61	35.7465	497.61	31.7133	497.61	38.4064	497.61	59.7531	497.61	54.4882	497.61	35.8826	497.61	26.8961	497.61	21.0509	497.61	18.1462	497.61	3.16639	497.61	27.9846	497.61	-22.9479	497.61	1.19523
	400.363	2103.75	498.561	37.5306	498.561	36.1677	498.561	32.015	498.561	38.6999	498.561	60.2332	498.561	54.7347	498.561	38.0142	498.561	27.9477	498.561	21.9535	498.561	19.1215	498.561	3.0151	498.561	29.1827	498.561	-22.5669	498.561	2.16396
	400.845	2139.2	499.512	37.273	499.512	36.4857	499.512	32.2244	499.512	38.9014	499.512	60.5677	499.512	54.9003	499.512	40.1285	499.512	28.5737	499.512	22.8465	499.512	20.1277	499.512	2.86152	499.512	30.3158	499.512	-22.0007	499.512	3.18771
	401.327	2175.07	500.463	36.8977	500.463	36.6855	500.463	32.3311	500.463	38.9901	500.463	60.7137	500.463	54.9588	500.463	42.169	500.463	29.1366	500.463	23.7097	500.463	21.151	500.463	2.68179	500.463	31.3672	500.463	-21.259	500.463	4.25963
	401.809	2210.48	501.415	36.4007	501.415	36.7544	501.415	32.3281	501.415	38.9496	501.415	60.6529	501.415	54.8832	501.415	44.1367	501.415	28.7905	501.415	24.522	501.415	22.1731	501.415	2.45188	501.415	32.3185	501.415	-20.3572	501.415	5.3879
	402.291	2245.01	502.366	35.7765	502.366	36.682	502.366	32.2142	502.366	38.7652	502.366	60.385	502.366	54.645	502.366	45.9933	502.366	28.8229	502.366	25.2625	502.366	23.1687	502.366	2.14935	502.366	33.1419	502.366	-19.3143	502.366	6.63999
	402.773	2278.71	503.317	35.0299	503.317	36.4578	503.317	31.977	503.317	38.4379	503.317	59.7579	503.317	54.2231	503.317	47.6955	503.317	29.8884	503.317	25.9217	503.317	24.1016	503.317	1.75644	503.317	33.8094	503.317	-18.1587	503.317	7.99877
	403.255	2312.05	504.268	34.1619	504.268	36.0748	504.268	31.612	504.268	37.9702	504.268	58.8765	504.268	53.5981	504.268	49.1414	504.268	30.8425	504.268	26.4901	504.268	24.9557	504.268	1.26731	504.268	34.3133	504.268	-16.9048	504.268	9.4398
	403.737	2345.4	505.22	33.1758	505.22	35.5323	505.22	31.1054	505.22	37.3659	505.22	57.8092	505.22	52.7458	505.22	50.2172	505.22	31.7995	505.22	26.9588	505.22	25.7229	505.22	0.68101	505.22	34.646	505.22	-15.569	505.22	10.9505
	404.219	2377.73	506.171	32.0777	506.171	34.8347	506.171	30.4452	506.171	36.6309	506.171	56.5731	506.171	51.652	506.171	50.7885	506.171	32.561	506.171	27.3209	506.171	26.4008	506.171	0	506.171	34.8012	506.171	-14.1678	506.171	12.5241
	404.702	2408.31	507.122	30.8739	507.122	33.9909	507.122	29.6673	507.122	35.7794	507.122	55.1786	507.122	50.3547	507.122	50.9132	507.122	33.2413	507.122	27.5736	507.122	26.9814	507.122	-0.23471	507.122	34.7893	507.122	-12.7168	507.122	14.1368
	405.184	2436.94	508.073	29.5607	508.073	33.0113	508.073	28.7883	508.073	34.8136	508.073	53.6415	508.073	48.8877	508.073	50.7228	508.073	34.0529	508.073	27.7095	508.073	27.447	508.073	-0.55514	508.073	34.6057	508.073	-11.2494	508.073	15.8339
	405.666	2464.37	509.024	28.143	509.024	31.9103	509.024	27.8244	509.024	33.7305	509.024	51.957	509.024	47.2788	509.024	50.1153	509.024	35.209	509.024	27.7271	509.024	27.7835	509.024	-0.96094	509.024	34.2462	509.024	-9.79438	509.024	17.5579
	406.148	2489.74	509.976	26.6291	509.976	30.7043	509.976	26.7983	509.976	32.532	509.976	50.1234	509.976	45.5426	509.976	49.2853	509.976	36.1097	509.976	27.6252	509.976	27.9812	509.976	-1.4478	509.976	33.7112	509.976	-8.37996	509.976	19.2545
	406.63	2511.65	510.927	25.0299	510.927	29.4114	510.927	25.7382	510.927	31.2276	510.927	48.1492	510.927	43.6785	510.927	48.293	510.927	36.805	510.927	27.3997	510.927	28.0355	510.927	-2.00534	510.927	33.0066	510.927	-7.03382	510.927	20.904
	407.112	2529.87	511.878	23.3546	511.878	28.0413	511.878	24.6307	511.878	29.8296	511.878	46.0217	511.878	41.7086	511.878	47.1641	511.878	37.3243	511.878	27.0512	511.878	27.9421	511.878	-2.62196	511.878	32.1544	511.878	-5.78997	511.878	22.4418
	407.594	2545.62	512.829	21.6226	512.829	26.5947	512.829	23.4385	512.829	28.3543	512.829	43.7598	512.829	39.6745	512.829	45.8927	512.829	37.6829	512.829	26.5828	512.829	27.6941	512.829	-3.29692	512.829	31.1735	512.829	-4.6645	512.829	23.8554
	408.077	2559.17	513.781	19.856	513.781	25.0771	513.781	22.1569	513.781	26.825	513.781	41.4002	513.781	37.5904	513.781	44.4718	513.781	35.6266	513.781	25.9982	513.781	27.2901	513.781	-4.02384	513.781	30.0728	513.781	-3.66839	513.781	25.1267
	408.559	2569.74	514.732	18.0758	514.732	23.4976	514.732	20.7973	514.732	25.2654	514.732	38.9856	514.732	35.4726	514.732	42.8064	514.732	33.669	514.732	25.3026	514.732	26.7352	514.732	-4.79162	514.732	28.861	514.732	-2.80752	514.732	26.2562
	409.041	2575.36	515.683	16.2989	515.683	21.8668	515.683	19.3714	515.683	23.6944	515.683	36.5513	515.683	33.378	515.683	40.9383	515.683	31.5306	515.683	24.5042	515.683	26.0456	515.683	-5.58205	515.683	27.5606	515.683	-2.08027	515.683	27.2892
	409.523	2576.08	516.634	14.5525	516.634	20.2021	516.634	17.8569	516.634	22.128	516.634	34.1052	516.634	31.324	516.634	38.9239	516.634	28.9149	516.634	23.6101	516.634	25.2287	516.634	-6.38464	516.634	26.1752	516.634	-1.48809	516.634	28.2305
	410.005	2572.13	517.585	12.8548	517.585	18.5139	517.585	16.3121	517.585	20.5746	517.585	31.6884	517.585	29.3549	517.585	36.7958	517.585	26.3914	517.585	22.6302	517.585	24.2998	517.585	-7.18558	517.585	24.7215	517.585	-1.02512	517.585	29.0952
	410.487	2563.41	518.537	11.2196	518.537	16.8174	518.537	14.7781	518.537	19.0432	518.537	29.3371	518.537	27.4879	518.537	34.5099	518.537	24.0886	518.537	21.5745	518.537	23.2752	518.537	-7.97303	518.537	23.2097	518.537	-0.68827	518.537	29.8994
	410.969	2549.81	519.488	9.65678	519.488	15.1314	519.488	13.2724	519.488	17.545	519.488	27.0782	519.488	25.7162	519.488	32.2854	519.488	22.2332	519.488	20.4537	519.488	22.1709	519.488	-8.73605	519.488	21.6465	519.488	-0.47507	519.488	30.6576
	411.451	2532.44	520.439	8.16979	520.439	13.468	520.439	11.8005	520.439	16.0852	520.439	24.8928	520.439	24.0624	520.439	30.199	520.439	21.0785	520.439	19.2796	520.439	21.0004	520.439	-9.46054	520.439	20.0531	520.439	-0.37139	520.439	31.3922
	411.933	2512.4	521.39	6.77359	521.39	11.8467	521.39	10.3804	521.39	14.6656	521.39	22.7847	521.39	22.5172	521.39	28.279	521.39	20.8864	521.39	18.0617	521.39	19.7671	521.39	-10.1299	521.39	18.4327	521.39	-0.37409	521.39	32.1058
	412.416	2488.39	522.341	5.47246	522.341	10.2789	522.341	9.02338	522.341	13.2967	522.341	20.7586	522.341	21.072	522.341	26.4916	522.341	21.5654	522.341	16.8106	522.341	18.4818	522.341	-10.7392	522.341	16.799	522.341	-0.47169	522.341	32.7987
	412.898	2458.1	523.293	4.27411	523.293	8.77459	523.293	7.73859	523.293	11.9901	523.293	18.8102	523.293	19.7158	523.293	24.8574	523.293	21.9743	523.293	15.5374	523.293	17.1553	523.293	-11.2874	523.293	15.1702	523.293	-0.64678	523.293	33.46
	413.38	2420.69	524.244	3.19445	524.244	7.34575	524.244	6.53442	524.244	10.753	524.244	16.9331	524.244	18.4351	524.244	23.3529	524.244	22.5167	524.244	14.2546	524.244	15.7984	524.244	-11.7768	524.244	13.5639	524.244	-0.87642	524.244	34.0523
	413.862	2377.46	525.195	2.24487	525.195	6.00392	525.195	5.42545	525.195	9.59264	525.195	15.1585	525.195	17.2458	525.195	21.9553	525.195	22.9629	525.195	12.9743	525.195	14.4198	525.195	-12.2107	525.195	11.9862	525.195	-1.13841	525.195	34.5991
	414.344	2330.21	526.146	1.3668	526.146	4.75951	526.146	4.418	526.146	8.5176	526.146	13.5319	526.146	16.1497	526.146	20.6392	526.146	21.9879	526.146	11.7106	526.146	13.0312	526.146	-12.5845	526.146	10.4505	526.146	-1.39781	526.146	35.0953
	414.826	2280.04	527.098	0.61898	527.098	3.62493	527.098	3.49717	527.098	7.53899	527.098	12.0692	527.098	15.146	527.098	19.4117	527.098	20.42	527.098	10.4767	527.098	11.6448	527.098	-12.8953	527.098	8.97062	527.098	-1.61698	527.098	35.5219
	415.308	2227.86	528.049	-0.03707	528.049	2.61328	528.049	2.6592	528.049	6.66524	528.049	10.7719	528.049	14.2245	528.049	18.1883	528.049	18.0638	528.049	9.28614	528.049	10.2719	528.049	-13.1416	528.049	7.5892	528.049	-1.7539	528.049	35.8591
	415.79	2172.72	529	-0.54901	529	1.73909	529	1.91028	529	5.88733	529	9.63752	529	13.3636	529	16.9892	529	15.9557	529	8.16733	529	8.92289	529	-13.3229	529	6.33608	529	-1.7552	529	36.0978
	416.272	2113.72	529.951	-0.81863	529.951	1.00882	529.951	1.26991	529.951	5.20066	529.951	8.69702	529.951	12.5782	529.951	15.8396	529.951	14.9466	529.951	7.13368	529.951	7.62373	529.951	-13.4359	529.951	5.20082	529.951	-1.57859	529.951	36.2297
	416.755	2049.91	530.902	-0.83815	530.902	0.42365	530.902	0.73865	530.902	4.60525	530.902	7.93847	530.902	11.8602	530.902	14.7489	530.902	14.3827	530.902	6.19568	530.902	6.3888	530.902	-13.4816	530.902	4.20076	530.902	-1.20437	530.902	36.2746
	417.237	1982.26	531.854	-0.60112	531.854	-0.01692	531.854	0.31755	531.854	3.6408	531.854	7.34183	531.854	11.2104	531.854	13.7896	531.854	15.2087	531.854	5.36023	531.854	5.23149	531.854	-13.4626	531.854	3.34317	531.854	-0.62542	531.854	36.2314
	417.719	1912.15	532.805	-0.1058	532.805	-0.31408	532.805	0.01125	532.805	2.76188	532.805	6.88608	532.805	10.6287	532.805	12.9474	532.805	16.458	532.805	4.62984	532.805	4.1601	532.805	-13.3818	532.805	2.62721	532.805	0.15731	532.805	36.0868
	418.201	1840.52	533.756	0.63938	533.756	-0.47377	533.756	-0.1891	533.756	1.9661	533.756	6.54119	533.756	10.081	533.756	12.2096	533.756	17.276	533.756	4.00447	533.756	3.16923	533.756	-13.2381	533.756	2.04881	533.756	1.14414	533.756	35.8458
	418.683	1767.89	534.707	1.63328	534.707	-0.50281	534.707	-0.29687	534.707	1.26228	534.707	6.2895	534.707	9.57352	534.707	11.5557	534.707	16.6852	534.707	3.48059	534.707	2.27183	534.707	-13.0409	534.707	1.60862	534.707	2.37503	534.707	35.4852
	419.165	1694.76	535.659	2.87586	535.659	-0.40428	535.659	-0.32621	535.659	0.66251	535.659	6.03509	535.659	9.1192	535.659	11.0027	535.659	12.1522	535.659	3.0588	535.659	1.47999	535.659	-12.7818	535.659	1.30829	535.659	3.86417	535.659	35.0617
	419.647	1621.43	536.61	4.37845	536.61	-0.1853	536.61	-0.28391	536.61	0.18067	536.61	5.79078	536.61	8.73807	536.61	10.5195	536.61	10.8067	536.61	2.73671	536.61	0.80423	536.61	-12.4559	536.61	1.14011	536.61	5.60681	536.61	34.6251
	420.129	1547.73	537.561	6.14996	537.561	0.14144	537.561	-0.17067	537.561	-0.16659	537.561	5.65535	537.561	8.44241	537.561	10.1175	537.561	10.4362	537.561	2.50803	537.561	0.2529	537.561	-12.0651	537.561	1.08195	537.561	7.57883	537.561	34.1761
	420.611	1473.6	538.512	8.12912	538.512	0.56273	538.512	0.00219	538.512	-0.37058	538.512	5.6666	538.512	8.2361	538.512	9.81173	538.512	10.0258	538.512	2.35933	538.512	-0.17961	538.512	-11.6102	538.512	1.11446	538.512	9.7905	538.512	33.6926
	421.094	1399.3	539.463	10.2961	539.463	1.05713	539.463	0.24483	539.463	-0.41869	539.463	5.80114	539.463	8.11133	539.463	9.6325	539.463	9.83277	539.463	2.28219	539.463	-0.49591	539.463	-11.1135	539.463	1.22336	539.463	12.2236	539.463	33.1567
	421.576	1325.12	540.415	12.6321	540.415	1.60466	540.415	0.55612	540.415	-0.34639	540.415	6.03012	540.415	8.07524	540.415	9.66298	540.415	9.63016	540.415	2.27185	540.415	-0.7037	540.415	-10.5625	540.415	1.39229	540.415	14.8402	540.415	32.5578
	422.058	1251.31	541.366	15.1124	541.366	2.18098	541.366	0.92331	541.366	-0.18625	541.366	6.32395	541.366	8.1358	541.366	9.8165	541.366	9.50009	541.366	2.32051	541.366	-0.81455	541.366	-9.91579	541.366	1.59991	541.366	17.5937	541.366	31.9215
	422.54	1178.15	542.317	17.7031	542.317	2.75362	542.317	1.42957	542.317	0.04751	542.317	6.62008	542.317	8.29258	542.317	10.0705	542.317	9.45363	542.317	2.41445	542.317	-0.8469	542.317	-9.17377	542.317	1.81673	542.317	20.4283	542.317	31.2789
	423.022	1105.87	543.268	20.3716	543.268	3.30203	543.268	1.9986	543.268	0.34021	543.268	6.88559	543.268	8.51829	543.268	10.4239	543.268	9.49009	543.268	2.53606	543.268	-0.82769	543.268	-8.3389	543.268	1.98672	543.268	23.2765	543.268	30.6313
	423.504	1034.85	544.219	23.0878	544.219	3.81498	544.219	2.60502	544.219	0.67486	544.219	7.07292	544.219	8.80703	544.219	10.9758	544.219	9.60413	544.219	2.66972	544.219	-0.75732	544.219	-7.42399	544.219	2.14502	544.219	26.0919	544.219	29.9905
	423.986	965.594	545.171	25.8264	545.171	4.2822	545.171	3.25894	545.171	1.03578	545.171	7.16728	545.171	9.13437	545.171	11.5304	545.171	9.59595	545.171	2.80369	545.171	-0.64059	545.171	-6.44371	545.171	2.29688	545.171	28.8267	545.171	29.3712
	424.469	898.494	546.122	28.567	546.122	4.68911	546.122	3.96339	546.122	1.40925	546.122	7.17408	546.122	9.46145	546.122	12.1035	546.122	9.66101	546.122	2.92605	546.122	-0.48634	546.122	-5.41842	546.122	2.4336	546.122	31.4372	546.122	28.7725
	424.951	833.64	547.073	31.2801	547.073	5.02855	547.073	4.70317	547.073	1.78264	547.073	7.07174	547.073	9.76973	547.073	12.6779	547.073	9.76748	547.073	3.02671	547.073	-0.30743	547.073	-4.35633	547.073	2.54699	547.073	33.8953	547.073	28.1924
	425.433	771.301	548.024	33.9454	548.024	5.29441	548.024	5.47653	548.024	2.14908	548.024	6.916	548.024	10.0222	548.024	13.2093	548.024	9.82161	548.024	3.09662	548.024	-0.11792	548.024	-3.26297	548.024	2.62898	548.024	36.1605	548.024	27.6224
	425.915	711.765	548.976	36.547	548.976	5.53271	548.976	6.2807	548.976	2.50365	548.976	6.71291	548.976	10.2234	548.976	13.3974	548.976	9.85984	548.976	3.13352	548.976	0.05721	548.976	-2.79824	548.976	2.68703	548.976	38.2064	548.976	27.0823
	426.397	655.385	549.927	39.0699	549.927	5.72396	549.927	7.10577	549.927	2.83934	549.927	6.45092	549.927	10.3659	549.927	13.3602	549.927	9.70573	549.927	3.14038	549.927	0.21584	549.927	-2.70309	549.927	2.71285	549.927	40.0129	549.927	26.5713
	426.879	602.001	550.878	41.4998	550.878	5.84298	550.878	7.92864	550.878	3.15265	550.878	6.12615	550.878	10.4964	550.878	13.1871	550.878	9.2677	550.878	3.12364	550.878	0.36667	550.878	-2.59108	550.878	2.69738	550.878	41.5626	550.878	26.0358
	427.361	551.095	551.829	43.8316	551.829	5.90198	551.829	8.74638	551.829	3.43953	551.829	5.92187	551.829	10.5585	551.829	12.8268	551.829	8.62921	551.829	3.06063	551.829	0.48055	551.829	-2.46477	551.829	2.66692	551.829	42.8406	551.829	25.432
	427.843	502.154	552.781	46.0695	552.781	5.91676	552.781	9.55922	552.781	3.69523	552.781	5.95705	552.781	10.5353	552.781	12.1023	552.781	8.04658	552.781	2.5269	552.781	0.03838	552.781	-2.33603	552.781	2.61017	552.781	43.8382	552.781	24.7802
	428.325	455.466	553.732	48.2164	553.732	5.90753	553.732	10.3725	553.732	3.92116	553.732	5.93636	553.732	10.4577	553.732	10.9839	553.732	7.41106	553.732	1.97186	553.732	-0.4118	553.732	-2.1991	553.732	2.54365	553.732	44.5556	553.732	24.0805
	428.808	412.446	554.683	50.2782	554.683	5.89257	554.683	11.2075	554.683	4.11083	554.683	5.8571	554.683	10.3615	554.683	9.62991	554.683	6.70095	554.683	1.40886	554.683	-0.87163	554.683	-2.04661	554.683	2.47489	554.683	44.9975	554.683	23.3372
	429.29	374.097	555.634	52.2637	555.634	5.88828	555.634	12.0574	555.634	4.25063	555.634	5.74008	555.634	10.2676	555.634	8.20232	555.634	5.72786	555.634	0.8512	555.634	-1.33667	555.634	-1.87114	555.634	2.39568	555.634	45.1684	555.634	22.5608
	429.772	339.658	556.585	54.1898	556.585	5.90981	556.585	12.926	556.585	4.35145	556.585	5.5976	556.585	10.1742	556.585	6.81221	556.585	4.56566	556.585	0.27702	556.585	-1.79363	556.585	-1.67057	556.585	2.33681	556.585	45.0727	556.585	21.6932
	430.254	306.819	557.537	56.0678	557.537	5.97193	557.537	13.7999	557.537	4.43388	557.537	5.43292	557.537	10.1132	557.537	5.48619	557.537	3.90852	557.537	-0.31379	557.537	-2.23533	557.537	-1.43552	557.537	2.31888	557.537	44.7121	557.537	20.7679
	430.736	274.167	558.488	57.9071	558.488	6.08404	558.488	14.6653	558.488	4.52209	558.488	5.27039	558.488	10.1066	558.488	4.40437	558.488	3.19064	558.488	-0.92329	558.488	-2.65482	558.488	-1.15579	558.488	2.32572	558.488	44.09	558.488	19.8104
	431.218	242.897	559.439	59.7137	559.439	6.25072	559.439	15.4991	559.439	4.63547	559.439	5.12179	559.439	10.1685	559.439	3.46271	559.439	2.41436	559.439	-1.54298	559.439	-3.04835	559.439	-0.82171	559.439	2.3693	559.439	43.2126	559.439	18.8193
	431.7	215.153	560.39	61.4913	560.39	6.48027	560.39	16.2968	560.39	4.79006	560.39	5.01128	560.39	10.3201	560.39	2.71357	560.39	1.63439	560.39	-2.1545	560.39	-3.40202	560.39	-0.42665	560.39	2.47537	560.39	42.0872	560.39	17.8602
	432.182	191.275	561.341	63.239	561.341	6.78654	561.341	17.0853	561.341	4.99757	561.341	4.95137	561.341	10.5636	561.341	2.19327	561.341	0.90085	561.341	-2.74561	561.341	-3.70195	561.341	0.05073	561.341	2.59478	561.341	40.7146	561.341	16.8982
	432.664	169.954	562.293	64.9617	562.293	7.18417	562.293	17.8745	562.293	5.25995	562.293	4.9746	562.293	10.9322	562.293	1.78706	562.293	0.19563	562.293	-3.30077	562.293	-3.9396	562.293	0.63368	562.293	2.82314	562.293	39.0992	562.293	15.9545
	433.147	149.214	563.244	66.6548	563.244	7.69225	563.244	18.6811	563.244	5.57544	563.244	5.1017	563.244	11.4634	563.244	1.50311	563.244	-0.26748	563.244	-3.80589	563.244	-4.10512	563.244	1.34128	563.244	3.20173	563.244	37.2522	563.244	15.0529
	433.629	129.351	564.195	68.3183	564.195	8.32737	564.195	19.5289	564.195	5.94852	564.195	5.35208	564.195	12.1771	564.195	1.39289	564.195	-0.65431	564.195	-4.24735	564.195	-4.18919	564.195	2.18847	564.195	3.76221	564.195	35.1916	564.195	14.1569
	434.111	111.019	565.146	69.9505	565.146	9.09752	565.146	20.4764	565.146	6.391	565.146	5.76516	565.146	13.0883	565.146	1.46189	565.146	-0.77114	565.146	-4.61117	565.146	-4.18202	565.146	3.18853	565.146	4.56036	565.146	32.9461	565.146	13.2619
	434.593	95.0059	566.098	71.5538	566.098	10.0155	566.098	21.5193	566.098	6.91955	566.098	6.37083	566.098	14.1876	566.098	1.6831	566.098	-0.23612	566.098	-4.88421	566.098	-4.0749	566.098	4.3601	566.098	5.61077	566.098	30.544	566.098	12.368
	435.075	81.42	567.049	73.1326	567.049	11.0896	567.049	22.6508	567.049	7.54942	567.049	7.17898	567.049	15.4532	567.049	2.15927	567.049	0.5426	567.049	-5.05508	567.049	-3.85396	567.049	5.71289	567.049	6.93247	567.049	28.0231	567.049	11.4511
	435.557	69.8211	568	74.697	568	12.3211	568	23.8765	568	8.29666	568	8.20552	568	16.8821	568	2.83782	568	1.71081	568	-5.11344	568	-3.49094	568	7.25712	568	8.53252	568	25.4319	568	10.5025
	436.039	59.6231	568.951	76.2564	568.951	13.7107	568.951	25.2159	568.951	9.1751	568.951	9.45679	568.951	18.4652	568.951	3.70434	568.951	3.02047	568.951	-5.04976	568.951	-2.97126	568.951	8.99603	568.951	10.4077	568.951	22.8097	568.951	9.52446
	436.521	49.4943	569.902	77.8184	569.902	15.251	569.902	26.6631	569.902	10.1977	569.902	10.9223	569.902	20.1813	569.902	4.75623	569.902	4.46565	569.902	-4.8545	569.902	-2.30264	569.902	10.9239	569.902	12.5861	569.902	20.195	569.902	8.51677
	437.003	39.9048	570.854	79.404	570.854	16.9396	570.854	28.2219	570.854	11.379	570.854	12.6221	570.854	22.0169	570.854	5.99688	570.854	6.24363	570.854	-4.5148	570.854	-1.50005	570.854	13.034	570.854	15.0257	570.854	17.6351	570.854	7.47881
	437.486	31.7208	571.805	81.0295	571.805	18.7725	571.805	29.9016	571.805	12.7287	571.805	14.5266	571.805	23.9697	571.805	7.59406	571.805	8.14568	571.805	-4.02258	571.805	-0.5728	571.805	15.3261	571.805	17.7082	571.805	15.172	571.805	6.42191
	437.968	26.0949	572.756	82.7099	572.756	20.7484	572.756	31.7035	572.756	14.2574	572.756	16.6499	572.756	26.0527	572.756	9.44948	572.756	10.2462	572.756	-3.36726	572.756	0.47381	572.756	17.805	572.756	20.5972	572.756	12.8513	572.756	5.37783
	438.45	22.3808	573.707	84.4629	573.707	22.8674	573.707	33.6133	573.707	15.977	573.707	19.0176	573.707	28.2519	573.707	11.7077	573.707	12.3957	573.707	-2.53772	573.707	1.63719	573.707	20.4787	573.707	23.6627	573.707	10.7324	573.707	4.36142
	438.932	19.7483	574.659	86.3936	574.659	25.1273	574.659	35.6005	574.659	17.8946	574.659	21.6233	574.659	30.5735	574.659	14.369	574.659	14.5428	574.659	-1.52863	574.659	2.91634	574.659	23.3531	574.659	26.8959	574.659	8.86312	574.659	3.38184
	439.414	17.666	575.61	88.5011	575.61	27.53	575.61	37.6758	575.61	20.0148	575.61	24.4415	575.61	33.0232	575.61	17.1762	575.61	16.8345	575.61	-0.3418	575.61	4.30941	575.61	26.4355	575.61	30.2942	575.61	7.28788	575.61	2.46161
	439.896	16.4942	576.561	90.7476	576.561	30.0735	576.561	39.8515	576.561	22.3326	576.561	27.4549	576.561	35.6099	576.561	20.2534	576.561	19.5081	576.561	1.01301	576.561	5.81989	576.561	29.7353	576.561	33.852	576.561	6.03802	576.561	1.62562
	440.378	16.4315	577.512	93.1297	577.512	32.7577	577.512	42.13	577.512	24.8449	577.512	30.6547	577.512	38.3583	577.512	23.487	577.512	22.2084	577.512	2.50982	577.512	7.44113	577.512	33.2697	577.512	37.551	577.512	5.12851	577.512	0.90099
	440.86	16.9024	578.463	95.6318	578.463	35.5813	578.463	44.5102	578.463	27.5497	578.463	34.0172	578.463	41.2721	578.463	26.8485	578.463	25.0046	578.463	4.12183	578.463	9.14881	578.463	37.0477	578.463	41.3851	578.463	4.56864	578.463	0.3225
	441.343	18.4682	579.415	98.2416	579.415	38.5419	579.415	46.979	579.415	30.4525	579.415	37.5314	579.415	44.3672	579.415	30.3131	579.415	27.9155	579.415	5.85082	579.415	10.9631	579.415	41.0352	579.415	45.3359	579.415	4.36995	579.415	-0.08688
	441.825	21.5873	580.366	100.976	580.366	41.6362	580.366	49.5367	580.366	33.5712	580.366	41.173	580.366	47.6528	580.366	33.8689	580.366	30.5822	580.366	7.69276	580.366	12.888	580.366	45.2338	580.366	49.391	580.366	4.54529	580.366	-0.32612
	442.307	26.1907	581.317	103.833	581.317	44.8634	581.317	52.1613	581.317	36.8986	581.317	44.9192	581.317	51.0837	581.317	37.3869	581.317	33.375	581.317	9.63822	581.317	14.9199	581.317	49.6596	581.317	53.536	581.317	5.10642	581.317	-0.37026
	442.789	31.9241	582.268	106.807	582.268	48.2182	582.268	54.8403	582.268	40.4245	582.268	48.7976	582.268	54.6745	582.268	40.9462	582.268	36.0501	582.268	11.6766	582.268	17.0714	582.268	54.3179	582.268	57.7515	582.268	6.05733	582.268	-0.19701
	443.271	38.4574	583.219	109.878	583.219	51.6898	583.219	57.5672	583.219	44.1348	583.219	52.8024	583.219	58.4431	583.219	44.5164	583.219	38.6504	583.219	13.7997	583.219	19.3396	583.219	59.2261	583.219	62.026	583.219	7.34844	583.219	0.22794
	443.753	45.3629	584.171	113.01	584.171	55.2658	584.171	60.3283	584.171	47.9973	584.171	57.0216	584.171	62.3875	584.171	48.0416	584.171	41.2812	584.171	15.9966	584.171	21.7191	584.171	64.4544	584.171	66.3375	584.171	8.93622	584.171	0.89211
	444.235	52.1531	585.122	116.148	585.122	58.9346	585.122	63.1239	585.122	51.9856	585.122	61.4677	585.122	66.5015	585.122	51.4851	585.122	43.9448	585.122	18.2645	585.122	24.2036	585.122	70.0497	585.122	70.6812	585.122	10.7803	585.122	1.77663
	444.717	58.8398	586.073	119.255	586.073	62.6784	586.073	65.9358	586.073	56.0604	586.073	66.0384	586.073	70.7666	586.073	54.7707	586.073	46.8423	586.073	20.6007	586.073	26.7851	586.073	76.1704	586.073	75.0596	586.073	12.8458	586.073	2.87023
	445.2	65.8829	587.024	122.359	587.024	66.4638	587.024	68.7633	587.024	60.1783	587.024	70.7028	587.024	75.1485	587.024	57.9172	587.024	49.4894	587.024	23.0021	587.024	29.4531	587.024	82.7006	587.024	79.4631	587.024	15.1055	587.024	4.15893
	445.682	73.5238	587.976	125.437	587.976	70.2636	587.976	71.5944	587.976	64.2803	587.976	75.4329	587.976	79.6228	587.976	60.8897	587.976	51.833	587.976	25.4592	587.976	32.1964	587.976	89.3035	587.976	83.8661	587.976	17.5155	587.976	5.6257
	446.164	81.5207	588.927	128.454	588.927	74.045	588.927	74.3992	588.927	68.3537	588.927	80.1925	588.927	84.165	588.927	63.6327	588.927	54.0391	588.927	27.9608	588.927	35.0061	588.927	96.0543	588.927	88.2407	588.927	20.0475	588.927	7.3036
	446.646	89.5889	589.878	131.373	589.878	77.7796	589.878	77.2028	589.878	72.3855	589.878	84.9776	589.878	88.7273	589.878	66.0683	589.878	56.5381	589.878	30.4962	589.878	37.8715	589.878	103.121	589.878	92.5777	589.878	22.6796	589.878	9.20305
	447.128	98.0075	590.829	134.169	590.829	81.4511	590.829	79.9875	590.829	76.355	590.829	89.7839	590.829	93.2829	590.829	68.2633	590.829	58.553	590.829	33.0852	590.829	40.7814	590.829	110.569	590.829	96.8827	590.829	25.3875	590.829	11.3125
	447.61	107.087	591.781	136.821	591.781	85.0419	591.781	82.7255	591.781	80.2448	591.781	94.5883	591.781	97.8043	591.781	70.2981	591.781	60.5447	591.781	35.7512	591.781	43.7481	591.781	118.396	591.781	101.201	591.781	28.1478	591.781	13.6117
	448.092	117.501	592.732	139.313	592.732	88.5359	592.732	85.3755	592.732	84.0445	592.732	99.3759	592.732	102.247	592.732	72.1722	592.732	62.5621	592.732	38.508	592.732	46.7634	592.732	126.533	592.732	105.488	592.732	30.9262	592.732	16.0836
	448.574	128.118	593.683	141.641	593.683	91.9168	593.683	87.871	593.683	87.7411	593.683	104.073	593.683	106.629	593.683	73.8148	593.683	64.2982	593.683	41.3544	593.683	49.8096	593.683	134.929	593.683	109.737	593.683	33.6929	593.683	18.7169
	449.056	139.144	594.634	143.74	594.634	95.1733	594.634	90.188	594.634	91.3236	594.634	108.623	594.634	110.855	594.634	75.5727	594.634	65.9027	594.634	44.2917	594.634	52.8781	594.634	143.451	594.634	113.915	594.634	36.4158	594.634	21.4809
	449.538	150.244	595.585	145.687	595.585	98.2958	595.585	92.3086	595.585	94.7801	595.585	112.987	595.585	114.908	595.585	77.4373	595.585	67.5998	595.585	47.2806	595.585	55.9722	595.585	152.07	595.585	118.015	595.585	39.056	595.585	24.3519
	450.021	160.966	596.537	147.555	596.537	101.278	596.537	94.2054	596.537	98.1074	596.537	117.106	596.537	118.811	596.537	79.5323	596.537	69.3024	596.537	50.3009	596.537	59.0975	596.537	160.758	596.537	122.027	596.537	41.5921	596.537	27.3037
	450.503	171.49	597.488	149.374	597.488	104.114	597.488	95.8691	597.488	101.3	597.488	120.955	597.488	122.544	597.488	81.9694	597.488	71.0759	597.488	53.367	597.488	62.2624	597.488	169.459	597.488	125.909	597.488	44.0018	597.488	30.3051
	450.985	181.844	598.439	151.21	598.439	106.8	598.439	97.3046	598.439	104.307	598.439	124.569	598.439	126.092	598.439	84.8861	598.439	73.2597	598.439	56.4446	598.439	65.4462	598.439	178.305	598.439	129.654	598.439	46.2605	598.439	33.3341
	451.467	192.265	599.39	153.062	599.39	109.334	599.39	98.5181	599.39	107.231	599.39	127.945	599.39	129.468	599.39	88.2134	599.39	75.8675	599.39	59.5376	599.39	68.6372	599.39	187.179	599.39	133.268	599.39	48.3444	599.39	36.3809
	451.949	202.696	600.341	154.945	600.341	111.72	600.341	99.5217	600.341	110.091	600.341	131.043	600.341	132.686	600.341	91.882	600.341	78.3093	600.341	62.6456	600.341	71.8448	600.341	196.057	600.341	136.745	600.341	50.2336	600.341	39.4403
	452.431	212.609	601.293	156.847	601.293	113.965	601.293	100.326	601.293	112.892	601.293	133.869	601.293	135.782	601.293	95.8678	601.293	80.6267	601.293	65.7488	601.293	75.0766	601.293	204.944	601.293	140.103	601.293	51.9071	601.293	42.4626
	452.913	221.104	602.244	158.734	602.244	116.069	602.244	100.948	602.244	115.65	602.244	136.46	602.244	138.768	602.244	100.128	602.244	83.0429	602.244	68.8089	602.244	78.3345	602.244	213.818	602.244	143.341	602.244	53.342	602.244	45.4239
	453.396	228.138	603.195	160.592	603.195	118.046	603.195	101.477	603.195	118.404	603.195	138.809	603.195	141.664	603.195	104.612	603.195	86.2071	603.195	71.8875	603.195	81.5757	603.195	222.684	603.195	146.471	603.195	54.5003	603.195	48.2799
	453.878	233.599	604.146	162.467	604.146	119.915	604.146	101.94	604.146	121.189	604.146	140.947	604.146	144.498	604.146	109.332	604.146	90.0629	604.146	75.0102	604.146	84.8134	604.146	231.562	604.146	149.497	604.146	55.3526	604.146	50.9694
	454.36	237.745	605.098	164.365	605.098	121.712	605.098	102.355	605.098	124.032	605.098	142.899	605.098	147.321	605.098	114.188	605.098	94.1823	605.098	78.1981	605.098	88.0546	605.098	240.497	605.098	152.42	605.098	55.8862	605.098	53.4648
	454.842	242.197	606.049	166.297	606.049	123.47	606.049	102.755	606.049	126.96	606.049	144.733	606.049	150.167	606.049	119.166	606.049	98.5034	606.049	81.4643	606.049	91.3111	606.049	249.541	606.049	155.267	606.049	56.0987	606.049	55.7508
	455.324	249.632	607	168.287	607	125.22	607	103.175	607	129.996	607	146.511	607	153.083	607	124.223	607	103.106	607	84.8717	607	94.6003	607	258.753	607	158.123	607	55.9937	607	57.8237
	455.806	259.689	607.951	170.366	607.951	127.004	607.951	103.67	607.951	133.169	607.951	148.311	607.951	156.12	607.951	129.15	607.951	108.563	607.951	88.3767	607.951	97.955	607.951	268.202	607.951	161.042	607.951	55.5787	607.951	59.6818
	456.288	268.978	608.902	172.571	608.902	128.851	608.902	104.235	608.902	136.512	608.902	150.196	608.902	159.32	608.902	134	608.902	113.51	608.902	92.0117	608.902	101.408	608.902	277.857	608.902	164.039	608.902	54.8686	608.902	61.3058
	456.77	274.911	609.854	174.936	609.854	130.78	609.854	104.87	609.854	140.054	609.854	152.226	609.854	162.713	609.854	138.721	609.854	117.48	609.854	95.7979	609.854	104.985	609.854	287.827	609.854	167.213	609.854	53.8945	609.854	62.7212
	457.252	277.979	610.805	177.483	610.805	132.806	610.805	105.584	610.805	143.824	610.805	154.421	610.805	166.317	610.805	143.273	610.805	120.813	610.805	99.7559	610.805	108.716	610.805	298.298	610.805	170.539	610.805	52.6878	610.805	63.9364
	457.735	280.339	611.756	180.247	611.756	134.928	611.756	106.379	611.756	147.86	611.756	156.802	611.756	170.152	611.756	147.622	611.756	123.705	611.756	103.925	611.756	112.633	611.756	309.503	611.756	174.067	611.756	51.2707	611.756	64.9478
	458.217	282.18	612.707	183.254	612.707	137.159	612.707	107.254	612.707	152.158	612.707	159.404	612.707	174.205	612.707	151.642	612.707	123.717	612.707	108.311	612.707	116.802	612.707	321.662	612.707	177.85	612.707	49.6587	612.707	65.7723
	458.699	283.051	613.659	186.52	613.659	139.508	613.659	108.193	613.659	156.727	613.659	162.231	613.659	178.495	613.659	155.315	613.659	125.081	613.659	112.924	613.659	121.242	613.659	335.052	613.659	181.904	613.659	47.879	613.659	66.4214
	459.181	282.454	614.61	190.055	614.61	141.988	614.61	109.187	614.61	161.587	614.61	165.273	614.61	183.035	614.61	158.619	614.61	126.149	614.61	117.77	614.61	126.009	614.61	349.761	614.61	186.294	614.61	45.9644	614.61	66.9041
	459.663	280.82	615.561	193.873	615.561	144.608	615.561	110.235	615.561	166.763	615.561	168.535	615.561	187.841	615.561	161.655	615.561	126.517	615.561	122.861	615.561	131.142	615.561	365.838	615.561	191.069	615.561	43.9524	615.561	67.2566
	460.145	278.914	616.512	198.012	616.512	147.377	616.512	111.33	616.512	172.267	616.512	172.015	616.512	192.901	616.512	164.549	616.512	126.245	616.512	128.238	616.512	136.59	616.512	383.446	616.512	196.246	616.512	41.8819	616.512	67.5141
	460.627	276.97	617.463	202.54	617.463	150.318	617.463	112.444	617.463	178.12	617.463	175.678	617.463	198.19	617.463	166.941	617.463	125.799	617.463	133.997	617.463	142.369	617.463	402.533	617.463	201.993	617.463	39.7879	617.463	67.7106
	461.109	274.513	618.415	207.429	618.415	153.421	618.415	113.579	618.415	184.309	618.415	179.543	618.415	203.708	618.415	168.444	618.415	126.129	618.415	140.175	618.415	148.433	618.415	423.148	618.415	208.499	618.415	37.7069	618.415	67.8439
	461.591	270.809	619.366	212.603	619.366	156.662	619.366	114.723	619.366	190.805	619.366	183.562	619.366	209.403	619.366	169.458	619.366	127.303	619.366	146.896	619.366	154.781	619.366	445.18	619.366	215.776	619.366	35.6634	619.366	67.9361
	462.074	266.074	620.317	217.987	620.317	160.009	620.317	115.855	620.317	197.536	620.317	187.733	620.317	215.206	620.317	170.571	620.317	129.177	620.317	154.214	620.317	161.443	620.317	468.469	620.317	223.708	620.317	33.6865	620.317	68.0127
	462.556	261.743	621.268	223.562	621.268	163.418	621.268	116.953	621.268	204.343	621.268	192.019	621.268	221.082	621.268	172.483	621.268	131.416	621.268	161.902	621.268	168.464	621.268	492.968	621.268	232.24	621.268	31.8035	621.268	68.0824
	463.038	258.664	622.219	229.25	622.219	166.828	622.219	117.986	622.219	211.142	622.219	196.341	622.219	226.954	622.219	175.327	622.219	133.043	622.219	169.881	622.219	175.799	622.219	518.782	622.219	241.303	622.219	30.0322	622.219	68.1172
	463.52	255.82	623.171	234.974	623.171	170.202	623.171	118.955	623.171	217.849	623.171	200.603	623.171	232.768	623.171	178.482	623.171	134.987	623.171	178.122	623.171	183.383	623.171	545.644	623.171	250.779	623.171	28.3469	623.171	68.1109
	464.002	251.338	624.122	240.654	624.122	173.493	624.122	119.841	624.122	224.376	624.122	204.759	624.122	238.46	624.122	182.062	624.122	137.823	624.122	186.554	624.122	191.162	624.122	573.251	624.122	260.546	624.122	26.731	624.122	68.0619
	464.484	244.817	625.073	246.207	625.073	176.653	625.073	120.628	625.073	230.639	625.073	208.769	625.073	243.955	625.073	186.121	625.073	141.347	625.073	195.082	625.073	199.083	625.073	601.27	625.073	270.468	625.073	25.1772	625.073	67.9797
	464.966	236.921	626.024	251.547	626.024	179.63	626.024	121.302	626.024	236.544	626.024	212.567	626.024	249.165	626.024	190.659	626.024	144.888	626.024	203.629	626.024	207.097	626.024	629.328	626.024	280.403	626.024	23.6767	626.024	67.8832
	465.448	228.385	626.976	256.53	626.976	182.378	626.976	121.838	626.976	242.031	626.976	216.101	626.976	253.982	626.976	195.719	626.976	152.153	626.976	212.125	626.976	215.151	626.976	657.136	626.976	290.231	626.976	22.2001	626.976	67.7563
	465.93	219.277	627.927	261.114	627.927	184.827	627.927	122.214	627.927	246.931	627.927	219.272	627.927	258.313	627.927	201.562	627.927	158.413	627.927	220.467	627.927	223.156	627.927	684.361	627.927	299.822	627.927	20.7665	627.927	67.5709
	466.413	209.911	628.878	265.184	628.878	186.916	628.878	122.397	628.878	251.176	628.878	222.002	628.878	262.031	628.878	208.164	628.878	164.461	628.878	228.508	628.878	230.99	628.878	710.668	628.878	309.036	628.878	19.3909	628.878	67.323
	466.895	200.489	629.829	268.594	629.829	188.591	629.829	122.38	629.829	254.767	629.829	224.236	629.829	265.085	629.829	215.299	629.829	170.722	629.829	236.11	629.829	238.523	629.829	735.689	629.829	317.739	629.829	18.0791	629.829	66.9786
	467.377	191.075	630.781	271.158	630.781	189.812	630.781	122.141	630.781	257.658	630.781	225.931	630.781	267.46	630.781	222.541	630.781	177.34	630.781	243.215	630.781	245.654	630.781	758.966	630.781	325.798	630.781	16.8229	630.781	66.468
	467.859	181.794	631.732	272.861	631.732	190.54	631.732	121.66	631.732	259.784	631.732	227.013	631.732	269.088	631.732	229.446	631.732	183.653	631.732	249.754	631.732	252.266	631.732	780.392	631.732	333.133	631.732	15.6175	631.732	65.914
	468.341	172.594	632.683	273.642	632.683	190.742	632.683	120.95	632.683	261.107	632.683	227.433	632.683	269.922	632.683	235.503	632.683	190.048	632.683	255.638	632.683	258.257	632.683	799.668	632.683	339.654	632.683	14.468	632.683	65.3093
	468.823	163.31	633.634	273.493	633.634	190.393	633.634	119.984	633.634	261.582	633.634	227.154	633.634	269.92	633.634	241.035	633.634	196.113	633.634	260.793	633.634	263.54	633.634	816.518	633.634	345.258	633.634	13.3792	633.634	64.647
	469.305	153.87	634.585	272.404	634.585	189.477	634.585	118.746	634.585	261.179	634.585	226.159	634.585	269.053	634.585	246.108	634.585	201.659	634.585	265.164	634.585	268.042	634.585	830.536	634.585	349.846	634.585	12.3586	634.585	63.927
	469.787	144.168	635.537	270.372	635.537	187.987	635.537	117.233	635.537	259.88	635.537	224.422	635.537	267.298	635.537	250.513	635.537	206.723	635.537	268.716	635.537	271.698	635.537	841.587	635.537	353.354	635.537	11.4184	635.537	63.17
	470.27	134.317	636.488	267.41	636.488	185.911	636.488	115.41	636.488	257.668	636.488	221.919	636.488	264.66	636.488	254.263	636.488	211.461	636.488	271.406	636.488	274.338	636.488	849.85	636.488	355.711	636.488	10.5662	636.488	62.3444
	470.752	124.801	637.439	263.555	637.439	183.251	637.439	113.273	637.439	254.537	637.439	218.66	637.439	261.097	637.439	257.489	637.439	214.024	637.439	273.212	637.439	276.003	637.439	855.216	637.439	356.876	637.439	9.79645	637.439	61.4123
	471.234	116.241	638.39	258.855	638.39	180.016	638.39	110.762	638.39	250.499	638.39	214.654	638.39	256.611	638.39	259.971	638.39	216.172	638.39	274.124	638.39	276.707	638.39	857.461	638.39	356.823	638.39	9.09821	638.39	60.3567
	471.716	108.697	639.341	253.368	639.341	176.217	639.341	107.858	639.341	245.573	639.341	209.93	639.341	251.212	639.341	261.602	639.341	217.951	639.341	274.111	639.341	276.439	639.341	856.434	639.341	355.531	639.341	8.5061	639.341	59.1668
	472.198	101.979	640.293	247.178	640.293	171.871	640.293	104.554	640.293	239.779	640.293	204.504	640.293	244.926	640.293	262.396	640.293	217.092	640.293	273.142	640.293	275.185	640.293	852.067	640.293	352.975	640.293	8.00384	640.293	57.8313
	472.68	95.3144	641.244	240.355	641.244	166.997	641.244	100.852	641.244	233.143	641.244	198.376	641.244	237.796	641.244	260.827	641.244	213.854	641.244	271.183	641.244	272.928	641.244	844.357	641.244	349.16	641.244	7.57355	641.244	56.3132
	473.162	89.5392	642.195	232.96	642.195	161.626	642.195	96.7984	642.195	225.711	642.195	191.614	642.195	229.808	642.195	258.7	642.195	209.111	642.195	268.224	642.195	269.683	642.195	833.326	642.195	344.086	642.195	7.20365	642.195	54.6461
	473.644	84.1874	643.146	225.134	643.146	155.79	643.146	92.4169	643.146	217.535	643.146	184.273	643.146	221.079	643.146	255.12	643.146	202.895	643.146	264.254	643.146	265.467	643.146	819.128	643.146	337.786	643.146	6.88482	643.146	52.8874
	474.127	79.1998	644.098	216.897	644.098	149.526	644.098	87.7551	644.098	208.679	644.098	176.406	644.098	211.675	644.098	249.223	644.098	195.068	644.098	259.316	644.098	260.281	644.098	801.861	644.098	330.286	644.098	6.60845	644.098	51.0742
	474.609	74.6002	645.049	208.246	645.049	142.876	645.049	82.8585	645.049	199.21	645.049	168.071	645.049	201.668	645.049	240.121	645.049	185.171	645.049	253.447	645.049	254.138	645.049	781.66	645.049	321.632	645.049	6.36158	645.049	49.192
	475.091	69.8451	646	199.212	646	135.88	646	77.7731	646	189.205	646	159.336	646	191.134	646	228.519	646	175.385	646	246.659	646	247.066	646	758.728	646	311.892	646	6.12716	646	47.325
	475.573	64.8512	646.951	189.702	646.951	128.59	646.951	72.545	646.951	178.796	646.951	150.197	646.951	180.17	646.951	216.419	646.951	166.564	646.951	239.02	646.951	239.122	646.951	733.09	646.951	301.138	646.951	5.89145	646.951	45.4308
	476.055	59.8115	647.902	179.779	647.902	121.063	647.902	67.2321	647.902	168.006	647.902	140.691	647.902	168.859	647.902	204.146	647.902	158.218	647.902	230.578	647.902	230.367	647.902	705.037	647.902	289.45	647.902	5.64877	647.902	43.4931
	476.537	55.0187	648.854	169.527	648.854	113.358	648.854	61.8921	648.854	156.94	648.854	130.897	648.854	157.288	648.854	191.869	648.854	149.85	648.854	221.395	648.854	220.871	648.854	674.829	648.854	276.922	648.854	5.39959	648.854	41.5101
	477.019	50.7194	649.805	159.007	649.805	105.537	649.805	56.5871	649.805	145.709	649.805	120.907	649.805	145.554	649.805	179.624	649.805	141.008	649.805	211.56	649.805	210.704	649.805	642.755	649.805	263.669	649.805	5.14579	649.805	39.4867
	477.501	47.5818	650.756	148.317	650.756	97.6681	650.756	51.3871	650.756	134.411	650.756	110.823	650.756	133.756	650.756	167.424	650.756	132.386	650.756	201.205	650.756	199.918	650.756	609.082	650.756	249.794	650.756	4.88847	650.756	37.5229
	477.983	45.6481	651.707	137.563	651.707	89.8207	651.707	46.2878	651.707	123.141	651.707	100.769	651.707	122.004	651.707	155.365	651.707	124.347	651.707	190.356	651.707	188.634	651.707	574.116	651.707	235.396	651.707	4.655	651.707	35.5832
	478.466	44.7211	652.659	126.796	652.659	82.0639	652.659	41.3199	652.659	111.985	652.659	90.8381	652.659	110.407	652.659	143.641	652.659	116.796	652.659	179.066	652.659	176.939	652.659	538.206	652.659	220.614	652.659	4.46852	652.659	33.7044
	478.948	44.7786	653.61	116.101	653.61	74.4522	653.61	36.5174	653.61	101.043	653.61	81.1286	653.61	99.0601	653.61	132.38	653.61	110.171	653.61	167.432	653.61	164.943	653.61	501.708	653.61	205.592	653.61	4.34243	653.61	31.9158
	479.43	45.3552	654.561	105.57	654.561	67.0357	654.561	31.9154	654.561	90.4695	654.561	71.7272	654.561	88.0463	654.561	121.63	654.561	105.934	654.561	155.553	654.561	152.773	654.561	464.978	654.561	190.475	654.561	4.28097	654.561	30.2051
	479.912	45.5573	655.512	95.2413	655.512	59.8635	655.512	27.5111	655.512	80.2614	655.512	62.6623	655.512	77.4254	655.512	117.025	655.512	100.509	655.512	143.478	655.512	140.523	655.512	428.376	655.512	175.328	655.512	4.34658	655.512	28.6433
	480.394	45.0377	656.463	85.1943	656.463	52.9692	656.463	23.2943	656.463	70.434	656.463	54.0044	656.463	67.2925	656.463	110.696	656.463	94.9153	656.463	131.374	656.463	128.307	656.463	392.292	656.463	160.305	656.463	4.56113	656.463	27.2542
	480.876	44.5564	657.415	75.494	657.415	46.3906	657.415	19.2833	657.415	61.0369	657.415	45.7792	657.415	57.7123	657.415	103.982	657.415	89.1628	657.415	119.331	657.415	116.221	657.415	357.252	657.415	145.557	657.415	4.93281	657.415	26.0558
	481.358	45.5103	658.366	66.2064	658.366	40.1619	658.366	15.5042	658.366	52.1356	658.366	38.0186	658.366	48.7251	658.366	97.9745	658.366	83.4397	658.366	107.455	658.366	104.368	658.366	323.68	658.366	131.267	658.366	5.46227	658.366	25.0564
	481.84	48.0371	659.317	57.3967	659.317	34.3168	659.317	12.0124	659.317	43.7823	659.317	30.8044	659.317	40.352	659.317	92.6851	659.317	78.3246	659.317	95.8493	659.317	92.8661	659.317	291.906	659.317	117.642	659.317	6.15392	659.317	24.2637
	482.322	52.1322	660.268	49.1157	660.268	28.8832	660.268	8.75881	660.268	36.0046	660.268	24.1991	660.268	32.642	660.268	87.982	660.268	73.5459	660.268	84.5971	660.268	81.8174	660.268	262.165	660.268	104.793	660.268	7.00514	660.268	23.7049
	482.805	57.673	661.219	41.4182	661.219	23.8894	661.219	5.74044	661.219	28.8526	661.219	18.2416	661.219	25.6573	661.219	83.6629	661.219	68.8452	661.219	73.8097	661.219	71.2574	661.219	234.647	661.219	92.8753	661.219	8.04535	661.219	23.4009
	483.287	65.0936	662.171	34.3551	662.171	19.367	662.171	2.98059	662.171	22.4043	662.171	12.9733	662.171	19.3855	662.171	79.8112	662.171	64.5242	662.171	63.5905	662.171	61.2851	662.171	209.445	662.171	82.0276	662.171	9.28655	662.171	23.355
	483.769	72.0321	663.122	27.9728	663.122	15.3393	663.122	0.50243	663.122	16.7184	663.122	8.40234	663.122	13.8183	663.122	76.4317	663.122	60.65	663.122	54.0522	663.122	51.9417	663.122	186.658	663.122	72.3599	663.122	10.736	663.122	23.5779
	484.251	78.2903	664.073	22.2923	664.073	11.8176	664.073	-1.67574	664.073	11.8188	664.073	4.50306	664.073	8.97881	664.073	73.4152	664.073	56.8993	664.073	45.3032	664.073	43.2352	664.073	166.212	664.073	63.9909	664.073	12.3974	664.073	24.0925
	484.733	84.7329	665.024	17.2201	665.024	8.79305	665.024	-3.51388	665.024	7.71273	665.024	1.29836	665.024	4.79856	665.024	70.8205	665.024	54.3221	665.024	37.4297	665.024	35.2788	665.024	148.056	665.024	56.9685	665.024	14.2352	665.024	24.847
	485.215	92.3294	665.976	12.6891	665.976	6.24021	665.976	-4.97246	665.976	4.34871	665.976	-1.22282	665.976	1.29421	665.976	68.4682	665.976	52.1441	665.976	30.3927	665.976	28.051	665.976	132.296	665.976	51.2737	665.976	16.2192	665.976	25.8408
	485.697	101.403	666.927	8.70016	666.927	4.75798	666.927	-6.02652	666.927	1.6783	666.927	-2.39533	666.927	-1.55529	666.927	66.3822	666.927	50.2935	666.927	24.2272	666.927	21.6253	666.927	118.863	666.927	46.5868	666.927	18.3299	666.927	27.0611
	486.179	112.234	667.878	5.28845	667.878	3.75655	667.878	-6.64013	667.878	-0.36377	667.878	-2.8528	667.878	-3.73493	667.878	64.5489	667.878	48.833	667.878	18.7849	667.878	16.032	667.878	107.79	667.878	42.7644	667.878	20.5475	667.878	28.4972
	486.661	124.694	668.829	2.49077	668.829	3.2019	668.829	-6.7727	668.829	-1.81954	668.829	-2.6473	668.829	-5.21638	668.829	62.899	668.829	48.0051	668.829	13.861	668.829	11.251	668.829	99.1206	668.829	39.8502	668.829	22.8526	668.829	30.1596
	487.144	137.469	669.781	0.33914	669.781	3.172	669.781	-6.42056	669.781	-2.63027	669.781	-1.76736	669.781	-5.58777	669.781	61.5336	669.781	47.3026	669.781	9.6232	669.781	7.21734	669.781	92.7117	669.781	37.8411	669.781	25.2365	669.781	31.9797
	487.626	149.207	670.732	-1.14278	670.732	3.73769	670.732	-5.5826	670.732	-2.80257	670.732	-0.16661	670.732	-4.62949	670.732	60.3826	670.732	47.1238	670.732	6.11459	670.732	3.94297	670.732	88.1774	670.732	36.7294	670.732	27.7085	670.732	34.0271
	488.108	159.748	671.683	-1.81056	671.683	4.91314	671.683	-4.17989	671.683	-1.33428	671.683	2.17294	671.683	-2.98897	671.683	59.4449	671.683	47.1685	671.683	3.32056	671.683	1.45145	671.683	85.3781	671.683	36.5476	671.683	30.1545	671.683	36.3123
	488.59	169.686	672.634	-1.62335	672.634	6.71407	672.634	-2.13436	672.634	1.5099	672.634	5.23995	672.634	-0.58359	672.634	58.7358	672.634	47.4526	672.634	1.2472	672.634	-0.2593	672.634	84.2648	672.634	37.3194	672.634	32.5254	672.634	38.8591
	489.072	179.501	673.585	-0.68537	673.585	9.18285	673.585	1.38293	673.585	4.946	673.585	9.01339	673.585	2.69129	673.585	58.2976	673.585	48.4472	673.585	-0.07751	673.585	-0.22264	673.585	84.8564	673.585	39.0514	673.585	34.9222	673.585	41.7191
	489.554	189.592	674.537	1.05305	674.537	12.4925	674.537	6.01383	674.537	9.02008	674.537	13.4913	674.537	6.94826	674.537	58.2927	674.537	49.2667	674.537	-0.51325	674.537	0.84532	674.537	86.8598	674.537	41.804	674.537	37.5677	674.537	44.9192
	490.036	200.442	675.488	5.91926	675.488	16.4866	675.488	11.2834	675.488	13.5949	675.488	18.6244	675.488	12.0288	675.488	58.6397	675.488	49.9031	675.488	0.01388	675.488	2.67238	675.488	90.1665	675.488	45.6155	675.488	40.7639	675.488	48.6074
	490.519	212.02	676.439	11.3972	676.439	21.0973	676.439	17.0954	676.439	18.7339	676.439	24.3621	676.439	17.8639	676.439	59.3577	676.439	50.4808	676.439	1.68393	676.439	5.28157	676.439	94.601	676.439	50.611	676.439	44.691	676.439	52.9173
	491.001	223.737	677.39	17.3117	677.39	26.2437	677.39	23.3776	677.39	24.3824	677.39	30.6379	677.39	24.4384	677.39	60.5065	677.39	51.1182	677.39	5.38365	677.39	8.66552	677.39	99.9899	677.39	56.8394	677.39	49.9965	677.39	58.089
	491.483	235.093	678.341	23.5862	678.341	31.8156	678.341	30.0542	678.341	30.3911	678.341	37.3678	678.341	31.7156	678.341	62.1934	678.341	51.9224	678.341	9.76354	678.341	12.7498	678.341	106.235	678.341	64.2195	678.341	57.5817	678.341	64.6642
	491.965	246.2	679.293	30.2244	679.293	37.6946	679.293	37.0462	679.293	36.6838	679.293	44.4488	679.293	39.4861	679.293	64.6023	679.293	53.3129	679.293	14.7135	679.293	17.3798	679.293	113.329	679.293	72.5083	679.293	67.2474	679.293	74.4365
	492.447	257.202	680.244	37.1029	680.244	43.7711	680.244	44.254	680.244	43.1733	680.244	51.7469	680.244	47.5873	680.244	67.6153	680.244	54.7577	680.244	20.0986	680.244	22.4963	680.244	120.966	680.244	81.4565	680.244	78.8129	680.244	85.6894
	492.929	268.178	681.195	44.1631	681.195	49.9399	681.195	51.5679	681.195	49.7529	681.195	59.153	681.195	55.8779	681.195	71.2698	681.195	56.3965	681.195	25.8165	681.195	27.9419	681.195	128.957	681.195	90.8487	681.195	92.0661	681.195	98.4582
	493.411	279.126	682.146	51.3263	682.146	56.1057	682.146	58.8907	682.146	56.3194	682.146	66.5569	682.146	64.2282	682.146	75.5787	682.146	58.3962	682.146	31.75	682.146	33.5661	682.146	137.114	682.146	100.491	682.146	106.761	682.146	112.716
	493.893	289.983	683.098	58.4998	683.098	62.1769	683.098	66.1247	683.098	62.7736	683.098	73.8553	683.098	72.512	683.098	80.5298	683.098	60.9477	683.098	37.7721	683.098	39.2415	683.098	145.26	683.098	110.176	683.098	122.614	683.098	128.132
	494.375	300.681	684.049	65.5958	684.049	68.0466	684.049	73.1428	684.049	69.0155	684.049	80.9781	684.049	80.5877	684.049	86.2977	684.049	64.5998	684.049	43.7675	684.049	44.8507	684.049	153.269	684.049	119.565	684.049	139.293	684.049	144.281
	494.858	310.946	685	72.5362	685	73.635	685	79.8573	685	74.7959	685	87.8522	685	88.3371	685	92.7344	685	68.434	685	49.6659	685	50.4332	685	160.842	685	128.629	685	156.331	685	160.795
	495.34	320.729	685.951	79.243	685.951	78.8801	685.951	86.1271	685.951	80.1363	685.951	94.4286	685.951	95.4975	685.951	99.8247	685.951	73.2964	685.951	55.3986	685.951	55.8708	685.951	167.927	685.951	137.267	685.951	173.444	685.951	177.425
	495.822	330.616	686.902	85.6466	686.902	83.7301	686.902	91.8693	686.902	85.0406	686.902	100.615	686.902	102.022	686.902	107.647	686.902	78.8876	686.902	60.8995	686.902	61.0702	686.902	174.465	686.902	145.386	686.902	190.402	686.902	193.917
	496.304	341.014	687.854	91.6758	687.854	88.1399	687.854	97.052	687.854	89.477	687.854	106.288	687.854	107.978	687.854	116.3	687.854	84.1498	687.854	66.1036	687.854	65.9665	687.854	180.375	687.854	152.901	687.854	206.961	687.854	210.035
	496.786	351.554	688.805	97.2369	688.805	92.0682	688.805	101.664	688.805	93.4025	688.805	111.319	688.805	113.302	688.805	125.112	688.805	91.0641	688.805	70.9457	688.805	70.5135	688.805	185.59	688.805	159.746	688.805	222.937	688.805	225.631
	497.268	361.06	689.756	102.252	689.756	95.4914	689.756	105.68	689.756	96.7824	689.756	115.751	689.756	117.968	689.756	137.093	689.756	99.861	689.756	75.3872	689.756	74.6789	689.756	190.073	689.756	165.87	689.756	238.149	689.756	240.553
	497.75	368.972	690.707	106.651	690.707	98.3797	690.707	109.058	690.707	99.5913	690.707	119.502	690.707	121.92	690.707	150.066	690.707	110.124	690.707	79.3895	690.707	78.4309	690.707	193.789	690.707	171.205	690.707	252.444	690.707	254.692
	498.232	375.973	691.659	110.387	691.659	100.708	691.659	111.762	691.659	101.806	691.659	122.519	691.659	125.141	691.659	163.029	691.659	121.59	691.659	82.9203	691.659	81.7433	691.659	196.703	691.659	175.712	691.659	265.679	691.659	267.911
	498.714	382.983	692.61	113.408	692.61	102.458	692.61	113.771	692.61	103.411	692.61	124.769	692.61	127.628	692.61	175.613	692.61	134.081	692.61	85.9518	692.61	84.5946	692.61	198.786	692.61	179.362	692.61	277.724	692.61	280.098
	499.197	389.97	693.561	115.621	693.561	103.612	693.561	115.073	693.561	104.4	693.561	126.225	693.561	129.362	693.561	187.5	693.561	148.197	693.561	88.4566	693.561	86.9677	693.561	200.018	693.561	182.118	693.561	288.468	693.561	291.257
	499.679	396.17	694.512	117.015	694.512	104.163	694.512	115.661	694.512	104.774	694.512	126.883	694.512	130.311	694.512	198.423	694.512	160.049	694.512	90.4155	694.512	88.8548	694.512	200.374	694.512	183.991	694.512	297.808	694.512	301.048
	500.161	401.238	695.463	117.672	695.463	104.111	695.463	115.524	695.463	104.555	695.463	126.762	695.463	130.477	695.463	208.72	695.463	169.744	695.463	91.8148	695.463	90.234	695.463	199.841	695.463	184.957	695.463	305.676	695.463	309.407
	500.643	405.203	696.415	117.604	696.415	103.458	696.415	114.662	696.415	103.749	696.415	125.901	696.415	129.869	696.415	216.514	696.415	175.413	696.415	92.6437	696.415	91.0861	696.415	198.408	696.415	185.028	696.415	312.014	696.415	316.285
	501.125	408.004	697.366	116.788	697.366	102.214	697.366	113.091	697.366	102.355	697.366	124.347	697.366	128.509	697.366	218.402	697.366	174.566	697.366	92.8976	697.366	91.3935	697.366	196.058	697.366	184.212	697.366	316.777	697.366	321.649
	501.607	410	698.317	115.243	698.317	100.392	698.317	110.835	698.317	100.395	698.317	122.143	698.317	126.425	698.317	205.159	698.317	164.894	698.317	92.5804	698.317	91.1431	698.317	192.764	698.317	182.476	698.317	319.933	698.317	325.484
	502.089	412.038	699.268	113.001	699.268	98.0114	699.268	107.939	699.268	97.8866	699.268	119.272	699.268	123.677	699.268	189.696	699.268	151.628	699.268	91.7021	699.268	90.3468	699.268	188.579	699.268	179.812	699.268	321.463	699.268	327.66
	502.571	414.778	700.219	110.087	700.219	95.09	700.219	104.442	700.219	94.8381	700.219	115.753	700.219	120.278	700.219	173.252	700.219	137.551	700.219	90.2876	700.219	89.02	700.219	183.534	700.219	176.249	700.219	321.364	700.219	328.225
	503.053	417.914	701.171	106.532	701.171	91.6518	701.171	100.394	701.171	91.2851	701.171	111.61	701.171	116.258	701.171	155.929	701.171	123.166	701.171	88.3545	701.171	87.1694	701.171	177.657	701.171	171.807	701.171	319.653	701.171	327.181
	503.536	420.776	702.122	102.367	702.122	87.7237	702.122	95.8369	702.122	87.2445	702.122	106.868	702.122	111.645	702.122	137.669	702.122	108.449	702.122	85.9196	702.122	84.7978	702.122	170.982	702.122	166.501	702.122	316.363	702.122	324.532
	504.018	423.22	703.073	97.6312	703.073	83.3323	703.073	90.8012	703.073	82.6585	703.073	101.558	703.073	106.465	703.073	119.018	703.073	93.968	703.073	83.0034	703.073	81.9038	703.073	163.566	703.073	160.344	703.073	311.552	703.073	320.344
	504.5	424.975	704.024	92.407	704.024	78.5077	704.024	85.3441	704.024	77.6263	704.024	95.7707	704.024	100.78	704.024	100.397	704.024	81.6356	704.024	79.6297	704.024	78.5263	704.024	155.491	704.024	153.434	704.024	305.213	704.024	314.612
	504.982	425.851	704.976	86.7518	704.976	73.2908	704.976	79.5128	704.976	72.2441	704.976	89.5228	704.976	94.6066	704.976	82.7715	704.976	70.8434	704.976	75.8266	704.976	74.683	704.976	146.82	704.976	145.808	704.976	297.385	704.976	307.352
	505.464	425.733	705.927	80.7306	705.927	67.7312	705.927	73.3751	705.927	66.5828	705.927	82.9009	705.927	88.0032	705.927	68.8254	705.927	61.6291	705.927	71.6321	705.927	70.4132	705.927	137.629	705.927	137.543	705.927	288.127	705.927	298.635
	505.946	424.504	706.878	74.4131	706.878	61.8879	706.878	67.0004	706.878	60.7056	706.878	76.0097	706.878	81.0487	706.878	59.9167	706.878	53.9184	706.878	67.0909	706.878	65.7629	706.878	128	706.878	128.722	706.878	277.505	706.878	288.542
	506.428	422.249	707.829	67.8712	707.829	55.831	707.829	60.4246	707.829	54.6883	707.829	68.9139	707.829	73.8377	707.829	52.5174	707.829	47.1484	707.829	62.2558	707.829	60.7686	707.829	118.011	707.829	119.402	707.829	265.597	707.829	277.163
	506.911	419.097	708.781	61.1843	708.781	49.6498	708.781	53.773	708.781	48.6189	708.781	61.6834	708.781	66.44	708.781	47.3879	708.781	41.1263	708.781	57.1865	708.781	55.4756	708.781	107.74	708.781	109.708	708.781	252.519	708.781	264.609
	507.393	415.236	709.732	54.4393	709.732	43.4251	709.732	47.1596	709.732	42.6274	709.732	54.3865	709.732	58.9336	709.732	42.978	709.732	35.8515	709.732	51.9447	709.732	49.9604	709.732	97.2639	709.732	99.7193	709.732	238.38	709.732	250.975
	507.875	411.063	710.683	47.7363	710.683	37.2393	710.683	40.6746	710.683	36.8015	710.683	47.1158	710.683	51.4584	710.683	38.9823	710.683	31.1121	710.683	46.601	710.683	44.2822	710.683	86.5943	710.683	89.5439	710.683	223.308	710.683	236.417
	508.357	407.961	711.634	41.1901	711.634	31.174	711.634	34.4062	711.634	31.2044	711.634	39.974	711.634	44.1316	711.634	35.2734	711.634	26.8278	711.634	41.2307	711.634	38.5086	711.634	75.8296	711.634	79.2865	711.634	207.436	711.634	221.058
	508.839	406.435	712.585	34.9309	712.585	25.3156	712.585	28.4431	712.585	25.8985	712.585	33.087	712.585	37.0245	712.585	31.839	712.585	23.3132	712.585	35.9131	712.585	32.7384	712.585	65.2759	712.585	69.0276	712.585	190.899	712.585	204.975
	509.321	405.412	713.537	29.1702	713.537	19.7674	713.537	22.8355	713.537	20.9411	713.537	26.5253	713.537	30.3262	713.537	28.5341	713.537	20.28	713.537	30.7234	713.537	27.0235	713.537	55.0686	713.537	58.9477	713.537	173.869	713.537	188.308
	509.803	403.381	714.488	24.038	714.488	14.6275	714.488	17.6966	714.488	16.3904	714.488	20.4473	714.488	24.0822	714.488	25.4481	714.488	17.6504	714.488	25.754	714.488	21.4588	714.488	45.3224	714.488	49.0969	714.488	156.537	714.488	171.191
	510.285	399.828	715.439	17.8471	715.439	10.0128	715.439	13.1147	715.439	12.3045	715.439	14.9283	715.439	18.4093	715.439	22.4906	715.439	15.3232	715.439	21.0621	715.439	16.1416	715.439	36.1512	715.439	39.6791	715.439	139.107	715.439	153.83
	510.767	394.536	716.39	9.95656	716.39	6.04271	716.39	9.16261	716.39	8.74415	716.39	10.0476	716.39	13.4253	716.39	19.6616	716.39	13.1824	716.39	16.7379	716.39	11.1684	716.39	27.6625	716.39	30.9226	716.39	121.803	716.39	136.464
	511.25	387.417	717.341	3.09289	717.341	2.83096	717.341	5.90164	717.341	5.76885	717.341	5.91303	717.341	9.24114	717.341	17.0995	717.341	11.1095	717.341	12.9518	717.341	6.64067	717.341	19.9537	717.341	22.9726	717.341	104.867	717.341	119.319
	511.732	379.347	718.293	-2.7004	718.293	0.40243	718.293	3.42808	718.293	3.42221	718.293	2.61455	718.293	5.90075	718.293	15.0367	718.293	9.71381	718.293	9.79096	718.293	2.65696	718.293	13.131	718.293	15.9486	718.293	88.5461	718.293	102.722
	512.214	371.318	719.244	-7.36421	719.244	-1.21737	719.244	0.36661	719.244	1.75304	719.244	0.18282	719.244	3.59387	719.244	13.1891	719.244	8.3969	719.244	7.32897	719.244	-0.72483	719.244	7.2438	719.244	9.96482	719.244	73.0763	719.244	86.9236
	512.696	363.451	720.195	-11.0267	720.195	-1.9973	720.195	-2.12246	720.195	0.74593	720.195	-1.34682	720.195	2.30432	720.195	11.5701	720.195	7.44865	720.195	5.55505	720.195	-3.4544	720.195	2.34613	720.195	5.08231	720.195	58.911	720.195	72.237
	513.178	355.086	721.146	-13.795	721.146	-1.93588	721.146	-3.7659	721.146	0.38519	721.146	-1.97458	721.146	-0.21328	721.146	10.1671	721.146	6.69396	721.146	2.89464	721.146	-5.48733	721.146	-1.63242	721.146	1.34891	721.146	46.5101	721.146	58.964
	513.66	345.851	722.098	-15.6683	722.098	-1.47789	722.098	-4.60033	722.098	0.09225	722.098	-1.72517	722.098	-1.77755	722.098	8.94441	722.098	5.62624	722.098	1.00858	722.098	-6.79624	722.098	-4.89791	722.098	-1.18995	722.098	36.2296	722.098	47.4023
	514.142	335.84	723.049	-16.8407	723.049	-1.70226	723.049	-4.90875	723.049	-1.39185	723.049	-0.64386	723.049	-2.60247	723.049	7.94166	723.049	5.15917	723.049	-0.2847	723.049	-7.39581	723.049	-7.34557	723.049	-2.57071	723.049	28.3068	723.049	37.885
	514.624	325.199	724	-17.377	724	-1.38278	724	-4.61132	724	-2.32698	724	1.21305	724	-2.65705	724	7.20834	724	4.1445	724	-1.19643	724	-7.35444	724	-9.16445	724	-3.3418	724	22.8781	724	30.51
	515.106	314.157	724.951	-17.3154	724.951	-0.56348	724.951	-3.64785	724.951	-2.76777	724.951	3.81702	724.951	-1.9871	724.951	6.64746	724.951	3.37569	724.951	-1.77973	724.951	-6.83455	724.951	-10.4206	724.951	-3.86453	724.951	20.1145	724.951	25.4911
	515.589	303.118	725.902	-16.6962	725.902	0.71036	725.902	-2.13496	725.902	-2.76677	725.902	5.97118	725.902	-0.68482	725.902	6.26292	725.902	3.10116	725.902	-2.06207	725.902	-5.9779	725.902	-11.199	725.902	-3.86227	725.902	19.55	725.902	22.8885
	516.071	292.459	726.854	-15.561	726.854	2.41602	726.854	-0.18417	726.854	-2.34978	726.854	8.15409	726.854	1.14614	726.854	6.08141	726.854	3.22036	726.854	-2.08715	726.854	-4.87432	726.854	-11.6225	726.854	-3.5315	726.854	20.1346	726.854	22.3377
	516.553	281.853	727.805	-13.9422	727.805	4.53499	727.805	2.14804	727.805	-1.58745	727.805	10.8844	727.805	3.50169	727.805	5.96309	727.805	2.97647	727.805	-1.92272	727.805	-3.56207	727.805	-11.7359	727.805	-2.9008	727.805	21.7175	727.805	21.78
	517.035	270.66	728.756	-11.8693	728.756	7.04929	728.756	4.8435	728.756	-0.52265	728.756	14.1633	728.756	6.37601	728.756	6.03515	728.756	2.79083	728.756	-1.59187	728.756	-2.23855	728.756	-11.6091	728.756	-2.006	728.756	24.1038	728.756	22.3214
	517.517	258.563	729.707	-9.37775	729.707	9.94322	729.707	7.87633	729.707	0.81471	729.707	17.9897	729.707	9.73648	729.707	6.20592	729.707	2.67792	729.707	-1.12125	729.707	-2.02338	729.707	-11.3086	729.707	-0.87418	729.707	27.0964	729.707	23.6169
	517.999	245.692	730.659	-6.50064	730.659	13.189	730.659	11.1956	730.659	2.37023	730.659	22.3348	730.659	13.5287	730.659	6.41029	730.659	2.68416	730.659	-0.50349	730.659	-1.79272	730.659	-10.8902	730.659	0.44257	730.659	30.5085	730.659	25.2888
	518.481	232.242	731.61	-3.27171	731.61	16.7574	731.61	14.7837	731.61	4.13123	731.61	27.1607	731.61	17.7025	731.61	6.43106	731.61	2.87169	731.61	0.26071	731.61	-1.5329	731.61	-10.3981	731.61	1.92665	731.61	34.1864	731.61	27.2129
	518.963	218.868	732.561	0.2767	732.561	20.6409	732.561	18.6522	732.561	6.09973	732.561	32.416	732.561	22.2404	732.561	5.39857	732.561	3.35908	732.561	1.15431	732.561	-1.20807	732.561	-9.89987	732.561	3.73064	732.561	38.0294	732.561	29.3572
	519.446	206.667	733.512	4.11063	733.512	24.8263	733.512	22.7909	733.512	8.43462	733.512	38.0547	733.512	27.0906	733.512	-0.41436	733.512	3.88995	733.512	2.16451	733.512	-0.80094	733.512	-9.22495	733.512	5.77217	733.512	42.1227	733.512	31.7258
	519.928	195.984	734.463	8.19325	734.463	29.2905	734.463	27.2617	734.463	11.1303	734.463	44.0137	734.463	32.3834	734.463	1.39857	734.463	4.42887	734.463	3.27391	734.463	-0.31575	734.463	-8.4238	734.463	8.04362	734.463	46.4405	734.463	34.236
	520.41	185.823	735.415	12.4781	735.415	33.9992	735.415	32.0516	735.415	14.1208	735.415	50.2304	735.415	38.1137	735.415	6.2982	735.415	5.05896	735.415	4.47109	735.415	0.24206	735.415	-7.55169	735.415	10.5246	735.415	50.9299	735.415	36.8276
	520.892	174.651	736.366	16.9156	736.366	38.917	736.366	37.0957	736.366	17.363	736.366	56.6734	736.366	44.1502	736.366	9.07709	736.366	5.79396	736.366	5.74761	736.366	0.86949	736.366	-6.63277	736.366	13.1796	736.366	55.5232	736.366	39.4929
	521.374	162.663	737.317	21.4666	737.317	44.0085	737.317	42.3238	737.317	20.8276	737.317	63.3568	737.317	50.4722	737.317	8.99266	737.317	6.47284	737.317	7.09977	737.317	1.56074	737.317	-5.69071	737.317	15.9859	737.317	60.1511	737.317	42.1739
	521.856	151.266	738.268	26.0963	738.268	49.2251	738.268	47.7059	738.268	24.4865	738.268	70.1655	738.268	57.0082	738.268	9.19761	738.268	7.1355	738.268	8.51466	738.268	2.30344	738.268	-4.75064	738.268	18.9162	738.268	64.7672	738.268	44.882
	522.338	141.379	739.219	30.7575	739.219	54.5222	739.219	53.2214	739.219	28.3154	739.219	77.0801	739.219	63.731	739.219	9.28344	739.219	7.34927	739.219	9.98641	739.219	3.07847	739.219	-3.84306	739.219	21.9869	739.219	69.3123	739.219	47.5481
	522.82	131.988	740.171	35.383	740.171	59.858	740.171	58.8453	740.171	32.2777	740.171	84.0785	740.171	70.5612	740.171	9.22405	740.171	7.39661	740.171	11.5048	740.171	3.87175	740.171	-2.98611	740.171	25.1122	740.171	73.7321	740.171	50.1179
	523.302	121.455	741.122	39.9185	741.122	65.1907	741.122	64.5339	741.122	36.3323	741.122	91.1248	741.122	77.4172	741.122	8.94814	741.122	7.38045	741.122	13.0552	741.122	4.67328	741.122	-2.19448	741.122	28.2506	741.122	77.9783	741.122	52.524
	523.784	110.007	742.073	44.3699	742.073	70.4792	742.073	70.2398	742.073	40.4375	742.073	98.1891	742.073	84.2379	742.073	8.33302	742.073	7.15676	742.073	14.6273	742.073	5.47093	742.073	-1.47913	742.073	31.3781	742.073	82.0108	742.073	54.6133
	524.267	99.3847	743.024	48.6838	743.024	75.6872	743.024	75.9197	743.024	44.5557	743.024	105.226	743.024	90.9887	743.024	8.03179	743.024	6.64051	743.024	16.2129	743.024	6.24628	743.024	-0.84229	743.024	34.4384	743.024	85.8074	743.024	56.469
	524.749	91.0472	743.976	52.8141	743.976	80.7743	743.976	81.5687	743.976	48.6461	743.976	112.213	743.976	97.577	743.976	7.79272	743.976	6.10936	743.976	17.7936	743.976	7.00029	743.976	-0.28825	743.976	37.4215	743.976	89.3375	743.976	58.0418
	525.231	84.0612	744.927	56.7116	744.927	85.7009	744.927	87.1377	744.927	52.6734	744.927	119.08	744.927	104.003	744.927	7.5665	744.927	5.53411	744.927	19.3415	744.927	7.72793	744.927	-0.12474	744.927	40.2455	744.927	92.5823	744.927	59.3702
	525.713	77.3575	745.878	60.332	745.878	90.4301	745.878	92.5963	745.878	56.5953	745.878	125.757	745.878	110.225	745.878	7.36268	745.878	4.8432	745.878	20.8367	745.878	8.41797	745.878	-0.35527	745.878	42.8782	745.878	95.516	745.878	60.4463
	526.195	70.559	746.829	63.6374	746.829	94.9267	746.829	97.9086	746.829	60.3843	746.829	132.183	746.829	116.188	746.829	7.22015	746.829	3.99285	746.829	22.2581	746.829	9.05484	746.829	-0.65777	746.829	45.2955	746.829	98.118	746.829	61.2788
	526.677	63.5485	747.781	66.5927	747.781	99.157	747.781	103.033	747.781	64.0206	747.781	138.338	747.781	121.815	747.781	7.13009	747.781	3.38073	747.781	23.5866	747.781	9.62953	747.781	-1.0236	747.781	47.4708	747.781	100.376	747.781	61.9451
	527.159	56.0949	748.732	69.1635	748.732	103.092	748.732	107.926	748.732	67.4409	748.732	144.184	748.732	127.076	748.732	7.05393	748.732	2.88219	748.732	24.79	748.732	10.1278	748.732	-1.43569	748.732	49.389	748.732	102.272	748.732	62.4293
	527.641	48.583	749.683	71.3164	749.683	106.701	749.683	112.53	749.683	70.6589	749.683	149.64	749.683	131.937	749.683	6.98265	749.683	2.43616	749.683	25.8429	749.683	10.5449	749.683	-1.87745	749.683	51.0309	749.683	103.772	749.683	62.7599
	528.124	42.1007	750.634	73.0211	750.634	109.957	750.634	116.784	750.634	73.6526	750.634	154.671	750.634	136.353	750.634	6.90493	750.634	1.95206	750.634	26.6763	750.634	10.8827	750.634	-2.32024	750.634	52.3924	750.634	104.865	750.634	62.9235
	528.606	37.0464	751.585	74.2507	751.585	112.833	751.585	120.657	751.585	76.3937	751.585	159.235	751.585	140.303	751.585	6.81253	751.585	1.39877	751.585	27.2991	751.585	11.1416	751.585	-2.75177	751.585	53.4715	751.585	105.545	751.585	62.9437
	529.088	33.3301	752.537	74.9879	752.537	115.313	752.537	124.121	752.537	78.8572	752.537	163.284	752.537	143.751	752.537	6.71033	752.537	0.99918	752.537	27.7376	752.537	11.3188	752.537	-3.1675	752.537	54.2683	752.537	105.822	752.537	62.8659
	529.57	30.6744	753.488	75.2139	753.488	117.377	753.488	127.135	753.488	81.0275	753.488	166.786	753.488	146.667	753.488	6.54575	753.488	0.3162	753.488	27.9851	753.488	11.4052	753.488	-3.55818	753.488	54.7853	753.488	105.711	753.488	62.7489
	530.052	29.0216	754.439	74.9164	754.439	119.008	754.439	129.667	754.439	82.8921	754.439	169.684	754.439	149.018	754.439	6.34372	754.439	0.05769	754.439	28.0507	754.439	11.4034	754.439	-3.93318	754.439	55.0261	754.439	105.228	754.439	62.5759
	530.534	28.403	755.39	74.0934	755.39	120.187	755.39	131.697	755.39	84.4308	755.39	171.928	755.39	150.792	755.39	6.20593	755.39	0.2769	755.39	27.9432	755.39	11.3211	755.39	-4.30359	755.39	54.9873	755.39	104.401	755.39	62.338
	531.016	28.8587	756.341	72.7517	756.341	120.892	756.341	133.199	756.341	85.6206	756.341	173.474	756.341	151.986	756.341	6.16489	756.341	0.82251	756.341	27.6706	756.341	11.1638	756.341	-4.67976	756.341	54.6766	756.341	103.266	756.341	62.0158
	531.498	30.3597	757.293	70.9132	757.293	121.112	757.293	134.14	757.293	86.4547	757.293	174.316	757.293	152.583	757.293	6.12027	757.293	1.36553	757.293	27.2373	757.293	10.9402	757.293	-5.06927	757.293	54.0977	757.293	101.857	757.293	61.5796
	531.981	32.7104	758.244	68.5992	758.244	120.843	758.244	134.475	758.244	86.9184	758.244	174.456	758.244	152.586	758.244	6.08378	758.244	1.98142	758.244	26.6546	758.244	10.661	758.244	-5.47644	758.244	53.2442	758.244	100.205	758.244	61.0155
	532.463	34.8292	759.195	65.8316	759.195	120.083	759.195	134.234	759.195	87.0066	759.195	173.859	759.195	151.977	759.195	6.0673	759.195	2.22756	759.195	25.9394	759.195	10.3351	759.195	-5.90286	759.195	52.1213	759.195	98.3347	759.195	60.2676
	532.945	35.6061	760.146	62.6284	760.146	118.839	760.146	133.432	760.146	86.7165	760.146	172.53	760.146	150.752	760.146	6.05786	760.146	2.33135	760.146	25.1051	760.146	9.97122	760.146	-6.34915	760.146	50.7403	760.146	96.2758	760.146	59.3308
	533.427	35.3767	761.098	59.0082	761.098	117.135	761.098	132.089	761.098	86.0508	761.098	170.511	761.098	148.901	761.098	6.04689	761.098	2.37637	761.098	24.1601	761.098	9.5744	761.098	-6.81037	761.098	49.1137	761.098	94.055	761.098	58.2357
	533.909	34.9102	762.049	54.997	762.049	114.997	762.049	130.254	762.049	85.0127	762.049	167.858	762.049	146.415	762.049	6.02964	762.049	2.31634	762.049	23.0996	762.049	9.14254	762.049	-7.28169	762.049	47.2607	762.049	91.6998	762.049	57.0417
	534.391	35.4623	763	50.6279	763	112.463	763	127.941	763	83.6195	763	164.604	763	143.376	763	5.98854	763	2.21188	763	21.9435	763	8.69067	763	-7.75843	763	45.1981	763	89.2307	763	55.7801
	534.873	36.952	763.951	45.9339	763.951	109.565	763.951	125.178	763.951	81.891	763.951	160.805	763.951	139.818	763.951	5.80996	763.951	2.24687	763.951	20.7036	763.951	8.22635	763.951	-8.23437	763.951	42.9529	763.951	86.6701	763.951	54.4591
	535.355	39.4549	764.902	40.9363	764.902	106.347	764.902	121.994	764.902	79.8431	764.902	156.514	764.902	135.796	764.902	5.61212	764.902	2.28381	764.902	19.3936	764.902	7.76022	764.902	-8.70516	764.902	40.5475	764.902	84.0286	764.902	53.0664
	535.837	43.0926	765.854	35.6635	765.854	102.847	765.854	118.411	765.854	77.4896	765.854	151.785	765.854	131.349	765.854	5.36896	765.854	2.2246	765.854	18.0305	765.854	7.29476	765.854	-9.16507	765.854	38.001	765.854	81.3354	765.854	51.5929
	536.32	46.9067	766.805	30.1434	766.805	99.1072	766.805	114.457	766.805	74.8455	766.805	146.618	766.805	126.522	766.805	5.00118	766.805	2.03358	766.805	16.6257	766.805	6.82052	766.805	-9.60889	766.805	35.3352	766.805	78.5994	766.805	50.0553
	536.802	49.2353	767.756	24.4062	767.756	95.1592	767.756	110.172	767.756	71.8953	767.756	141.04	767.756	121.36	767.756	4.41772	767.756	1.8714	767.756	15.1914	767.756	6.34487	767.756	-10.0292	767.756	32.5755	767.756	75.8343	767.756	48.4688
	537.284	50.3227	768.707	18.4853	768.707	91.0409	768.707	105.595	768.707	68.6848	768.707	135.111	768.707	115.92	768.707	3.8356	768.707	2.06117	768.707	13.7396	768.707	5.8695	768.707	-10.4173	768.707	29.7491	768.707	73.0519	768.707	46.8485
	537.766	51.6428	769.659	12.4186	769.659	86.7946	769.659	100.76	769.659	65.2567	769.659	128.909	769.659	110.272	769.659	3.27816	769.659	1.99534	769.659	12.2823	769.659	5.39039	769.659	-10.7679	769.659	26.8786	769.659	70.2647	769.659	45.2097
	538.248	54.3792	770.61	6.24404	770.61	82.4612	770.61	95.6851	770.61	61.6273	770.61	122.523	770.61	104.446	770.61	2.7352	770.61	1.74322	770.61	10.8293	770.61	4.90519	770.61	-11.0647	770.61	23.9942	770.61	67.462	770.61	43.592
	538.73	58.0984	771.561	0	771.561	78.0797	771.561	90.3709	771.561	57.8683	771.561	116.009	771.561	98.5076	771.561	2.19975	771.561	1.42251	771.561	9.39235	771.561	4.41994	771.561	-11.2873	771.561	21.1233	771.561	64.667	771.561	41.9382
	539.212	62.2653	772.512	-2.62902	772.512	73.6779	772.512	84.8783	772.512	54.0312	772.512	109.428	772.512	92.531	772.512	1.68032	772.512	1.0495	772.512	7.98816	772.512	3.92082	772.512	-11.4158	772.512	18.2808	772.512	61.9069	772.512	40.3505
	539.694	66.5994	773.463	-5.23486	773.463	69.2838	773.463	79.1751	773.463	50.1494	773.463	102.819	773.463	86.5699	773.463	1.17808	773.463	0.65586	773.463	6.63105	773.463	3.40936	773.463	-11.4294	773.463	15.4963	773.463	59.1825	773.463	38.8273
	540.177	70.7559	774.415	-7.78202	774.415	64.9252	774.415	73.3726	774.415	46.2598	774.415	96.2297	774.415	80.681	774.415	0.8525	774.415	0.28613	774.415	5.33564	774.415	2.88192	774.415	-11.302	774.415	12.846	774.415	56.5228	774.415	37.3685
	540.659	74.4194	775.366	-10.2401	775.366	60.6238	775.366	67.599	775.366	42.3858	775.366	89.6923	775.366	74.8925	775.366	0.54375	775.366	0.08194	775.366	4.10303	775.366	2.33612	775.366	-11.0404	775.366	10.372	775.366	53.9563	775.366	35.9543
	541.141	77.6977	776.317	-12.5839	776.317	56.3995	776.317	61.9563	776.317	38.5629	776.317	83.2744	776.317	69.2444	776.317	0.21885	776.317	0.05795	776.317	2.95255	776.317	1.77897	776.317	-10.6618	776.317	8.104	776.317	51.5098	776.317	34.5841
	541.623	80.8939	777.268	-14.803	777.268	52.2743	777.268	56.4772	777.268	34.8256	777.268	77.0005	777.268	63.7657	777.268	-0.0471	777.268	0.12183	777.268	1.89914	777.268	1.21202	777.268	-10.1734	777.268	6.05258	777.268	49.2134	777.268	33.2596
	542.105	84.1845	778.219	-16.8807	778.219	48.2602	778.219	51.1747	778.219	31.2056	778.219	70.8607	778.219	58.4886	778.219	-0.19615	778.219	0.19154	778.219	0.95978	778.219	0.70023	778.219	-9.5823	778.219	4.21942	778.219	47.087	778.219	31.9647
	542.587	87.805	779.171	-18.8036	779.171	44.3723	779.171	46.0955	779.171	27.7647	779.171	64.8597	779.171	53.4462	779.171	-0.27176	779.171	0.18889	779.171	0.1279	779.171	0.28586	779.171	-8.89307	779.171	2.62942	779.171	45.1453	779.171	30.664
	543.069	92.2011	780.122	-20.5629	780.122	40.618	780.122	41.2724	780.122	24.5286	780.122	58.9822	780.122	48.6574	780.122	-0.20384	780.122	0.40133	780.122	-0.58422	780.122	-0.01969	780.122	-8.11491	780.122	1.29677	780.122	43.4023	780.122	29.3073
	543.551	96.9893	781.073	-22.1516	781.073	37.0074	781.073	36.687	781.073	21.5013	781.073	53.2585	781.073	44.1093	781.073	0	781.073	0.74004	781.073	-1.15027	781.073	-0.22405	781.073	-7.26194	781.073	0.22885	781.073	41.8576	781.073	27.8846
	544.033	101.015	782.024	-23.5653	782.024	33.5494	782.024	32.3451	782.024	18.7235	782.024	47.7114	782.024	39.7811	782.024	0.31505	782.024	1.02857	782.024	-1.98062	782.024	-0.32058	782.024	-6.33937	782.024	-0.5707	782.024	40.5203	782.024	26.4039
	544.516	103.909	782.976	-24.8055	782.976	30.2472	782.976	28.2341	782.976	16.1496	782.976	42.3641	782.976	35.7015	782.976	0.78455	782.976	1.22336	782.976	-3.05702	782.976	-0.30299	782.976	-5.36856	782.976	-1.11242	782.976	39.3968	782.976	24.8792
	544.998	106.174	783.927	-25.8693	783.927	27.1088	783.927	24.3705	783.927	13.7777	783.927	37.2664	783.927	31.8683	783.927	1.72615	783.927	1.37439	783.927	-3.96359	783.927	-0.1654	783.927	-4.35727	783.927	-1.40217	783.927	38.4943	783.927	23.348
	545.48	108.687	784.878	-26.7534	784.878	24.1388	784.878	20.7781	784.878	11.6062	784.878	32.4577	784.878	28.2768	784.878	2.90668	784.878	1.43544	784.878	-4.69671	784.878	0.09342	784.878	-3.31127	784.878	-1.45263	784.878	37.8213	784.878	21.8032
	545.962	111.243	785.829	-27.459	785.829	21.3417	785.829	17.4893	785.829	9.63535	785.829	27.9522	785.829	24.9259	785.829	4.27969	785.829	1.53751	785.829	-5.25921	785.829	0.47679	785.829	-2.2348	785.829	-0.94414	785.829	37.4002	785.829	20.2564
	546.444	113.116	786.781	-27.9411	786.781	18.7258	786.781	14.5026	786.781	7.8621	786.781	23.7812	786.781	21.7932	786.781	5.75747	786.781	1.74772	786.781	-5.65471	786.781	0.98462	786.781	-1.13136	786.781	-0.2099	786.781	37.2326	786.781	18.7437
	546.926	113.917	787.732	-28.2528	787.732	16.2979	787.732	11.806	787.732	6.26777	787.732	19.9657	787.732	18.8618	787.732	7.1918	787.732	2.02434	787.732	-5.89933	787.732	1.6221	787.732	0	787.732	0.64583	787.732	37.3081	787.732	17.2897
	547.408	114.313	788.683	-28.4563	788.683	14.0611	788.683	9.38299	788.683	4.8427	788.683	16.5151	788.683	16.1393	788.683	8.66005	788.683	2.60163	788.683	-6.01193	788.683	1.98957	788.683	1.32336	788.683	1.64035	788.683	37.609	788.683	15.9166
	547.89	115.6	789.634	-28.5578	789.634	12.0177	789.634	7.23644	789.634	3.58207	789.634	13.4433	789.634	13.6146	789.634	10.1359	789.634	3.44027	789.634	-6.01034	789.634	1.69008	789.634	2.66609	789.634	2.75473	789.634	38.1136	789.634	14.6301
	548.372	117.284	790.585	-28.5458	790.585	10.1672	790.585	5.37756	790.585	2.47793	790.585	10.756	790.585	11.2786	790.585	11.5529	790.585	4.35537	790.585	-5.91898	790.585	1.50301	790.585	4.02374	790.585	3.96543	790.585	38.7904	790.585	13.449
	548.855	117.688	791.537	-28.4105	791.537	8.50884	791.537	3.77458	791.537	1.53425	791.537	8.45658	791.537	9.11592	791.537	12.9207	791.537	5.37007	791.537	-5.76726	791.537	1.41965	791.537	5.39096	791.537	5.25171	791.537	39.602	791.537	12.3838
	549.337	115.688	792.488	-28.1385	792.488	7.04058	792.488	2.41884	792.488	0.75807	792.488	6.50445	792.488	7.17761	792.488	14.2763	792.488	6.55226	792.488	-5.57859	792.488	1.42644	792.488	6.76685	792.488	6.57701	792.488	40.5205	792.488	11.4869
	549.819	112.522	793.439	-27.7118	793.439	5.75991	793.439	1.33151	793.439	0.14825	793.439	4.88014	793.439	5.41969	793.439	15.5644	793.439	7.67612	793.439	-5.36308	793.439	1.50291	793.439	8.1555	793.439	7.95269	793.439	41.5152	793.439	10.7172
	550.301	109.977	794.39	-27.1157	794.39	4.66191	794.39	0.49695	794.39	-0.29183	794.39	3.5653	794.39	3.83116	794.39	16.8672	794.39	9.03664	794.39	-5.13549	794.39	1.62585	794.39	9.56219	794.39	9.34218	794.39	42.571	794.39	10.076
	550.783	108.331	795.341	-26.3412	795.341	3.73926	795.341	-0.10434	795.341	-0.57974	795.341	2.54446	795.341	2.42916	795.341	18.1273	795.341	10.6143	795.341	-4.90988	795.341	1.77678	795.341	10.9932	795.341	10.72	795.341	43.675	795.341	9.574
	551.265	107.029	796.293	-25.3803	796.293	2.98314	796.293	-0.46153	796.293	-0.74647	796.293	1.74316	796.293	1.20399	796.293	19.3861	796.293	12.3137	796.293	-4.69812	796.293	1.93863	796.293	12.4525	796.293	12.0775	796.293	44.8173	796.293	9.14609
	551.747	105.683	797.244	-24.2172	797.244	2.3837	797.244	-0.62363	797.244	-0.75908	797.244	1.10673	797.244	0.15385	797.244	20.6793	797.244	14.1214	797.244	-4.51059	797.244	2.10033	797.244	13.9436	797.244	13.4082	797.244	46.0022	797.244	8.77349
	552.229	104.486	798.195	-22.8794	798.195	1.92605	798.195	-0.61661	798.195	-0.66436	798.195	0.64148	798.195	-0.74136	798.195	21.995	798.195	16.2182	798.195	-4.35442	798.195	2.25322	798.195	15.4674	798.195	14.7197	798.195	47.2536	798.195	8.40576
	552.712	103.632	799.146	-21.4	799.146	1.59526	799.146	-0.4519	799.146	-0.66756	799.146	0.32312	799.146	-1.3693	799.146	23.3331	799.146	18.2784	799.146	-4.17387	799.146	2.38761	799.146	17.0049	799.146	16.0089	799.146	48.5776	799.146	8.04847
	553.194	102.783	800.098	-19.7915	800.098	1.37538	800.098	-0.15451	800.098	-0.72251	800.098	0.13106	800.098	-1.07521	800.098	24.7027	800.098	20.1256	800.098	-3.9758	800.098	2.49663	800.098	18.5436	800.098	17.2688	800.098	49.9765	800.098	7.68333
	553.676	101.404	801.049	-18.0585	801.049	1.25324	801.049	0.25574	801.049	-0.6971	801.049	0.01614	801.049	-0.6351	801.049	26.1335	801.049	21.6719	801.049	-3.78517	801.049	2.57105	801.049	20.0724	801.049	18.4945	801.049	51.4607	801.049	7.26562
	554.158	99.1987	802	-16.2089	802	1.21737	802	0.73493	802	-0.60168	802	-0.04821	802	-0.0547	802	27.5978	802	23.1161	802	-3.58793	802	2.61215	802	21.5713	802	19.686	802	53.0414	802	6.7573
	554.64	96.7209	802.951	-14.2487	802.951	1.25266	802.951	0.95945	802.951	-0.44723	802.951	-0.09299	802.951	0.65529	802.951	29.0394	802.951	24.7762	802.951	-3.38621	802.951	2.62221	802.951	23.036	802.951	20.8376	802.951	54.7343	802.951	6.15117
	555.122	94.6178	803.902	-12.1828	803.902	1.34586	803.902	0.96034	803.902	-0.23414	803.902	-0.13752	803.902	1.46588	803.902	30.5138	803.902	26.293	803.902	-3.18285	803.902	2.6013	803.902	24.465	803.902	21.9509	803.902	56.611	803.902	5.4476
	555.604	92.7771	804.854	-10.013	804.854	1.4911	804.854	0.97547	804.854	0.04407	804.854	-0.18604	804.854	2.35059	804.854	31.9948	804.854	27.8269	804.854	-2.9806	804.854	2.55185	804.854	25.8585	804.854	23.0157	804.854	58.6897	804.854	4.67579
	556.086	90.2544	805.805	-7.74089	805.805	1.6838	805.805	1.00684	805.805	0.38668	805.805	-0.24137	805.805	3.29089	805.805	33.4988	805.805	29.2974	805.805	-2.78258	805.805	2.47574	805.805	27.216	805.805	24.0267	805.805	60.7296	805.805	3.85421
	556.568	86.5217	806.756	-5.36835	806.756	1.91547	806.756	1.09327	806.756	0.78349	806.756	0.40339	806.756	4.27519	806.756	35.0124	806.756	30.6363	806.756	-2.58975	806.756	2.3712	806.756	28.5321	806.756	24.9841	806.756	62.7261	806.756	2.97915
	557.051	82.2146	807.707	-3.5441	807.707	2.1851	807.707	1.20971	807.707	1.20799	807.707	1.04946	807.707	5.28302	807.707	36.5221	807.707	31.8465	807.707	-2.41407	807.707	2.23838	807.707	29.8085	807.707	25.8937	807.707	64.6825	807.707	2.03652
	557.533	78.714	808.659	-4.76454	808.659	2.49908	808.659	1.35243	808.659	1.65152	808.659	1.6822	808.659	6.28736	808.659	38.033	808.659	33.0782	808.659	-2.26332	808.659	2.07759	808.659	31.0495	808.659	26.7541	808.659	66.5854	808.659	1.04382
	558.015	76.3747	809.61	-5.87848	809.61	2.86358	809.61	1.52143	809.61	2.11232	809.61	2.29986	809.61	7.28235	809.61	39.4873	809.61	34.2316	809.61	-2.14402	809.61	1.89045	809.61	32.2579	809.61	27.5684	809.61	68.4421	809.61	0.0236
	558.497	74.6972	810.561	-6.88337	810.561	3.2853	810.561	1.72421	810.561	2.59352	810.561	2.90408	810.561	8.26462	810.561	40.9268	810.561	35.315	810.561	-2.06221	810.561	1.6806	810.561	33.4377	810.561	28.35	810.561	70.29	810.561	-1.02556
	558.979	72.5413	811.512	-7.7806	811.512	3.77503	811.512	1.96894	811.512	3.11308	811.512	3.52029	811.512	9.23262	811.512	42.3367	811.512	36.3736	811.512	-2.02996	811.512	1.45355	811.512	34.5888	811.512	29.133	811.512	72.1462	811.512	-2.08087
	559.461	69.9486	812.463	-8.57379	812.463	4.34107	812.463	2.27188	812.463	3.67203	812.463	4.18239	812.463	10.1801	812.463	43.7221	812.463	37.4692	812.463	-2.04811	812.463	1.20954	812.463	35.7151	812.463	29.9355	812.463	74.0326	812.463	-3.12374
	559.943	67.2943	813.415	-9.25108	813.415	4.97641	813.415	2.61824	813.415	4.27253	813.415	4.90676	813.415	11.0954	813.415	45.0956	813.415	38.6742	813.415	-2.11531	813.415	0.94355	813.415	36.8268	813.415	30.7594	813.415	75.9689	813.415	-4.114
	560.425	64.6285	814.366	-9.80503	814.366	5.67856	814.366	3.0064	814.366	4.9188	814.366	5.68223	814.366	11.99	814.366	46.3585	814.366	40.1086	814.366	-2.23278	814.366	0.65301	814.366	37.9331	814.366	31.606	814.366	77.9496	814.366	-5.01422
	560.908	61.7679	815.317	-10.2152	815.317	6.4468	815.317	3.44309	815.317	5.61241	815.317	6.53548	815.317	12.8844	815.317	47.6225	815.317	41.4046	815.317	-2.39902	815.317	0.3375	815.317	39.0451	815.317	32.4816	815.317	79.9973	815.317	-5.80619
	561.39	59.4847	816.268	-10.4347	816.268	7.28172	816.268	3.9546	816.268	6.35064	816.268	7.49648	816.268	13.7981	816.268	48.88	816.268	42.7176	816.268	-2.61124	816.268	0	816.268	40.1745	816.268	33.3923	816.268	82.174	816.268	-6.48528
	561.872	58.4619	817.219	-10.5028	817.219	7.05155	817.219	4.52414	817.219	7.13911	817.219	8.55376	817.219	14.724	817.219	50.1215	817.219	44.1741	817.219	-2.86651	817.219	0.96812	817.219	41.3305	817.219	34.3365	817.219	84.4152	817.219	-7.06635
	562.354	59.2056	818.171	-10.4322	818.171	6.52228	818.171	5.15281	818.171	7.98518	818.171	9.7319	818.171	15.6591	818.171	51.3621	818.171	45.7736	818.171	-3.15911	818.171	1.92429	818.171	42.5297	818.171	35.3443	818.171	86.7275	818.171	-7.55545
	562.836	61.1262	819.122	-10.2377	819.122	6.04793	819.122	5.85882	819.122	8.92759	819.122	11.0222	819.122	16.6549	819.122	52.6741	819.122	47.2436	819.122	-3.47906	819.122	2.88169	819.122	43.7856	819.122	36.4195	819.122	89.148	819.122	-8.01956
	563.318	64.4892	820.073	-9.93842	820.073	5.62697	820.073	6.67486	820.073	9.9477	820.073	12.4401	820.073	17.7347	820.073	54.0215	820.073	48.6418	820.073	-3.81609	820.073	3.85258	820.073	45.1165	820.073	37.5818	820.073	91.6755	820.073	-8.44958
	563.8	69.8376	821.024	-9.55791	821.024	5.25754	821.024	7.62592	821.024	11.0368	821.024	14.0019	821.024	18.9128	821.024	55.4044	821.024	49.9141	821.024	-4.15794	821.024	4.8504	821.024	46.5462	821.024	38.884	821.024	94.3016	821.024	-8.82603
	564.282	76.2575	821.976	-9.12266	821.976	4.93941	821.976	8.73082	821.976	12.2052	821.976	15.7147	821.976	20.2173	821.976	56.959	821.976	51.87	821.976	-4.49095	821.976	5.89896	821.976	48.0898	821.976	40.3595	821.976	97.0374	821.976	-9.13817
	564.764	82.6399	822.927	-8.64856	822.927	4.66869	822.927	9.99953	822.927	13.4615	822.927	17.5772	822.927	21.6246	822.927	58.6534	822.927	53.9283	822.927	-4.80039	822.927	7.0059	822.927	49.7522	822.927	41.945	822.927	99.8838	822.927	-9.38212
	565.247	88.6782	823.878	-8.12685	823.878	4.4542	823.878	11.435	823.878	14.8292	823.878	19.6236	823.878	23.1666	823.878	60.3345	823.878	54.7084	823.878	-5.02732	823.878	8.18929	823.878	51.5448	823.878	43.6788	823.878	102.843	823.878	-9.52606
	565.729	94.4091	824.829	-7.59766	824.829	4.30334	824.829	13.0133	824.829	16.3238	824.829	21.8503	824.829	24.8567	824.829	62.0142	824.829	55.5452	824.829	-5.12484	824.829	9.46482	824.829	53.4842	824.829	45.5867	824.829	105.92	824.829	-9.55908
	566.211	99.767	825.781	-7.07078	825.781	4.22341	825.781	14.7408	825.781	17.9588	825.781	24.2705	825.781	26.7103	825.781	63.6215	825.781	56.1949	825.781	-5.08688	825.781	10.8503	825.781	55.5897	825.781	47.6685	825.781	109.122	825.781	-9.47315
	566.693	105.608	826.732	-6.46477	826.732	4.22104	826.732	16.6418	826.732	19.7421	826.732	26.9049	826.732	28.761	826.732	65.2159	826.732	56.8223	826.732	-4.96766	826.732	12.3653	826.732	57.8816	826.732	49.8999	826.732	112.458	826.732	-9.25545
	567.175	113.025	827.683	-5.74379	827.683	4.3091	827.683	18.7319	827.683	21.6845	827.683	29.7896	827.683	31.0329	827.683	66.7696	827.683	57.3817	827.683	-4.77042	827.683	14.0199	827.683	60.3842	827.683	52.2881	827.683	115.931	827.683	-8.85144
	567.657	122.313	828.634	-4.88599	828.634	4.51568	828.634	21.0054	828.634	23.7879	828.634	32.9939	828.634	33.5564	828.634	68.2899	828.634	57.7018	828.634	-4.46465	828.634	15.8394	828.634	63.1198	828.634	54.8349	828.634	119.528	828.634	-8.2291
	568.139	132.633	829.585	-3.84195	829.585	4.87863	829.585	23.4881	829.585	26.0571	829.585	36.5309	829.585	36.3612	829.585	69.8955	829.585	57.4667	829.585	-4.01197	829.585	17.844	829.585	66.1136	829.585	57.5883	829.585	123.225	829.585	-7.3789
	568.621	143.71	830.537	-2.59426	830.537	5.42609	830.537	26.1856	830.537	28.4985	830.537	40.4152	830.537	39.4682	830.537	71.715	830.537	58.217	830.537	-3.38284	830.537	20.0515	830.537	69.3906	830.537	60.5994	830.537	126.999	830.537	-6.28747
	569.104	155.862	831.488	-1.15023	831.488	6.17712	831.488	29.1026	831.488	31.1217	831.488	44.6571	831.488	42.8992	831.488	73.7362	831.488	59.3328	831.488	-2.55685	831.488	22.4749	831.488	72.9753	831.488	63.9032	831.488	130.832	831.488	-4.95755
	569.586	169.391	832.439	0.50284	832.439	7.15871	832.439	32.2637	832.439	33.9491	832.439	49.2847	832.439	46.681	832.439	75.983	832.439	60.8152	832.439	-1.51715	832.439	25.1215	832.439	76.8853	832.439	67.5255	832.439	134.72	832.439	-3.4091
	570.068	184.274	833.39	2.37465	833.39	8.39069	833.39	35.6874	833.39	37.0142	833.39	54.2679	833.39	50.8016	833.39	78.5845	833.39	62.4874	833.39	-0.2834	833.39	28.0212	833.39	81.1463	833.39	71.4972	833.39	138.654	833.39	-1.64283
	570.55	200.525	834.341	4.46792	834.341	9.88683	834.341	39.359	834.341	40.3261	834.341	59.6504	834.341	55.234	834.341	81.6893	834.341	64.236	834.341	1.19797	834.341	31.1719	834.341	85.7729	834.341	75.8436	834.341	142.651	834.341	0.32255
	571.032	218.293	835.293	6.70902	835.293	11.6625	835.293	43.2749	835.293	43.8899	835.293	65.4287	835.293	59.9407	835.293	85.2267	835.293	67.1141	835.293	2.94602	835.293	34.5753	835.293	90.7788	835.293	80.6078	835.293	146.707	835.293	2.4655
	571.514	237.185	836.244	9.11976	836.244	13.7315	836.244	47.4339	836.244	47.7046	836.244	71.5906	836.244	64.8982	836.244	89.0316	836.244	70.6051	836.244	4.96031	836.244	38.2276	836.244	96.1764	836.244	85.8193	836.244	150.81	836.244	4.74808
	571.996	255.827	837.195	11.7527	837.195	16.0951	837.195	51.8303	837.195	51.7642	837.195	78.1107	837.195	70.1278	837.195	93.0601	837.195	75.991	837.195	7.23347	837.195	42.118	837.195	101.972	837.195	91.4901	837.195	154.946	837.195	7.12717
	572.478	273.972	838.146	14.6247	838.146	18.707	838.146	56.4548	838.146	56.0614	838.146	84.9327	838.146	75.6344	838.146	97.289	838.146	81.2874	838.146	9.7515	838.146	46.2313	838.146	108.155	838.146	97.6399	838.146	159.094	838.146	9.57233
	572.96	293.076	839.098	17.729	839.098	21.5431	839.098	61.2729	839.098	60.5924	839.098	92.0207	839.098	81.431	839.098	101.694	839.098	85.3878	839.098	12.502	839.098	50.5558	839.098	114.714	839.098	104.26	839.098	163.228	839.098	12.0377
	573.443	315.55	840.049	21.0625	840.049	24.5785	840.049	66.3053	840.049	65.3546	840.049	99.3022	840.049	87.5287	840.049	106.253	840.049	89.5154	840.049	15.4649	840.049	55.0979	840.049	121.649	840.049	111.398	840.049	167.35	840.049	14.4982
	573.925	341.136	841	24.6107	841	27.7933	841	71.504	841	70.3151	841	106.737	841	93.9104	841	111.005	841	92.7174	841	18.6432	841	59.8473	841	128.954	841	119.026	841	171.453	841	16.9284
	574.407	368.556	841.951	28.3504	841.951	31.1688	841.951	76.8301	841.951	75.4304	841.951	114.304	841.951	100.554	841.951	115.912	841.951	95.8868	841.951	22.0407	841.951	64.7979	841.951	136.615	841.951	127.074	841.951	175.525	841.951	19.3168
	574.889	396.452	842.902	32.2525	842.902	34.6865	842.902	82.2905	842.902	80.6732	842.902	121.975	842.902	107.431	842.902	120.987	842.902	98.7926	842.902	25.6396	842.902	69.9602	842.902	144.609	842.902	135.482	842.902	179.556	842.902	21.6606
	575.371	424.569	843.854	36.2833	843.854	38.3364	843.854	87.8739	843.854	86.0109	843.854	129.685	843.854	114.488	843.854	126.227	843.854	101.181	843.854	29.4227	843.854	75.2777	843.854	152.833	843.854	144.259	843.854	183.551	843.854	23.9354
	575.853	452.441	844.805	40.399	844.805	42.0983	844.805	93.5115	844.805	91.4317	844.805	137.391	844.805	121.698	844.805	131.621	844.805	103.216	844.805	33.3684	844.805	80.7152	844.805	161.28	844.805	153.398	844.805	187.515	844.805	26.1097
	576.335	480.822	845.756	44.5422	845.756	45.9519	845.756	99.1812	845.756	96.9073	845.756	145.062	845.756	129.006	845.756	137.191	845.756	106.633	845.756	37.4468	845.756	86.2357	845.756	169.939	845.756	162.846	845.756	191.448	845.756	28.1671
	576.817	510.103	846.707	48.6947	846.707	49.876	846.707	104.855	846.707	102.406	846.707	152.644	846.707	136.354	846.707	142.921	846.707	110.435	846.707	41.6258	846.707	91.8057	846.707	178.783	846.707	172.566	846.707	195.345	846.707	30.1161
	577.299	540.199	847.659	52.8508	847.659	53.8488	847.659	110.504	847.659	107.896	847.659	160.069	847.659	143.683	847.659	148.767	847.659	114.773	847.659	45.8712	847.659	97.3936	847.659	187.765	847.659	182.522	847.659	199.202	847.659	31.9744
	577.782	571.094	848.61	56.9889	848.61	57.8465	848.61	116.097	848.61	113.343	848.61	167.28	848.61	150.933	848.61	154.755	848.61	119.926	848.61	50.1462	848.61	102.97	848.61	196.821	848.61	192.653	848.61	203.02	848.61	33.7396
	578.264	603.222	849.561	61.0846	849.561	61.8478	849.561	121.589	849.561	118.662	849.561	174.222	849.561	158.078	849.561	160.862	849.561	125.699	849.561	54.4224	849.561	108.516	849.561	205.875	849.561	202.888	849.561	206.794	849.561	35.4208
	578.746	636.483	850.512	65.1189	850.512	65.8236	850.512	126.969	850.512	123.855	850.512	180.92	850.512	165.059	850.512	167.03	850.512	131.479	850.512	58.6643	850.512	114.013	850.512	214.864	850.512	213.134	850.512	210.502	850.512	37.0478
	579.228	669.823	851.463	69.0731	851.463	69.746	851.463	132.22	851.463	128.903	851.463	187.387	851.463	171.788	851.463	173.441	851.463	137.355	851.463	62.8367	851.463	119.433	851.463	223.583	851.463	223.297	851.463	214.126	851.463	38.6319
	579.71	702.203	852.415	72.9268	852.415	73.5889	852.415	137.325	852.415	133.779	852.415	193.618	852.415	178.235	852.415	179.863	852.415	142.295	852.415	66.9062	852.415	124.743	852.415	231.873	852.415	233.287	852.415	217.576	852.415	40.1692
	580.192	733.318	853.366	76.658	853.366	77.3278	853.366	142.263	853.366	138.454	853.366	199.586	853.366	184.423	853.366	186.383	853.366	147.539	853.366	70.8401	853.366	129.912	853.366	239.682	853.366	243.017	853.366	220.786	853.366	41.6512
	580.674	763.648	854.317	80.2463	854.317	80.938	854.317	147.028	854.317	142.904	854.317	205.254	854.317	190.301	854.317	193.012	854.317	152.815	854.317	74.6069	854.317	134.905	854.317	246.892	854.317	252.413	854.317	223.987	854.317	43.0753
	581.156	793.862	855.268	83.6732	855.268	84.4042	855.268	151.606	855.268	147.11	855.268	210.634	855.268	195.832	855.268	199.619	855.268	157.821	855.268	78.1722	855.268	139.701	855.268	253.627	855.268	261.419	855.268	227.218	855.268	44.4234
	581.639	824.233	856.219	86.9206	856.219	87.7071	856.219	155.976	856.219	151.061	856.219	215.739	856.219	201.015	856.219	205.84	856.219	163.129	856.219	81.5088	856.219	144.281	856.219	259.851	856.219	269.974	856.219	230.513	856.219	45.7535
	582.121	854.556	857.171	89.9671	857.171	90.8235	857.171	160.117	857.171	154.759	857.171	220.563	857.171	205.855	857.171	211.554	857.171	167.395	857.171	84.5911	857.171	148.627	857.171	265.539	857.171	278.028	857.171	233.922	857.171	47.0714
	582.603	884.666	858.122	92.7904	858.122	93.7288	858.122	164.016	858.122	158.206	858.122	225.094	858.122	210.353	858.122	216.665	858.122	171.271	858.122	87.3959	858.122	152.721	858.122	270.673	858.122	285.501	858.122	237.479	858.122	48.3717
	583.085	914.675	859.073	95.3674	859.073	96.3976	859.073	167.668	859.073	161.405	859.073	229.323	859.073	214.495	859.073	221.274	859.073	174.668	859.073	89.9017	859.073	156.541	859.073	275.231	859.073	292.292	859.073	241.185	859.073	49.6702
	583.567	944.272	860.024	97.6694	860.024	98.799	860.024	171.059	860.024	164.334	860.024	233.209	860.024	218.243	860.024	225.238	860.024	177.6	860.024	92.0794	860.024	160.07	860.024	279.227	860.024	298.483	860.024	245.06	860.024	50.9574
	584.049	972.771	860.976	99.6758	860.976	100.899	860.976	174.15	860.976	166.983	860.976	236.754	860.976	221.592	860.976	228.369	860.976	180.028	860.976	93.9279	860.976	163.295	860.976	282.679	860.976	304.054	860.976	249.096	860.976	52.2417
	584.531	999.632	861.927	101.366	861.927	102.67	861.927	176.953	861.927	169.341	861.927	239.96	861.927	224.571	861.927	230.882	861.927	181.256	861.927	95.4427	861.927	166.21	861.927	285.593	861.927	308.995	861.927	253.287	861.927	53.5354
	585.013	1025.16	862.878	102.723	862.878	104.096	862.878	179.47	862.878	171.397	862.878	242.819	862.878	227.206	862.878	232.45	862.878	181.486	862.878	96.6227	862.878	168.801	862.878	287.981	862.878	313.288	862.878	257.618	862.878	54.8415
	585.495	1050.38	863.829	103.711	863.829	105.162	863.829	181.69	863.829	173.141	863.829	245.328	863.829	229.508	863.829	233.181	863.829	181.589	863.829	97.4701	863.829	171.054	863.829	289.858	863.829	316.92	863.829	262.04	863.829	56.1511
	585.978	1076.08	864.781	104.258	864.781	105.85	864.781	183.597	864.781	174.575	864.781	247.481	864.781	231.45	864.781	233.121	864.781	181.093	864.781	97.9892	864.781	172.955	864.781	291.244	864.781	319.896	864.781	266.444	864.781	57.4432
	586.46	1101.63	865.732	104.383	865.732	106.148	865.732	185.229	865.732	175.702	865.732	249.298	865.732	233.044	865.732	232.279	865.732	179.86	865.732	98.1844	865.732	174.513	865.732	292.197	865.732	322.215	865.732	270.862	865.732	58.679
	586.942	1125.85	866.683	104.072	866.683	106.048	866.683	186.593	866.683	176.518	866.683	250.749	866.683	234.271	866.683	230.623	866.683	178.284	866.683	98.057	866.683	175.73	866.683	292.72	866.683	323.87	866.683	275.256	866.683	59.8206
	587.424	1148.92	867.634	103.322	867.634	105.544	867.634	187.673	867.634	177.017	867.634	251.839	867.634	235.118	867.634	228.32	867.634	176.347	867.634	97.6087	867.634	176.607	867.634	292.832	867.634	324.867	867.634	279.578	867.634	60.8744
	587.906	1171.8	868.585	102.138	868.585	104.637	868.585	188.456	868.585	177.198	868.585	252.57	868.585	235.587	868.585	225.042	868.585	174.142	868.585	96.8431	868.585	177.149	868.585	292.552	868.585	325.223	868.585	283.778	868.585	61.8538
	588.388	1193.22	869.537	100.535	869.537	103.33	869.537	188.935	869.537	177.06	869.537	252.946	869.537	235.684	869.537	221.317	869.537	171.594	869.537	95.7666	869.537	177.363	869.537	291.901	869.537	324.954	869.537	287.811	869.537	62.761
	588.87	1212.72	870.488	98.544	870.488	101.631	870.488	189.108	870.488	176.608	870.488	252.998	870.488	235.397	870.488	217.345	870.488	168.846	870.488	94.3893	870.488	177.247	870.488	290.911	870.488	324.07	870.488	291.63	870.488	63.5877
	589.352	1230.45	871.439	96.2025	871.439	99.549	871.439	188.992	871.439	175.848	871.439	252.739	871.439	234.828	871.439	213.272	871.439	166.04	871.439	92.7329	871.439	176.832	871.439	289.625	871.439	322.65	871.439	295.201	871.439	64.3425
	589.835	1247.27	872.39	93.5309	872.39	97.1137	872.39	188.582	872.39	174.799	872.39	252.203	872.39	234.062	872.39	209.292	872.39	163.179	872.39	90.7872	872.39	176.132	872.39	288.08	872.39	320.694	872.39	298.505	872.39	65.0238
	590.317	1263.54	873.341	90.6149	873.341	94.3572	873.341	187.894	873.341	173.481	873.341	251.438	873.341	233.141	873.341	205.374	873.341	160.513	873.341	88.5275	873.341	175.167	873.341	286.313	873.341	318.217	873.341	301.517	873.341	65.6065
	590.799	1280.38	874.293	87.5316	874.293	91.3206	874.293	186.948	874.293	171.901	874.293	250.487	874.293	232.084	874.293	201.826	874.293	157.943	874.293	85.9612	874.293	173.952	874.293	284.355	874.293	315.267	874.293	304.208	874.293	65.9868
	591.281	1299.16	875.244	84.2639	875.244	88.0598	875.244	185.757	875.244	170.075	875.244	249.382	875.244	230.889	875.244	198.63	875.244	155.59	875.244	83.1692	875.244	172.5	875.244	282.24	875.244	311.934	875.244	306.542	875.244	66.1601
	591.763	1321.6	876.195	80.8258	876.195	84.6467	876.195	184.344	876.195	168.071	876.195	248.146	876.195	229.563	876.195	195.764	876.195	153.547	876.195	80.2031	876.195	170.833	876.195	280.002	876.195	308.286	876.195	308.48	876.195	66.0755
	592.245	1340.65	877.146	77.2457	877.146	81.1823	877.146	182.748	877.146	165.923	877.146	246.764	877.146	228.095	877.146	193.188	877.146	151.702	877.146	77.0844	877.146	168.961	877.146	277.676	877.146	304.401	877.146	309.981	877.146	65.7212
	592.727	1358.46	878.098	73.5112	878.098	77.6756	878.098	180.97	878.098	163.666	878.098	245.249	878.098	226.481	878.098	190.812	878.098	149.296	878.098	73.8245	878.098	166.905	878.098	275.295	878.098	300.324	878.098	311.033	878.098	65.0757
	593.209	1376.98	879.049	69.6342	879.049	74.1147	879.049	179.041	879.049	161.336	879.049	243.626	879.049	224.718	879.049	188.567	879.049	147.195	879.049	70.4322	879.049	164.687	879.049	272.897	879.049	296.095	879.049	311.647	879.049	64.1148
	593.692	1399.53	880	65.6539	880	70.4921	880	176.98	880	158.971	880	241.922	880	222.773	880	186.434	880	145.551	880	66.9204	880	162.331	880	270.509	880	291.766	880	311.84	880	62.8157
	594.174	1421.19	880.951	61.5908	880.951	66.7975	880.951	174.765	880.951	156.598	880.951	240.126	880.951	220.598	880.951	184.355	880.951	144.039	880.951	63.3032	880.951	159.859	880.951	268.151	880.951	287.398	880.951	311.625	880.951	61.1732
	594.656	1443.66	881.902	57.4547	881.902	63.016	881.902	172.402	881.902	154.226	881.902	238.286	881.902	218.323	881.902	182.32	881.902	142.442	881.902	59.6298	881.902	157.279	881.902	265.828	881.902	283.042	881.902	311.031	881.902	59.2178
	595.138	1466.88	882.854	53.2683	882.854	59.1146	882.854	169.912	882.854	151.875	882.854	236.402	882.854	216.003	882.854	180.337	882.854	140.759	882.854	55.8772	882.854	154.633	882.854	263.558	882.854	278.726	882.854	310.039	882.854	56.9716
	595.62	1489.57	883.805	49.0507	883.805	55.0773	883.805	167.335	883.805	149.563	883.805	234.451	883.805	213.706	883.805	178.213	883.805	139.376	883.805	52.0485	883.805	151.922	883.805	261.359	883.805	274.48	883.805	308.647	883.805	54.454
	596.102	1512.44	884.756	44.8201	884.756	50.9143	884.756	164.7	884.756	147.308	884.756	232.437	884.756	211.476	884.756	176.009	884.756	137.731	884.756	48.1596	884.756	149.17	884.756	259.234	884.756	270.332	884.756	306.852	884.756	51.6905
	596.584	1536.63	885.707	40.5948	885.707	46.6483	885.707	162.027	885.707	145.124	885.707	230.363	885.707	209.308	885.707	173.718	885.707	135.723	885.707	44.2294	885.707	146.406	885.707	257.181	885.707	266.31	885.707	304.658	885.707	48.6979
	597.066	1563.08	886.659	36.3861	886.659	42.3396	886.659	159.324	886.659	143.018	886.659	228.231	886.659	207.219	886.659	171.365	886.659	133.382	886.659	40.2824	886.659	143.645	886.659	255.21	886.659	262.42	886.659	302.078	886.659	45.4698
	597.548	1592.42	887.61	32.2053	887.61	38.0348	887.61	156.619	887.61	140.997	887.61	226.023	887.61	205.202	887.61	168.954	887.61	130.958	887.61	36.3399	887.61	140.919	887.61	253.333	887.61	258.684	887.61	299.142	887.61	42.0135
	598.031	1622.67	888.561	28.064	888.561	33.7657	888.561	153.936	888.561	139.059	888.561	223.763	888.561	203.27	888.561	166.453	888.561	128.886	888.561	32.4367	888.561	138.228	888.561	251.55	888.561	255.088	888.561	295.881	888.561	38.3518
	598.513	1652.9	889.512	23.9807	889.512	29.578	889.512	151.33	889.512	137.217	889.512	221.476	889.512	201.421	889.512	163.697	889.512	127.003	889.512	28.6168	889.512	135.591	889.512	249.876	889.512	251.632	889.512	292.346	889.512	34.5006
	598.995	1682.72	890.463	19.978	890.463	25.5171	890.463	148.859	890.463	135.498	890.463	219.197	890.463	199.673	890.463	160.683	890.463	125.366	890.463	24.9112	890.463	133.02	890.463	248.312	890.463	248.363	890.463	288.604	890.463	30.5105
	599.477	1713.03	891.415	16.0834	891.415	21.6286	891.415	146.547	891.415	133.912	891.415	216.959	891.415	198.052	891.415	157.517	891.415	123.804	891.415	21.3056	891.415	130.512	891.415	246.855	891.415	245.337	891.415	284.718	891.415	26.4436
	599.959	1744.52	892.366	12.3303	892.366	17.9491	892.366	144.424	892.366	132.473	892.366	214.792	892.366	196.571	892.366	154.261	892.366	122.005	892.366	17.7052	892.366	128.139	892.366	245.585	892.366	242.542	892.366	280.751	892.366	22.3503
	600.441	1778.54	893.317	8.75378	893.317	14.5212	893.317	142.536	893.317	131.192	893.317	212.781	893.317	195.256	893.317	150.97	893.317	119.895	893.317	14.1581	893.317	125.882	893.317	244.436	893.317	239.988	893.317	276.766	893.317	18.3136
	600.923	1815.21	894.268	5.40943	894.268	11.3766	894.268	140.951	894.268	130.077	894.268	210.967	894.268	194.154	894.268	147.698	894.268	117.938	894.268	10.729	894.268	123.783	894.268	243.376	894.268	237.719	894.268	272.816	894.268	14.3781
	601.405	1854.4	895.219	2.32638	895.219	8.53462	895.219	139.684	895.219	129.169	895.219	209.399	895.219	193.316	895.219	144.357	895.219	115.829	895.219	7.47593	895.219	121.888	895.219	242.36	895.219	235.699	895.219	268.951	895.219	10.5832
	601.888	1894.97	896.171	-0.47115	896.171	6.00952	896.171	138.744	896.171	128.483	896.171	208.138	896.171	192.791	896.171	141.095	896.171	113.262	896.171	4.45629	896.171	120.241	896.171	241.365	896.171	233.866	896.171	265.224	896.171	6.96647
	602.37	1935.95	897.122	-2.71479	897.122	3.81641	897.122	138.136	897.122	128.021	897.122	207.238	897.122	192.617	897.122	137.869	897.122	110.707	897.122	1.72447	897.122	118.883	897.122	240.389	897.122	232.191	897.122	261.68	897.122	3.57426
	602.852	1976.89	898.073	-1.21115	898.073	1.96619	898.073	137.87	898.073	127.859	898.073	206.8	898.073	192.804	898.073	134.853	898.073	108.403	898.073	-0.68125	898.073	117.852	898.073	239.437	898.073	230.687	898.073	258.364	898.073	0.43763
	603.334	2018.89	899.024	0.65988	899.024	1.48438	899.024	137.965	899.024	127.999	899.024	206.827	899.024	193.387	899.024	132.223	899.024	106.379	899.024	-2.1673	899.024	117.189	899.024	238.509	899.024	229.425	899.024	255.337	899.024	-2.39114
	603.816	2062.95	899.976	2.92575	899.976	4.0572	899.976	138.433	899.976	128.448	899.976	207.324	899.976	194.432	899.976	129.896	899.976	104.448	899.976	-1.64355	899.976	116.936	899.976	237.783	899.976	228.47	899.976	252.661	899.976	-4.86196
	604.298	2108.32	900.927	5.61036	900.927	7.03361	900.927	139.274	900.927	129.209	900.927	208.331	900.927	195.974	900.927	128.36	900.927	103.323	900.927	-0.58249	900.927	117.151	900.927	237.435	900.927	227.887	900.927	250.394	900.927	-6.90287
	604.78	2153.66	901.878	8.73035	901.878	10.4302	901.878	140.505	901.878	130.298	901.878	209.884	901.878	197.996	901.878	127.739	901.878	103.219	901.878	1.05771	901.878	117.89	901.878	237.561	901.878	227.715	901.878	248.6	901.878	-8.43796
	605.262	2198.67	902.829	12.2953	902.829	14.2579	902.829	142.147	902.829	131.738	902.829	212.01	902.829	200.553	902.829	127.949	902.829	103.862	902.829	3.30006	902.829	119.211	902.829	238.33	902.829	228.008	902.829	247.334	902.829	-9.40586
	605.744	2243.48	903.781	16.3066	903.781	18.5181	903.781	144.192	903.781	133.556	903.781	214.711	903.781	203.679	903.781	128.977	903.781	105.281	903.781	6.11027	903.781	121.159	903.781	239.659	903.781	228.883	903.781	246.645	903.781	-9.7447
	606.227	2287.88	904.732	20.7614	904.732	23.2057	904.732	146.621	904.732	135.778	904.732	217.995	904.732	207.361	904.732	130.875	904.732	107.537	904.732	9.59815	904.732	123.746	904.732	241.597	904.732	230.425	904.732	246.593	904.732	-9.42556
	606.709	2331.95	905.683	25.6418	905.683	28.3092	905.683	149.429	905.683	138.408	905.683	221.847	905.683	211.585	905.683	133.751	905.683	109.903	905.683	13.7684	905.683	126.983	905.683	244.187	905.683	232.812	905.683	247.209	905.683	-8.44673
	607.191	2376.55	906.634	30.9243	906.634	33.8096	906.634	152.601	906.634	141.429	906.634	226.242	906.634	216.316	906.634	137.646	906.634	112.863	906.634	18.6239	906.634	130.946	906.634	247.447	906.634	236.075	906.634	248.52	906.634	-6.78252
	607.673	2421.2	907.585	36.584	907.585	39.6879	907.585	156.106	907.585	144.816	907.585	231.149	907.585	221.53	907.585	142.49	907.585	117.29	907.585	24.1565	907.585	135.609	907.585	251.39	907.585	240.291	907.585	250.537	907.585	-4.41387
	608.155	2464.85	908.537	42.6049	908.537	45.9207	908.537	159.912	908.537	148.539	908.537	236.54	908.537	227.232	908.537	148.498	908.537	122.012	908.537	30.3577	908.537	140.869	908.537	256.006	908.537	245.359	908.537	253.258	908.537	-1.33034
	608.637	2507.16	909.488	48.9591	909.488	52.4783	909.488	163.988	909.488	152.564	909.488	242.332	909.488	233.38	909.488	155.571	909.488	126.551	909.488	37.1591	909.488	146.669	909.488	261.275	909.488	251.266	909.488	256.685	909.488	2.46659
	609.119	2549.1	910.439	55.5963	910.439	59.3368	910.439	168.298	910.439	156.862	910.439	248.468	910.439	239.9	910.439	163.387	910.439	131.408	910.439	44.5123	910.439	152.971	910.439	267.144	910.439	257.966	910.439	260.849	910.439	6.96768
	609.601	2592.3	911.39	62.4849	911.39	66.4519	911.39	172.801	911.39	161.397	911.39	254.893	911.39	246.703	911.39	172.065	911.39	138.066	911.39	52.3481	911.39	159.728	911.39	273.575	911.39	265.413	911.39	265.799	911.39	12.149
	610.083	2636.51	912.341	69.5972	912.341	73.7735	912.341	177.457	912.341	166.123	912.341	261.579	912.341	253.708	912.341	181.079	912.341	143.796	912.341	60.5857	912.341	166.883	912.341	280.52	912.341	273.549	912.341	271.475	912.341	17.9747
	610.566	2680.65	913.293	76.9056	913.293	81.2512	913.293	182.21	913.293	170.984	913.293	268.47	913.293	260.883	913.293	191.669	913.293	151.212	913.293	69.1398	913.293	174.38	913.293	287.921	913.293	282.306	913.293	277.835	913.293	24.4115
	611.048	2723.32	914.244	84.3691	914.244	88.8357	914.244	186.993	914.244	175.916	914.244	275.486	914.244	268.183	914.244	203.935	914.244	159.436	914.244	77.9171	914.244	182.145	914.244	295.68	914.244	291.637	914.244	284.844	914.244	31.4531
	611.53	2765.83	915.195	91.956	915.195	96.4766	915.195	191.746	915.195	180.855	915.195	282.574	915.195	275.558	915.195	217.546	915.195	168.66	915.195	86.8063	915.195	190.103	915.195	303.742	915.195	301.463	915.195	292.473	915.195	39.0952
	612.012	2809.02	916.146	99.6178	916.146	104.12	916.146	196.437	916.146	185.745	916.146	289.691	916.146	282.96	916.146	231.957	916.146	180.379	916.146	95.6919	916.146	198.167	916.146	312.047	916.146	311.732	916.146	300.689	916.146	47.3275
	612.494	2851.53	917.098	107.305	917.098	111.719	917.098	201.036	917.098	190.532	917.098	296.794	917.098	290.34	917.098	246.865	917.098	192.622	917.098	104.553	917.098	206.208	917.098	320.529	917.098	322.338	917.098	309.45	917.098	56.0853
	612.976	2892.58	918.049	114.971	918.049	119.223	918.049	205.505	918.049	195.17	918.049	303.831	918.049	297.646	918.049	261.523	918.049	204.817	918.049	113.314	918.049	214.161	918.049	329.103	918.049	333.179	918.049	318.702	918.049	65.2864
	613.458	2932.27	919	122.568	919	126.585	919	209.805	919	199.612	919	310.746	919	304.844	919	276.283	919	216.919	919	121.907	919	221.972	919	337.679	919	344.163	919	328.392	919	74.8628
	613.94	2971.82	919.951	130.044	919.951	133.78	919.951	213.887	919.951	203.803	919.951	317.536	919.951	311.835	919.951	290.886	919.951	229.001	919.951	130.258	919.951	229.563	919.951	346.151	919.951	355.176	919.951	338.448	919.951	84.7392
	614.423	3011.53	920.902	137.359	920.902	140.77	920.902	217.733	920.902	207.664	920.902	324.153	920.902	318.517	920.902	305.107	920.902	240.759	920.902	138.253	920.902	236.854	920.902	354.425	920.902	366.099	920.902	348.793	920.902	94.8277
	614.905	3052.25	921.854	144.47	921.854	147.526	921.854	221.302	921.854	211.228	921.854	330.528	921.854	324.821	921.854	318.861	921.854	251.487	921.854	145.892	921.854	243.784	921.854	362.414	921.854	376.789	921.854	359.37	921.854	105.067
	615.387	3094.93	922.805	151.333	922.805	154.02	922.805	224.554	922.805	214.474	922.805	336.575	922.805	330.684	922.805	330.96	922.805	261.575	922.805	153.113	922.805	250.291	922.805	370.04	922.805	387.192	922.805	370.083	922.805	115.465
	615.869	3138.57	923.756	157.906	923.756	160.214	923.756	227.46	923.756	217.404	923.756	342.255	923.756	336.053	923.756	342.675	923.756	270.713	923.756	159.872	923.756	256.31	923.756	377.225	923.756	397.212	923.756	380.827	923.756	125.988
	616.351	3179.4	924.707	164.143	924.707	166.048	924.707	229.988	924.707	219.962	924.707	347.5	924.707	340.879	924.707	350.24	924.707	278.624	924.707	166.119	924.707	261.792	924.707	383.879	924.707	406.747	924.707	391.494	924.707	136.58
	616.833	3223.28	925.659	169.99	925.659	171.407	925.659	232.086	925.659	222.13	925.659	352.276	925.659	345.128	925.659	356.893	925.659	283.769	925.659	171.802	925.659	266.703	925.659	389.916	925.659	415.712	925.659	401.997	925.659	147.15
	617.315	3269.4	926.61	175.403	926.61	176.239	926.61	233.742	926.61	223.886	926.61	356.61	926.61	348.784	926.61	363.427	926.61	285.401	926.61	176.868	926.61	270.994	926.61	395.248	926.61	424.019	926.61	412.256	926.61	157.621
	617.797	3317.12	927.561	180.333	927.561	180.522	927.561	234.913	927.561	225.219	927.561	360.479	927.561	351.859	927.561	364.84	927.561	284.557	927.561	181.275	927.561	274.624	927.561	399.793	927.561	431.595	927.561	422.192	927.561	167.874
	618.279	3362.72	928.512	184.746	928.512	184.243	928.512	235.581	928.512	226.122	928.512	363.843	928.512	354.412	928.512	364.377	928.512	284.703	928.512	184.997	928.512	277.556	928.512	403.497	928.512	438.348	928.512	431.736	928.512	177.881
	618.762	3410.2	929.463	188.615	929.463	187.397	929.463	235.765	929.463	226.59	929.463	366.669	929.463	356.512	929.463	362.173	929.463	282.953	929.463	188.017	929.463	279.766	929.463	406.33	929.463	444.205	929.463	440.83	929.463	187.608
	619.244	3457.49	930.415	191.93	930.415	189.995	930.415	235.47	930.415	226.621	930.415	368.94	930.415	358.07	930.415	358.726	930.415	280.262	930.415	190.324	930.415	281.254	930.415	408.279	930.415	449.118	930.415	449.412	930.415	197.006
	619.726	3504.27	931.366	194.671	931.366	192.085	931.366	234.711	931.366	226.218	931.366	370.618	931.366	359.06	931.366	354.212	931.366	276.68	931.366	191.916	931.366	282.018	931.366	409.328	931.366	453.051	931.366	457.419	931.366	206.039
	620.208	3551.68	932.317	196.821	932.317	193.705	932.317	233.481	932.317	225.387	932.317	371.679	932.317	359.479	932.317	348.733	932.317	272.121	932.317	192.792	932.317	282.082	932.317	409.471	932.317	455.959	932.317	464.797	932.317	214.66
	620.69	3599.23	933.268	198.38	933.268	194.863	933.268	231.782	933.268	224.134	933.268	372.079	933.268	359.325	933.268	342.388	933.268	266.693	933.268	192.96	933.268	281.457	933.268	408.716	933.268	457.832	933.268	471.494	933.268	222.803
	621.172	3648.67	934.219	199.353	934.219	195.556	934.219	229.621	934.219	222.47	934.219	371.804	934.219	358.595	934.219	335.241	934.219	260.305	934.219	192.439	934.219	280.162	934.219	407.089	934.219	458.656	934.219	477.464	934.219	230.398
	621.654	3702.06	935.171	199.762	935.171	195.797	935.171	227.016	935.171	220.408	935.171	370.868	935.171	357.315	935.171	327.645	935.171	253.812	935.171	191.265	935.171	278.243	935.171	404.646	935.171	458.451	935.171	482.667	935.171	237.4
	622.136	3757.65	936.122	199.64	936.122	195.599	936.122	224.002	936.122	217.963	936.122	369.303	936.122	355.51	936.122	319.605	936.122	247.444	936.122	189.485	936.122	275.739	936.122	401.442	936.122	457.257	936.122	487.089	936.122	243.777
	622.619	3813.35	937.073	199.019	937.073	195.004	937.073	220.613	937.073	215.139	937.073	367.128	937.073	353.197	937.073	311.287	937.073	240.957	937.073	187.15	937.073	272.701	937.073	397.537	937.073	455.091	937.073	490.719	937.073	249.506
	623.101	3867.35	938.024	197.942	938.024	194.041	938.024	216.872	938.024	211.955	938.024	364.353	938.024	350.423	938.024	302.95	938.024	234.37	938.024	184.276	938.024	269.169	938.024	393.002	938.024	452.007	938.024	493.539	938.024	254.61
	623.583	3921.65	938.976	196.455	938.976	192.741	938.976	212.807	938.976	208.438	938.976	361.1	938.976	347.227	938.976	294.917	938.976	228.376	938.976	180.884	938.976	265.197	938.976	387.94	938.976	448.039	938.976	495.535	938.976	259.117
	624.065	3977.25	939.927	194.611	939.927	191.137	939.927	208.458	939.927	204.618	939.927	357.454	939.927	343.651	939.927	288.652	939.927	222.89	939.927	177.055	939.927	260.83	939.927	382.437	939.927	443.248	939.927	496.704	939.927	262.985
	624.547	4034.44	940.878	192.448	940.878	189.253	940.878	203.845	940.878	200.528	940.878	353.441	940.878	339.743	940.878	283.178	940.878	218.672	940.878	172.982	940.878	256.094	940.878	376.573	940.878	437.699	940.878	497.041	940.878	266.202
	625.029	4092.43	941.829	190.005	941.829	187.11	941.829	198.983	941.829	196.198	941.829	349.093	941.829	335.54	941.829	277.787	941.829	215.472	941.829	168.738	941.829	251.106	941.829	370.492	941.829	431.458	941.829	496.532	941.829	268.75
	625.511	4150.2	942.781	187.289	942.781	184.73	942.781	193.851	942.781	191.663	942.781	344.469	942.781	331.075	942.781	272.45	942.781	212.361	942.781	164.382	942.781	245.928	942.781	364.326	942.781	424.556	942.781	495.168	942.781	270.664
	625.993	4207.16	943.732	184.33	943.732	182.146	943.732	188.465	943.732	186.926	943.732	339.548	943.732	326.392	943.732	267.241	943.732	208.83	943.732	159.974	943.732	240.615	943.732	358.246	943.732	417.08	943.732	492.954	943.732	271.966
	626.476	4263.9	944.683	181.158	944.683	179.399	944.683	182.845	944.683	182.013	944.683	334.363	944.683	321.521	944.683	262.011	944.683	205.466	944.683	155.574	944.683	235.206	944.683	352.229	944.683	409.158	944.683	489.9	944.683	272.634
	626.958	4321.02	945.634	177.807	945.634	176.533	945.634	177.018	945.634	176.969	945.634	328.957	945.634	316.517	945.634	256.894	945.634	201.739	945.634	151.231	945.634	229.758	945.634	346.341	945.634	400.905	945.634	486.027	945.634	272.704
	627.44	4378.25	946.585	174.303	946.585	173.583	946.585	171.004	946.585	171.83	946.585	323.36	946.585	311.394	946.585	251.821	946.585	198.353	946.585	147.015	946.585	224.336	946.585	340.711	946.585	392.421	946.585	481.369	946.585	272.217
	627.922	4433.98	947.537	170.669	947.537	170.577	947.537	164.82	947.537	166.608	947.537	317.6	947.537	306.192	947.537	246.875	947.537	195.192	947.537	143.018	947.537	218.983	947.537	335.37	947.537	383.778	947.537	475.966	947.537	271.165
	628.404	4486.34	948.488	166.92	948.488	167.536	948.488	158.476	948.488	161.323	948.488	311.726	948.488	300.963	948.488	242.108	948.488	192.082	948.488	139.184	948.488	213.742	948.488	330.31	948.488	375.047	948.488	469.861	948.488	269.568
	628.886	4534.85	949.439	163.074	949.439	164.469	949.439	151.985	949.439	156.018	949.439	305.765	949.439	295.743	949.439	237.545	949.439	188.952	949.439	135.524	949.439	208.648	949.439	325.567	949.439	366.29	949.439	463.108	949.439	267.437
	629.368	4580.63	950.39	159.143	950.39	161.381	950.39	145.349	950.39	150.715	950.39	299.732	950.39	290.54	950.39	233.187	950.39	185.945	950.39	132.05	950.39	203.736	950.39	321.105	950.39	357.596	950.39	455.76	950.39	264.817
	629.85	4624.97	951.341	155.139	951.341	158.271	951.341	138.564	951.341	145.436	951.341	293.626	951.341	285.355	951.341	229.086	951.341	183.384	951.341	128.776	951.341	199.02	951.341	316.901	951.341	349.044	951.341	447.87	951.341	261.717
	630.332	4668.33	952.293	151.075	952.293	155.142	952.293	131.642	952.293	140.182	952.293	287.489	952.293	280.174	952.293	225.096	952.293	180.849	952.293	125.764	952.293	194.494	952.293	312.942	952.293	340.636	952.293	439.49	952.293	258.152
	630.814	4709.88	953.244	146.955	953.244	151.998	953.244	124.618	953.244	134.955	953.244	281.321	953.244	274.99	953.244	221.149	953.244	178.509	953.244	122.915	953.244	190.17	953.244	309.203	953.244	332.38	953.244	430.661	953.244	254.146
	631.297	4747.74	954.195	142.787	954.195	148.84	954.195	117.513	954.195	129.751	954.195	275.131	954.195	269.784	954.195	217.24	954.195	176.05	954.195	120.208	954.195	186.052	954.195	305.641	954.195	324.151	954.195	421.464	954.195	249.746
	631.779	4780.24	955.146	138.587	955.146	145.672	955.146	110.343	955.146	124.564	955.146	268.932	955.146	264.546	955.146	213.371	955.146	173.131	955.146	117.606	955.146	182.038	955.146	302.231	955.146	315.976	955.146	411.991	955.146	244.958
	632.261	4807.46	956.098	134.365	956.098	142.489	956.098	103.116	956.098	119.388	956.098	262.716	956.098	259.253	956.098	209.534	956.098	169.71	956.098	115.074	956.098	178.097	956.098	298.952	956.098	307.898	956.098	402.332	956.098	239.808
	632.743	4831.3	957.049	130.134	957.049	139.279	957.049	95.8432	957.049	114.213	957.049	256.548	957.049	253.893	957.049	205.839	957.049	166.932	957.049	112.578	957.049	174.271	957.049	295.774	957.049	299.907	957.049	392.557	957.049	234.37
	633.225	4851.52	958	125.912	958	136.039	958	88.5459	958	109.027	958	250.455	958	248.476	958	202.286	958	164.274	958	110.093	958	170.563	958	292.662	958	291.995	958	382.726	958	228.705
	633.707	4866.37	958.951	121.742	958.951	132.752	958.951	81.2227	958.951	103.81	958.951	244.445	958.951	242.999	958.951	198.903	958.951	161.959	958.951	107.575	958.951	166.929	958.951	289.615	958.951	284.177	958.951	372.855	958.951	222.822
	634.189	4873.62	959.902	117.642	959.902	129.408	959.902	73.8792	959.902	98.5402	959.902	238.505	959.902	237.463	959.902	195.845	959.902	159.945	959.902	104.997	959.902	163.327	959.902	286.611	959.902	276.463	959.902	362.909	959.902	216.744
	634.671	4873.24	960.854	113.615	960.854	125.996	960.854	66.5312	960.854	93.202	960.854	232.561	960.854	231.88	960.854	193.029	960.854	157.758	960.854	102.341	960.854	159.727	960.854	283.637	960.854	268.868	960.854	352.957	960.854	210.521
	635.154	4866.3	961.805	109.661	961.805	122.503	961.805	59.1895	961.805	87.7828	961.805	226.589	961.805	226.236	961.805	190.016	961.805	154.639	961.805	99.591	961.805	156.095	961.805	280.683	961.805	261.385	961.805	343.052	961.805	204.183
	635.636	4855.41	962.756	105.774	962.756	118.919	962.756	51.8748	962.756	82.2769	962.756	220.586	962.756	220.535	962.756	186.703	962.756	151.996	962.756	96.7459	962.756	152.391	962.756	277.724	962.756	254.006	962.756	333.223	962.756	197.802
	636.118	4840.7	963.707	101.876	963.707	115.234	963.707	44.5946	963.707	76.6872	963.707	214.559	963.707	214.799	963.707	181.338	963.707	147.984	963.707	93.8328	963.707	148.588	963.707	274.732	963.707	246.723	963.707	323.493	963.707	191.431
	636.6	4820.94	964.659	97.9518	964.659	111.451	964.659	37.3412	964.659	71.0174	964.659	208.51	964.659	209.037	964.659	174.963	964.659	143.212	964.659	90.904	964.659	144.677	964.659	271.67	964.659	239.512	964.659	313.874	964.659	185.104
	637.082	4794.65	965.61	93.9787	965.61	107.569	965.61	30.1079	965.61	65.2715	965.61	202.441	965.61	203.249	965.61	167.837	965.61	137.75	965.61	87.9194	965.61	140.704	965.61	268.499	965.61	232.372	965.61	304.382	965.61	178.874
	637.564	4761.86	966.561	89.9201	966.561	103.595	966.561	22.894	966.561	59.4542	966.561	196.356	966.561	197.43	966.561	160.082	966.561	131.728	966.561	84.8876	966.561	136.66	966.561	265.188	966.561	225.278	966.561	295.029	966.561	172.79
	638.046	4723.76	967.512	85.8012	967.512	99.5443	967.512	15.7102	967.512	53.5731	967.512	190.229	967.512	191.567	967.512	151.809	967.512	125.459	967.512	81.8093	967.512	132.523	967.512	261.703	967.512	218.211	967.512	285.819	967.512	166.875
	638.528	4681.55	968.463	81.6234	968.463	95.4308	968.463	8.55282	968.463	47.6527	968.463	184.012	968.463	185.645	968.463	142.746	968.463	118.924	968.463	78.6888	968.463	128.3	968.463	258.03	968.463	211.149	968.463	276.732	968.463	161.13
	639.01	4635.79	969.415	77.4381	969.415	91.2625	969.415	5.55172	969.415	41.755	969.415	177.781	969.415	179.645	969.415	133.722	969.415	112.309	969.415	75.5803	969.415	123.997	969.415	254.091	969.415	204.067	969.415	267.76	969.415	155.533
	639.493	4585.96	970.366	73.2707	970.366	87.0482	970.366	3.7132	970.366	35.824	970.366	171.543	970.366	173.551	970.366	125.149	970.366	105.664	970.366	72.4274	970.366	119.604	970.366	249.834	970.366	196.996	970.366	258.844	970.366	150.051
	639.975	4530.81	971.317	69.1759	971.317	82.7967	971.317	1.8823	971.317	29.8735	971.317	165.318	971.317	167.379	971.317	117.198	971.317	98.8953	971.317	69.2271	971.317	115.116	971.317	245.216	971.317	189.879	971.317	249.985	971.317	144.667
	640.457	4469.77	972.268	65.2329	972.268	78.5227	972.268	0.05419	972.268	23.9098	972.268	159.085	972.268	161.153	972.268	109.777	972.268	92.1813	972.268	65.9666	972.268	110.546	972.268	240.208	972.268	182.703	972.268	241.225	972.268	139.324
	640.939	4402.86	973.219	61.5192	973.219	74.2572	973.219	-1.75352	973.219	17.9347	973.219	152.853	973.219	154.899	973.219	102.63	973.219	85.9378	973.219	62.641	973.219	105.901	973.219	234.791	973.219	175.459	973.219	232.614	973.219	134.01
	641.421	4331.08	974.171	57.9945	974.171	70.1709	974.171	-3.53347	974.171	11.9543	974.171	146.648	974.171	148.631	974.171	95.8621	974.171	80.1591	974.171	59.2554	974.171	101.178	974.171	228.96	974.171	168.131	974.171	224.183	974.171	128.748
	641.903	4255.73	975.122	54.6249	975.122	65.9417	975.122	-5.25584	975.122	5.97366	975.122	140.429	975.122	142.343	975.122	89.4373	975.122	74.8629	975.122	55.8246	975.122	96.391	975.122	222.741	975.122	160.734	975.122	215.949	975.122	123.56
	642.385	4177.95	976.073	51.3912	976.073	61.6581	976.073	-6.90107	976.073	0	976.073	134.182	976.073	136.033	976.073	83.3604	976.073	70.4766	976.073	52.3655	976.073	91.5624	976.073	216.17	976.073	153.272	976.073	207.926	976.073	118.546
	642.867	4097.61	977.024	48.2693	977.024	57.3927	977.024	-8.45644	977.024	-0.79884	977.024	127.922	977.024	129.694	977.024	77.6032	977.024	66.8235	977.024	48.8953	977.024	86.7256	977.024	209.283	977.024	145.778	977.024	200.13	977.024	113.705
	643.35	4014.76	977.976	45.2361	977.976	53.1557	977.976	-9.91017	977.976	-1.58082	977.976	121.663	977.976	123.346	977.976	72.1389	977.976	63.3198	977.976	45.4318	977.976	81.9228	977.976	202.127	977.976	138.276	977.976	192.58	977.976	109.041
	643.832	3929.93	978.927	42.2736	978.927	48.9562	978.927	-11.2516	978.927	-2.34001	978.927	115.406	978.927	117.004	978.927	66.9513	978.927	59.4246	978.927	41.9945	978.927	77.1714	978.927	194.759	978.927	130.788	978.927	185.29	978.927	104.541
	644.314	3843.62	979.878	39.3562	979.878	44.8029	979.878	-12.4904	979.878	-3.07306	979.878	109.133	979.878	110.669	979.878	62.0272	979.878	55.8286	979.878	38.6078	979.878	72.4723	979.878	187.231	979.878	123.332	979.878	178.275	979.878	100.207
	644.796	3756.31	980.829	36.4875	980.829	40.7132	980.829	-13.6181	980.829	-3.7741	980.829	102.88	980.829	104.364	980.829	57.4942	980.829	52.1556	980.829	35.2848	980.829	67.8439	980.829	179.622	980.829	115.943	980.829	171.549	980.829	96.0019
	645.278	3669.72	981.781	33.6873	981.781	36.7039	981.781	-14.6329	981.781	-4.4356	981.781	96.6786	981.781	98.119	981.781	53.1699	981.781	48.5253	981.781	32.0622	981.781	63.3051	981.781	172.022	981.781	108.636	981.781	165.135	981.781	91.8921
	645.76	3583.83	982.732	30.9693	982.732	32.7993	982.732	-15.5221	982.732	-5.0449	982.732	90.5473	982.732	91.9744	982.732	49.0718	982.732	45.0449	982.732	28.9754	982.732	58.8739	982.732	164.524	982.732	101.455	982.732	159.09	982.732	87.8969
	646.242	3496.56	983.683	28.3367	983.683	29.022	983.683	-16.2736	983.683	-5.58868	983.683	84.5136	983.683	85.9484	983.683	45.187	983.683	41.6601	983.683	26.0456	983.683	54.5638	983.683	157.204	983.683	94.4338	983.683	153.44	983.683	84.0628
	646.724	3407.58	984.634	25.7953	984.634	25.3934	984.634	-16.8853	984.634	-6.05421	984.634	78.5957	984.634	80.0672	984.634	41.4764	984.634	38.2861	984.634	23.2888	984.634	50.3778	984.634	150.149	984.634	87.592	984.634	148.153	984.634	80.4384
	647.207	3318.6	985.585	23.3465	985.585	21.9346	985.585	-17.3509	985.585	-6.42789	985.585	72.8323	985.585	74.3447	985.585	37.9175	985.585	35.095	985.585	20.7141	985.585	46.3187	985.585	143.439	985.585	80.9493	985.585	143.212	985.585	77.0532
	647.689	3232.83	986.537	20.9815	986.537	18.6637	986.537	-17.6413	986.537	-6.69915	986.537	67.3161	986.537	68.7833	986.537	34.3234	986.537	31.8696	986.537	18.3258	986.537	42.3977	986.537	137.139	986.537	74.5078	986.537	138.512	986.537	73.891
	648.171	3150.68	987.488	18.6763	987.488	15.5999	987.488	-17.7471	987.488	-6.85793	987.488	61.9875	987.488	63.3913	987.488	30.6991	987.488	28.448	987.488	16.1193	987.488	38.6187	987.488	131.265	987.488	68.303	987.488	134.027	987.488	70.9173
	648.653	3071.26	988.439	16.4323	988.439	12.7559	988.439	-17.6736	988.439	-6.89536	988.439	56.8018	988.439	58.1778	988.439	27.127	988.439	25.1266	988.439	14.0867	988.439	34.9909	988.439	125.838	988.439	62.3386	988.439	129.74	988.439	68.1404
	649.135	2992.95	989.39	14.2624	989.39	10.1455	989.39	-17.4166	989.39	-6.80237	989.39	51.7846	989.39	53.163	989.39	23.5672	989.39	21.9653	989.39	12.2179	989.39	31.5219	989.39	120.871	989.39	56.6214	989.39	125.632	989.39	65.5437
	649.617	2915.62	990.341	12.1766	990.341	7.78307	990.341	-16.9753	990.341	-6.56837	990.341	46.9146	990.341	48.3679	990.341	19.9835	990.341	18.859	990.341	10.5016	990.341	28.21	990.341	116.363	990.341	51.1512	990.341	121.694	990.341	63.0902
	650.099	2840.12	991.293	10.1891	991.293	5.67724	991.293	-16.347	991.293	-6.1819	991.293	42.1715	991.293	43.8129	991.293	16.4914	991.293	15.6722	991.293	8.92569	991.293	25.0431	991.293	112.267	991.293	45.9088	991.293	117.919	991.293	60.7432
	650.581	2766.95	992.244	8.31707	992.244	3.82727	992.244	-15.5305	992.244	-5.63848	992.244	37.6459	992.244	39.4895	992.244	13.2236	992.244	12.9636	992.244	7.47986	992.244	22.0333	992.244	108.483	992.244	40.9049	992.244	114.298	992.244	58.4909
	651.063	2695.95	993.195	6.57545	993.195	2.22792	993.195	-14.5343	993.195	-4.93211	993.195	33.3766	993.195	35.435	993.195	10.1703	993.195	10.6909	993.195	6.1539	993.195	19.1746	993.195	105.073	993.195	36.1413	993.195	110.829	993.195	56.3621
	651.545	2626.89	994.146	4.97701	994.146	0.86937	994.146	-13.36	994.146	-4.05827	994.146	29.3781	994.146	31.6486	994.146	7.36097	994.146	8.47956	994.146	4.94912	994.146	16.4674	994.146	102.015	994.146	31.638	994.146	107.505	994.146	54.3381
	652.028	2559.77	995.098	3.5307	995.098	-0.25842	995.098	-11.9956	995.098	-3.0217	995.098	25.6647	995.098	28.1443	995.098	4.82598	995.098	6.38801	995.098	3.86033	995.098	13.9325	995.098	99.2058	995.098	27.3925	995.098	104.328	995.098	52.4141
	652.51	2494.79	996.049	2.24492	996.049	-1.16594	996.049	-10.4356	996.049	-1.80453	996.049	22.2486	996.049	24.9144	996.049	2.57678	996.049	4.61225	996.049	2.88452	996.049	11.606	996.049	96.6106	996.049	23.402	996.049	101.312	996.049	50.5862
	652.992	2432.33	997	1.1275	997	-1.86311	997	-8.68366	997	-0.38508	997	19.1441	997	21.9317	997	0.60045	997	3.25807	997	2.02056	997	9.50778	997	94.2291	997	19.6719	997	98.4747	997	48.8504
	653.474	2373.19	997.951	0.1837	997.951	-2.35756	997.951	-6.73513	997.951	1.20972	997.951	16.3574	997.951	19.1686	997.951	-0.99801	997.951	2.06615	997.951	1.26967	997.951	7.63922	997.951	92.0008	997.951	16.2031	997.951	95.82	997.951	47.2034
	653.956	2317.66	998.902	-0.57692	998.902	-2.65409	998.902	-4.59562	998.902	2.96576	998.902	13.8552	998.902	16.6329	998.902	-2.29566	998.902	0.98902	998.902	0.62071	998.902	5.9898	998.902	89.9337	998.902	13.0018	998.902	93.3516	998.902	45.5711
	654.438	2265.15	999.854	-1.15795	999.854	-2.75377	999.854	-2.26707	999.854	4.8645	999.854	11.674	999.854	14.3123	999.854	-3.25779	999.854	0.02019	999.854	0.06418	999.854	4.55343	999.854	88.0236	999.854	10.0684	999.854	91.0845	999.854	43.927
	654.92	2214.45	1000.8	-1.56567	1000.8	-2.66306	1000.8	-1.34208	1000.8	5.23566	1000.8	9.80358	1000.8	12.2078	1000.8	-3.91506	1000.8	-0.87783	1000.8	-0.39476	1000.8	3.31906	1000.8	86.2636	1000.8	7.40627	1000.8	89.0444	1000.8	42.2726
	655.403	2165.54
	655.885	2119.17
	656.367	2074.83
	656.849	2031.37
	657.331	1987.93
	657.813	1945.95
	658.295	1906.75
	658.777	1870.28
	659.259	1836.15
	659.741	1804.59
	660.224	1775.62
	660.706	1748.16
	661.188	1720.81
	661.67	1694.04
	662.152	1669.41
	662.634	1648.74
	663.116	1630.75
	663.598	1614.73
	664.081	1600.53
	664.563	1586.87
	665.045	1574.85
	665.527	1565.61
	666.009	1560.95
	666.491	1557.63
	666.973	1555.72
	667.455	1555.37
	667.938	1557.41
	668.42	1560.81
	668.902	1565.73
	669.384	1573.18
	669.866	1583.47
	670.348	1596.26
	670.83	1610.81
	671.312	1626.89
	671.794	1644.64
	672.277	1664.3
	672.759	1684.62
	673.241	1704.55
	673.723	1724.99
	674.205	1747.56
	674.687	1773.42
	675.169	1801.57
	675.651	1830.81
	676.134	1860.95
	676.616	1893.26
	677.098	1928.59
	677.58	1967.15
	678.062	2008.97
	678.544	2053.67
	679.026	2100.41
	679.508	2148.74
	679.99	2198.18
	680.472	2248.45
	680.955	2300.12
	681.437	2353.96
	681.919	2409.36
	682.401	2465.86
	682.883	2523.69
	683.365	2583.35
	683.847	2644.94
	684.33	2707.99
	684.812	2771.11
	685.294	2833.48
	685.776	2895.33
	686.258	2956.45
	686.74	3015.57
	687.222	3070.06
	687.704	3119.39
	688.186	3162.65
	688.668	3198.97
	689.151	3229.74
	689.633	3254.35
	690.115	3272.16
	690.597	3281.15
	691.079	3284.21
	691.561	3280.43
	692.043	3268.92
	692.525	3247.97
	693.008	3219.04
	693.49	3183.16
	693.972	3140.47
	694.454	3089.84
	694.936	3030.72
	695.418	2964.39
	695.9	2892.82
	696.382	2816.66
	696.865	2733.76
	697.347	2643.6
	697.829	2548.39
	698.311	2451.17
	698.793	2352.83
	699.275	2252.8
	699.757	2152.11
	700.239	2052.49
	700.721	1955.21
	701.204	1859.97
	701.686	1766.31
	702.168	1673.97
	702.65	1583.29
	703.132	1494.94
	703.614	1409.33
	704.096	1326.32
	704.578	1245.93
	705.061	1169.07
	705.543	1096.39
	706.025	1028.62
	706.507	967.066
	706.989	911.678
	707.471	860.816
	707.953	812.437
	708.435	766.301
	708.917	722.733
	709.399	682.089
	709.882	644.093
	710.364	608.272
	710.846	574.446
	711.328	542.538
	711.81	512.116
	712.292	481.976
	712.774	451.405
	713.256	421.518
	713.739	393.821
	714.221	368.775
	714.703	345.745
	715.185	323.908
	715.667	302.393
	716.149	280.816
	716.631	259.581
	717.113	239.604
	717.596	220.725
	718.078	202.32
	718.56	183.826
	719.042	166.063
	719.524	150.259
	720.006	136.604
	720.488	123.326
	720.97	109.224
	721.452	95.9058
	721.935	85.2539
	722.417	77.3708
	722.899	71.0566
	723.381	65.8904
	723.863	61.5567
	724.345	57.9564
	724.827	54.4732
	725.309	50.9152
	725.792	47.7754
	726.274	45.2116
	726.756	43.6545
	727.238	42.6384
	727.72	41.1463
	728.202	38.4435
	728.684	35.3264
	729.166	32.6814
	729.648	30.7734
	730.131	29.8787
	730.613	29.9536
	731.095	29.7273
	731.577	28.2368
	732.059	25.8174
	732.541	24.2012
	733.023	23.6349
	733.505	23.3878
	733.987	22.9673
	734.47	22.2003
	734.952	20.8376
	735.434	18.5829
	735.916	15.8597
	736.398	13.4884
	736.88	12.0482
	737.362	12.2156
	737.844	13.6666
	738.327	14.896
	738.809	14.6967
	739.291	13.7768
	739.773	13.4486
	740.255	14.1638
	740.737	15.3723
	741.219	16.6355
	741.701	17.5186
	742.183	17.1121
	742.666	15.5523
	743.148	13.7836
	743.63	12.6053
	744.112	11.8889
	744.594	11.3328
	745.076	11.0877
	745.558	11.3223
	746.04	12.012
	746.523	13.3393
	747.005	15.5035
	747.487	17.9113
	747.969	19.4404
	748.451	19.6694
	748.933	19.2655
	749.415	18.6319
	749.897	18.0248
	750.38	17.96
	750.862	18.4954
	751.344	18.8535
	751.826	18.0694
	752.308	16.6947
	752.79	15.9978
	753.272	16.0434
	753.754	16.2468
	754.236	15.7875
	754.719	15.3496
	755.201	15.763
	755.683	17.3809
	756.165	19.7205
	756.647	22.3702
	757.129	25.1085
	757.611	28.0189
	758.093	30.7221
	758.576	32.1573
	759.058	32.0613
	759.54	31.3884
	760.022	30.8685
	760.504	30.897
	760.986	31.6806
	761.468	33.4499
	761.95	35.2014
	762.432	35.9505
	762.915	36.2251
	763.397	36.9685
	763.879	38.3747
	764.361	39.9247
	764.843	41.2195
	765.325	42.1988
	765.807	42.3927
	766.289	42.4261
	766.771	44.3948
	767.254	49.2488
	767.736	56.3045
	768.218	64.3931
	768.7	71.519
	769.182	75.6212
	769.664	79.7251
	770.146	83.3763
	770.628	86.1422
	771.111	88.1354
	771.593	89.8544
	772.075	91.6812
	772.557	93.4554
	773.039	95.1253
	773.521	96.8012
	774.003	98.538
	774.485	100.472
	774.967	102.442
	775.45	104.667
	775.932	107.066
	776.414	109.567
	776.896	112.46
	777.378	116.205
	777.86	121.547
	778.342	127.708
	778.824	134.411
	779.307	141.097
	779.789	147.515
	780.271	153.459
	780.753	158.955
	781.235	164.023
	781.717	168.515
	782.199	171.977
	782.681	174.581
	783.163	177.428
	783.646	181.478
	784.128	186.423
	784.61	191.935
	785.092	197.561
	785.574	202.411
	786.056	205.941
	786.538	208.832
	787.02	212.126
	787.503	216.017
	787.985	220.265
	788.467	224.886
	788.949	230.343
	789.431	237.156
	789.913	245.172
	790.395	254.269
	790.877	264.276
	791.359	274.664
	791.842	285.17
	792.324	295.267
	792.806	304.818
	793.288	313.381
	793.77	320.03
	794.252	324.056
	794.734	326.983
	795.216	330.604
	795.698	335.362
	796.181	340.549
	796.663	345.702
	797.145	351.534
	797.627	358.991
	798.109	367.785
	798.591	377.34
	799.073	387.298
	799.555	397.178
	800.038	406.282
	800.52	415.025
	801.002	424.788
	801.484	435.408
	801.966	445.438
	802.448	453.304
	802.93	460.273
	803.412	468.145
	803.894	477.233
	804.377	486.62
	804.859	495.493
	805.341	503.642
	805.823	510.798
	806.305	517.155
	806.787	522.851
	807.269	528.106
	807.751	533.235
	808.234	538.527
	808.716	543.438
	809.198	547.733
	809.68	551.295
	810.162	553.964
	810.644	555.774
	811.126	557.518
	811.608	560.179
	812.091	563.707
	812.573	567.708
	813.055	571.956
	813.537	575.902
	814.019	579.384
	814.501	581.121
	814.983	580.062
	815.465	576.852
	815.947	574.064
	816.429	573.327
	816.912	573.538
	817.394	573.152
	817.876	572.281
	818.358	572.701
	818.84	576.199
	819.322	582.754
	819.804	592.283
	820.286	603.636
	820.769	615.24
	821.251	626.653
	821.733	638.322
	822.215	650.581
	822.697	663.016
	823.179	675.876
	823.661	689.489
	824.143	704.165
	824.625	720.138
	825.108	737.246
	825.59	755.112
	826.072	773.806
	826.554	794.101
	827.036	816.478
	827.518	840.557
	828	865.739
	828.482	891.666
	828.965	918.23
	829.447	945.353
	829.929	972.928
	830.411	1001.14
	830.893	1030.88
	831.375	1063.09
	831.857	1097.54
	832.339	1132.54
	832.822	1166.72
	833.304	1201.2
	833.786	1237.67
	834.268	1276.2
	834.75	1315.96
	835.232	1356.94
	835.714	1399.23
	836.196	1442.79
	836.678	1486.21
	837.16	1528.57
	837.643	1570.55
	838.125	1614.36
	838.607	1660.29
	839.089	1708.05
	839.571	1758.43
	840.053	1812.33
	840.535	1869
	841.018	1926.07
	841.5	1983.66
	841.982	2042.6
	842.464	2103.42
	842.946	2165.89
	843.428	2229.08
	843.91	2291.21
	844.392	2350.18
	844.874	2408.22
	845.356	2468.57
	845.839	2531.79
	846.321	2595.95
	846.803	2659.2
	847.285	2721.88
	847.767	2784.68
	848.249	2847.85
	848.731	2911.15
	849.213	2974.38
	849.696	3037.53
	850.178	3100.63
	850.66	3163.55
	851.142	3226.01
	851.624	3287.04
	852.106	3344.9
	852.588	3398.97
	853.07	3450.89
	853.553	3501.97
	854.035	3552.12
	854.517	3600.93
	854.999	3648.53
	855.481	3693.89
	855.963	3735.64
	856.445	3773.77
	856.927	3809.63
	857.409	3843.53
	857.891	3874.3
	858.374	3900.53
	858.856	3923.21
	859.338	3944.11
	859.82	3963.38
	860.302	3979.72
	860.784	3991.83
	861.266	4001.32
	861.749	4010.34
	862.231	4018.61
	862.713	4022.55
	863.195	4021.55
	863.677	4018.39
	864.159	4015.68
	864.641	4011.89
	865.123	4004.27
	865.605	3992.7
	866.087	3978.58
	866.57	3963
	867.052	3945.76
	867.534	3926.6
	868.016	3906.41
	868.498	3887.7
	868.98	3872.02
	869.462	3857.63
	869.944	3842.24
	870.427	3824.76
	870.909	3805.48
	871.391	3785.63
	871.873	3766.16
	872.355	3747.28
	872.837	3728.38
	873.319	3709.28
	873.801	3690.41
	874.284	3672.61
	874.766	3655.43
	875.248	3637.6
	875.73	3618.34
	876.212	3598.51
	876.694	3580.49
	877.176	3565.06
	877.658	3550.72
	878.14	3535.7
	878.623	3519.67
	879.105	3502.88
	879.587	3484.96
	880.069	3465.54
	880.551	3444.95
	881.033	3422.87
	881.515	3399.27
	881.997	3375.23
	882.48	3352.57
	882.962	3331.62
	883.444	3311.81
	883.926	3291.36
	884.408	3268.05
	884.89	3241.25
	885.372	3212.77
	885.854	3183.64
	886.337	3153.72
	886.819	3123.32
	887.301	3094.25
	887.783	3065.72
	888.265	3035.72
	888.747	3004.03
	889.229	2973.83
	889.711	2946.37
	890.193	2920.38
	890.676	2894.15
	891.158	2868.35
	891.64	2844.21
	892.122	2821.66
	892.604	2798.9
	893.086	2775.02
	893.568	2752.05
	894.05	2731.47
	894.533	2712.47
	895.015	2693.3
	895.497	2675.8
	895.979	2661.29
	896.461	2649.99
	896.943	2641.4
	897.425	2636.03
	897.907	2634.48
	898.389	2636.65
	898.871	2641.72
	899.354	2650.01
	899.836	2662.57
	900.318	2679.75
	900.8	2701.14
	901.282	2725.56
	901.764	2752.36
	902.246	2781.55
	902.729	2813.81
	903.211	2849.56
	903.693	2889.02
	904.175	2932.93
	904.657	2981.73
	905.139	3034.55
	905.621	3091.53
	906.103	3153.28
	906.585	3219.95
	907.067	3289.78
	907.55	3361.46
	908.032	3434.1
	908.514	3508.42
	908.996	3586.85
	909.478	3671.61
	909.96	3762.08
	910.442	3856.01
	910.924	3950.62
	911.407	4045.23
	911.889	4141.22
	912.371	4240.09
	912.853	4342.65
	913.335	4448.47
	913.817	4554.63
	914.299	4659.68
	914.781	4763.7
	915.264	4867.77
	915.746	4971
	916.228	5072.33
	916.71	5171.92
	917.192	5270.93
	917.674	5368.12
	918.156	5460.77
	918.638	5547.74
	919.12	5631.07
	919.602	5713.14
	920.085	5793.42
	920.567	5870.11
	921.049	5941.03
	921.531	6005.15
	922.013	6062.48
	922.495	6112.87
	922.977	6156.44
	923.46	6194.15
	923.942	6225.83
	924.424	6249.73
	924.906	6263.54
	925.388	6268.43
	925.87	6267.39
	926.352	6261.89
	926.834	6251.83
	927.316	6236.48
	927.798	6214.82
	928.281	6186.04
	928.763	6150.28
	929.245	6109.46
	929.727	6065.34
	930.209	6017.51
	930.691	5964.73
	931.173	5906.8
	931.655	5844.98
	932.138	5781.03
	932.62	5715.87
	933.102	5649.73
	933.584	5582.04
	934.066	5512.18
	934.548	5439.86
	935.03	5366.14
	935.512	5293.87
	935.995	5224.87
	936.477	5158.74
	936.959	5094.47
	937.441	5031.51
	937.923	4968.84
	938.405	4906.62
	938.887	4845.59
	939.369	4786.27
	939.851	4728.3
	940.334	4671.67
	940.816	4616.31
	941.298	4561.92
	941.78	4508.68
	942.262	4457.95
	942.744	4410.71
	943.226	4366.69
	943.708	4322.95
	944.191	4277.29
	944.673	4229.47
	945.155	4180.59
	945.637	4132.3
	946.119	4085.11
	946.601	4038.89
	947.083	3993.64
	947.565	3948.78
	948.047	3903.26
	948.529	3857.5
	949.012	3813.38
	949.494	3772.81
	949.976	3733.86
	950.458	3694.49
	950.94	3654.25
	951.422	3613.78
	951.904	3573.89
	952.386	3535.58
	952.869	3499.44
	953.351	3465.08
	953.833	3430.41
	954.315	3394.24
	954.797	3357.31
	955.279	3320.76
	955.761	3284.2
	956.243	3247.46
	956.726	3210.47
	957.208	3173.19
	957.69	3135.79
	958.172	3098.91
	958.654	3062.57
	959.136	3026.28
	959.618	2989.89
	960.1	2953.78
	960.582	2917.35
	961.065	2879.51
	961.547	2839.57
	962.029	2797.84
	962.511	2754.51
	962.993	2709.78
	963.475	2664
	963.957	2617.72
	964.439	2571.58
	964.922	2525.65
	965.404	2479.48
	965.886	2431.97
	966.368	2383.06
	966.85	2333.05
	967.332	2281.98
	967.814	2229.53
	968.296	2176.78
	968.778	2125.26
	969.261	2074.92
	969.743	2024.93
	970.225	1974.78
	970.707	1924.85
	971.189	1875.12
	971.671	1825.44
	972.153	1776.75
	972.635	1729.79
	973.117	1683.51
	973.6	1636.59
	974.082	1589.35
	974.564	1543.74
	975.046	1500.08
	975.528	1458.23
	976.01	1417.97
	976.492	1378.5
	976.974	1338.57
	977.457	1297.87
	977.939	1256.88
	978.421	1217.19
	978.903	1177.69
	979.385	1136.89
	979.867	1094.67
	980.349	1052.82
	980.831	1012.17
	981.313	973.033
	981.796	935.521
	982.278	898.666
	982.76	860.543
	983.242	821.633
	983.724	784.032
	984.206	749.455
	984.688	715.36
	985.17	679.946
	985.653	643.727
	986.135	607.81
	986.617	572.786
	987.099	540.372
	987.581	511.311
	988.063	484.063
	988.545	455.297
	989.027	427.539
	989.51	400.582
	989.992	374.43
	990.474	349.08
	990.956	324.534
	991.438	300.79
	991.92	277.85
	992.402	255.712
	992.884	234.377
	993.366	213.846
	993.848	194.118
	994.331	175.193
	994.813	157.071
	995.295	139.751
	995.777	123.235
	996.259	107.522
	996.741	92.6119
	997.223	78.505
	997.705	65.2012
	998.188	52.6994
	998.67	41.0017
	999.152	30.1071
	999.634	20.0154
	1000.12	10.7269
	1000.6	2.24244
