# Supplementary material for: Vesuvianite: a new mineral species of (U–Th)/He geochronology
Source: Royal Society of Chemistry journal article supplement (doi:10.1039/d4ja00127c), 2024-01-01
Supplement: d4ja00127c4.xlsx [file d4ja00127c4.xlsx]

## Sheet: Table S3
	Supplementary Table 3: All raman spectra results of M6608
	M6608-1-1		M6608-1-2		M6608-1-3		M6608-1-4		M6608-1-5		M6608-2-1		M6608-2-2		M6608-2-3		M6608-2-4		M6608-2-5		M6608-3-1		M6608-3-2		M6608-3-3		M6608-3-4		M6608-3-5
	Raman shift(cm-1)	Intensity(a.u.)	Raman shift(cm-1)	Intensity(a.u.)	Raman shift(cm-1)	Intensity(a.u.)	Raman shift(cm-1)	Intensity(a.u.)	Raman shift(cm-1)	Intensity(a.u.)	Raman shift(cm-1)	Intensity(a.u.)	Raman shift(cm-1)	Intensity(a.u.)	Raman shift(cm-1)	Intensity(a.u.)	Raman shift(cm-1)	Intensity(a.u.)	Raman shift(cm-1)	Intensity(a.u.)	Raman shift(cm-1)	Intensity(a.u.)	Raman shift(cm-1)	Intensity(a.u.)	Raman shift(cm-1)	Intensity(a.u.)	Raman shift(cm-1)	Intensity(a.u.)	Raman shift(cm-1)	Intensity(a.u.)
	300.707	22.9262	300.707	22.0742	300.707	23.9611	300.707	19.0138	300.707	29.2969	300.707	0	300.707	3.92663	300.707	0	300.707	0	300.707	-0.60962	300.707	3.8743	300.707	-7.79201	300.707	4.7232	300.707	5.32448	300.707	0
	301.659	18.1899	301.659	16.9159	301.659	19.0571	301.659	13.3734	301.659	24.6827	301.659	7.56604	301.659	15.3797	301.659	15.2149	301.659	9.97586	301.659	12.1662	301.659	23.0444	301.659	5.24581	301.659	18.7274	301.659	25.9474	301.659	26.693
	302.61	13.5724	302.61	12.2923	302.61	14.4776	302.61	8.84645	302.61	19.9714	302.61	14.8215	302.61	28.1947	302.61	29.9896	302.61	19.8824	302.61	25.6807	302.61	44.8761	302.61	19.1232	302.61	34.8644	302.61	47.0877	302.61	54.4241
	303.561	8.99639	303.561	8.07177	303.561	10.401	303.561	4.44185	303.561	14.9975	303.561	22.3157	303.561	43.9504	303.561	43.9941	303.561	29.018	303.561	40.9134	303.561	70.884	303.561	31.28	303.561	59.8957	303.561	70.2499	303.561	81.1711
	304.512	5.12427	304.512	4.44992	304.512	6.87859	304.512	3.73254	304.512	9.87232	304.512	29.9555	304.512	58.8698	304.512	63.3341	304.512	39.833	304.512	58.2251	304.512	102.99	304.512	40.5567	304.512	84.1344	304.512	103.244	304.512	106.649
	305.463	2.13273	305.463	2.97153	305.463	3.89448	305.463	3.18246	305.463	5.78038	305.463	36.6289	305.463	74.1417	305.463	74.8653	305.463	47.4067	305.463	75.9677	305.463	136.112	305.463	48.6896	305.463	107.034	305.463	131.445	305.463	127.574
	306.415	0.13981	306.415	3.10274	306.415	1.48553	306.415	2.2294	306.415	2.88528	306.415	42.2651	306.415	87.7715	306.415	77.1957	306.415	51.7644	306.415	93.3569	306.415	168.376	306.415	55.1764	306.415	128.13	306.415	154.245	306.415	141.126
	307.366	-0.6601	307.366	2.56389	307.366	-0.24763	307.366	1.49421	307.366	0.90925	307.366	47.3365	307.366	93.9572	307.366	74.4695	307.366	55.8579	307.366	109.342	307.366	197.944	307.366	57.7257	307.366	146.561	307.366	178.638	307.366	142.025
	308.317	-0.38697	308.317	1.85041	308.317	-1.30648	308.317	1.16795	308.317	-0.07759	308.317	46.9171	308.317	89.2096	308.317	63.5311	308.317	54.3111	308.317	122.327	308.317	177.945	308.317	58.1979	308.317	150.101	308.317	182.641	308.317	139.524
	309.268	-0.07003	309.268	1.62795	309.268	-1.67918	309.268	1.25253	309.268	0.60835	309.268	44.9165	309.268	73.1017	309.268	54.144	309.268	50.9781	309.268	120.722	309.268	142.766	309.268	52.5496	309.268	127.642	309.268	180.374	309.268	128.326
	310.22	0.51157	310.22	1.52581	310.22	-1.35992	310.22	1.7825	310.22	2.04679	310.22	40.7894	310.22	51.2476	310.22	44.9699	310.22	45.9082	310.22	105.618	310.22	104.257	310.22	44.246	310.22	93.4776	310.22	162.553	310.22	109.399
	311.171	1.87099	311.171	0.85846	311.171	-0.35465	311.171	2.80197	311.171	2.69789	311.171	33.0557	311.171	32.4045	311.171	32.2466	311.171	38.5325	311.171	80.9622	311.171	74.5547	311.171	39.3391	311.171	71.6124	311.171	112.806	311.171	85.2955
	312.122	3.96921	312.122	2.2133	312.122	1.66722	312.122	4.35085	312.122	4.68627	312.122	20.2253	312.122	16.6169	312.122	24.1307	312.122	32.8727	312.122	49.2679	312.122	52.7905	312.122	33.8405	312.122	50.1342	312.122	86.0603	312.122	56.7402
	313.073	6.60874	313.073	4.16832	313.073	4.60131	313.073	6.39231	313.073	6.81349	313.073	12.853	313.073	9.25089	313.073	17.3815	313.073	27.3134	313.073	32.929	313.073	37.1312	313.073	28.5444	313.073	32.2275	313.073	64.9913	313.073	25.2861
	314.024	9.91803	314.024	6.58893	314.024	8.30906	314.024	8.7337	314.024	9.45681	314.024	8.66637	314.024	7.14178	314.024	11.4274	314.024	21.9751	314.024	25.3178	314.024	25.5334	314.024	24.0547	314.024	19.0556	314.024	44.1931	314.024	5.03209
	314.976	13.9805	314.976	9.39988	314.976	12.6229	314.976	11.1992	314.976	12.9803	314.976	5.24061	314.976	6.91004	314.976	5.99874	314.976	17.0362	314.976	19.2873	314.976	16.0955	314.976	20.867	314.976	11.4355	314.976	24.4627	314.976	7.84062
	315.927	18.2873	315.927	13.2373	315.927	17.2004	315.927	14.1347	315.927	17.1389	315.927	5.25377	315.927	7.10938	315.927	5.77584	315.927	13.0939	315.927	15.4831	315.927	11.3884	315.927	18.2572	315.927	8.12795	315.927	17.2806	315.927	11.2754
	316.878	22.7653	316.878	17.3745	316.878	21.9391	316.878	17.8182	316.878	21.5616	316.878	5.45805	316.878	8.87753	316.878	4.44519	316.878	9.10965	316.878	14.3921	316.878	5.17699	316.878	15.6915	316.878	6.77501	316.878	11.1638	316.878	15.4633
	317.829	27.4129	317.829	21.5836	317.829	26.8442	317.829	22.2566	317.829	26.0301	317.829	5.90669	317.829	10.533	317.829	3.11962	317.829	7.66719	317.829	14.8812	317.829	0.06726	317.829	13.7211	317.829	8.00206	317.829	8.12494	317.829	18.6742
	318.78	32.2096	318.78	25.7498	318.78	31.9388	318.78	27.2833	318.78	30.3929	318.78	6.58733	318.78	11.3601	318.78	2.42914	318.78	9.34062	318.78	16.2316	318.78	-2.44127	318.78	12.5852	318.78	11.7529	318.78	8.62899	318.78	20.3481
	319.732	37.0281	319.732	29.9902	319.732	37.3728	319.732	31.7567	319.732	34.4714	319.732	7.21387	319.732	13.1056	319.732	2.30051	319.732	7.91535	319.732	18.0732	319.732	-2.2701	319.732	11.7792	319.732	15.2841	319.732	8.03514	319.732	23.4601
	320.683	41.9763	320.683	34.2326	320.683	42.6223	320.683	35.7383	320.683	38.3276	320.683	8.05581	320.683	13.4652	320.683	2.36863	320.683	7.27214	320.683	19.4244	320.683	-2.0026	320.683	10.5726	320.683	18.5369	320.683	11.269	320.683	25.7073
	321.634	46.6832	321.634	38.3758	321.634	47.7275	321.634	39.7193	321.634	41.9663	321.634	8.91566	321.634	13.0477	321.634	2.46215	321.634	6.61262	321.634	19.8405	321.634	-0.17639	321.634	9.40154	321.634	21.5339	321.634	14.0108	321.634	27.0749
	322.585	50.9713	322.585	42.3917	322.585	52.3375	322.585	43.8348	322.585	45.3356	322.585	9.67585	322.585	12.0473	322.585	2.51952	322.585	5.74441	322.585	19.4838	322.585	3.3398	322.585	8.30346	322.585	23.8214	322.585	15.2335	322.585	27.8228
	323.537	54.6491	323.537	46.2986	323.537	55.2102	323.537	47.9971	323.537	48.254	323.537	10.1568	323.537	10.4466	323.537	2.52466	323.537	4.90505	323.537	19.4084	323.537	7.35572	323.537	6.92035	323.537	23.8283	323.537	16.2641	323.537	28.857
	324.488	57.8189	324.488	50.2421	324.488	58.8651	324.488	52.066	324.488	51.1456	324.488	10.3093	324.488	8.23142	324.488	2.70419	324.488	4.31189	324.488	17.688	324.488	13.3469	324.488	6.37668	324.488	23.7313	324.488	17.8117	324.488	30.1487
	325.439	60.5511	325.439	54.382	325.439	63.1609	325.439	56.2702	325.439	54.0349	325.439	9.92364	325.439	6.30243	325.439	2.93363	325.439	3.52649	325.439	15.3155	325.439	18.5319	325.439	5.82377	325.439	22.7717	325.439	16.8269	325.439	31.5937
	326.39	62.9054	326.39	58.178	326.39	67.9322	326.39	60.3736	326.39	56.7815	326.39	9.30585	326.39	4.87752	326.39	3.35306	326.39	2.86929	326.39	12.6904	326.39	22.8976	326.39	5.39763	326.39	20.994	326.39	14.1584	326.39	32.7933
	327.341	64.9764	327.341	60.5686	327.341	72.9074	327.341	63.8623	327.341	59.1155	327.341	9.0997	327.341	4.07744	327.341	4.26289	327.341	1.3182	327.341	10.2556	327.341	27.3036	327.341	5.61946	327.341	18.7302	327.341	12.38	327.341	33.0346
	328.293	66.6745	328.293	62.322	328.293	75.5018	328.293	67.5919	328.293	61.6133	328.293	7.85343	328.293	2.8892	328.293	3.3806	328.293	-0.09521	328.293	8.32955	328.293	30.3983	328.293	6.23068	328.293	16.4833	328.293	10.4756	328.293	33.7055
	329.244	67.9772	329.244	63.2438	329.244	77.3621	329.244	70.3723	329.244	63.8629	329.244	6.69499	329.244	1.36476	329.244	1.60324	329.244	-1.06151	329.244	6.89057	329.244	30.1027	329.244	6.92895	329.244	15.8012	329.244	9.17449	329.244	34.2942
	330.195	68.7303	330.195	63.4619	330.195	78.5413	330.195	72.5428	330.195	65.8302	330.195	5.7043	330.195	-0.20134	330.195	0.38096	330.195	-1.4518	330.195	5.54643	330.195	27.2407	330.195	7.12832	330.195	15.1177	330.195	7.86543	330.195	33.3096
	331.146	68.8068	331.146	63.1572	331.146	79.0264	331.146	74.5258	331.146	67.4929	331.146	4.87291	331.146	-1.4945	331.146	-0.29328	331.146	-1.17064	331.146	2.86313	331.146	22.8874	331.146	5.46994	331.146	12.6959	331.146	5.90805	331.146	29.2865
	332.098	68.899	332.098	62.5449	332.098	79.053	332.098	74.9897	332.098	68.1323	332.098	3.18206	332.098	-2.59107	332.098	-0.34846	332.098	-0.63109	332.098	1.17693	332.098	15.9472	332.098	3.94846	332.098	10.4087	332.098	5.59	332.098	24.3658
	333.049	68.8122	333.049	62.4781	333.049	78.4852	333.049	74.3367	333.049	68.1938	333.049	2.36966	333.049	-3.64791	333.049	0.0517	333.049	0.39154	333.049	1.21813	333.049	10.4333	333.049	2.82064	333.049	8.38739	333.049	4.23693	333.049	20.0045
	334	68.6352	334	62.5891	334	77.3405	334	73.0033	334	67.8189	334	1.78664	334	-3.43927	334	0.93965	334	1.71536	334	2.16738	334	6.33134	334	1.91751	334	6.27225	334	3.65307	334	15.5768
	334.951	68.4349	334.951	62.6488	334.951	75.6605	334.951	71.1382	334.951	67.1754	334.951	1.15638	334.951	-1.40481	334.951	2.34566	334.951	3.29998	334.951	3.61685	334.951	3.4887	334.951	1.23392	334.951	4.04418	334.951	4.71182	334.951	10.8579
	335.902	68.2843	335.902	62.6877	335.902	73.6279	335.902	67.7482	335.902	66.8182	335.902	1.89747	335.902	0.34161	335.902	4.38255	335.902	5.72181	335.902	6.43948	335.902	0.94257	335.902	1.54434	335.902	2.83713	335.902	5.51755	335.902	9.62584
	336.854	68.1548	336.854	62.7322	336.854	71.4054	336.854	65.5014	336.854	66.5623	336.854	2.54651	336.854	5.08071	336.854	7.11698	336.854	8.5231	336.854	10.5809	336.854	1.83684	336.854	2.77258	336.854	1.7367	336.854	8.04749	336.854	9.80828
	337.805	68.0469	337.805	62.857	337.805	69.223	337.805	64.1706	337.805	66.2564	337.805	3.595	337.805	12.1685	337.805	10.4236	337.805	11.9774	337.805	14.998	337.805	3.95748	337.805	4.80556	337.805	1.59887	337.805	11.4096	337.805	10.9356
	338.756	67.9613	338.756	63.0938	338.756	67.289	338.756	63.5589	338.756	65.9632	338.756	5.32884	338.756	20.7573	338.756	14.2814	338.756	16.1481	338.756	19.7917	338.756	7.98535	338.756	7.65703	338.756	3.1922	338.756	15.6346	338.756	14.3336
	339.707	67.9008	339.707	63.4656	339.707	66.0418	339.707	63.2621	339.707	66.0609	339.707	8.15184	339.707	29.7144	339.707	18.7603	339.707	20.9387	339.707	26.4691	339.707	18.3472	339.707	11.4982	339.707	8.12449	339.707	21.8245	339.707	24.9607
	340.659	67.8934	340.659	64.1659	340.659	65.2775	340.659	63.1894	340.659	66.5578	340.659	11.8757	340.659	37.6787	340.659	23.8922	340.659	26.5227	340.659	33.1601	340.659	33.6495	340.659	15.8205	340.659	13.4479	340.659	29.2237	340.659	33.0844
	341.61	67.949	341.61	66.2138	341.61	66.4907	341.61	63.3282	341.61	67.0858	341.61	16.16	341.61	45.8809	341.61	29.5206	341.61	31.8881	341.61	40.1071	341.61	48.2338	341.61	20.5448	341.61	21.7072	341.61	39.0307	341.61	41.2739
	342.561	68.0969	342.561	68.8332	342.561	68.6696	342.561	63.5964	342.561	67.6619	342.561	21.0138	342.561	54.0535	342.561	35.5385	342.561	37.3608	342.561	47.5815	342.561	62.1724	342.561	26.0694	342.561	31.4791	342.561	49.7562	342.561	49.7529
	343.512	68.383	343.512	70.3848	343.512	69.6273	343.512	63.8523	343.512	68.4151	343.512	26.5334	343.512	61.3952	343.512	41.7936	343.512	43.7812	343.512	55.9759	343.512	77.1555	343.512	33.0896	343.512	39.5621	343.512	58.4665	343.512	58.1985
	344.463	68.806	344.463	71.9784	344.463	70.7063	344.463	66.2691	344.463	69.2472	344.463	32.3276	344.463	65.1238	344.463	47.8792	344.463	49.2368	344.463	64.3584	344.463	89.9147	344.463	43.4202	344.463	48.9836	344.463	68.4369	344.463	68.5448
	345.415	69.4139	345.415	73.4496	345.415	72.2544	345.415	68.2163	345.415	70.0785	345.415	38.109	345.415	68.4891	345.415	53.7388	345.415	56.2865	345.415	73.4744	345.415	102.17	345.415	54.6921	345.415	59.5572	345.415	80.437	345.415	74.6317
	346.366	70.2264	346.366	74.8557	346.366	74.5611	346.366	70.1857	346.366	70.927	346.366	43.7605	346.366	73.2797	346.366	60.1511	346.366	64.2202	346.366	82.4352	346.366	115.598	346.366	66.6576	346.366	71.3433	346.366	93.3451	346.366	82.4459
	347.317	71.2705	347.317	76.2691	347.317	77.796	347.317	72.6417	347.317	71.8319	347.317	49.1808	347.317	80.8159	347.317	67.8082	347.317	72.1877	347.317	90.5259	347.317	131.574	347.317	79.1594	347.317	84.3539	347.317	106.136	347.317	97.6072
	348.268	72.8669	348.268	77.8663	348.268	80.7292	348.268	73.7247	348.268	73.1494	348.268	54.2814	348.268	87.1273	348.268	76.1145	348.268	79.3164	348.268	100.601	348.268	147.891	348.268	92.5053	348.268	98.4283	348.268	120.763	348.268	115.429
	349.22	74.8336	349.22	79.4203	349.22	83.285	349.22	75.2646	349.22	74.3947	349.22	59.0253	349.22	96.1124	349.22	84.2497	349.22	86.2973	349.22	109.138	349.22	165.306	349.22	105.472	349.22	112.989	349.22	135.46	349.22	130.981
	350.171	77.0905	350.171	80.8166	350.171	85.5652	350.171	76.8816	350.171	75.6303	350.171	63.7548	350.171	105.794	350.171	91.6957	350.171	92.4274	350.171	117.749	350.171	185.078	350.171	117.479	350.171	127.025	350.171	150.78	350.171	146.076
	351.122	79.5915	351.122	81.975	351.122	87.6724	351.122	78.5569	351.122	76.9309	351.122	68.4202	351.122	115.074	351.122	98.9319	351.122	97.4904	351.122	126.917	351.122	206.41	351.122	127.245	351.122	139.834	351.122	165.722	351.122	160.887
	352.073	82.3241	352.073	82.778	352.073	89.8601	352.073	81.2402	352.073	78.5192	352.073	71.8169	352.073	123.59	352.073	109.894	352.073	102.23	352.073	134.777	352.073	221.724	352.073	129.513	352.073	150.43	352.073	173.47	352.073	171.341
	353.024	85.0297	353.024	83.9616	353.024	92.1454	353.024	82.9494	353.024	79.9527	353.024	74.4592	353.024	128.561	353.024	110.418	353.024	104.134	353.024	144.807	353.024	229.366	353.024	121.945	353.024	157.058	353.024	185.441	353.024	171.6
	353.976	87.8128	353.976	85.3934	353.976	94.7048	353.976	84.4144	353.976	81.4255	353.976	74.2965	353.976	125.642	353.976	107.729	353.976	104.784	353.976	145.876	353.976	217.073	353.976	112.872	353.976	156.836	353.976	188.259	353.976	160.623
	354.927	90.7143	354.927	87.1719	354.927	97.6207	354.927	86.0077	354.927	82.9136	354.927	70.8417	354.927	113.931	354.927	101.747	354.927	102.39	354.927	137.363	354.927	188.029	354.927	104.039	354.927	148.287	354.927	181.347	354.927	141.684
	355.878	93.7689	355.878	89.6122	355.878	100.983	355.878	88.1879	355.878	84.2415	355.878	64.1917	355.878	93.9679	355.878	87.9318	355.878	91.6943	355.878	124.602	355.878	157.542	355.878	94.6171	355.878	129.67	355.878	171.5	355.878	123.414
	356.829	97.2921	356.829	92.2716	356.829	104.881	356.829	90.1356	356.829	85.9109	356.829	58.8076	356.829	77.3832	356.829	77.046	356.829	82.4075	356.829	103.596	356.829	127.33	356.829	84.3674	356.829	112.619	356.829	147.738	356.829	103.515
	357.78	101.358	357.78	96.139	357.78	109.319	357.78	92.9729	357.78	88.1763	357.78	49.6343	357.78	60.9179	357.78	66.3855	357.78	71.1663	357.78	81.772	357.78	100.136	357.78	74.3165	357.78	96.0324	357.78	127.441	357.78	84.7626
	358.732	105.988	358.732	100.726	358.732	114.252	358.732	96.3787	358.732	91.0532	358.732	39.2248	358.732	45.7149	358.732	55.7574	358.732	58.8951	358.732	61.5508	358.732	76.0768	358.732	64.6177	358.732	79.7378	358.732	110.672	358.732	67.4294
	359.683	111.167	359.683	105.33	359.683	119.613	359.683	99.8379	359.683	94.5342	359.683	31.2808	359.683	33.4351	359.683	45.2256	359.683	47.1331	359.683	45.0377	359.683	54.9369	359.683	55.3747	359.683	63.6675	359.683	95.4501	359.683	51.544
	360.634	116.091	360.634	111.815	360.634	125.972	360.634	104.767	360.634	100.312	360.634	24.8936	360.634	21.9821	360.634	35.025	360.634	35.88	360.634	34.4631	360.634	41.3004	360.634	49.2352	360.634	49.8608	360.634	81.6477	360.634	40.6179
	361.585	123.496	361.585	119.016	361.585	133.963	361.585	109.853	361.585	106.052	361.585	19.0962	361.585	16.9867	361.585	26.5638	361.585	23.6323	361.585	24.2424	361.585	31.4853	361.585	43.4641	361.585	36.7254	361.585	68.9017	361.585	33.2802
	362.537	131.657	362.537	126.765	362.537	143.793	362.537	115.912	362.537	112.502	362.537	13.7661	362.537	13.7228	362.537	20.7951	362.537	13.6074	362.537	15.6146	362.537	23.4769	362.537	38.0853	362.537	26.0412	362.537	59.5923	362.537	27.5498
	363.488	139.838	363.488	135.104	363.488	155.124	363.488	123.271	363.488	120.047	363.488	8.81717	363.488	9.40399	363.488	17.6294	363.488	7.32904	363.488	9.29164	363.488	15.9847	363.488	33.1331	363.488	18.7107	363.488	54.7875	363.488	22.1689
	364.439	150.906	364.439	145.176	364.439	164.928	364.439	130.64	364.439	128.113	364.439	4.2865	364.439	6.41104	364.439	12.4959	364.439	1.11414	364.439	4.85966	364.439	9.48091	364.439	28.8072	364.439	13.3208	364.439	51.6467	364.439	17.649
	365.39	160.713	365.39	155.214	365.39	174.977	365.39	140.131	365.39	137.435	365.39	0.33287	365.39	4.16051	365.39	8.69004	365.39	1.92556	365.39	0.68455	365.39	5.21001	365.39	24.6798	365.39	8.92025	365.39	47.6528	365.39	14.0204
	366.341	170.758	366.341	166.037	366.341	185.337	366.341	150.659	366.341	146.859	366.341	-0.6013	366.341	2.55348	366.341	5.61571	366.341	2.76904	366.341	-2.74375	366.341	1.82446	366.341	21.1609	366.341	5.62517	366.341	43.6312	366.341	11.6117
	367.293	181.298	367.293	177.401	367.293	196.115	367.293	162.257	367.293	156.453	367.293	0.74909	367.293	1.59113	367.293	3.23223	367.293	2.21482	367.293	-5.10989	367.293	-1.8678	367.293	18.1801	367.293	3.2058	367.293	39.9915	367.293	10.1235
	368.244	191.717	368.244	187.874	368.244	207.56	368.244	176.004	368.244	167.449	368.244	0.05457	368.244	0.9092	368.244	1.95714	368.244	1.94121	368.244	-5.95165	368.244	-8.08335	368.244	15.1629	368.244	0.89215	368.244	37.1644	368.244	8.39407
	369.195	202.517	369.195	200.581	369.195	220.551	369.195	189.657	369.195	178.331	369.195	-0.63233	369.195	0.87274	369.195	1.10586	369.195	1.92129	369.195	-4.48652	369.195	-6.95226	369.195	12.9825	369.195	-0.35206	369.195	35.7177	369.195	5.76922
	370.146	213.383	370.146	214.23	370.146	233.819	370.146	202.976	370.146	189.01	370.146	-1.08296	370.146	1.20575	370.146	0.55893	370.146	2.37534	370.146	-4.1411	370.146	-4.45144	370.146	11.0385	370.146	-1.04755	370.146	35.1202	370.146	4.06573
	371.098	224.18	371.098	227.817	371.098	246.681	371.098	216.087	371.098	199.433	371.098	-1.17843	371.098	2.11186	371.098	0.32148	371.098	2.47141	371.098	-4.45354	371.098	-1.62721	371.098	9.49487	371.098	-1.05963	371.098	35.0151	371.098	2.9471
	372.049	234.778	372.049	240.191	372.049	258.444	372.049	229.19	372.049	209.548	372.049	-0.81167	372.049	3.90269	372.049	0.40282	372.049	1.10048	372.049	-4.21785	372.049	0.98591	372.049	8.64485	372.049	-0.41791	372.049	34.9881	372.049	1.1051
	373	245.729	373	249.988	373	268.772	373	239.252	373	217.671	373	0.69394	373	5.26705	373	0.84692	373	1.62273	373	-3.08689	373	3.45712	373	8.14397	373	0.64652	373	36.9016	373	0.1703
	373.951	254.442	373.951	256.003	373.951	277.521	373.951	247.847	373.951	223.695	373.951	2.30819	373.951	6.68035	373.951	1.8732	373.951	2.55108	373.951	-2.57233	373.951	3.58841	373.951	8.42822	373.951	1.19876	373.951	39.0645	373.951	-0.09088
	374.902	258.575	374.902	257.975	374.902	286.612	374.902	254.102	374.902	227.015	374.902	4.01102	374.902	8.50992	374.902	3.17041	374.902	3.74289	374.902	-1.43189	374.902	3.39576	374.902	9.44243	374.902	2.25796	374.902	42.0785	374.902	0.52126
	375.854	256.962	375.854	256.282	375.854	295.634	375.854	257.594	375.854	227.38	375.854	5.9008	375.854	10.9535	375.854	4.48493	375.854	5.03571	375.854	0.63366	375.854	4.27209	375.854	11.0916	375.854	4.16602	375.854	46.1564	375.854	2.09048
	376.805	252.07	376.805	254.131	376.805	291.437	376.805	259.156	376.805	225.44	376.805	8.11537	376.805	13.6656	376.805	5.44381	376.805	6.02275	376.805	1.50572	376.805	6.00383	376.805	13.1284	376.805	4.24881	376.805	49.9311	376.805	4.40769
	377.756	245.084	377.756	243.761	377.756	278.357	377.756	247.239	377.756	221.529	377.756	10.3643	377.756	15.4564	377.756	6.29895	377.756	7.04292	377.756	3.61107	377.756	7.35338	377.756	15.1452	377.756	4.02424	377.756	55.3533	377.756	7.39197
	378.707	236.633	378.707	231.407	378.707	263.58	378.707	233.143	378.707	215.588	378.707	13.0783	378.707	16.1785	378.707	6.88757	378.707	7.99087	378.707	6.57445	378.707	8.94226	378.707	17.4307	378.707	4.97712	378.707	60.2792	378.707	11.4799
	379.659	226.936	379.659	219.307	379.659	249.101	379.659	219.767	379.659	207.098	379.659	16.2667	379.659	16.7045	379.659	7.2167	379.659	9.20172	379.659	10.3544	379.659	11.1724	379.659	20.2719	379.659	7.42037	379.659	64.9155	379.659	16.6716
	380.61	216.054	380.61	208.178	380.61	234.095	380.61	205.134	380.61	194.647	380.61	19.5662	380.61	19.6346	380.61	7.45336	380.61	11.7168	380.61	15.168	380.61	14.6183	380.61	24.2189	380.61	10.8953	380.61	71.7811	380.61	22.5696
	381.561	203.359	381.561	197.934	381.561	218.828	381.561	190.231	381.561	184.374	381.561	23.7172	381.561	23.4756	381.561	9.92419	381.561	12.7305	381.561	20.6181	381.561	21.2757	381.561	26.1593	381.561	13.875	381.561	78.8011	381.561	30.1371
	382.512	191.335	382.512	187.878	382.512	203.883	382.512	175.063	382.512	173.765	382.512	29.1733	382.512	28.2342	382.512	15.1822	382.512	13.1412	382.512	27.2149	382.512	29.2955	382.512	30.9869	382.512	18.6131	382.512	86.4878	382.512	38.7302
	383.463	179.812	383.463	178.77	383.463	190.976	383.463	160.964	383.463	162.941	383.463	35.8183	383.463	35.5172	383.463	22.8031	383.463	14.1903	383.463	34.7926	383.463	38.2203	383.463	38.1639	383.463	25.843	383.463	95.0004	383.463	48.8856
	384.415	168.19	384.415	171.623	384.415	182.068	384.415	149.645	384.415	152.439	384.415	43.4075	384.415	47.2315	384.415	32.1374	384.415	17.6103	384.415	43.012	384.415	47.8049	384.415	46.1786	384.415	36.0608	384.415	104.467	384.415	61.292
	385.366	156.531	385.366	164.72	385.366	172.135	385.366	144.306	385.366	142.971	385.366	53.9688	385.366	60.4296	385.366	49.7394	385.366	44.6829	385.366	51.5209	385.366	66.8357	385.366	54.9972	385.366	49.011	385.366	117.506	385.366	74.5094
	386.317	149.64	386.317	156.55	386.317	163.097	386.317	140.883	386.317	135.224	386.317	64.6431	386.317	74.5818	386.317	68.0432	386.317	64.2989	386.317	66.3279	386.317	88.7656	386.317	62.9626	386.317	61.9083	386.317	130.801	386.317	92.8725
	387.268	143.985	387.268	148.922	387.268	154.916	387.268	139.962	387.268	128.433	387.268	75.7535	387.268	93.6524	387.268	83.915	387.268	78.5915	387.268	83.1343	387.268	110.503	387.268	70.628	387.268	78.2146	387.268	144.586	387.268	114.539
	388.22	137.579	388.22	142.887	388.22	147.587	388.22	139.904	388.22	122.652	388.22	87.4772	388.22	117.64	388.22	95.0481	388.22	89.2949	388.22	99.2314	388.22	130.212	388.22	78.2569	388.22	98.6672	388.22	158.718	388.22	137.532
	389.171	132.375	389.171	137.833	389.171	141.374	389.171	128.55	389.171	121.42	389.171	99.6915	389.171	131.463	389.171	99.2572	389.171	97.8196	389.171	115.288	389.171	148.822	389.171	85.2289	389.171	114.545	389.171	171.437	389.171	157.453
	390.122	128.048	390.122	133.321	390.122	136.18	390.122	123.333	390.122	118.119	390.122	116.121	390.122	142.565	390.122	108.708	390.122	106.645	390.122	130.074	390.122	164.52	390.122	90.3149	390.122	125.455	390.122	181.128	390.122	171.504
	391.073	124.336	391.073	129.407	391.073	131.828	391.073	119.735	391.073	114.736	391.073	127.748	391.073	150.894	391.073	117.62	391.073	113.918	391.073	143.378	391.073	175.304	391.073	93.7901	391.073	134.59	391.073	186.792	391.073	168.995
	392.024	121.265	392.024	126.276	392.024	128.299	392.024	116.388	392.024	111.859	392.024	134.052	392.024	156.276	392.024	124.183	392.024	119.593	392.024	154.714	392.024	178.238	392.024	94.4777	392.024	139.474	392.024	188.097	392.024	153.238
	392.976	119.05	392.976	124.317	392.976	125.649	392.976	112.953	392.976	109.596	392.976	139.645	392.976	158.381	392.976	127.849	392.976	124.769	392.976	163.103	392.976	167.812	392.976	89.4752	392.976	132.298	392.976	184.976	392.976	139.073
	393.927	118.043	393.927	123.004	393.927	124.118	393.927	110.424	393.927	107.814	393.927	134.592	393.927	158.347	393.927	131.389	393.927	124.184	393.927	169.06	393.927	151.664	393.927	76.5773	393.927	121.658	393.927	174.41	393.927	124.523
	394.878	117.248	394.878	122.262	394.878	123.338	394.878	108.484	394.878	106.318	394.878	131.242	394.878	155.259	394.878	129.444	394.878	122.303	394.878	160.851	394.878	134.982	394.878	64.2376	394.878	107.522	394.878	152.142	394.878	108.654
	395.829	117.219	395.829	121.697	395.829	123.345	395.829	106.885	395.829	105.431	395.829	127.876	395.829	150.98	395.829	125.826	395.829	119.187	395.829	147.635	395.829	118.207	395.829	53.1999	395.829	91.3839	395.829	125.773	395.829	92.9914
	396.78	118.532	396.78	121.059	396.78	124.167	396.78	105.462	396.78	105.451	396.78	121.769	396.78	147.535	396.78	124.832	396.78	114.582	396.78	139.961	396.78	101.43	396.78	43.4466	396.78	75.0063	396.78	103.783	396.78	79.1048
	397.732	120.006	397.732	123.698	397.732	125.848	397.732	106.093	397.732	105.751	397.732	115.142	397.732	143.044	397.732	120.745	397.732	108.162	397.732	129.341	397.732	85.4352	397.732	33.8499	397.732	59.6427	397.732	82.6234	397.732	64.5347
	398.683	122.536	398.683	126.269	398.683	128.423	398.683	108.061	398.683	107.068	398.683	107.36	398.683	137.606	398.683	112.786	398.683	99.6611	398.683	121.147	398.683	69.9575	398.683	24.9202	398.683	44.587	398.683	61.8915	398.683	54.6249
	399.634	125.499	399.634	129.51	399.634	131.736	399.634	111.265	399.634	108.539	399.634	98.7699	399.634	131.075	399.634	102.551	399.634	90.134	399.634	111.118	399.634	58.1889	399.634	16.979	399.634	32.3333	399.634	44.4615	399.634	46.3777
	400.585	128.678	400.585	133.531	400.585	135.774	400.585	116.028	400.585	110.23	400.585	89.7081	400.585	123.856	400.585	91.3682	400.585	80.1539	400.585	98.0491	400.585	50.9628	400.585	10.8506	400.585	23.7172	400.585	31.3713	400.585	38.5893
	401.537	132.48	401.537	137.284	401.537	140.847	401.537	124.006	401.537	114.233	401.537	80.8295	401.537	117.923	401.537	81.4386	401.537	69.8971	401.537	85.6551	401.537	45.3334	401.537	9.43618	401.537	17.2207	401.537	21.196	401.537	32.5081
	402.488	135.856	402.488	142.055	402.488	146.767	402.488	130.836	402.488	118.03	402.488	74.0086	402.488	107.573	402.488	70.5546	402.488	61.437	402.488	74.151	402.488	39.7832	402.488	7.94217	402.488	14.0277	402.488	12.9742	402.488	29.047
	403.439	139.979	403.439	146.762	403.439	153.176	403.439	137.609	403.439	122.954	403.439	67.5451	403.439	95.8063	403.439	60.1371	403.439	53.681	403.439	63.4745	403.439	37.3331	403.439	6.98622	403.439	12.058	403.439	6.57213	403.439	27.139
	404.39	145.09	404.39	151.651	404.39	159.903	404.39	144.573	404.39	128.657	404.39	61.1418	404.39	83.4181	404.39	50.4705	404.39	46.4167	404.39	53.7324	404.39	37.3418	404.39	6.83434	404.39	11.3158	404.39	2.08818	404.39	27.0452
	405.341	151.188	405.341	157.451	405.341	166.76	405.341	151.792	405.341	134.117	405.341	54.8208	405.341	70.8453	405.341	41.5618	405.341	39.6028	405.341	45.0819	405.341	37.705	405.341	7.70643	405.341	12.3932	405.341	-0.3557	405.341	29.4513
	406.293	157.099	406.293	163.527	406.293	173.842	406.293	158.337	406.293	141.533	406.293	50.4299	406.293	57.8913	406.293	34.1414	406.293	35.0232	406.293	37.7398	406.293	39.7442	406.293	13.6775	406.293	15.5155	406.293	-1.62826	406.293	34.8195
	407.244	163.044	407.244	169.518	407.244	180.821	407.244	163.598	407.244	150.096	407.244	45.7491	407.244	46.4139	407.244	27.9567	407.244	28.8115	407.244	32.1375	407.244	44.5795	407.244	20.0776	407.244	21.7921	407.244	0.58935	407.244	42.5163
	408.195	168.828	408.195	175.133	408.195	187.647	408.195	167.817	408.195	156.946	408.195	41.9823	408.195	37.9014	408.195	23.098	408.195	24.4471	408.195	27.9948	408.195	52.1786	408.195	27.4453	408.195	30.8308	408.195	5.18859	408.195	52.5102
	409.146	174.209	409.146	180.223	409.146	194.273	409.146	171.204	409.146	160.371	409.146	39.8186	409.146	33.2005	409.146	20.1453	409.146	24.2783	409.146	25.2626	409.146	62.5545	409.146	36.32	409.146	42.0191	409.146	11.5446	409.146	64.6791
	410.098	178.446	410.098	185.229	410.098	200.551	410.098	173.484	410.098	163.71	410.098	37.3652	410.098	31.1368	410.098	23.6142	410.098	25.7179	410.098	25.8468	410.098	77.1234	410.098	47.4573	410.098	53.9918	410.098	21.5035	410.098	78.9697
	411.049	181.977	411.049	188.332	411.049	205.875	411.049	174.467	411.049	166.038	411.049	36.5605	411.049	31.3588	411.049	24.0346	411.049	28.8435	411.049	25.5769	411.049	94.4719	411.049	59.2229	411.049	69.496	411.049	36.356	411.049	98.0534
	412	185.454	412	192.142	412	210.017	412	175.126	412	167.528	412	36.6645	412	34.2914	412	24.5851	412	32.5391	412	28.624	412	118.03	412	71.6379	412	87.929	412	54.7567	412	119.461
	412.951	188.417	412.951	196.246	412.951	212.572	412.951	175.651	412.951	168.284	412.951	37.7884	412.951	39.9915	412.951	26.2376	412.951	36.7603	412.951	35.6926	412.951	147.534	412.951	84.4579	412.951	109.57	412.951	77.086	412.951	142.85
	413.902	189.176	413.902	197.504	413.902	212.711	413.902	175.747	413.902	168.432	413.902	40.8042	413.902	48.2522	413.902	28.9011	413.902	42.2877	413.902	45.2064	413.902	179.537	413.902	97.0455	413.902	135.599	413.902	105.372	413.902	169.323
	414.854	189.026	414.854	197.858	414.854	211.917	414.854	174.774	414.854	166.573	414.854	44.1094	414.854	57.4547	414.854	33.7367	414.854	48.0889	414.854	57.1437	414.854	237.545	414.854	108.775	414.854	162.696	414.854	153.774	414.854	201.708
	415.805	187.54	415.805	194.975	415.805	208.16	415.805	172.287	415.805	163.886	415.805	49.1059	415.805	67.0861	415.805	39.1382	415.805	54.3402	415.805	70.3326	415.805	292.723	415.805	119.937	415.805	189.647	415.805	206.926	415.805	233.435
	416.756	184.67	416.756	189.021	416.756	202.049	416.756	168.926	416.756	160.165	416.756	54.6534	416.756	77.1078	416.756	44.8967	416.756	60.8077	416.756	85.3633	416.756	343.368	416.756	130.208	416.756	216.177	416.756	259.031	416.756	264.839
	417.707	180.348	417.707	180.604	417.707	194.385	417.707	165.337	417.707	155.148	417.707	59.4338	417.707	87.4266	417.707	50.9219	417.707	67.1872	417.707	102.795	417.707	388.699	417.707	138.985	417.707	241.81	417.707	302.364	417.707	296.426
	418.659	172.339	418.659	170.816	418.659	182.431	418.659	159.253	418.659	149.011	418.659	64.5359	418.659	96.6619	418.659	57.3244	418.659	73.0126	418.659	121.139	418.659	396.625	418.659	141.404	418.659	260.974	418.659	284.553	418.659	319.941
	419.61	164.11	419.61	159.693	419.61	170.497	419.61	152.482	419.61	140.28	419.61	69.7386	419.61	104.069	419.61	63.7907	419.61	78.1936	419.61	135.248	419.61	380.396	419.61	143.261	419.61	253.129	419.61	264.228	419.61	311.73
	420.561	153.285	420.561	148.096	420.561	158.457	420.561	144.923	420.561	130.384	420.561	74.7005	420.561	110.984	420.561	70.2067	420.561	82.4411	420.561	147.769	420.561	355.522	420.561	144.602	420.561	237.142	420.561	239.943	420.561	289.735
	421.512	139.69	421.512	136.426	421.512	146.248	421.512	136.34	421.512	119.519	421.512	79.2876	421.512	117.626	421.512	76.428	421.512	85.866	421.512	157.029	421.512	329.183	421.512	144.994	421.512	220.697	421.512	212.235	421.512	264.149
	422.463	126.572	422.463	124.674	422.463	133.857	422.463	126.003	422.463	105.918	422.463	83.573	422.463	122.503	422.463	82.1138	422.463	89.3193	422.463	152.274	422.463	301.05	422.463	142.738	422.463	199.639	422.463	185.347	422.463	241.357
	423.415	113.823	423.415	113.156	423.415	121.432	423.415	114.013	423.415	94.4776	423.415	87.2307	423.415	125.47	423.415	87.263	423.415	91.6451	423.415	153.948	423.415	271.828	423.415	139.09	423.415	184.54	423.415	164.364	423.415	219.833
	424.366	101.274	424.366	101.904	424.366	109.1	424.366	101.706	424.366	83.5076	424.366	90.2102	424.366	127.873	424.366	91.8449	424.366	91.1322	424.366	155.317	424.366	250.847	424.366	135.01	424.366	173.149	424.366	150.38	424.366	200.134
	425.317	88.9415	425.317	90.9136	425.317	96.9287	425.317	89.2542	425.317	72.9751	425.317	91.4064	425.317	129.698	425.317	95.7459	425.317	88.7673	425.317	156.534	425.317	236.317	425.317	130.763	425.317	164.043	425.317	142.003	425.317	184.877
	426.268	76.8743	426.268	80.1576	426.268	84.98	426.268	76.6324	426.268	63.16	426.268	89.4204	426.268	130.656	426.268	98.846	426.268	86.3717	426.268	159.153	426.268	223.477	426.268	126.517	426.268	155.599	426.268	136.74	426.268	177.241
	427.22	65.2958	427.22	69.7328	427.22	73.3368	427.22	64.6401	427.22	53.651	427.22	86.4509	427.22	129.455	427.22	100.827	427.22	83.9837	427.22	157.665	427.22	212.713	427.22	121.678	427.22	147.54	427.22	131.562	427.22	169.996
	428.171	54.5411	428.171	59.4644	428.171	62.1182	428.171	53.4674	428.171	44.7094	428.171	84.5003	428.171	128.106	428.171	101.965	428.171	80.1766	428.171	153.856	428.171	199.665	428.171	116.868	428.171	141.063	428.171	128.992	428.171	161.325
	429.122	46.748	429.122	49.4421	429.122	53.3027	429.122	43.0656	429.122	38.6876	429.122	82.5337	429.122	126.671	429.122	102.252	429.122	75.6493	429.122	147.636	429.122	186.861	429.122	111.858	429.122	135.026	429.122	127.721	429.122	151.779
	430.073	42.5236	430.073	40.3543	430.073	47.1964	430.073	33.9381	430.073	36.0454	430.073	79.8316	430.073	124.048	430.073	101.163	430.073	70.7342	430.073	139.038	430.073	175.391	430.073	106.785	430.073	128.791	430.073	126.173	430.073	142.309
	431.024	38.8095	431.024	35.4128	431.024	39.6389	431.024	28.8622	431.024	32.3254	431.024	75.9368	431.024	114.493	431.024	95.9913	431.024	64.8658	431.024	128.179	431.024	163.056	431.024	103.02	431.024	122.695	431.024	120.617	431.024	135.884
	431.976	33.7931	431.976	28.9424	431.976	32.9279	431.976	22.7359	431.976	28.0795	431.976	71.0194	431.976	103.578	431.976	88.8805	431.976	58.9855	431.976	113.739	431.976	146.392	431.976	100.202	431.976	116.071	431.976	114.695	431.976	126.152
	432.927	29.1495	432.927	23.3704	432.927	26.6777	432.927	18.0164	432.927	23.867	432.927	65.3901	432.927	89.6703	432.927	80.3336	432.927	52.8457	432.927	98.1018	432.927	130.094	432.927	96.5362	432.927	109.265	432.927	106.108	432.927	116.605
	433.878	24.9512	433.878	18.8995	433.878	21.0352	433.878	14.696	433.878	19.6671	433.878	59.0714	433.878	74.7625	433.878	70.3473	433.878	46.4131	433.878	81.8683	433.878	115.251	433.878	92.0538	433.878	102.47	433.878	95.2421	433.878	107.304
	434.829	20.7056	434.829	14.9604	434.829	16.3594	434.829	11.8246	434.829	15.2445	434.829	52.0218	434.829	62.858	434.829	58.8016	434.829	39.733	434.829	65.236	434.829	101.979	434.829	87.4789	434.829	95.8891	434.829	83.674	434.829	97.0987
	435.78	15.6745	435.78	11.5052	435.78	12.5102	435.78	9.44833	435.78	11.8681	435.78	44.4099	435.78	51.2461	435.78	47.2806	435.78	33.2671	435.78	49.7543	435.78	91.3011	435.78	82.5389	435.78	87.4562	435.78	73.2087	435.78	88.6095
	436.732	11.6222	436.732	8.42758	436.732	9.1799	436.732	7.3839	436.732	9.10789	436.732	36.7813	436.732	40.2916	436.732	37.7844	436.732	27.2143	436.732	36.2968	436.732	80.5021	436.732	78.7866	436.732	80.7319	436.732	63.5802	436.732	81.19
	437.683	8.12507	437.683	5.84804	437.683	6.38831	437.683	5.56745	437.683	7.0515	437.683	29.5449	437.683	29.9444	437.683	29.5372	437.683	21.9132	437.683	25.6419	437.683	69.464	437.683	75.3668	437.683	75.316	437.683	54.1932	437.683	74.6405
	438.634	4.66736	438.634	3.82717	438.634	4.13089	438.634	3.9091	438.634	5.63106	438.634	23.1172	438.634	21.2596	438.634	22.0368	438.634	17.4953	438.634	18.2169	438.634	59.167	438.634	71.6437	438.634	70.9398	438.634	45.3715	438.634	68.8838
	439.585	2.64475	439.585	2.30674	439.585	2.39287	439.585	2.17696	439.585	4.14657	439.585	18.4028	439.585	21.371	439.585	16.1165	439.585	13.433	439.585	13.8955	439.585	56.1452	439.585	67.7081	439.585	68.323	439.585	41.9655	439.585	64.5129
	440.537	2.50283	440.537	1.25984	440.537	1.06311	440.537	1.43081	440.537	2.88256	440.537	13.7827	440.537	19.4463	440.537	11.0876	440.537	9.9667	440.537	12.6622	440.537	53.91	440.537	63.4835	440.537	65.7982	440.537	38.3131	440.537	61.0949
	441.488	2.74496	441.488	0.57461	441.488	0.08583	441.488	1.07528	441.488	2.00384	441.488	10.1958	441.488	17.6134	441.488	9.764	441.488	7.19016	441.488	13.913	441.488	52.5279	441.488	59.1769	441.488	62.4815	441.488	37.7822	441.488	60.3796
	442.439	3.16783	442.439	0.189	442.439	-0.59639	442.439	0.98356	442.439	1.53445	442.439	7.63807	442.439	16.0642	442.439	10.3481	442.439	4.99092	442.439	17.2042	442.439	52.5581	442.439	54.7818	442.439	58.4616	442.439	39.4361	442.439	61.4149
	443.39	4.11844	443.39	0.02802	443.39	-1.07737	443.39	1.19752	443.39	1.20925	443.39	5.5992	443.39	14.0979	443.39	7.85409	443.39	3.08388	443.39	21.9058	443.39	55.0156	443.39	50.1853	443.39	54.3783	443.39	39.6858	443.39	61.4057
	444.341	4.49387	444.341	0.46722	444.341	-1.36162	444.341	1.85377	444.341	1.27948	444.341	4.07666	444.341	13.2685	444.341	6.46422	444.341	1.83202	444.341	26.3964	444.341	57.5149	444.341	45.6556	444.341	50.1013	444.341	42.1047	444.341	57.8411
	445.293	4.95285	445.293	0.75785	445.293	-1.29911	445.293	2.67318	445.293	1.41774	445.293	3.09879	445.293	12.0373	445.293	5.17865	445.293	0.83243	445.293	29.7065	445.293	57.5536	445.293	40.9039	445.293	45.8092	445.293	42.571	445.293	54.1673
	446.244	5.52487	446.244	1.09253	446.244	-0.96396	446.244	3.23656	446.244	1.67538	446.244	2.12892	446.244	9.83985	446.244	4.30949	446.244	0	446.244	30.0127	446.244	55.5589	446.244	36.0371	446.244	41.2813	446.244	42.2256	446.244	49.007
	447.195	6.20027	447.195	1.59214	447.195	-0.64759	447.195	3.73974	447.195	2.09093	447.195	0.89469	447.195	6.64676	447.195	3.46188	447.195	-0.16417	447.195	26.3019	447.195	51.4444	447.195	31.2024	447.195	36.3936	447.195	41.9092	447.195	41.6367
	448.146	6.90459	448.146	2.31402	448.146	-0.15545	448.146	4.58883	448.146	2.61483	448.146	0.54512	448.146	4.91399	448.146	2.93774	448.146	-0.47408	448.146	20.5409	448.146	40.8388	448.146	26.7626	448.146	31.4795	448.146	40.0296	448.146	34.9634
	449.098	7.03827	449.098	3.21885	449.098	0.69943	449.098	4.98893	449.098	3.53212	449.098	0.0497	449.098	5.53254	449.098	2.80973	449.098	-0.46705	449.098	14.9484	449.098	32.2784	449.098	22.1234	449.098	26.4907	449.098	37.4415	449.098	29.6839
	450.049	7.29775	450.049	4.24514	450.049	1.80131	450.049	5.33268	450.049	4.87908	450.049	0	450.049	6.85492	450.049	3.18963	450.049	-0.31816	450.049	10.3655	450.049	24.1246	450.049	17.9142	450.049	21.8367	450.049	34.1776	450.049	24.9837
	451	7.87537	451	5.34791	451	3.09839	451	5.77642	451	6.78894	451	0.94536	451	8.82811	451	4.11991	451	-0.10108	451	7.14193	451	16.6451	451	14.2252	451	17.6134	451	29.5519	451	20.6349
	451.951	8.7524	451.951	6.46645	451.951	4.54262	451.951	6.41235	451.951	9.49487	451.951	2.49566	451.951	11.0286	451.951	5.60184	451.951	0.13066	451.951	5.45986	451.951	11.3249	451.951	10.8567	451.951	13.7639	451.951	22.1735	451.951	16.6239
	452.902	9.95211	452.902	7.72679	452.902	6.05318	452.902	7.11652	452.902	11.0472	452.902	4.03019	452.902	12.8019	452.902	7.55866	452.902	0.40684	452.902	5.56218	452.902	6.61778	452.902	8.73407	452.902	10.4944	452.902	17.0478	452.902	13.1666
	453.854	11.2313	453.854	9.07559	453.854	7.45844	453.854	7.73265	453.854	12.41	453.854	5.79043	453.854	14.2386	453.854	9.70202	453.854	0.48891	453.854	5.77711	453.854	4.02511	453.854	6.6984	453.854	7.9589	453.854	13.0348	453.854	9.97544
	454.805	12.5589	454.805	10.4771	454.805	8.77809	454.805	8.35416	454.805	13.5787	454.805	7.52444	454.805	15.446	454.805	11.8414	454.805	0.52214	454.805	5.97535	454.805	3.14174	454.805	5.16268	454.805	5.72127	454.805	9.54896	454.805	7.12752
	455.756	13.8699	455.756	11.8996	455.756	10.0359	455.756	9.05003	455.756	14.5456	455.756	9.10814	455.756	16.547	455.756	13.8204	455.756	0.60339	455.756	6.11872	455.756	3.16031	455.756	4.44475	455.756	3.52845	455.756	6.3108	455.756	4.83935
	456.707	14.8154	456.707	13.3263	456.707	11.2177	456.707	9.72518	456.707	15.4744	456.707	11.2148	456.707	17.7602	456.707	15.5566	456.707	0.49032	456.707	6.27265	456.707	1.41107	456.707	4.24711	456.707	2.2934	456.707	4.68593	456.707	4.30021
	457.659	15.5171	457.659	14.7617	457.659	12.3786	457.659	10.596	457.659	16.1891	457.659	12.6332	457.659	18.5459	457.659	16.9905	457.659	0.19772	457.659	6.56806	457.659	-0.32305	457.659	4.24114	457.659	1.624	457.659	3.59727	457.659	3.86457
	458.61	15.7585	458.61	16.2031	458.61	13.6246	458.61	11.5194	458.61	16.54	458.61	13.1282	458.61	18.2841	458.61	18.0656	458.61	-0.07523	458.61	6.24511	458.61	-1.60238	458.61	4.4856	458.61	0.84949	458.61	2.5092	458.61	3.2003
	459.561	15.7487	459.561	17.6092	459.561	14.9428	459.561	12.4962	459.561	16.5689	459.561	12.9276	459.561	16.4741	459.561	18.801	459.561	-0.18359	459.561	5.45891	459.561	-2.47316	459.561	4.94583	459.561	0.00156	459.561	1.77824	459.561	2.1017
	460.512	16.0461	460.512	18.8985	460.512	16.2431	460.512	13.6088	460.512	16.4586	460.512	12.6544	460.512	12.5135	460.512	19.2818	460.512	0.04593	460.512	4.97979	460.512	-3.43368	460.512	5.50929	460.512	-0.46572	460.512	2.50426	460.512	0.71597
	461.463	16.689	461.463	20.164	461.463	17.562	461.463	14.5657	461.463	16.7368	461.463	9.7175	461.463	12.348	461.463	19.3065	461.463	0.14986	461.463	3.15364	461.463	-3.10117	461.463	5.96454	461.463	-0.45079	461.463	3.90928	461.463	0.37584
	462.415	17.5236	462.415	21.3426	462.415	18.8029	462.415	15.591	462.415	17.0794	462.415	8.24089	462.415	11.977	462.415	19.2093	462.415	0.27426	462.415	2.02375	462.415	-1.82843	462.415	6.43592	462.415	0	462.415	4.79182	462.415	0.13024
	463.366	18.4236	463.366	22.3495	463.366	19.8922	463.366	16.6085	463.366	17.4104	463.366	7.51198	463.366	12.0487	463.366	19.3321	463.366	0.39788	463.366	1.2306	463.366	-0.7455	463.366	6.28243	463.366	0.22829	463.366	5.36764	463.366	0.34029
	464.317	19.3281	464.317	23.1021	464.317	20.7624	464.317	17.5437	464.317	17.6465	464.317	6.8477	464.317	12.9814	464.317	19.8619	464.317	0.53575	464.317	0.45938	464.317	-0.43428	464.317	6.14515	464.317	0.72311	464.317	5.8616	464.317	1.28359
	465.268	20.4886	465.268	23.4315	465.268	21.2819	465.268	18.3376	465.268	17.559	465.268	6.45408	465.268	13.4654	465.268	20.3638	465.268	0.9333	465.268	0	465.268	1.05942	465.268	5.95083	465.268	1.67155	465.268	6.32961	465.268	2.85271
	466.22	21.2151	466.22	23.3182	466.22	21.2903	466.22	18.7023	466.22	17.3579	466.22	5.97821	466.22	14.7884	466.22	20.8117	466.22	1.37666	466.22	0.14513	466.22	2.55297	466.22	5.84794	466.22	2.763	466.22	7.00676	466.22	4.63486
	467.171	21.7825	467.171	23.1438	467.171	20.9988	467.171	19.1341	467.171	16.9897	467.171	5.80596	467.171	16.1122	467.171	21.0385	467.171	2.11905	467.171	0.87648	467.171	4.71524	467.171	6.04546	467.171	4.10359	467.171	8.31991	467.171	6.92874
	468.122	22.2136	468.122	22.9312	468.122	20.4765	468.122	19.5661	468.122	16.5237	468.122	5.90362	468.122	17.465	468.122	21.0727	468.122	3.04031	468.122	1.87848	468.122	7.42351	468.122	6.62312	468.122	5.89684	468.122	10.0643	468.122	9.70981
	469.073	22.4276	469.073	22.5428	469.073	19.7625	469.073	19.6373	469.073	16.119	469.073	6.01033	469.073	19.2967	469.073	21.057	469.073	3.78776	469.073	2.22795	469.073	10.1027	469.073	7.60881	469.073	8.44527	469.073	11.6338	469.073	12.7643
	470.024	22.4033	470.024	22.0542	470.024	18.946	470.024	19.3165	470.024	15.5657	470.024	7.62202	470.024	20.9193	470.024	20.9101	470.024	4.67069	470.024	3.63054	470.024	13.8865	470.024	11.0313	470.024	11.4357	470.024	13.6653	470.024	16.2478
	470.976	22.1863	470.976	21.4933	470.976	17.9226	470.976	18.9358	470.976	14.8926	470.976	10.7094	470.976	21.4576	470.976	20.793	470.976	4.88094	470.976	4.54295	470.976	18.3515	470.976	13.8652	470.976	14.5948	470.976	16.5755	470.976	20.8104
	471.927	21.6943	471.927	20.8858	471.927	16.7428	471.927	18.3882	471.927	14.1642	471.927	14.0007	471.927	21.6194	471.927	20.6356	471.927	4.93379	471.927	5.30349	471.927	23.7671	471.927	16.9677	471.927	17.8937	471.927	19.9192	471.927	26.2185
	472.878	20.8714	472.878	20.2192	472.878	15.4642	472.878	17.6345	472.878	13.4803	472.878	16.7143	472.878	21.917	472.878	20.4443	472.878	5.14715	472.878	6.2397	472.878	30.2489	472.878	20.8376	472.878	21.4216	472.878	23.5163	472.878	32.2898
	473.829	19.6695	473.829	19.3138	473.829	14.1597	473.829	16.8645	473.829	13.128	473.829	19.5664	473.829	22.2426	473.829	20.5329	473.829	5.1559	473.829	7.6739	473.829	37.578	473.829	24.7005	473.829	25.7925	473.829	28.2541	473.829	39.1905
	474.78	18.5164	474.78	18.2635	474.78	12.8143	474.78	15.7815	474.78	12.8352	474.78	23.5895	474.78	20.4405	474.78	21.4702	474.78	5.51416	474.78	9.8122	474.78	45.7663	474.78	29.45	474.78	30.9066	474.78	33.2436	474.78	48.0148
	475.732	17.0944	475.732	17.1817	475.732	11.4872	475.732	14.7645	475.732	12.4801	475.732	28.0117	475.732	20.0722	475.732	23.1713	475.732	6.86131	475.732	12.3712	475.732	55.6022	475.732	34.8845	475.732	35.2802	475.732	38.6537	475.732	58.5008
	476.683	15.6434	476.683	16.1266	476.683	10.2224	476.683	13.8592	476.683	12.0743	476.683	32.8498	476.683	21.5254	476.683	25.7918	476.683	9.18699	476.683	15.4828	476.683	67.5695	476.683	40.6807	476.683	40.0737	476.683	44.9664	476.683	70.6907
	477.634	14.6436	477.634	15.1503	477.634	9.06617	477.634	13.0048	477.634	11.6805	477.634	38.3655	477.634	24.1126	477.634	29.5464	477.634	12.2084	477.634	19.4171	477.634	82.0176	477.634	46.3838	477.634	47.5748	477.634	52.8196	477.634	84.6313
	478.585	13.9324	478.585	14.3817	478.585	8.43527	478.585	12.4223	478.585	11.4885	478.585	45.5971	478.585	30.8043	478.585	35.0561	478.585	17.8922	478.585	25.3728	478.585	98.4782	478.585	52.7722	478.585	60.6748	478.585	62.9072	478.585	101.286
	479.537	13.5364	479.537	13.5863	479.537	8.20381	479.537	11.8568	479.537	11.3485	479.537	55.6457	479.537	40.4968	479.537	40.7584	479.537	24.5516	479.537	35.0307	479.537	116.779	479.537	60.6424	479.537	74.8434	479.537	76.4473	479.537	118.227
	480.488	13.4893	480.488	12.8138	480.488	8.25473	480.488	11.467	480.488	11.4733	480.488	67.2295	480.488	52.8225	480.488	47.0506	480.488	33.9112	480.488	46.6308	480.488	137.936	480.488	68.9432	480.488	92.7204	480.488	92.6152	480.488	135.616
	481.439	13.7932	481.439	12.105	481.439	8.50994	481.439	11.3468	481.439	11.9598	481.439	79.4432	481.439	67.2138	481.439	54.4979	481.439	45.8305	481.439	59.035	481.439	162.381	481.439	77.0887	481.439	113.848	481.439	110.029	481.439	153.021
	482.39	14.425	482.39	11.509	482.39	8.97493	482.39	11.5201	482.39	12.7251	482.39	91.915	482.39	82.6105	482.39	64.5445	482.39	55.8973	482.39	72.139	482.39	189.823	482.39	85.2991	482.39	130.408	482.39	125.388	482.39	168.318
	483.341	15.3248	483.341	11.072	483.341	9.63879	483.341	11.7377	483.341	13.3724	483.341	104.787	483.341	102.865	483.341	71.9581	483.341	65.3538	483.341	86.3511	483.341	213.885	483.341	92.8506	483.341	141.336	483.341	156.763	483.341	180.777
	484.293	16.3729	484.293	10.621	484.293	10.3977	484.293	11.9986	484.293	14.0827	484.293	114.259	484.293	110.265	484.293	73.3982	484.293	71.3598	484.293	101.559	484.293	234.261	484.293	99.5738	484.293	151.398	484.293	172.015	484.293	190.533
	485.244	17.5	485.244	10.2132	485.244	11.2209	485.244	12.2214	485.244	14.8145	485.244	117.103	485.244	104.567	485.244	70.3242	485.244	73.6563	485.244	111.09	485.244	243.294	485.244	105.674	485.244	155.825	485.244	173.491	485.244	191.519
	486.195	18.6337	486.195	9.95651	486.195	12.0902	486.195	12.3282	486.195	15.4675	486.195	110.568	486.195	90.2308	486.195	65.405	486.195	72.6426	486.195	107.08	486.195	232.184	486.195	111.173	486.195	148.421	486.195	171.28	486.195	177.234
	487.146	19.6998	487.146	9.93418	487.146	13.0829	487.146	12.8086	487.146	15.8097	487.146	98.8206	487.146	78.4827	487.146	56.485	487.146	67.2243	487.146	94.2243	487.146	204.254	487.146	109.35	487.146	138.685	487.146	165.255	487.146	162.268
	488.098	20.857	488.098	10.2758	488.098	14.2543	488.098	13.9679	488.098	16.3979	488.098	87.492	488.098	66.3287	488.098	44.4261	488.098	60.7055	488.098	80.7801	488.098	172.554	488.098	105.293	488.098	127.127	488.098	138.649	488.098	145.564
	489.049	22.0702	489.049	11.0659	489.049	15.6234	489.049	15.3368	489.049	17.0683	489.049	76.4503	489.049	54.1896	489.049	33.4889	489.049	53.0547	489.049	67.2694	489.049	138.057	489.049	97.5339	489.049	113.823	489.049	110.155	489.049	127.651
	490	23.3317	490	12.2959	490	17.2375	490	16.7668	490	17.8015	490	65.5207	490	42.3333	490	25.6522	490	44.6708	490	53.868	490	103.948	490	87.2819	490	99.2822	490	87.2385	490	109.388
	490.951	24.6676	490.951	13.8427	490.951	19.2163	490.951	18.4494	490.951	18.7592	490.951	54.3745	490.951	30.9882	490.951	21.1059	490.951	36.727	490.951	40.3982	490.951	78.1612	490.951	79.8932	490.951	84.8414	490.951	66.9681	490.951	92.5498
	491.902	25.6778	491.902	15.7753	491.902	21.436	491.902	20.5118	491.902	19.8065	491.902	45.4861	491.902	23.9344	491.902	16.1158	491.902	29.0898	491.902	31.3497	491.902	64.4341	491.902	72.2825	491.902	70.6559	491.902	56.4805	491.902	75.2611
	492.854	27.0742	492.854	17.9111	492.854	23.7849	492.854	22.7821	492.854	20.9842	492.854	38.0162	492.854	18.432	492.854	10.7175	492.854	21.1568	492.854	23.021	492.854	51.937	492.854	65.0807	492.854	58.7758	492.854	45.185	492.854	61.889
	493.805	28.7491	493.805	20.1302	493.805	26.2216	493.805	25.2996	493.805	22.2251	493.805	32.0436	493.805	13.9234	493.805	5.76915	493.805	14.8709	493.805	15.5542	493.805	41.47	493.805	58.6482	493.805	49.2934	493.805	34.3873	493.805	50.6784
	494.756	30.5161	494.756	22.3373	494.756	28.705	494.756	28.0404	494.756	23.4676	494.756	27.5546	494.756	10.0917	494.756	2.01798	494.756	11.8783	494.756	9.5487	494.756	34.4419	494.756	53.2489	494.756	42.205	494.756	26.0419	494.756	39.8557
	495.707	32.3039	495.707	24.616	495.707	31.173	495.707	30.3935	495.707	24.805	495.707	23.7109	495.707	7.25246	495.707	-1.06433	495.707	10.2947	495.707	6.74948	495.707	29.016	495.707	48.9558	495.707	39.3805	495.707	18.3549	495.707	33.1696
	496.659	34.0209	496.659	26.8721	496.659	33.609	496.659	32.442	496.659	25.8198	496.659	21.938	496.659	5.50705	496.659	0.28509	496.659	9.84138	496.659	4.04331	496.659	26.3771	496.659	45.5978	496.659	35.6483	496.659	14.4617	496.659	29.2526
	497.61	35.7052	497.61	29.0463	497.61	35.8826	497.61	34.2113	497.61	26.8961	497.61	21.1146	497.61	4.9492	497.61	1.3078	497.61	9.75171	497.61	3.12273	497.61	23.9562	497.61	42.9734	497.61	32.8229	497.61	12.4014	497.61	26.1579
	498.561	37.3971	498.561	31.1829	498.561	38.0142	498.561	35.725	498.561	27.9477	498.561	21.0393	498.561	5.44994	498.561	1.66008	498.561	10.1615	498.561	4.23402	498.561	22.3437	498.561	40.8892	498.561	31.0691	498.561	12.2574	498.561	23.8528
	499.512	39.152	499.512	33.4061	499.512	40.1285	499.512	37.0253	499.512	28.5737	499.512	21.9606	499.512	6.65412	499.512	3.56691	499.512	11.7801	499.512	6.75378	499.512	24.2189	499.512	39.0633	499.512	29.5702	499.512	15.2968	499.512	23.4152
	500.463	40.9989	500.463	35.5526	500.463	42.169	500.463	39.0494	500.463	29.1366	500.463	24.1019	500.463	8.82711	500.463	6.09333	500.463	13.3005	500.463	10.7688	500.463	27.2704	500.463	37.5387	500.463	29.524	500.463	18.3471	500.463	24.7861
	501.415	42.8732	501.415	37.5471	501.415	44.1367	501.415	40.8586	501.415	28.7905	501.415	27.4986	501.415	11.4525	501.415	8.84579	501.415	15.0421	501.415	15.1223	501.415	31.1619	501.415	36.1192	501.415	29.9976	501.415	23.1558	501.415	27.2933
	502.366	44.7444	502.366	39.2767	502.366	45.9933	502.366	42.4117	502.366	28.8229	502.366	30.4724	502.366	14.3571	502.366	11.8219	502.366	16.882	502.366	19.8189	502.366	35.7262	502.366	34.9404	502.366	30.8689	502.366	28.4022	502.366	30.4434
	503.317	46.5234	503.317	40.6314	503.317	47.6955	503.317	43.5931	503.317	29.8884	503.317	32.0934	503.317	17.4362	503.317	14.9932	503.317	18.697	503.317	24.839	503.317	40.7257	503.317	34.1044	503.317	32.1173	503.317	33.3121	503.317	34.037
	504.268	47.8724	504.268	41.3978	504.268	49.1414	504.268	43.8516	504.268	30.8425	504.268	33.404	504.268	20.7764	504.268	18.2401	504.268	20.3421	504.268	30.046	504.268	45.6649	504.268	33.6845	504.268	34.0567	504.268	38.7874	504.268	38.8368
	505.22	48.8297	505.22	41.7418	505.22	50.2172	505.22	44.178	505.22	31.7995	505.22	34.1018	505.22	24.0335	505.22	21.4256	505.22	22.1099	505.22	35.2611	505.22	50.0332	505.22	33.1755	505.22	35.8211	505.22	44.0699	505.22	43.5984
	506.171	49.4429	506.171	41.7349	506.171	50.7885	506.171	44.4821	506.171	32.561	506.171	34.3884	506.171	27.1429	506.171	24.3927	506.171	23.7379	506.171	40.3356	506.171	54.3242	506.171	32.5304	506.171	38.1097	506.171	48.8824	506.171	48.7419
	507.122	49.7479	507.122	41.4177	507.122	50.9132	507.122	44.5948	507.122	33.2413	507.122	33.3223	507.122	30.1251	507.122	26.9696	507.122	25.3431	507.122	43.855	507.122	58.2979	507.122	31.8802	507.122	40.3094	507.122	51.7544	507.122	52.8931
	508.073	49.7965	508.073	40.8435	508.073	50.7228	508.073	44.3323	508.073	34.0529	508.073	29.8253	508.073	33.0453	508.073	28.8101	508.073	27.0998	508.073	44.2784	508.073	61.5921	508.073	31.3961	508.073	41.525	508.073	51.2317	508.073	54.2878
	509.024	49.5186	509.024	39.9523	509.024	50.1153	509.024	43.8307	509.024	35.209	509.024	26.8484	509.024	36.2317	509.024	25.7822	509.024	28.0205	509.024	46.1081	509.024	65.3839	509.024	30.7757	509.024	43.4496	509.024	54.2368	509.024	54.9557
	509.976	49.0988	509.976	38.9037	509.976	49.2853	509.976	43.6769	509.976	36.1097	509.976	24.4668	509.976	38.0182	509.976	25.3153	509.976	27.6669	509.976	46.632	509.976	67.5554	509.976	30.2918	509.976	45.6266	509.976	56.3166	509.976	53.9782
	510.927	48.3954	510.927	37.7142	510.927	48.293	510.927	43.4854	510.927	36.805	510.927	22.5202	510.927	37.4975	510.927	25.4066	510.927	27.0201	510.927	46.52	510.927	67.3823	510.927	29.5138	510.927	47.3307	510.927	57.8495	510.927	52.3463
	511.878	47.4231	511.878	36.3368	511.878	47.1641	511.878	43.1461	511.878	37.3243	511.878	20.8896	511.878	35.1574	511.878	25.1574	511.878	26.3597	511.878	45.9494	511.878	65.3779	511.878	28.1615	511.878	47.8463	511.878	59.0198	511.878	50.1183
	512.829	46.3843	512.829	34.6224	512.829	45.8927	512.829	42.8193	512.829	37.6829	512.829	19.4546	512.829	33.338	512.829	24.5445	512.829	25.2662	512.829	44.588	512.829	63.7335	512.829	25.9883	512.829	46.1056	512.829	59.8598	512.829	46.2617
	513.781	45.0479	513.781	33.3424	513.781	44.4718	513.781	41.2531	513.781	35.6266	513.781	18.6884	513.781	29.5664	513.781	20.9383	513.781	23.6093	513.781	45.6224	513.781	59.7098	513.781	24.7719	513.781	43.8208	513.781	57.5433	513.781	40.2754
	514.732	43.6118	514.732	32.2039	514.732	42.8064	514.732	39.34	514.732	33.669	514.732	17.6576	514.732	25.6062	514.732	18.7616	514.732	21.9212	514.732	44.3304	514.732	54.1294	514.732	23.3168	514.732	37.925	514.732	52.2109	514.732	35.2523
	515.683	42.124	515.683	31.1673	515.683	40.9383	515.683	37.1428	515.683	31.5306	515.683	16.3966	515.683	21.5578	515.683	17.1375	515.683	19.8521	515.683	41.0993	515.683	47.3236	515.683	21.7218	515.683	31.2566	515.683	45.2975	515.683	30.9912
	516.634	40.6115	516.634	30.2051	516.634	38.9239	516.634	34.7428	516.634	28.9149	516.634	14.8801	516.634	17.4616	516.634	15.0546	516.634	17.199	516.634	36.6366	516.634	39.8015	516.634	20.0837	516.634	26.2118	516.634	38.2758	516.634	27.1013
	517.585	39.041	517.585	29.275	517.585	36.7958	517.585	32.5966	517.585	26.3914	517.585	12.2654	517.585	13.7016	517.585	12.7271	517.585	14.7002	517.585	30.8952	517.585	33.0163	517.585	17.9485	517.585	21.0776	517.585	32.3407	517.585	23.624
	518.537	37.4552	518.537	27.9823	518.537	34.5099	518.537	30.5431	518.537	24.0886	518.537	10.9253	518.537	9.94916	518.537	10.6475	518.537	11.9877	518.537	25.6475	518.537	26.4545	518.537	15.7016	518.537	16.986	518.537	26.367	518.537	19.6339
	519.488	35.8523	519.488	26.4666	519.488	32.2854	519.488	28.6813	519.488	22.2332	519.488	9.76491	519.488	6.23713	519.488	8.87224	519.488	9.50961	519.488	20.6631	519.488	20.4265	519.488	13.5763	519.488	13.7461	519.488	18.9002	519.488	16.0869
	520.439	34.2513	520.439	24.7931	520.439	30.199	520.439	27.1859	520.439	21.0785	520.439	8.57239	520.439	2.65695	520.439	7.3919	520.439	7.28623	520.439	15.9098	520.439	14.9586	520.439	11.5783	520.439	11.2307	520.439	11.3476	520.439	12.8553
	521.39	32.6818	521.39	23.0212	521.39	28.279	521.39	26.2489	521.39	20.8864	521.39	7.42587	521.39	-0.64391	521.39	6.14982	521.39	5.17505	521.39	11.4085	521.39	9.94849	521.39	9.63134	521.39	9.26961	521.39	6.41071	521.39	9.38698
	522.341	31.1549	522.341	21.1406	522.341	26.4916	522.341	24.8406	522.341	21.5654	522.341	6.31437	522.341	-2.15512	522.341	5.01636	522.341	3.6059	522.341	7.17556	522.341	5.8541	522.341	8.27463	522.341	8.00558	522.341	3.00465	522.341	6.71259
	523.293	29.7028	523.293	19.2753	523.293	24.8574	523.293	23.5611	523.293	21.9743	523.293	5.33524	523.293	-3.6213	523.293	4.06675	523.293	2.16582	523.293	3.94	523.293	6.37362	523.293	7.22413	523.293	6.92718	523.293	0.88915	523.293	4.22719
	524.244	28.3151	524.244	17.4314	524.244	23.3529	524.244	22.2529	524.244	22.5167	524.244	4.53111	524.244	-5.05765	524.244	3.28555	524.244	0.98691	524.244	1.8691	524.244	7.26076	524.244	6.63007	524.244	5.85192	524.244	-0.08	524.244	3.45469
	525.195	26.994	525.195	15.6087	525.195	21.9553	525.195	20.8742	525.195	22.9629	525.195	3.89267	525.195	-6.33659	525.195	2.64207	525.195	0.19827	525.195	1.09415	525.195	6.88652	525.195	6.56543	525.195	4.75039	525.195	0.09274	525.195	4.34765
	526.146	25.7662	526.146	13.798	526.146	20.6392	526.146	19.5441	526.146	21.9879	526.146	3.33517	526.146	-7.04468	526.146	2.07685	526.146	0	526.146	1.81864	526.146	6.99698	526.146	7.04193	526.146	3.82056	526.146	1.68739	526.146	4.46487
	527.098	24.5699	527.098	11.9828	527.098	19.4117	527.098	18.1167	527.098	20.42	527.098	2.90568	527.098	-7.07098	527.098	1.70838	527.098	0.77487	527.098	1.67619	527.098	7.51379	527.098	7.63051	527.098	3.85539	527.098	6.62368	527.098	5.70381
	528.049	23.4112	528.049	10.2184	528.049	18.1883	528.049	16.8397	528.049	18.0638	528.049	2.25312	528.049	-6.68728	528.049	1.43913	528.049	1.42595	528.049	2.03125	528.049	8.303	528.049	8.73173	528.049	4.30447	528.049	11.2191	528.049	6.86231
	529	22.2625	529	8.4809	529	16.9892	529	15.7649	529	15.9557	529	1.76298	529	-5.99113	529	1.30542	529	1.97681	529	2.68622	529	9.29495	529	10.0162	529	5.19061	529	15.2232	529	7.90774
	529.951	21.1119	529.951	6.74718	529.951	15.8396	529.951	14.9186	529.951	14.9466	529.951	1.62356	529.951	-5.15729	529.951	1.33883	529.951	2.62383	529.951	3.26961	529.951	10.4316	529.951	11.1832	529.951	6.61419	529.951	18.6587	529.951	9.0813
	530.902	20.0664	530.902	5.0485	530.902	14.7489	530.902	14.3686	530.902	14.3827	530.902	1.34524	530.902	-4.15547	530.902	1.52605	530.902	3.72786	530.902	4.0207	530.902	11.7509	530.902	12.5184	530.902	8.61258	530.902	21.8257	530.902	11.6143
	531.854	19.0874	531.854	3.42765	531.854	13.7896	531.854	13.8308	531.854	15.2087	531.854	1.13754	531.854	-3.07336	531.854	1.93307	531.854	4.94132	531.854	5.00678	531.854	13.2139	531.854	13.6198	531.854	10.8099	531.854	25.0032	531.854	13.55
	532.805	18.1842	532.805	1.86658	532.805	12.9474	532.805	13.4209	532.805	16.458	532.805	1.20784	532.805	-1.81167	532.805	2.51695	532.805	6.35133	532.805	6.30252	532.805	14.8937	532.805	14.5663	532.805	13.3624	532.805	28.1366	532.805	15.2225
	533.756	17.3532	533.756	0.74917	533.756	12.2096	533.756	13.1118	533.756	17.276	533.756	1.75254	533.756	-0.37595	533.756	2.79902	533.756	7.91923	533.756	7.87662	533.756	16.6851	533.756	15.3051	533.756	15.6992	533.756	29.8057	533.756	16.5647
	534.707	16.5814	534.707	0.82281	534.707	11.5557	534.707	12.8215	534.707	16.6852	534.707	2.97108	534.707	1.17256	534.707	3.24412	534.707	9.54906	534.707	9.63556	534.707	18.3928	534.707	15.7246	534.707	16.9011	534.707	28.0811	534.707	17.3698
	535.659	15.8968	535.659	1.0557	535.659	11.0027	535.659	12.9629	535.659	12.1522	535.659	5.12089	535.659	2.62201	535.659	3.87362	535.659	11.5271	535.659	11.5819	535.659	20.0357	535.659	15.1888	535.659	17.0606	535.659	29.2866	535.659	17.6778
	536.61	15.2759	536.61	1.3327	536.61	10.5195	536.61	13.1288	536.61	10.8067	536.61	7.12844	536.61	3.93889	536.61	4.65653	536.61	13.6364	536.61	13.476	536.61	21.3011	536.61	14.4474	536.61	17.0302	536.61	30.2525	536.61	17.5378
	537.561	14.7187	537.561	1.61431	537.561	10.1175	537.561	13.2455	537.561	10.4362	537.561	9.09517	537.561	4.70886	537.561	5.56714	537.561	15.6712	537.561	15.4607	537.561	22.8715	537.561	13.5955	537.561	15.8063	537.561	30.8184	537.561	16.9651
	538.512	14.2364	538.512	1.87377	538.512	9.81173	538.512	13.384	538.512	10.0258	538.512	11.0595	538.512	5.17061	538.512	6.60083	538.512	17.4601	538.512	17.6339	538.512	24.3852	538.512	12.5484	538.512	13.5552	538.512	30.9872	538.512	15.9025
	539.463	13.8632	539.463	2.09045	539.463	9.6325	539.463	13.8434	539.463	9.83277	539.463	12.9873	539.463	6.5442	539.463	7.78598	539.463	18.8027	539.463	20.0769	539.463	23.8917	539.463	10.932	539.463	12.08	539.463	30.9695	539.463	14.1481
	540.415	13.5613	540.415	2.30219	540.415	9.66298	540.415	14.2808	540.415	9.63016	540.415	15.4223	540.415	7.96843	540.415	9.14562	540.415	20.2526	540.415	23.0671	540.415	23.3889	540.415	9.36016	540.415	11.3643	540.415	29.4405	540.415	11.9128
	541.366	13.3991	541.366	2.48541	541.366	9.8165	541.366	14.7292	541.366	9.50009	541.366	17.7858	541.366	9.77496	541.366	10.6901	541.366	21.8499	541.366	25.8702	541.366	22.094	541.366	7.5754	541.366	11.2598	541.366	28.3897	541.366	9.21464
	542.317	13.3341	542.317	2.65359	542.317	10.0705	542.317	15.1898	542.317	9.45363	542.317	19.989	542.317	11.8193	542.317	12.4107	542.317	23.5904	542.317	28.4766	542.317	20.1803	542.317	5.76281	542.317	11.1782	542.317	27.5413	542.317	6.84463
	543.268	13.3587	543.268	2.81191	543.268	10.4239	543.268	15.6617	543.268	9.49009	543.268	22.007	543.268	14.2113	543.268	14.303	543.268	25.464	543.268	30.9451	543.268	17.9002	543.268	4.08966	543.268	10.7266	543.268	26.5546	543.268	5.29302
	544.219	13.6827	544.219	2.91278	544.219	10.9758	544.219	16.1468	544.219	9.60413	544.219	23.8737	544.219	18.4629	544.219	16.4352	544.219	27.4846	544.219	33.3549	544.219	15.453	544.219	2.54859	544.219	10.386	544.219	25.505	544.219	3.73044
	545.171	14.1447	545.171	3.01484	545.171	11.5304	545.171	16.4245	545.171	9.59595	545.171	25.7139	545.171	20.5906	545.171	18.6805	545.171	29.3642	545.171	35.2426	545.171	12.6607	545.171	1.21136	545.171	10.1428	545.171	24.4007	545.171	2.49204
	546.122	14.6792	546.122	3.07532	546.122	12.1035	546.122	16.5738	546.122	9.66101	546.122	27.423	546.122	22.6728	546.122	21.0923	546.122	31.4171	546.122	37.0197	546.122	9.85559	546.122	0	546.122	9.86276	546.122	23.0386	546.122	1.36124
	547.073	15.2469	547.073	3.13272	547.073	12.6779	547.073	16.519	547.073	9.76748	547.073	29.15	547.073	24.9445	547.073	23.6568	547.073	33.5751	547.073	38.7771	547.073	7.26617	547.073	-0.39273	547.073	9.63868	547.073	21.5786	547.073	0.4203
	548.024	15.7923	548.024	3.23988	548.024	13.2093	548.024	16.1545	548.024	9.82161	548.024	31.0918	548.024	27.1688	548.024	26.3349	548.024	35.6281	548.024	40.5336	548.024	5.0877	548.024	-0.60212	548.024	9.62841	548.024	20.3113	548.024	-0.19869
	548.976	15.9849	548.976	3.23169	548.976	13.3974	548.976	15.5254	548.976	9.85984	548.976	32.7919	548.976	29.4844	548.976	29.1752	548.976	37.0259	548.976	42.3853	548.976	3.21467	548.976	-0.34994	548.976	9.89264	548.976	19.5841	548.976	-0.87417
	549.927	16.0907	549.927	3.22782	549.927	13.3602	549.927	14.8432	549.927	9.70573	549.927	34.7088	549.927	32.4899	549.927	31.7593	549.927	38.8563	549.927	44.4668	549.927	1.69772	549.927	0.56064	549.927	10.6522	549.927	19.2463	549.927	-0.92228
	550.878	16.0327	550.878	3.19983	550.878	13.1871	550.878	14.08	550.878	9.2677	550.878	36.683	550.878	35.7957	550.878	34.4037	550.878	41.2995	550.878	46.6478	550.878	0.64709	550.878	1.79956	550.878	11.7597	550.878	19.163	550.878	-0.00221
	551.829	15.7725	551.829	3.14522	551.829	12.8268	551.829	13.1305	551.829	8.62921	551.829	38.7674	551.829	39.297	551.829	36.7738	551.829	44.253	551.829	48.911	551.829	0.20253	551.829	3.34692	551.829	13.0745	551.829	19.4915	551.829	1.77978
	552.781	15.2964	552.781	3.08276	552.781	12.1023	552.781	11.7992	552.781	8.04658	552.781	41.2026	552.781	43.0862	552.781	37.9089	552.781	47.3411	552.781	51.3243	552.781	-0.04406	552.781	5.42301	552.781	14.4152	552.781	20.6649	552.781	4.10052
	553.732	14.4946	553.732	2.9983	553.732	10.9839	553.732	10.4691	553.732	7.41106	553.732	44.3996	553.732	45.6179	553.732	43.255	553.732	50.999	553.732	53.8646	553.732	2.41074	553.732	7.1886	553.732	16.2822	553.732	21.1267	553.732	8.24669
	554.683	13.3885	554.683	2.90244	554.683	9.62991	554.683	9.19725	554.683	6.70095	554.683	47.3394	554.683	49.8517	554.683	48.7199	554.683	54.3153	554.683	56.5341	554.683	4.46725	554.683	9.18836	554.683	18.1933	554.683	22.235	554.683	11.7199
	555.634	11.9521	555.634	2.82379	555.634	8.20232	555.634	8.00489	555.634	5.72786	555.634	50.1132	555.634	55.3622	555.634	54.3396	555.634	57.9532	555.634	59.3392	555.634	6.5478	555.634	11.335	555.634	20.3737	555.634	23.8889	555.634	15.5287
	556.585	10.1975	556.585	2.7673	556.585	6.81221	556.585	6.87571	556.585	4.56566	556.585	52.8271	556.585	61.8765	556.585	60.0758	556.585	62.0906	556.585	62.3006	556.585	9.06893	556.585	13.6229	556.585	22.8315	556.585	26.1502	556.585	20.316
	557.537	8.18748	557.537	2.68558	557.537	5.48619	557.537	5.7121	557.537	3.90852	557.537	55.5747	557.537	69.7584	557.537	65.4704	557.537	65.7856	557.537	65.4992	557.537	12.3958	557.537	16.2969	557.537	25.0621	557.537	29.6586	557.537	25.9783
	558.488	6.26144	558.488	2.62406	558.488	4.40437	558.488	4.61442	558.488	3.19064	558.488	58.9336	558.488	77.9796	558.488	72.6422	558.488	68.7358	558.488	68.7953	558.488	17.2163	558.488	19.0535	558.488	27.6646	558.488	32.6445	558.488	30.0161
	559.439	4.41554	559.439	2.53607	559.439	3.46271	559.439	3.65722	559.439	2.41436	559.439	61.8324	559.439	83.3786	559.439	77.8181	559.439	71.3544	559.439	72.1406	559.439	22.413	559.439	21.8114	559.439	30.6986	559.439	36.1026	559.439	33.0087
	560.39	2.73325	560.39	2.45136	560.39	2.71357	560.39	2.74017	560.39	1.63439	560.39	64.0243	560.39	86.3888	560.39	80.971	560.39	73.7161	560.39	75.2536	560.39	27.5728	560.39	24.4295	560.39	34.0111	560.39	40.1615	560.39	35.7642
	561.341	1.30022	561.341	2.40871	561.341	2.19327	561.341	1.79848	561.341	0.90085	561.341	65.4746	561.341	87.6962	561.341	82.7592	561.341	75.7843	561.341	77.8369	561.341	32.5388	561.341	26.8458	561.341	37.467	561.341	44.7597	561.341	38.8327
	562.293	0.21904	562.293	2.44645	562.293	1.78706	562.293	1.15085	562.293	0.19563	562.293	66.5214	562.293	85.697	562.293	84.3261	562.293	76.9859	562.293	79.5618	562.293	38.164	562.293	29.4863	562.293	41.3251	562.293	49.5836	562.293	40.8949
	563.244	-0.57625	563.244	2.30265	563.244	1.50311	563.244	0.72722	563.244	-0.26748	563.244	67.1078	563.244	83.9642	563.244	85.5836	563.244	77.3195	563.244	80.5135	563.244	43.471	563.244	32.4675	563.244	44.6412	563.244	53.397	563.244	43.4222
	564.195	-0.99653	564.195	2.11346	564.195	1.39289	564.195	0.37663	564.195	-0.65431	564.195	66.7894	564.195	81.6013	564.195	85.6191	564.195	75.3626	564.195	80.8461	564.195	48.5271	564.195	35.9335	564.195	48.6694	564.195	57.5741	564.195	46.9646
	565.146	-1.1759	565.146	2.07165	565.146	1.46189	565.146	0.11586	565.146	-0.77114	565.146	66.224	565.146	79.0007	565.146	84.0626	565.146	73.0355	565.146	80.6149	565.146	53.2506	565.146	39.8199	565.146	53.4548	565.146	62.2777	565.146	51.6412
	566.098	-1.44776	566.098	2.15893	566.098	1.6831	566.098	0.01121	566.098	-0.23612	566.098	66.4736	566.098	77.0169	566.098	80.9096	566.098	73.4303	566.098	79.8949	566.098	57.7209	566.098	43.9623	566.098	58.5784	566.098	67.235	566.098	57.405
	567.049	-1.25795	567.049	2.60295	567.049	2.15927	567.049	0.30937	567.049	0.5426	567.049	66.7556	567.049	75.2461	567.049	78.8243	567.049	73.5946	567.049	79.0469	567.049	66.4254	567.049	48.3597	567.049	63.7105	567.049	72.2675	567.049	65.1028
	568	-0.78028	568	3.05544	568	2.83782	568	0.79465	568	1.71081	568	66.8678	568	73.3966	568	77.8403	568	73.8226	568	78.4116	568	75.0106	568	52.8892	568	69.8952	568	77.0314	568	74.3672
	568.951	-0.08184	568.951	3.54694	568.951	3.70434	568.951	1.50965	568.951	3.02047	568.951	67.0665	568.951	71.9797	568.951	77.1248	568.951	73.8448	568.951	77.8249	568.951	83.7885	568.951	57.4449	568.951	76.0472	568.951	81.5072	568.951	84.0757
	569.902	0.738	569.902	4.11118	569.902	4.75623	569.902	2.46749	569.902	4.46565	569.902	67.7458	569.902	71.558	569.902	76.4618	569.902	73.596	569.902	77.2571	569.902	92.7723	569.902	62.0079	569.902	81.987	569.902	85.7168	569.902	93.0422
	570.854	1.52474	570.854	4.79155	570.854	5.99688	570.854	3.6546	570.854	6.24363	570.854	69.5072	570.854	72.8601	570.854	76.1078	570.854	73.174	570.854	76.7854	570.854	101.719	570.854	66.6288	570.854	88.2689	570.854	89.7283	570.854	99.7404
	571.805	2.19725	571.805	5.49179	571.805	7.59406	571.805	5.20315	571.805	8.14568	571.805	69.9264	571.805	73.1044	571.805	75.6174	571.805	72.8375	571.805	76.4223	571.805	109.529	571.805	71.4321	571.805	95.0836	571.805	94.6119	571.805	107.019
	572.756	3.32839	572.756	6.41946	572.756	9.44948	572.756	6.93529	572.756	10.2462	572.756	69.6837	572.756	74.2296	572.756	75.2309	572.756	72.7298	572.756	76.1169	572.756	116.788	572.756	76.4861	572.756	101.339	572.756	99.0807	572.756	113.051
	573.707	4.75566	573.707	7.66988	573.707	11.7077	573.707	8.95106	573.707	12.3957	573.707	69.2423	573.707	75.2743	573.707	74.9802	573.707	72.6909	573.707	76.304	573.707	121.418	573.707	81.5672	573.707	106.821	573.707	103.199	573.707	116.752
	574.659	6.3624	574.659	9.35183	574.659	14.369	574.659	11.2011	574.659	14.5428	574.659	68.8792	574.659	75.8893	574.659	74.8815	574.659	72.747	574.659	76.9758	574.659	122.429	574.659	86.5568	574.659	111.501	574.659	106.933	574.659	118.045
	575.61	8.15125	575.61	11.676	575.61	17.1762	575.61	13.337	575.61	16.8345	575.61	68.5693	575.61	76.9679	575.61	74.9461	575.61	73.3313	575.61	77.2572	575.61	120.554	575.61	91.528	575.61	115.588	575.61	109.943	575.61	118.595
	576.561	10.2277	576.561	14.4891	576.561	20.2534	576.561	15.6325	576.561	19.5081	576.561	68.1485	576.561	78.1039	576.561	75.2957	576.561	73.7003	576.561	78.5513	576.561	117.539	576.561	95.942	576.561	118.593	576.561	111.544	576.561	119.52
	577.512	12.5076	577.512	17.5157	577.512	23.487	577.512	18.327	577.512	22.2084	577.512	67.9901	577.512	79.2612	577.512	75.8978	577.512	73.9936	577.512	79.6284	577.512	113.44	577.512	99.661	577.512	120.566	577.512	111.131	577.512	120.088
	578.463	14.9402	578.463	20.6564	578.463	26.8485	578.463	21.0853	578.463	25.0046	578.463	66.8787	578.463	80.2835	578.463	76.6915	578.463	74.6488	578.463	81.0302	578.463	108.485	578.463	102.923	578.463	119.875	578.463	111.016	578.463	119.954
	579.415	17.4931	579.415	23.8418	579.415	30.3131	579.415	23.7298	579.415	27.9155	579.415	64.4658	579.415	81.1613	579.415	77.6229	579.415	75.945	579.415	83.1507	579.415	103.202	579.415	105.852	579.415	116.462	579.415	113.014	579.415	119.406
	580.366	20.2404	580.366	27.0745	580.366	33.8689	580.366	27.0086	580.366	30.5822	580.366	64.538	580.366	82.5401	580.366	78.7278	580.366	77.5145	580.366	85.1427	580.366	99.2173	580.366	107.781	580.366	117.11	580.366	115.962	580.366	121.179
	581.317	23.1319	581.317	30.3854	581.317	37.3869	581.317	30.5656	581.317	33.375	581.317	65.4776	581.317	84.1132	581.317	80.0296	581.317	79.3346	581.317	87.6066	581.317	98.0543	581.317	109.199	581.317	115.632	581.317	118.983	581.317	123.19
	582.268	26.1737	582.268	33.768	582.268	40.9462	582.268	34.4077	582.268	36.0501	582.268	66.4671	582.268	85.7053	582.268	81.5044	582.268	81.2174	582.268	90.6089	582.268	98.2143	582.268	110.896	582.268	117.318	582.268	122.024	582.268	124.997
	583.219	29.3691	583.219	37.2456	583.219	44.5164	583.219	38.5831	583.219	38.6504	583.219	67.8594	583.219	87.5321	583.219	83.0038	583.219	83.2371	583.219	94.0808	583.219	99.5525	583.219	113.005	583.219	121.424	583.219	124.992	583.219	126.417
	584.171	32.6998	584.171	40.8383	584.171	48.0416	584.171	43.0623	584.171	41.2812	584.171	70.1398	584.171	89.8196	584.171	84.6527	584.171	85.4742	584.171	97.8924	584.171	102.106	584.171	115.419	584.171	125.668	584.171	127.883	584.171	127.479
	585.122	36.0386	585.122	44.5131	585.122	51.4851	585.122	47.166	585.122	43.9448	585.122	72.5204	585.122	92.044	585.122	89.5593	585.122	87.5376	585.122	101.96	585.122	105.49	585.122	117.33	585.122	128.325	585.122	131.665	585.122	129.49
	586.073	39.3656	586.073	48.1275	586.073	54.7707	586.073	51.2984	586.073	46.8423	586.073	74.8729	586.073	92.3751	586.073	91.3615	586.073	89.3363	586.073	106.135	586.073	109.431	586.073	117.566	586.073	130.599	586.073	134.461	586.073	131.154
	587.024	42.4515	587.024	51.5841	587.024	57.9172	587.024	54.958	587.024	49.4894	587.024	76.0585	587.024	92.2991	587.024	92.7394	587.024	90.9225	587.024	109.456	587.024	114.511	587.024	117.422	587.024	132.762	587.024	136.789	587.024	132.86
	587.976	45.408	587.976	54.8044	587.976	60.8897	587.976	57.9878	587.976	51.833	587.976	76.0577	587.976	91.8479	587.976	93.95	587.976	92.1075	587.976	111.406	587.976	119.157	587.976	116.912	587.976	134.37	587.976	138.465	587.976	134.5
	588.927	48.5018	588.927	57.7156	588.927	63.6327	588.927	60.4277	588.927	54.0391	588.927	75.4239	588.927	90.4164	588.927	94.2455	588.927	92.6074	588.927	111.798	588.927	120.644	588.927	115.48	588.927	134.642	588.927	139.024	588.927	135.625
	589.878	51.2574	589.878	60.11	589.878	66.0683	589.878	63.0065	589.878	56.5381	589.878	74.4372	589.878	87.8113	589.878	95.0562	589.878	92.7736	589.878	113.732	589.878	117.753	589.878	112.752	589.878	133.671	589.878	139.197	589.878	133.02
	590.829	53.7163	590.829	62.0508	590.829	68.2633	590.829	65.5176	590.829	58.553	590.829	72.9347	590.829	85.0415	590.829	94.8279	590.829	92.1377	590.829	111.744	590.829	110.718	590.829	109.292	590.829	130.407	590.829	137.909	590.829	129.57
	591.781	55.921	591.781	63.6204	591.781	70.2981	591.781	67.5688	591.781	60.5447	591.781	71.1919	591.781	81.534	591.781	93.3831	591.781	90.8716	591.781	107.986	591.781	102.596	591.781	105.039	591.781	124.817	591.781	131.636	591.781	124.381
	592.732	57.9178	592.732	64.8904	592.732	72.1722	592.732	69.2004	592.732	62.5621	592.732	69.1307	592.732	77.8608	592.732	90.686	592.732	89.1179	592.732	103.265	592.732	94.4349	592.732	100.143	592.732	116.412	592.732	121.544	592.732	117.344
	593.683	59.7675	593.683	65.9393	593.683	73.8148	593.683	70.8474	593.683	64.2982	593.683	66.3508	593.683	75.7089	593.683	86.8348	593.683	87.0253	593.683	97.3537	593.683	85.6976	593.683	94.9731	593.683	104.252	593.683	113.194	593.683	109.052
	594.634	61.4168	594.634	66.9825	594.634	75.5727	594.634	72.4336	594.634	65.9027	594.634	61.1716	594.634	72.7075	594.634	81.717	594.634	84.8041	594.634	89.1046	594.634	77.1031	594.634	89.6071	594.634	93.4476	594.634	100.526	594.634	101.768
	595.585	62.7627	595.585	67.5915	595.585	77.4373	595.585	73.6943	595.585	67.5998	595.585	58.0622	595.585	70.6592	595.585	77.4452	595.585	82.5341	595.585	81.9754	595.585	68.7404	595.585	84.1895	595.585	84.0078	595.585	89.588	595.585	93.8039
	596.537	63.9763	596.537	68.4964	596.537	79.5323	596.537	75.1276	596.537	69.3024	596.537	56.3224	596.537	69.204	596.537	74.1338	596.537	79.913	596.537	76.8626	596.537	60.734	596.537	78.9795	596.537	76.0098	596.537	79.1044	596.537	85.7154
	597.488	65.1931	597.488	70.0914	597.488	81.9694	597.488	76.9191	597.488	71.0759	597.488	55.5082	597.488	68.0572	597.488	71.7764	597.488	77.1167	597.488	73.8221	597.488	53.1477	597.488	74.0187	597.488	69.0965	597.488	68.704	597.488	77.915
	598.439	66.5055	598.439	72.3144	598.439	84.8861	598.439	78.7845	598.439	73.2597	598.439	55.7344	598.439	67.0913	598.439	70.3004	598.439	75.126	598.439	71.786	598.439	45.9931	598.439	69.0174	598.439	62.2405	598.439	59.6196	598.439	70.6184
	599.39	68.1869	599.39	75.1967	599.39	88.2134	599.39	80.842	599.39	75.8675	599.39	54.9504	599.39	66.8955	599.39	70.2475	599.39	73.2649	599.39	70.5997	599.39	40.1555	599.39	64.4479	599.39	59.7034	599.39	51.9658	599.39	64.2607
	600.341	69.9835	600.341	78.4651	600.341	91.882	600.341	83.3114	600.341	78.3093	600.341	54.2187	600.341	67.3704	600.341	70.3405	600.341	71.4601	600.341	69.9356	600.341	34.6383	600.341	60.4681	600.341	57.0924	600.341	45.3731	600.341	57.9228
	601.293	71.8972	601.293	82.0809	601.293	95.8678	601.293	86.1073	601.293	80.6267	601.293	53.7356	601.293	68.9339	601.293	70.387	601.293	69.8826	601.293	70.2478	601.293	29.4575	601.293	56.7044	601.293	54.357	601.293	39.3047	601.293	51.9534
	602.244	73.9377	602.244	85.9984	602.244	100.128	602.244	89.1315	602.244	83.0429	602.244	53.5499	602.244	71.2104	602.244	70.619	602.244	68.6999	602.244	71.5843	602.244	24.7588	602.244	52.9209	602.244	50.9315	602.244	34.7987	602.244	46.6848
	603.195	76.1143	603.195	90.1643	603.195	104.612	603.195	92.3411	603.195	86.2071	603.195	53.5193	603.195	71.6293	603.195	72.3064	603.195	68.112	603.195	72.9221	603.195	20.9673	603.195	49.3395	603.195	43.8408	603.195	37.6938	603.195	42.3341
	604.146	78.4796	604.146	94.7281	604.146	109.332	604.146	95.7452	604.146	90.0629	604.146	55.5778	604.146	74.156	604.146	73.0266	604.146	67.7756	604.146	74.1132	604.146	18.1708	604.146	46.0291	604.146	41.5261	604.146	36.817	604.146	38.2383
	605.098	81.0055	605.098	99.4921	605.098	114.188	605.098	99.5669	605.098	94.1823	605.098	57.0921	605.098	74.7013	605.098	74.1976	605.098	67.9797	605.098	75.3341	605.098	16.6675	605.098	41.9496	605.098	39.4895	605.098	35.9279	605.098	36.2504
	606.049	83.7053	606.049	104.355	606.049	119.166	606.049	103.67	606.049	98.5034	606.049	58.1159	606.049	74.1407	606.049	75.8824	606.049	68.3552	606.049	76.6247	606.049	15.7886	606.049	38.3476	606.049	37.5848	606.049	35.3932	606.049	35.3289
	607	86.5822	607	109.327	607	124.223	607	107.887	607	103.106	607	59.0801	607	73.6588	607	78.0398	607	68.6055	607	77.9815	607	15.0625	607	36.3171	607	36.1258	607	35.0964	607	34.4457
	607.951	89.6163	607.951	114.899	607.951	129.15	607.951	112.171	607.951	108.563	607.951	60.4693	607.951	72.7802	607.951	81.0926	607.951	69.1532	607.951	79.304	607.951	15.5866	607.951	35.2152	607.951	35.0328	607.951	34.8155	607.951	34.4852
	608.902	92.7884	608.902	122.196	608.902	134	608.902	116.654	608.902	113.51	608.902	62.1106	608.902	72.9665	608.902	83.3035	608.902	69.6666	608.902	80.5852	608.902	16.8147	608.902	35.016	608.902	34.4109	608.902	35.6014	608.902	34.4518
	609.854	95.9638	609.854	127.702	609.854	138.721	609.854	120.908	609.854	117.48	609.854	63.6679	609.854	71.3351	609.854	84.3862	609.854	70.3053	609.854	80.9969	609.854	18.3398	609.854	35.523	609.854	33.9702	609.854	36.1309	609.854	34.4327
	610.805	99.0813	610.805	131.618	610.805	143.273	610.805	124.751	610.805	120.813	610.805	64.804	610.805	69.3075	610.805	84.822	610.805	70.9286	610.805	81.2263	610.805	20.0755	610.805	36.3378	610.805	33.7372	610.805	36.5265	610.805	34.4604
	611.756	102.104	611.756	134.918	611.756	147.622	611.756	128.142	611.756	123.705	611.756	65.4533	611.756	68.9336	611.756	85.2093	611.756	71.3591	611.756	82.1035	611.756	22.0006	611.756	37.1133	611.756	33.7801	611.756	37.234	611.756	34.5874
	612.707	105.037	612.707	137.611	612.707	151.642	612.707	131.514	612.707	123.717	612.707	67.4087	612.707	69.5878	612.707	85.3925	612.707	71.6501	612.707	82.8873	612.707	24.18	612.707	38.4219	612.707	34.0656	612.707	38.6919	612.707	35.1162
	613.659	107.301	613.659	139.872	613.659	155.315	613.659	134.162	613.659	125.081	613.659	69.1523	613.659	70.2048	613.659	85.2811	613.659	71.841	613.659	82.7391	613.659	26.2428	613.659	39.4571	613.659	34.5118	613.659	39.9713	613.659	36.3524
	614.61	109.216	614.61	141.522	614.61	158.619	614.61	136.404	614.61	126.149	614.61	70.7628	614.61	71.8734	614.61	84.9029	614.61	71.7324	614.61	83.0003	614.61	28.3539	614.61	40.6195	614.61	34.9822	614.61	41.1786	614.61	37.2662
	615.561	110.891	615.561	142.651	615.561	161.655	615.561	138.395	615.561	126.517	615.561	72.1525	615.561	73.9296	615.561	84.2254	615.561	71.334	615.561	83.5482	615.561	30.4571	615.561	41.5721	615.561	35.2892	615.561	42.6914	615.561	37.6709
	616.512	112.388	616.512	143.483	616.512	164.549	616.512	140.234	616.512	126.245	616.512	73.2097	616.512	75.3253	616.512	83.2109	616.512	70.8072	616.512	83.8067	616.512	32.3796	616.512	41.8544	616.512	35.276	616.512	44.7852	616.512	37.6842
	617.463	113.778	617.463	144.192	617.463	166.941	617.463	141.696	617.463	125.799	617.463	74.0832	617.463	78.1979	617.463	81.7885	617.463	71.0278	617.463	83.9093	617.463	33.494	617.463	42.548	617.463	35.3854	617.463	45.4132	617.463	37.4883
	618.415	115.205	618.415	145.105	618.415	168.444	618.415	142.881	618.415	126.129	618.415	75.1957	618.415	80.1939	618.415	79.9791	618.415	70.1502	618.415	83.6717	618.415	34.8025	618.415	41.598	618.415	35.0301	618.415	46.826	618.415	36.567
	619.366	116.721	619.366	146.401	619.366	169.458	619.366	144.461	619.366	127.303	619.366	75.6494	619.366	80.8025	619.366	77.9889	619.366	68.5064	619.366	83.3799	619.366	35.1287	619.366	40.4662	619.366	35.6003	619.366	47.3835	619.366	35.2817
	620.317	118.371	620.317	148.062	620.317	170.571	620.317	146.27	620.317	129.177	620.317	75.8085	620.317	79.5799	620.317	75.8298	620.317	66.1876	620.317	83.2015	620.317	34.5548	620.317	39.3541	620.317	36.1208	620.317	47.0462	620.317	33.6463
	621.268	120.2	621.268	149.978	621.268	172.483	621.268	147.791	621.268	131.416	621.268	76.4939	621.268	76.1552	621.268	73.4328	621.268	63.2261	621.268	83.1046	621.268	33.7532	621.268	37.9152	621.268	34.5821	621.268	46.5196	621.268	31.5592
	622.219	122.296	622.219	152.535	622.219	175.327	622.219	150.208	622.219	133.043	622.219	74.439	622.219	69.6724	622.219	70.7538	622.219	59.803	622.219	79.9123	622.219	31.9199	622.219	36.5059	622.219	32.8204	622.219	45.0808	622.219	29.4929
	623.171	124.622	623.171	155.704	623.171	178.482	623.171	152.181	623.171	134.987	623.171	71.1723	623.171	62.9152	623.171	66.3103	623.171	56.0035	623.171	76.91	623.171	29.2233	623.171	35.0095	623.171	30.3922	623.171	43.3266	623.171	27.3821
	624.122	127.197	624.122	159.442	624.122	182.062	624.122	153.887	624.122	137.823	624.122	67.2281	624.122	56.6183	624.122	61.3665	624.122	52.067	624.122	72.1752	624.122	25.8759	624.122	33.5572	624.122	27.9691	624.122	41.1574	624.122	25.2072
	625.073	130.003	625.073	163.688	625.073	186.121	625.073	156.017	625.073	141.347	625.073	62.2693	625.073	50.7704	625.073	56.4416	625.073	48.0241	625.073	65.6559	625.073	22.3908	625.073	31.9681	625.073	25.6949	625.073	38.8717	625.073	23.027
	626.024	132.993	626.024	168.331	626.024	190.659	626.024	159.607	626.024	144.888	626.024	55.4542	626.024	44.8605	626.024	51.622	626.024	43.782	626.024	58.5651	626.024	19.5031	626.024	29.8855	626.024	23.3909	626.024	37.0407	626.024	20.9618
	626.976	136.541	626.976	173.075	626.976	195.719	626.976	163.55	626.976	152.153	626.976	48.1492	626.976	38.6762	626.976	46.9212	626.976	39.4442	626.976	50.928	626.976	16.5436	626.976	28.7764	626.976	21.4441	626.976	35.3267	626.976	19.32
	627.927	141.537	627.927	178.634	627.927	201.562	627.927	168.987	627.927	158.413	627.927	41.552	627.927	32.9314	627.927	42.3159	627.927	34.1249	627.927	42.8385	627.927	13.5347	627.927	27.687	627.927	19.5223	627.927	33.6068	627.927	18.168
	628.878	146.678	628.878	184.648	628.878	208.164	628.878	175.307	628.878	164.461	628.878	35.4519	628.878	27.085	628.878	37.7263	628.878	28.8087	628.878	34.2719	628.878	10.771	628.878	26.9238	628.878	18.112	628.878	32.0675	628.878	17.3555
	629.829	151.667	629.829	190.936	629.829	215.299	629.829	182.062	629.829	170.722	629.829	29.808	629.829	21.2128	629.829	33.0361	629.829	24.1139	629.829	25.7824	629.829	8.21397	629.829	26.2736	629.829	17.0383	629.829	30.5299	629.829	16.8927
	630.781	157.034	630.781	197.451	630.781	222.541	630.781	188.897	630.781	177.34	630.781	24.7127	630.781	15.9226	630.781	28.0937	630.781	20.3857	630.781	18.4653	630.781	5.53629	630.781	25.0644	630.781	15.5462	630.781	28.4916	630.781	16.9199
	631.732	164.342	631.732	204.046	631.732	229.446	631.732	195.981	631.732	183.653	631.732	20.2772	631.732	11.3976	631.732	24.9087	631.732	17.1665	631.732	15.0111	631.732	3.45651	631.732	25.1782	631.732	15.544	631.732	27.4721	631.732	17.0505
	632.683	171.639	632.683	210.157	632.683	235.503	632.683	202.957	632.683	190.048	632.683	16.2284	632.683	8.82274	632.683	22.012	632.683	14.7008	632.683	11.8677	632.683	2.41086	632.683	24.9387	632.683	15.6257	632.683	25.8621	632.683	17.8585
	633.634	178.83	633.634	216.114	633.634	241.035	633.634	209.476	633.634	196.113	633.634	14.5637	633.634	8.25522	633.634	20.7615	633.634	14.1855	633.634	9.61677	633.634	2.33296	633.634	25.5292	633.634	16.5786	633.634	24.81	633.634	19.416
	634.585	185.829	634.585	222.646	634.585	246.108	634.585	215.371	634.585	201.659	634.585	15.5207	634.585	9.13121	634.585	20.7733	634.585	15.3983	634.585	8.73221	634.585	3.55008	634.585	27.2277	634.585	18.4619	634.585	24.5247	634.585	22.0189
	635.537	192.554	635.537	230.963	635.537	250.513	635.537	220.652	635.537	206.723	635.537	17.4707	635.537	10.2026	635.537	19.7661	635.537	16.5856	635.537	9.61438	635.537	6.85326	635.537	29.357	635.537	20.5589	635.537	24.2133	635.537	26.2367
	636.488	198.558	636.488	238.597	636.488	254.263	636.488	225.165	636.488	211.461	636.488	20.9868	636.488	12.9056	636.488	19.1599	636.488	16.7904	636.488	11.3454	636.488	12.2958	636.488	31.7635	636.488	24.0753	636.488	24.9761	636.488	31.0539
	637.439	204.255	637.439	245.687	637.439	257.489	637.439	229.142	637.439	214.024	637.439	25.4747	637.439	16.2503	637.439	18.6815	637.439	17.1894	637.439	13.4408	637.439	18.5642	637.439	34.119	637.439	28.5306	637.439	26.2299	637.439	36.1587
	638.39	208.823	638.39	255.933	638.39	259.971	638.39	233.424	638.39	216.172	638.39	30.4786	638.39	20.0388	638.39	18.2215	638.39	17.6342	638.39	15.5935	638.39	25.4648	638.39	36.2284	638.39	33.6109	638.39	27.8675	638.39	41.9149
	639.341	213.162	639.341	266.579	639.341	261.602	639.341	237.489	639.341	217.951	639.341	34.9146	639.341	23.9445	639.341	17.71	639.341	18.1641	639.341	17.6239	639.341	32.598	639.341	38.625	639.341	39.9871	639.341	29.2964	639.341	48.3272
	640.293	220.471	640.293	266.256	640.293	262.396	640.293	238.989	640.293	217.092	640.293	36.7962	640.293	27.4448	640.293	17.1201	640.293	19.0927	640.293	19.5002	640.293	39.2625	640.293	42.8281	640.293	49.6978	640.293	29.2406	640.293	54.9467
	641.244	218.021	641.244	262.658	641.244	260.827	641.244	235.571	641.244	213.854	641.244	37.585	641.244	31.8959	641.244	16.4257	641.244	19.479	641.244	20.8129	641.244	43.9909	641.244	42.7593	641.244	51.005	641.244	29.4252	641.244	60.0153
	642.195	213.525	642.195	256.717	642.195	258.7	642.195	230.417	642.195	209.111	642.195	36.9627	642.195	33.7149	642.195	15.6337	642.195	20.1935	642.195	22.0083	642.195	46.9639	642.195	41.782	642.195	50.8703	642.195	28.9842	642.195	63.8222
	643.146	204.32	643.146	246.941	643.146	255.12	643.146	222.677	643.146	202.895	643.146	35.795	643.146	33.9607	643.146	14.7701	643.146	20.7067	643.146	21.7967	643.146	47.0096	643.146	39.8743	643.146	49.7743	643.146	28.4271	643.146	65.0609
	644.098	191.312	644.098	233.074	644.098	249.223	644.098	212.97	644.098	195.068	644.098	34.0482	644.098	32.3954	644.098	13.8705	644.098	20.8624	644.098	20.3356	644.098	44.285	644.098	37.1787	644.098	47.0465	644.098	27.7727	644.098	62.3516
	645.049	180.962	645.049	216.55	645.049	240.121	645.049	204.183	645.049	185.171	645.049	30.2598	645.049	26.5319	645.049	12.9833	645.049	21.0907	645.049	19.946	645.049	40.8255	645.049	34.1792	645.049	40.4268	645.049	26.2463	645.049	53.9646
	646	167.986	646	203.646	646	228.519	646	194.611	646	175.385	646	26.9984	646	22.008	646	12.0932	646	19.1835	646	17.9274	646	36.0001	646	28.3512	646	36.6828	646	24.8998	646	47.9881
	646.951	154.351	646.951	191.099	646.951	216.419	646.951	185.005	646.951	166.564	646.951	23.5568	646.951	17.6803	646.951	11.0913	646.951	17.9952	646.951	16.2958	646.951	31.1077	646.951	24.1411	646.951	32.8837	646.951	23.749	646.951	41.9393
	647.902	140.775	647.902	178.678	647.902	204.146	647.902	175.198	647.902	158.218	647.902	20.1778	647.902	13.6576	647.902	9.90035	647.902	16.7617	647.902	14.8957	647.902	26.4807	647.902	20.8471	647.902	28.1711	647.902	22.2877	647.902	36.0438
	648.854	127.583	648.854	167.077	648.854	191.869	648.854	165.198	648.854	149.85	648.854	16.9968	648.854	10.0309	648.854	8.27781	648.854	15.0728	648.854	13.5955	648.854	22.0772	648.854	17.8518	648.854	23.062	648.854	20.2742	648.854	30.535
	649.805	114.584	649.805	158.372	649.805	179.624	649.805	155.34	649.805	141.008	649.805	13.937	649.805	6.81757	649.805	5.67316	649.805	13.2599	649.805	12.4376	649.805	17.3283	649.805	14.9845	649.805	20.1535	649.805	17.8755	649.805	25.5288
	650.756	101.92	650.756	149.065	650.756	167.424	650.756	145.191	650.756	132.386	650.756	10.8958	650.756	4.62622	650.756	4.37385	650.756	11.8628	650.756	11.2125	650.756	14.4171	650.756	12.2177	650.756	18.1073	650.756	15.0921	650.756	21.4642
	651.707	89.4915	651.707	140.559	651.707	155.365	651.707	135.275	651.707	124.347	651.707	9.20985	651.707	2.84849	651.707	3.2165	651.707	10.505	651.707	10.1681	651.707	13.3963	651.707	10.2347	651.707	16.2645	651.707	11.9721	651.707	18.0903
	652.659	77.401	652.659	132.583	652.659	143.641	652.659	127.625	652.659	116.796	652.659	7.97884	652.659	1.52111	652.659	2.19955	652.659	8.81508	652.659	8.85451	652.659	12.0915	652.659	8.52501	652.659	14.4843	652.659	8.9945	652.659	15.3207
	653.61	66.0242	653.61	124.943	653.61	132.38	653.61	122.172	653.61	110.171	653.61	6.6291	653.61	0.61568	653.61	1.33929	653.61	6.69441	653.61	7.19752	653.61	9.5064	653.61	6.77619	653.61	12.7523	653.61	6.41789	653.61	12.938
	654.561	56.2552	654.561	117.734	654.561	121.63	654.561	115.339	654.561	105.934	654.561	5.28554	654.561	-0.13359	654.561	0.60358	654.561	4.46838	654.561	5.78546	654.561	6.67876	654.561	5.08998	654.561	11.2303	654.561	4.13443	654.561	10.5119
	655.512	53.331	655.512	110.999	655.512	117.025	655.512	108.463	655.512	100.509	655.512	4.33649	655.512	0.11769	655.512	0.10297	655.512	2.23633	655.512	4.62838	655.512	4.56753	655.512	3.91711	655.512	9.31961	655.512	6.01309	655.512	8.33969
	656.463	48.0115	656.463	104.69	656.463	110.696	656.463	102.27	656.463	94.9153	656.463	3.41823	656.463	0.92809	656.463	-0.24271	656.463	0.80228	656.463	3.66248	656.463	2.74065	656.463	2.74218	656.463	7.70875	656.463	5.19557	656.463	6.57571
	657.415	41.9818	657.415	98.791	657.415	103.982	657.415	96.1984	657.415	89.1628	657.415	3.02919	657.415	2.14408	657.415	-0.54185	657.415	0	657.415	2.83178	657.415	1.19266	657.415	1.58768	657.415	6.05007	657.415	3.90507	657.415	4.98086
	658.366	36.5361	658.366	93.2956	658.366	97.9745	658.366	90.1013	658.366	83.4397	658.366	3.29965	658.366	3.24505	658.366	-0.7551	658.366	-0.43526	658.366	2.1445	658.366	-0.02391	658.366	0.61092	658.366	4.35047	658.366	3.34085	658.366	3.61653
	659.317	31.4961	659.317	88.2377	659.317	92.6851	659.317	84.6308	659.317	78.3246	659.317	3.72174	659.317	3.04143	659.317	-0.65844	659.317	-0.69015	659.317	1.72241	659.317	-0.76708	659.317	0.17071	659.317	3.44615	659.317	2.31979	659.317	3.10273
	660.268	27.1049	660.268	83.6189	660.268	87.982	660.268	79.6969	660.268	73.5459	660.268	4.36541	660.268	2.35817	660.268	-0.14949	660.268	0.20917	660.268	1.52978	660.268	-0.95775	660.268	0.37191	660.268	3.082	660.268	1.48555	660.268	2.23494
	661.219	23.176	661.219	79.3852	661.219	83.6629	661.219	75.2093	661.219	68.8452	661.219	5.11784	661.219	2.3759	661.219	0.86762	661.219	0.8772	661.219	1.75042	661.219	-0.83021	661.219	1.27267	661.219	2.93654	661.219	0.90336	661.219	1.94888
	662.171	19.7157	662.171	75.531	662.171	79.8112	662.171	71.1312	662.171	64.5242	662.171	6.30429	662.171	3.08571	662.171	2.39608	662.171	1.71395	662.171	2.3374	662.171	-0.34614	662.171	2.22526	662.171	3.10152	662.171	0.58566	662.171	2.69751
	663.122	16.7631	663.122	72.0452	663.122	76.4317	663.122	67.425	663.122	60.65	663.122	8.03607	663.122	4.33398	663.122	4.43475	663.122	2.99508	663.122	3.39273	663.122	0.86096	663.122	3.27988	663.122	3.64051	663.122	0.60311	663.122	4.00931
	664.073	14.4317	664.073	68.9304	664.073	73.4152	664.073	64.0726	664.073	56.8993	664.073	10.1417	664.073	5.85631	664.073	7.01785	664.073	4.69746	664.073	5.29995	664.073	2.56297	664.073	5.16869	664.073	4.56744	664.073	0.97949	664.073	5.19869
	665.024	12.5571	665.024	66.3254	665.024	70.8205	665.024	61.1716	665.024	54.3221	665.024	13.1297	665.024	8.58341	665.024	10.4332	665.024	8.66381	665.024	8.06954	665.024	4.71882	665.024	5.83544	665.024	7.06679	665.024	1.76097	665.024	8.22361
	665.976	10.8665	665.976	64.0578	665.976	68.4682	665.976	58.7407	665.976	52.1441	665.976	16.3413	665.976	11.7062	665.976	14.4274	665.976	13.7831	665.976	11.6659	665.976	7.81634	665.976	7.19876	665.976	9.65882	665.976	2.07346	665.976	11.3012
	666.927	9.1957	666.927	62.1524	666.927	66.3822	666.927	56.7092	666.927	50.2935	666.927	20.1582	666.927	15.4538	666.927	19.1525	666.927	18.9016	666.927	15.814	666.927	11.5438	666.927	10.2319	666.927	13.072	666.927	2.7316	666.927	15.2421
	667.878	7.48653	667.878	60.6155	667.878	64.5489	667.878	55.0186	667.878	48.833	667.878	24.7891	667.878	20.1782	667.878	24.6483	667.878	23.6	667.878	20.5987	667.878	15.707	667.878	14.8543	667.878	17.3934	667.878	4.60299	667.878	19.9996
	668.829	5.8301	668.829	59.4344	668.829	62.899	668.829	53.6525	668.829	48.0051	668.829	30.1695	668.829	26.4101	668.829	30.8061	668.829	28.5282	668.829	26.6925	668.829	20.3561	668.829	19.5584	668.829	21.6723	668.829	8.59902	668.829	24.1366
	669.781	4.28383	669.781	58.7826	669.781	61.5336	669.781	52.661	669.781	47.3026	669.781	35.5606	669.781	35.0072	669.781	38.2918	669.781	33.751	669.781	33.2552	669.781	25.9448	669.781	25.2386	669.781	27.6147	669.781	12.913	669.781	30.6361
	670.732	2.80395	670.732	58.4975	670.732	60.3826	670.732	51.8229	670.732	47.1238	670.732	41.8591	670.732	43.75	670.732	45.8957	670.732	39.8709	670.732	40.8202	670.732	32.2334	670.732	31.3818	670.732	33.5636	670.732	20.2455	670.732	37.2678
	671.683	1.3902	671.683	58.6285	671.683	59.4449	671.683	52.054	671.683	47.1685	671.683	48.957	671.683	53.3787	671.683	54.9742	671.683	47.1763	671.683	49.5934	671.683	39.299	671.683	37.5856	671.683	40.1115	671.683	30.6758	671.683	44.6227
	672.634	0	672.634	59.1374	672.634	58.7358	672.634	53.0686	672.634	47.4526	672.634	56.7938	672.634	64.1855	672.634	65.793	672.634	55.6273	672.634	59.6397	672.634	46.6042	672.634	43.7341	672.634	47.707	672.634	43.0245	672.634	53.1244
	673.585	0.19514	673.585	59.8747	673.585	58.2976	673.585	52.9757	673.585	48.4472	673.585	65.4384	673.585	75.7917	673.585	77.1342	673.585	64.8036	673.585	70.8959	673.585	52.7955	673.585	50.0837	673.585	56.5528	673.585	54.6246	673.585	62.9005
	674.537	0.50165	674.537	60.3004	674.537	58.2927	674.537	53.4699	674.537	49.2667	674.537	75.1384	674.537	88.9724	674.537	89.6306	674.537	75.473	674.537	83.9348	674.537	64.2926	674.537	56.4545	674.537	65.9622	674.537	67.3302	674.537	72.6667
	675.488	0.9431	675.488	60.4972	675.488	58.6397	675.488	53.7431	675.488	49.9031	675.488	85.7867	675.488	103.086	675.488	105.01	675.488	86.9176	675.488	97.9991	675.488	76.7709	675.488	62.5285	675.488	75.1042	675.488	79.2879	675.488	81.7734
	676.439	1.70683	676.439	60.5286	676.439	59.3577	676.439	54.0563	676.439	50.4808	676.439	96.6797	676.439	117.167	676.439	121.553	676.439	98.191	676.439	113.067	676.439	89.7903	676.439	70.0361	676.439	84.2409	676.439	89.051	676.439	90.4109
	677.39	2.87791	677.39	60.4578	677.39	60.5065	677.39	54.5966	677.39	51.1182	677.39	107.654	677.39	131.107	677.39	138.269	677.39	108.761	677.39	128.153	677.39	104.886	677.39	77.8482	677.39	93.0751	677.39	96.3213	677.39	98.094
	678.341	4.42583	678.341	60.3461	678.341	62.1934	678.341	55.4438	678.341	51.9224	678.341	119.17	678.341	145.774	678.341	155.084	678.341	118.572	678.341	141.19	678.341	125.727	678.341	81.5987	678.341	100.66	678.341	102.065	678.341	103.559
	679.293	6.54471	679.293	60.7268	679.293	64.6023	679.293	56.0891	679.293	53.3129	679.293	126.252	679.293	159.147	679.293	166.381	679.293	127.159	679.293	154.246	679.293	131.511	679.293	83.0837	679.293	106.149	679.293	106.348	679.293	113.188
	680.244	9.202	680.244	61.6618	680.244	67.6153	680.244	57.5654	680.244	54.7577	680.244	128.612	680.244	162.966	680.244	173.194	680.244	131.304	680.244	164.59	680.244	128.537	680.244	84.4236	680.244	111.065	680.244	102.195	680.244	113.623
	681.195	12.4187	681.195	63.3109	681.195	71.2698	681.195	59.5448	681.195	56.3965	681.195	126.8	681.195	157.872	681.195	166.676	681.195	129.488	681.195	170.714	681.195	121.431	681.195	84.7875	681.195	110.591	681.195	97.1137	681.195	109.8
	682.146	16.1524	682.146	65.7493	682.146	75.5787	682.146	62.0684	682.146	58.3962	682.146	121.751	682.146	146.503	682.146	150.466	682.146	123.276	682.146	169.288	682.146	112.781	682.146	83.7716	682.146	104.848	682.146	93.3937	682.146	103.878
	683.098	20.3152	683.098	68.9669	683.098	80.5298	683.098	65.5133	683.098	60.9477	683.098	114.743	683.098	133.284	683.098	139.505	683.098	117.014	683.098	155.657	683.098	103.233	683.098	81.4051	683.098	98.4815	683.098	88.4196	683.098	95.3226
	684.049	25.8871	684.049	72.9776	684.049	86.2977	684.049	69.7405	684.049	64.5998	684.049	106.108	684.049	120.281	684.049	125.064	684.049	109.162	684.049	141.934	684.049	92.673	684.049	78.3293	684.049	87.9253	684.049	83.4918	684.049	82.1455
	685	32.2226	685	77.5493	685	92.7344	685	74.6604	685	68.434	685	96.7206	685	107.199	685	112.327	685	100.918	685	127.061	685	81.7304	685	72.927	685	78.6715	685	77.1618	685	72.5088
	685.951	39.3091	685.951	82.6621	685.951	99.8247	685.951	80.3435	685.951	73.2964	685.951	87.1627	685.951	94.7387	685.951	99.9127	685.951	92.788	685.951	112.13	685.951	71.2575	685.951	68.1254	685.951	69.7705	685.951	71.4033	685.951	64.1832
	686.902	47.0973	686.902	88.3632	686.902	107.647	686.902	86.8434	686.902	78.8876	686.902	77.8247	686.902	83.3799	686.902	87.5136	686.902	84.8884	686.902	97.9914	686.902	62.7636	686.902	64.2885	686.902	61.1286	686.902	65.9658	686.902	56.413
	687.854	55.5035	687.854	94.664	687.854	116.3	687.854	94.2267	687.854	84.1498	687.854	68.9885	687.854	73.4087	687.854	75.7111	687.854	77.083	687.854	85.2838	687.854	57.9796	687.854	59.9457	687.854	53.3293	687.854	59.0901	687.854	49.5094
	688.805	64.7643	688.805	99.8319	688.805	125.112	688.805	103.722	688.805	91.0641	688.805	61.8623	688.805	65.0514	688.805	67.4095	688.805	70.3977	688.805	74.2994	688.805	52.7726	688.805	56.2346	688.805	48.0709	688.805	53.1841	688.805	43.4533
	689.756	74.5781	689.756	111.088	689.756	137.093	689.756	113.686	689.756	99.861	689.756	55.6591	689.756	59.2291	689.756	60.7631	689.756	65.1948	689.756	66.6256	689.756	48.5517	689.756	52.3983	689.756	44.0259	689.756	46.9241	689.756	42.0744
	690.707	87.1627	690.707	124.649	690.707	150.066	690.707	125.068	690.707	110.124	690.707	50.6054	690.707	55.0359	690.707	56.7663	690.707	60.8672	690.707	59.8474	690.707	45.972	690.707	49.9914	690.707	40.8426	690.707	42.5961	690.707	41.342
	691.659	102.068	691.659	139.543	691.659	163.029	691.659	137.989	691.659	121.59	691.659	46.9998	691.659	51.7164	691.659	55.0077	691.659	57.5087	691.659	53.9402	691.659	45.4576	691.659	49.5178	691.659	38.962	691.659	40.1975	691.659	40.2741
	692.61	117.263	692.61	155.99	692.61	175.613	692.61	151.91	692.61	134.081	692.61	45.1138	692.61	48.7978	692.61	54.2782	692.61	55.4752	692.61	50.0448	692.61	47.2241	692.61	50.7137	692.61	39.0729	692.61	38.4373	692.61	39.6375
	693.561	131.343	693.561	170.008	693.561	187.5	693.561	164.574	693.561	148.197	693.561	45.073	693.561	49.3217	693.561	54.8684	693.561	53.8723	693.561	47.3489	693.561	51.5364	693.561	51.9412	693.561	39.791	693.561	37.2732	693.561	40.7598
	694.512	144.594	694.512	183.434	694.512	198.423	694.512	176.369	694.512	160.049	694.512	48.8752	694.512	49.798	694.512	56.4731	694.512	54.25	694.512	46.3789	694.512	54.8886	694.512	53.9425	694.512	42.1249	694.512	37.2815	694.512	43.3011
	695.463	157.192	695.463	196.41	695.463	208.72	695.463	186.613	695.463	169.744	695.463	51.9484	695.463	51.5764	695.463	58.7729	695.463	55.7027	695.463	47.0185	695.463	59.9752	695.463	56.9015	695.463	45.6669	695.463	39.2988	695.463	47.4349
	696.415	166.686	696.415	203.448	696.415	216.514	696.415	191.506	696.415	175.413	696.415	54.5491	696.415	54.5074	696.415	61.6525	696.415	57.8424	696.415	49.2895	696.415	66.1296	696.415	61.2403	696.415	50.1726	696.415	42.6946	696.415	52.1982
	697.366	168.546	697.366	198.278	697.366	218.402	697.366	187.361	697.366	174.566	697.366	58.6593	697.366	57.9957	697.366	65.0308	697.366	60.6448	697.366	53.2065	697.366	71.736	697.366	67.2408	697.366	55.5658	697.366	46.4342	697.366	56.5743
	698.317	149.038	698.317	185.732	698.317	205.159	698.317	180.344	698.317	164.894	698.317	63.7168	698.317	63.4434	698.317	68.6845	698.317	65.7009	698.317	58.9855	698.317	79.4565	698.317	73.747	698.317	63.0803	698.317	51.9024	698.317	63.4563
	699.268	133.74	699.268	169.88	699.268	189.696	699.268	166.178	699.268	151.628	699.268	70.2591	699.268	70.9065	699.268	74.1401	699.268	71.424	699.268	66.5562	699.268	88.9417	699.268	82.3058	699.268	71.8202	699.268	59.7775	699.268	70.9684
	700.219	118.671	700.219	152.741	700.219	173.252	700.219	149.767	700.219	137.551	700.219	78.0818	700.219	79.0534	700.219	81.4999	700.219	78.4299	700.219	75.6393	700.219	100.043	700.219	92.2413	700.219	82.2687	700.219	70.2423	700.219	79.8576
	701.171	103.187	701.171	134.14	701.171	155.929	701.171	133.293	701.171	123.166	701.171	87.2037	701.171	87.7497	701.171	90.6928	701.171	86.7948	701.171	86.1834	701.171	112.914	701.171	103.69	701.171	94.5627	701.171	82.6782	701.171	90.5403
	702.122	87.7022	702.122	114.134	702.122	137.669	702.122	117.734	702.122	108.449	702.122	97.8026	702.122	97.3774	702.122	101.647	702.122	96.4945	702.122	98.1356	702.122	127.71	702.122	117.049	702.122	108.708	702.122	96.7654	702.122	103.287
	703.073	72.9981	703.073	96.9454	703.073	119.018	703.073	101.736	703.073	93.968	703.073	110.987	703.073	109.417	703.073	115.153	703.073	108.244	703.073	111.563	703.073	144.69	703.073	133.334	703.073	125.141	703.073	115.688	703.073	118.669
	704.024	58.8672	704.024	84.7923	704.024	100.397	704.024	87.6029	704.024	81.6356	704.024	125.58	704.024	124.547	704.024	132.026	704.024	122.008	704.024	127.616	704.024	164.701	704.024	151.529	704.024	143.565	704.024	136.494	704.024	137.681
	704.976	48.8332	704.976	73.9261	704.976	82.7715	704.976	75.1582	704.976	70.8434	704.976	142.301	704.976	141.364	704.976	151.306	704.976	137.455	704.976	143.773	704.976	186.647	704.976	172.833	704.976	164.28	704.976	161.363	704.976	159.186
	705.927	41.2514	705.927	63.8834	705.927	68.8254	705.927	64.9145	705.927	61.6291	705.927	161.034	705.927	161.552	705.927	175.082	705.927	154.648	705.927	160.697	705.927	211.067	705.927	197.552	705.927	188.402	705.927	189.139	705.927	185.669
	706.878	33.9976	706.878	54.7663	706.878	59.9167	706.878	57.0483	706.878	53.9184	706.878	181.614	706.878	187.211	706.878	204.804	706.878	173.771	706.878	179.274	706.878	239.369	706.878	225.036	706.878	216.244	706.878	219.279	706.878	218.603
	707.829	27.1662	707.829	46.6134	707.829	52.5174	707.829	50.5886	707.829	47.1484	707.829	204.7	707.829	220.595	707.829	238.679	707.829	195.528	707.829	199.227	707.829	275.459	707.829	252.626	707.829	245.524	707.829	256.196	707.829	254.677
	708.781	21.9748	708.781	39.7134	708.781	47.3879	708.781	45.7107	708.781	41.1263	708.781	233.579	708.781	273.67	708.781	276.7	708.781	219.654	708.781	251.32	708.781	312.184	708.781	282.168	708.781	283.821	708.781	296.221	708.781	294.718
	709.732	17.3964	709.732	33.7344	709.732	42.978	709.732	41.3857	709.732	35.8515	709.732	265.393	709.732	328.032	709.732	319.471	709.732	246.68	709.732	301.356	709.732	351.404	709.732	317.039	709.732	331.182	709.732	339.612	709.732	339.658
	710.683	13.3779	710.683	28.6532	710.683	38.9823	710.683	37.2265	710.683	31.1121	710.683	301.252	710.683	383.32	710.683	367.412	710.683	275.97	710.683	350.406	710.683	392.659	710.683	355.479	710.683	383.521	710.683	389.429	710.683	389.478
	711.634	9.91937	711.634	24.429	711.634	35.2734	711.634	33.2366	711.634	26.8278	711.634	341.576	711.634	440.085	711.634	419.569	711.634	307.515	711.634	400.599	711.634	435.722	711.634	394.594	711.634	436.421	711.634	445.122	711.634	444.2
	712.585	6.95175	712.585	20.9996	712.585	31.839	712.585	30.1258	712.585	23.3132	712.585	384.712	712.585	496.426	712.585	472.575	712.585	343.209	712.585	447.409	712.585	481.68	712.585	430.661	712.585	486.245	712.585	498.255	712.585	504.698
	713.537	4.4919	713.537	18.2177	713.537	28.5341	713.537	27.361	713.537	20.28	713.537	424.781	713.537	544.522	713.537	521.19	713.537	380.109	713.537	495.586	713.537	527.106	713.537	462.379	713.537	537.347	713.537	549.561	713.537	564.878
	714.488	2.5383	714.488	15.7251	714.488	25.4481	714.488	24.4784	714.488	17.6504	714.488	461.107	714.488	582.252	714.488	567.011	714.488	433.414	714.488	536.085	714.488	572.782	714.488	485.024	714.488	574.665	714.488	597.274	714.488	598.223
	715.439	1.07483	715.439	13.6638	715.439	22.4906	715.439	21.3522	715.439	15.3232	715.439	489.806	715.439	606.725	715.439	589.408	715.439	469.876	715.439	568.063	715.439	601.586	715.439	501.199	715.439	594.522	715.439	635.498	715.439	615.357
	716.39	0.06237	716.39	12.0375	716.39	19.6616	716.39	18.1654	716.39	13.1824	716.39	506.15	716.39	611.8	716.39	588.752	716.39	477.875	716.39	589.28	716.39	605.141	716.39	507.695	716.39	597.806	716.39	651.491	716.39	621.934
	717.341	-0.54913	717.341	10.6434	717.341	17.0995	717.341	15.4717	717.341	11.1095	717.341	504.461	717.341	586.861	717.341	594.283	717.341	478.202	717.341	594.821	717.341	587.861	717.341	492.927	717.341	589.991	717.341	623.915	717.341	613.386
	718.293	-0.62041	718.293	9.47519	718.293	15.0367	718.293	13.5012	718.293	9.71381	718.293	463.867	718.293	531.281	718.293	516.387	718.293	471.938	718.293	566.8	718.293	554.38	718.293	466.582	718.293	548.978	718.293	554.044	718.293	570.309
	719.244	-0.31453	719.244	8.57376	719.244	13.1891	719.244	11.6022	719.244	8.3969	719.244	420.897	719.244	470.152	719.244	450.464	719.244	452.906	719.244	517.663	719.244	518.516	719.244	436.716	719.244	498.487	719.244	482.654	719.244	517.21
	720.195	0.21658	720.195	7.46927	720.195	11.5701	720.195	9.84241	720.195	7.44865	720.195	377.945	720.195	406.529	720.195	393.097	720.195	424.225	720.195	457.254	720.195	475.937	720.195	403.275	720.195	444.399	720.195	420.517	720.195	458.667
	721.146	0.91043	721.146	6.01128	721.146	10.1671	721.146	8.03922	721.146	6.69396	721.146	336.782	721.146	346.122	721.146	341.306	721.146	390.028	721.146	392.331	721.146	427.49	721.146	367.022	721.146	382.441	721.146	368.434	721.146	399.215
	722.098	1.76748	722.098	4.35775	722.098	8.94441	722.098	5.84204	722.098	5.62624	722.098	298.588	722.098	296	722.098	293.207	722.098	354.959	722.098	327.174	722.098	378.548	722.098	329.64	722.098	303.413	722.098	319.11	722.098	342.925
	723.049	1.88359	723.049	3.14176	723.049	7.94166	723.049	3.77758	723.049	5.15917	723.049	261.418	723.049	247.974	723.049	249.245	723.049	319.479	723.049	274.552	723.049	333.79	723.049	296.612	723.049	271.106	723.049	274.365	723.049	286.2
	724	1.2837	724	2.05505	724	7.20834	724	2.02709	724	4.1445	724	228.829	724	209.412	724	211.144	724	284.446	724	229.375	724	291.969	724	265.426	724	241.344	724	235.31	724	244.159
	724.951	0.85916	724.951	1.29876	724.951	6.64746	724.951	0.94614	724.951	3.37569	724.951	198.14	724.951	176.579	724.951	177.461	724.951	250.604	724.951	190.331	724.951	251.833	724.951	236.705	724.951	213.686	724.951	200.932	724.951	209.858
	725.902	0.62653	725.902	0.82155	725.902	6.26292	725.902	0.32937	725.902	3.10116	725.902	168.966	725.902	147.915	725.902	148.562	725.902	219.149	725.902	158.167	725.902	214.124	725.902	210.154	725.902	187.085	725.902	170.696	725.902	180.094
	726.854	0.60208	726.854	0.46622	726.854	6.08141	726.854	0.41214	726.854	3.22036	726.854	142.203	726.854	122.851	726.854	125.521	726.854	191.396	726.854	133.947	726.854	180.444	726.854	185.001	726.854	160.564	726.854	144.35	726.854	153.678
	727.805	0.8364	727.805	0.3443	727.805	5.96309	727.805	0.73571	727.805	2.97647	727.805	120.423	727.805	101.591	727.805	109.434	727.805	168.62	727.805	115.266	727.805	152.118	727.805	161.154	727.805	136.626	727.805	123.472	727.805	132.3
	728.756	1.17888	728.756	0.43593	728.756	6.03515	728.756	1.27443	728.756	2.79083	728.756	100.635	728.756	87.7489	728.756	95.8712	728.756	146.686	728.756	100.468	728.756	127.37	728.756	140.262	728.756	119.024	728.756	105.272	728.756	113.913
	729.707	1.60599	729.707	0.62434	729.707	6.20592	729.707	2.23057	729.707	2.67792	729.707	82.8624	729.707	77.0109	729.707	84.4343	729.707	126.709	729.707	88.036	729.707	107.33	729.707	122.834	729.707	104.943	729.707	88.6891	729.707	98.2166
	730.659	2.09734	730.659	0.54779	730.659	6.41029	730.659	3.23884	730.659	2.68416	730.659	68.0128	730.659	68.4323	730.659	74.4225	730.659	109.389	730.659	77.5003	730.659	91.2975	730.659	106.387	730.659	92.5956	730.659	74.3548	730.659	84.8335
	731.61	2.63643	731.61	0.55274	731.61	6.43106	731.61	3.87045	731.61	2.87169	731.61	56.7608	731.61	61.6893	731.61	65.4243	731.61	94.8418	731.61	68.4109	731.61	77.9993	731.61	89.2366	731.61	80.7021	731.61	62.7515	731.61	73.3557
	732.561	3.23462	732.561	0.69114	732.561	5.39857	732.561	4.09397	732.561	3.35908	732.561	48.4804	732.561	55.7204	732.561	58.9147	732.561	81.8518	732.561	59.6487	732.561	66.799	732.561	76.6591	732.561	69.3485	732.561	52.3369	732.561	63.868
	733.512	3.84858	733.512	1.17536	733.512	-0.41436	733.512	4.51558	733.512	3.88995	733.512	42.1396	733.512	49.9885	733.512	53.2378	733.512	71.5428	733.512	51.9335	733.512	57.3538	733.512	65.7948	733.512	60.3276	733.512	44.6745	733.512	54.2394
	734.463	4.47354	734.463	1.74932	734.463	1.39857	734.463	4.69194	734.463	4.42887	734.463	37.425	734.463	44.9937	734.463	47.4041	734.463	63.0847	734.463	45.3343	734.463	49.0662	734.463	56.3089	734.463	52.8659	734.463	38.3575	734.463	46.1305
	735.415	5.13964	735.415	2.36538	735.415	6.2982	735.415	4.80458	735.415	5.05896	735.415	33.9973	735.415	40.6328	735.415	42.7273	735.415	55.8748	735.415	39.8979	735.415	42.104	735.415	48.1586	735.415	46.5999	735.415	33.5568	735.415	39.496
	736.366	5.83346	736.366	3.01271	736.366	9.07709	736.366	5.03988	736.366	5.79396	736.366	31.5068	736.366	36.6835	736.366	38.9961	736.366	49.6306	736.366	35.5637	736.366	36.2778	736.366	41.2449	736.366	41.257	736.366	30.0544	736.366	34.0088
	737.317	6.44224	737.317	3.70244	737.317	8.99266	737.317	5.40262	737.317	6.47284	737.317	29.7163	737.317	32.9093	737.317	32.1663	737.317	44.8107	737.317	32.1604	737.317	30.537	737.317	35.3916	737.317	36.7559	737.317	26.4816	737.317	29.3857
	738.268	7.01002	738.268	4.49423	738.268	9.19761	738.268	4.84437	738.268	7.1355	738.268	29.2662	738.268	29.3963	738.268	27.9703	738.268	40.9493	738.268	29.3126	738.268	25.522	738.268	30.5861	738.268	33.1024	738.268	23.2858	738.268	25.5651
	739.219	7.13701	739.219	4.98083	739.219	9.28344	739.219	4.60562	739.219	7.34927	739.219	28.8966	739.219	25.9357	739.219	24.5218	739.219	37.5394	739.219	26.0888	739.219	21.1723	739.219	26.5639	739.219	28.8805	739.219	18.7305	739.219	22.2226
	740.171	6.88793	740.171	5.30601	740.171	9.22405	740.171	3.95728	740.171	7.39661	740.171	28.8214	740.171	22.7559	740.171	21.5751	740.171	34.6418	740.171	23.0403	740.171	17.4603	740.171	23.2551	740.171	24.7114	740.171	15.3629	740.171	19.0071
	741.122	6.36127	741.122	5.52849	741.122	8.94814	741.122	2.63303	741.122	7.38045	741.122	28.8635	741.122	19.7191	741.122	18.9945	741.122	32.0335	741.122	20.4049	741.122	14.1695	741.122	20.5113	741.122	21.0739	741.122	13.8422	741.122	16.0571
	742.073	5.66137	742.073	5.5813	742.073	8.33302	742.073	1.0278	742.073	7.15676	742.073	28.2312	742.073	16.2912	742.073	16.6999	742.073	29.1485	742.073	17.974	742.073	10.9092	742.073	18.0942	742.073	18.1269	742.073	12.467	742.073	14.0142
	743.024	4.92883	743.024	5.60399	743.024	8.03179	743.024	0.418	743.024	6.64051	743.024	20.0174	743.024	13.4304	743.024	15.0711	743.024	24.747	743.024	15.6766	743.024	8.47094	743.024	15.5722	743.024	15.2791	743.024	11.6278	743.024	11.4888
	743.976	4.16949	743.976	5.5388	743.976	7.79272	743.976	-0.02942	743.976	6.10936	743.976	16.4344	743.976	10.9125	743.976	13.9917	743.976	21.3994	743.976	13.5495	743.976	6.07743	743.976	13.0216	743.976	12.9575	743.976	9.76922	743.976	9.32863
	744.927	3.44138	744.927	5.4428	744.927	7.5665	744.927	-0.37142	744.927	5.53411	744.927	14.3892	744.927	7.8758	744.927	13.3336	744.927	18.7837	744.927	11.5776	744.927	4.08815	744.927	10.7015	744.927	10.8153	744.927	8.04095	744.927	7.42539
	745.878	2.76913	745.878	5.33346	745.878	7.36268	745.878	-0.57638	745.878	4.8432	745.878	12.6497	745.878	4.84071	745.878	12.97	745.878	16.7479	745.878	9.76553	745.878	2.41949	745.878	8.15572	745.878	8.95312	745.878	6.67436	745.878	5.74529
	746.829	2.16198	746.829	5.20628	746.829	7.22015	746.829	-0.53687	746.829	3.99285	746.829	11.1297	746.829	2.93751	746.829	12.7903	746.829	15.169	746.829	8.12264	746.829	0.8144	746.829	4.87712	746.829	7.63198	746.829	5.38939	746.829	4.29958
	747.781	1.69889	747.781	5.07529	747.781	7.13009	747.781	0.12133	747.781	3.38073	747.781	9.76865	747.781	1.31038	747.781	12.9139	747.781	13.4018	747.781	6.64684	747.781	0	747.781	3.74187	747.781	6.20619	747.781	4.50162	747.781	3.17511
	748.732	1.35616	748.732	4.92312	748.732	7.05393	748.732	1.11331	748.732	2.88219	748.732	8.48021	748.732	0.37884	748.732	13.2078	748.732	11.6602	748.732	5.41718	748.732	-0.03748	748.732	2.87786	748.732	5.36458	748.732	4.21462	748.732	2.51842
	749.683	1.20121	749.683	4.74615	749.683	6.98265	749.683	1.93408	749.683	2.43616	749.683	7.41356	749.683	-0.10301	749.683	13.6426	749.683	10.6475	749.683	4.37597	749.683	0.41994	749.683	2.3081	749.683	4.55608	749.683	3.75306	749.683	2.14604
	750.634	1.26878	750.634	4.5454	750.634	6.90493	750.634	2.7201	750.634	1.95206	750.634	6.22433	750.634	-0.25854	750.634	14.1829	750.634	10.0314	750.634	3.47468	750.634	1.35606	750.634	2.31908	750.634	3.47852	750.634	3.29426	750.634	2.11322
	751.585	1.54603	751.585	4.32414	751.585	6.81253	751.585	3.64354	751.585	1.39877	751.585	4.76509	751.585	-0.10305	751.585	14.8291	751.585	9.40817	751.585	2.70387	751.585	2.61374	751.585	2.74267	751.585	2.00978	751.585	3.19777	751.585	2.3876
	752.537	1.91872	752.537	4.0832	752.537	6.71033	752.537	4.29776	752.537	0.99918	752.537	4.16897	752.537	0.69814	752.537	15.7463	752.537	9.32604	752.537	2.4687	752.537	4.00685	752.537	2.85194	752.537	0.39293	752.537	2.95774	752.537	2.69545
	753.488	2.38108	753.488	3.7985	753.488	6.54575	753.488	4.88995	753.488	0.3162	753.488	3.88194	753.488	2.04383	753.488	16.1421	753.488	9.60281	753.488	1.56542	753.488	5.56656	753.488	3.58677	753.488	0	753.488	3.22034	753.488	3.18247
	754.439	2.88931	754.439	3.51893	754.439	6.34372	754.439	5.40251	754.439	0.05769	754.439	3.74659	754.439	3.6609	754.439	15.8341	754.439	10.015	754.439	1.29019	754.439	7.33777	754.439	3.91286	754.439	-0.11396	754.439	3.82596	754.439	4.03077
	755.39	3.36347	755.39	3.24815	755.39	6.20593	755.39	5.78182	755.39	0.2769	755.39	3.83486	755.39	5.49099	755.39	15.0808	755.39	10.5851	755.39	1.717	755.39	9.13066	755.39	4.55747	755.39	0.15106	755.39	4.70888	755.39	5.39927
	756.341	3.74101	756.341	3.00721	756.341	6.16489	756.341	6.06574	756.341	0.82251	756.341	4.14679	756.341	7.48762	756.341	14.1346	756.341	11.3708	756.341	2.81625	756.341	10.7633	756.341	6.08168	756.341	1.17039	756.341	5.79124	756.341	7.27628
	757.293	3.99934	757.293	2.85473	757.293	6.12027	757.293	6.44523	757.293	1.36553	757.293	4.71351	757.293	9.62084	757.293	13.1014	757.293	12.4465	757.293	4.68866	757.293	12.1297	757.293	8.38362	757.293	3.15256	757.293	6.97876	757.293	9.41409
	758.244	4.15383	758.244	2.5265	758.244	6.08378	758.244	6.54474	758.244	1.98142	758.244	5.86895	758.244	11.7453	758.244	12.2975	758.244	13.6657	758.244	7.18253	758.244	15.2792	758.244	10.8109	758.244	5.77831	758.244	9.15988	758.244	12.1762
	759.195	4.26399	759.195	2.184	759.195	6.0673	759.195	5.92184	759.195	2.22756	759.195	6.64852	759.195	13.7274	759.195	11.5289	759.195	15.2023	759.195	9.80892	759.195	18.2886	759.195	13.4909	759.195	8.91118	759.195	11.1669	759.195	14.2998
	760.146	4.60777	760.146	1.82263	760.146	6.05786	760.146	5.35793	760.146	2.33135	760.146	7.76369	760.146	15.9046	760.146	11.2162	760.146	16.873	760.146	12.6202	760.146	21.8708	760.146	16.2835	760.146	13.1353	760.146	12.7227	760.146	17.2127
	761.098	5.04169	761.098	1.47106	761.098	6.04689	761.098	5.0771	761.098	2.37637	761.098	9.31669	761.098	18.2303	761.098	11.8462	761.098	18.5223	761.098	15.6293	761.098	25.9696	761.098	19.0997	761.098	17.8561	761.098	14.8485	761.098	21.1063
	762.049	5.11217	762.049	1.18098	762.049	6.02964	762.049	4.8079	762.049	2.31634	762.049	10.9345	762.049	20.3456	762.049	13.861	762.049	20.0478	762.049	18.7846	762.049	29.9919	762.049	21.932	762.049	21.7069	762.049	19.3141	762.049	25.109
	763	4.89717	763	0.92673	763	5.98854	763	4.40558	763	2.21188	763	13.2747	763	22.0905	763	16.9852	763	21.5236	763	21.7216	763	35.5296	763	25.1835	763	26.0464	763	24.2643	763	28.8506
	763.951	4.37411	763.951	0.67503	763.951	5.80996	763.951	3.92288	763.951	2.24687	763.951	16.1746	763.951	23.5735	763.951	24.5844	763.951	22.8144	763.951	24.7687	763.951	39.995	763.951	28.3179	763.951	30.4598	763.951	28.9745	763.951	32.7805
	764.902	3.72417	764.902	0.44552	764.902	5.61212	764.902	3.44769	764.902	2.28381	764.902	18.9935	764.902	24.1687	764.902	30.9857	764.902	24.0496	764.902	27.6557	764.902	44.7146	764.902	31.2963	764.902	35.3342	764.902	33.8399	764.902	36.8773
	765.854	3.06563	765.854	0.23475	765.854	5.36896	765.854	2.90091	765.854	2.2246	765.854	21.5214	765.854	24.4111	765.854	35.0455	765.854	25.297	765.854	30.218	765.854	48.9841	765.854	33.8244	765.854	40.5379	765.854	38.8388	765.854	41.2226
	766.805	2.47709	766.805	0.06049	766.805	5.00118	766.805	2.2209	766.805	2.03358	766.805	23.7304	766.805	25.0275	766.805	37.3169	766.805	26.5085	766.805	32.3675	766.805	52.0967	766.805	35.6086	766.805	45.8883	766.805	43.9083	766.805	45.4711
	767.756	1.96253	767.756	0.07997	767.756	4.41772	767.756	1.68758	767.756	1.8714	767.756	25.6332	767.756	25.6138	767.756	37.9523	767.756	27.2143	767.756	34.109	767.756	56.6122	767.756	36.6721	767.756	51.9111	767.756	49.5246	767.756	47.2153
	768.707	1.59927	768.707	0.06918	768.707	3.8356	768.707	1.15942	768.707	2.06117	768.707	26.8647	768.707	25.8371	768.707	37.0382	768.707	27.5089	768.707	35.2828	768.707	57.9171	768.707	37.1697	768.707	56.5077	768.707	51.9579	768.707	48.1147
	769.659	1.38704	769.659	0.04847	769.659	3.27816	769.659	0.7488	769.659	1.99534	769.659	27.5563	769.659	25.7315	769.659	34.8786	769.659	27.5036	769.659	35.9797	769.659	58.0695	769.659	36.5784	769.659	57.3402	769.659	52.7824	769.659	48.2134
	770.61	1.29298	770.61	0.04427	770.61	2.7352	770.61	0.40005	770.61	1.74322	770.61	27.9092	770.61	25.2626	770.61	31.5822	770.61	27.6968	770.61	35.4163	770.61	57.2621	770.61	35.7334	770.61	55.9345	770.61	52.9672	770.61	47.5971
	771.561	1.28748	771.561	0.06113	771.561	2.19975	771.561	0.06887	771.561	1.42251	771.561	27.9526	771.561	24.4799	771.561	27.6937	771.561	28.0034	771.561	33.8012	771.561	54.8769	771.561	35.1007	771.561	53.5685	771.561	52.6806	771.561	45.9376
	772.512	1.36401	772.512	0.06319	772.512	1.68032	772.512	-0.21953	772.512	1.0495	772.512	27.3674	772.512	23.5776	772.512	24.486	772.512	27.2085	772.512	33.2604	772.512	49.2946	772.512	34.0916	772.512	49.8846	772.512	50.749	772.512	42.1364
	773.463	1.55622	773.463	0.14044	773.463	1.17808	773.463	-0.34846	773.463	0.65586	773.463	26.2257	773.463	21.8286	773.463	22.4883	773.463	26.7246	773.463	31.6886	773.463	44.5825	773.463	32.2943	773.463	43.5538	773.463	46.9269	773.463	38.7669
	774.415	1.69961	774.415	0.1444	774.415	0.8525	774.415	-0.31408	774.415	0.28613	774.415	24.5105	774.415	20.1504	774.415	21.0885	774.415	25.3314	774.415	29.3222	774.415	39.9013	774.415	29.4967	774.415	37.8907	774.415	38.7504	774.415	34.8663
	775.366	1.9094	775.366	0.16152	775.366	0.54375	775.366	-0.13315	775.366	0.08194	775.366	22.4937	775.366	18.4051	775.366	20.491	775.366	23.3983	775.366	26.4259	775.366	35.4688	775.366	26.7932	775.366	32.5847	775.366	31.3411	775.366	31.087
	776.317	2.179	776.317	0.20272	776.317	0.21885	776.317	0.15451	776.317	0.05795	776.317	20.174	776.317	16.5339	776.317	20.3123	776.317	20.9871	776.317	23.3585	776.317	31.2282	776.317	24.3527	776.317	27.6881	776.317	26.0611	776.317	27.5137
	777.268	2.49049	777.268	0.221	777.268	-0.0471	777.268	0.49024	777.268	0.12183	777.268	17.4208	777.268	14.5853	777.268	19.787	777.268	17.8622	777.268	20.4713	777.268	26.9102	777.268	21.6521	777.268	23.5222	777.268	21.149	777.268	23.805
	778.219	2.89318	778.219	0.26465	778.219	-0.19615	778.219	0.7502	778.219	0.19154	778.219	15.1931	778.219	12.8761	778.219	19.1476	778.219	13.412	778.219	17.4087	778.219	22.5316	778.219	19.2502	778.219	19.6179	778.219	16.6917	778.219	20.4024
	779.171	3.3304	779.171	0.31364	779.171	-0.27176	779.171	1.03733	779.171	0.18889	779.171	13.476	779.171	11.5078	779.171	17.7867	779.171	10.6613	779.171	14.5731	779.171	18.282	779.171	17.0815	779.171	16.4207	779.171	12.677	779.171	17.7484
	780.122	3.81867	780.122	0.38278	780.122	-0.20384	780.122	1.50251	780.122	0.40133	780.122	12.0196	780.122	10.2782	780.122	16.1564	780.122	8.49324	780.122	11.99	780.122	14.2433	780.122	15.2071	780.122	13.6883	780.122	9.59292	780.122	14.9743
	781.073	4.35589	781.073	0.48195	781.073	0	781.073	2.08745	781.073	0.74004	781.073	10.5393	781.073	9.10648	781.073	14.421	781.073	6.81761	781.073	9.55118	781.073	11.0659	781.073	13.7728	781.073	11.1758	781.073	6.8153	781.073	12.7866
	782.024	4.93325	782.024	0.61174	782.024	0.31505	782.024	2.73338	782.024	1.02857	782.024	8.8582	782.024	7.82616	782.024	12.6851	782.024	5.72486	782.024	7.17757	782.024	9.08359	782.024	12.766	782.024	8.74786	782.024	3.97751	782.024	11.6791
	782.976	5.54983	782.976	0.75139	782.976	0.78455	782.976	3.62568	782.976	1.22336	782.976	7.21105	782.976	5.83731	782.976	11.1434	782.976	4.89607	782.976	5.06892	782.976	7.05373	782.976	11.6099	782.976	6.69954	782.976	2.92253	782.976	9.7566
	783.927	6.28529	783.927	0.97535	783.927	1.72615	783.927	4.24411	783.927	1.37439	783.927	5.73848	783.927	3.92967	783.927	9.79376	783.927	4.45693	783.927	3.4032	783.927	4.76822	783.927	10.3678	783.927	4.90494	783.927	1.45375	783.927	8.04924
	784.878	6.98599	784.878	1.28462	784.878	2.90668	784.878	4.64387	784.878	1.43544	784.878	4.54295	784.878	2.25923	784.878	8.50563	784.878	4.02639	784.878	2.20858	784.878	3.43305	784.878	9.11079	784.878	3.42745	784.878	0.91387	784.878	6.48813
	785.829	7.6208	785.829	1.75694	785.829	4.27969	785.829	4.95851	785.829	1.53751	785.829	3.57228	785.829	0.83918	785.829	7.29423	785.829	3.29965	785.829	1.39964	785.829	2.32762	785.829	7.82421	785.829	2.50101	785.829	0.56563	785.829	5.09978
	786.781	8.16843	786.781	2.39553	786.781	5.75747	786.781	5.36604	786.781	1.74772	786.781	2.73103	786.781	-0.42758	786.781	6.18179	786.781	2.36569	786.781	1.01645	786.781	1.08668	786.781	6.56803	786.781	2.02855	786.781	0.16308	786.781	3.87284
	787.732	8.60481	787.732	2.99514	787.732	7.1918	787.732	6.06404	787.732	2.02434	787.732	1.91129	787.732	-1.74159	787.732	5.18151	787.732	1.79109	787.732	1.27217	787.732	0.10231	787.732	5.4971	787.732	1.48821	787.732	0.24627	787.732	2.74281
	788.683	8.8674	788.683	3.72025	788.683	8.66005	788.683	6.88457	788.683	2.60163	788.683	1.53006	788.683	-2.87144	788.683	4.41077	788.683	1.23935	788.683	1.79836	788.683	-0.53254	788.683	4.37066	788.683	0.99017	788.683	0.18184	788.683	1.8923
	789.634	9.48985	789.634	4.72435	789.634	10.1359	789.634	7.60894	789.634	3.44027	789.634	1.34543	789.634	-4.0242	789.634	3.74662	789.634	0.84892	789.634	2.48566	789.634	-0.87896	789.634	3.1871	789.634	0.68968	789.634	0.12779	789.634	1.26442
	790.585	10.3365	790.585	6.24901	790.585	11.5529	790.585	8.49849	790.585	4.35537	790.585	1.42434	790.585	-4.8696	790.585	3.22627	790.585	0.39223	790.585	2.87314	790.585	-1.11155	790.585	2.12632	790.585	0.51815	790.585	0.35938	790.585	0.92412
	791.537	11.4161	791.537	8.18374	791.537	12.9207	791.537	9.54921	791.537	5.37007	791.537	1.67356	791.537	-5.36538	791.537	2.8578	791.537	-0.25415	791.537	3.03747	791.537	-1.23059	791.537	1.15502	791.537	-0.00607	791.537	0.67422	791.537	0.90148
	792.488	12.7936	792.488	10.279	792.488	14.2763	792.488	10.6383	792.488	6.55226	792.488	2.00178	792.488	-5.60735	792.488	2.6353	792.488	-1.09065	792.488	3.23884	792.488	-1.14935	792.488	0.18877	792.488	-0.49927	792.488	0.72124	792.488	1.17645
	793.439	14.4551	793.439	12.6495	793.439	15.5644	793.439	11.8251	793.439	7.67612	793.439	2.85596	793.439	-5.49765	793.439	2.60098	793.439	-1.79466	793.439	3.4571	793.439	-0.79992	793.439	-0.4632	793.439	-0.71743	793.439	0.76015	793.439	1.6179
	794.39	16.4269	794.39	15.1457	794.39	16.8672	794.39	12.9799	794.39	9.03664	794.39	3.78506	794.39	-5.41805	794.39	2.9487	794.39	-1.80353	794.39	3.63264	794.39	-0.34302	794.39	-0.6525	794.39	-0.93943	794.39	1.38731	794.39	2.20586
	795.341	18.7917	795.341	17.7593	795.341	18.1273	795.341	14.4111	795.341	10.6143	795.341	4.28679	795.341	-5.35763	795.341	3.34718	795.341	-1.69806	795.341	3.78859	795.341	0	795.341	-0.64113	795.341	-0.87639	795.341	1.75422	795.341	2.50995
	796.293	21.5448	796.293	20.4788	796.293	19.3861	796.293	16.1089	796.293	12.3137	796.293	4.49145	796.293	-5.07403	796.293	3.49869	796.293	-1.39166	796.293	3.88994	796.293	-0.3277	796.293	-0.40723	796.293	-0.59548	796.293	1.98782	796.293	2.57394
	797.244	24.5073	797.244	23.2654	797.244	20.6793	797.244	17.9909	797.244	14.1214	797.244	4.70284	797.244	-4.41231	797.244	2.94286	797.244	-0.80299	797.244	3.94027	797.244	-0.15815	797.244	-0.13162	797.244	-0.144	797.244	2.19243	797.244	3.07585
	798.195	27.242	798.195	26.0403	798.195	21.995	798.195	19.971	798.195	16.2182	798.195	5.30509	798.195	-3.45354	798.195	2.92714	798.195	-0.08212	798.195	4.03274	798.195	0.55038	798.195	-0.0518	798.195	0.61065	798.195	2.07522	798.195	3.9552
	799.146	30.0831	799.146	28.9518	799.146	23.3331	799.146	22.3016	799.146	18.2784	799.146	5.667	799.146	-2.23223	799.146	3.25023	799.146	0.73841	799.146	4.12156	799.146	1.54569	799.146	0.37121	799.146	1.35702	799.146	2.37816	799.146	4.9682
	800.098	32.919	800.098	31.9321	800.098	24.7027	800.098	24.669	800.098	20.1256	800.098	5.99404	800.098	-0.89468	800.098	3.86971	800.098	2.16236	800.098	4.26018	800.098	2.92426	800.098	0.80646	800.098	2.35108	800.098	2.65491	800.098	6.62098
	801.049	35.8812	801.049	34.9123	801.049	26.1335	801.049	26.8133	801.049	21.6719	801.049	6.91855	801.049	0.62719	801.049	4.74728	801.049	3.42704	801.049	4.44054	801.049	4.2872	801.049	1.43876	801.049	3.50131	801.049	3.32553	801.049	8.63157
	802	38.9954	802	37.871	802	27.5978	802	28.8505	802	23.1161	802	8.4425	802	2.35863	802	5.87942	802	4.69032	802	4.67368	802	5.51572	802	2.35852	802	5.1393	802	4.44305	802	10.6573
	802.951	42.1936	802.951	40.8286	802.951	29.0394	802.951	31.1099	802.951	24.7762	802.951	10.1626	802.951	4.29007	802.951	7.29029	802.951	6.43147	802.951	4.9862	802.951	6.75162	802.951	3.56947	802.951	7.74497	802.951	5.76174	802.951	12.6302
	803.902	45.348	803.902	43.8451	803.902	30.5138	803.902	33.4268	803.902	26.293	803.902	12.3798	803.902	6.46542	803.902	9.05585	803.902	8.21994	803.902	5.42781	803.902	8.42806	803.902	5.10775	803.902	10.6249	803.902	7.02782	803.902	16.9534
	804.854	48.3672	804.854	46.6508	804.854	31.9948	804.854	35.6297	804.854	27.8269	804.854	14.5776	804.854	8.56344	804.854	11.1178	804.854	10.0895	804.854	6.05989	804.854	10.3307	804.854	7.20256	804.854	14.3597	804.854	8.68275	804.854	21.672
	805.805	51.1118	805.805	49.3436	805.805	33.4988	805.805	37.7666	805.805	29.2974	805.805	16.6913	805.805	10.5683	805.805	13.4238	805.805	11.773	805.805	6.79492	805.805	12.7709	805.805	9.56745	805.805	18.8056	805.805	10.2355	805.805	26.849
	806.756	53.7121	806.756	51.8619	806.756	35.0124	806.756	39.5525	806.756	30.6363	806.756	18.7695	806.756	12.4157	806.756	15.7993	806.756	13.3377	806.756	7.61347	806.756	16.2309	806.756	12.13	806.756	23.5253	806.756	12.0547	806.756	32.1431
	807.707	56.2317	807.707	54.1658	807.707	36.5221	807.707	40.8927	807.707	31.8465	807.707	20.7898	807.707	14.0381	807.707	18.0493	807.707	14.7957	807.707	8.50378	807.707	20.828	807.707	14.8098	807.707	28.135	807.707	14.1762	807.707	37.4084
	808.659	58.4025	808.659	56.3422	808.659	38.033	808.659	42.2995	808.659	33.0782	808.659	22.4945	808.659	15.3767	808.659	20.0201	808.659	15.8251	808.659	9.44277	808.659	25.8213	808.659	17.412	808.659	32.599	808.659	15.3848	808.659	43.2138
	809.61	60.2922	809.61	58.578	809.61	39.4873	809.61	43.6687	809.61	34.2316	809.61	24.0459	809.61	16.3744	809.61	21.4606	809.61	16.7967	809.61	10.357	809.61	30.2059	809.61	20.1568	809.61	37.0753	809.61	16.4893	809.61	47.5463
	810.561	61.8721	810.561	60.7423	810.561	40.9268	810.561	45.2411	810.561	35.315	810.561	25.33	810.561	16.9995	810.561	22.4521	810.561	17.3977	810.561	11.1642	810.561	34.3047	810.561	22.904	810.561	40.0181	810.561	17.0896	810.561	51.9594
	811.512	63.2539	811.512	62.8779	811.512	42.3367	811.512	46.8074	811.512	36.3736	811.512	26.2229	811.512	17.5344	811.512	22.9988	811.512	17.0212	811.512	11.891	811.512	37.6133	811.512	25.1519	811.512	41.7475	811.512	17.3027	811.512	55.7428
	812.463	64.5039	812.463	64.9363	812.463	43.7221	812.463	48.2302	812.463	37.4692	812.463	26.741	812.463	18.0457	812.463	23.0818	812.463	16.1503	812.463	12.5521	812.463	39.8255	812.463	26.8303	812.463	42.6688	812.463	17.0226	812.463	57.9158
	813.415	65.6496	813.415	66.8067	813.415	45.0956	813.415	49.4917	813.415	38.6742	813.415	26.8926	813.415	18.4111	813.415	22.6675	813.415	15.9589	813.415	13.1426	813.415	40.8583	813.415	28.2237	813.415	42.9028	813.415	16.033	813.415	57.4268
	814.366	66.8065	814.366	68.5115	814.366	46.3585	814.366	50.8888	814.366	40.1086	814.366	25.3743	814.366	18.5718	814.366	21.6764	814.366	15.7534	814.366	13.6041	814.366	40.515	814.366	29.3148	814.366	39.8409	814.366	14.8887	814.366	52.8771
	815.317	68.0321	815.317	70.0756	815.317	47.6225	815.317	51.8165	815.317	41.4046	815.317	24.9875	815.317	18.2571	815.317	20.4421	815.317	15.3227	815.317	13.9364	815.317	36.4699	815.317	29.5582	815.317	37.2481	815.317	13.6616	815.317	49.6297
	816.268	69.3093	816.268	71.5092	816.268	48.88	816.268	52.5121	816.268	42.7176	816.268	24.7783	816.268	17.7618	816.268	18.3609	816.268	15.1552	816.268	14.0758	816.268	32.7751	816.268	29.4959	816.268	34.4382	816.268	12.3158	816.268	46.6135
	817.219	70.6175	817.219	72.7927	817.219	50.1215	817.219	53.1315	817.219	44.1741	817.219	24.5426	817.219	17.2326	817.219	16.2547	817.219	15.2152	817.219	14.0028	817.219	29.8112	817.219	28.7535	817.219	31.634	817.219	10.7017	817.219	43.7369
	818.171	71.924	818.171	73.9195	818.171	51.3621	818.171	53.802	818.171	45.7736	818.171	24.2	818.171	16.7033	818.171	14.8072	818.171	15.4175	818.171	13.7215	818.171	27.1306	818.171	27.3065	818.171	29.207	818.171	8.87944	818.171	41.1011
	819.122	73.1744	819.122	74.919	819.122	52.6741	819.122	54.6171	819.122	47.2436	819.122	23.4958	819.122	16.0246	819.122	13.4145	819.122	15.9199	819.122	13.2424	819.122	24.7281	819.122	26.4884	819.122	27.2884	819.122	7.45662	819.122	38.6578
	820.073	74.3976	820.073	75.8547	820.073	54.0215	820.073	55.5611	820.073	48.6418	820.073	22.9883	820.073	15.1487	820.073	12.239	820.073	16.2152	820.073	12.8289	820.073	23.1424	820.073	25.5001	820.073	25.866	820.073	6.06369	820.073	36.8622
	821.024	75.5837	821.024	76.6964	821.024	55.4044	821.024	56.7584	821.024	49.9141	821.024	22.9961	821.024	14.4215	821.024	11.2667	821.024	16.5828	821.024	12.0158	821.024	21.7486	821.024	24.3208	821.024	23.9397	821.024	4.80537	821.024	35.018
	821.976	76.7724	821.976	77.4783	821.976	56.959	821.976	58.0117	821.976	51.87	821.976	23.4699	821.976	13.8454	821.976	10.5487	821.976	16.9236	821.976	10.8361	821.976	20.587	821.976	22.8302	821.976	21.6431	821.976	3.78207	821.976	33.4923
	822.927	77.9637	822.927	78.2379	822.927	58.6534	822.927	59.0814	822.927	53.9283	822.927	23.9215	822.927	13.3606	822.927	10.041	822.927	17.2147	822.927	9.43358	822.927	19.565	822.927	21.1259	822.927	19.2771	822.927	3.02166	822.927	32.5943
	823.878	79.1383	823.878	79.0186	823.878	60.3345	823.878	59.8529	823.878	54.7084	823.878	23.7228	823.878	12.8842	823.878	9.69629	823.878	17.5162	823.878	8.01323	823.878	18.5223	823.878	19.4572	823.878	17.1338	823.878	2.56184	823.878	32.3214
	824.829	80.4074	824.829	79.9456	824.829	62.0142	824.829	61.3418	824.829	55.5452	824.829	23.6658	824.829	12.4374	824.829	10.1463	824.829	17.9529	824.829	6.76775	824.829	17.7918	824.829	17.8858	824.829	14.7682	824.829	3.13962	824.829	30.8991
	825.781	81.5651	825.781	80.8313	825.781	63.6215	825.781	63.0451	825.781	56.1949	825.781	23.1773	825.781	11.8119	825.781	10.7199	825.781	18.4635	825.781	5.7203	825.781	17.242	825.781	16.5721	825.781	13.3843	825.781	4.98194	825.781	29.3851
	826.732	82.6805	826.732	81.8551	826.732	65.2159	826.732	64.7103	826.732	56.8223	826.732	22.5508	826.732	11.2408	826.732	11.4066	826.732	18.7521	826.732	4.80165	826.732	16.7916	826.732	15.4285	826.732	13.1705	826.732	5.99326	826.732	28.1689
	827.683	83.8218	827.683	82.9065	827.683	66.7696	827.683	66.3197	827.683	57.3817	827.683	22.0322	827.683	10.5299	827.683	12.0018	827.683	18.8201	827.683	3.96396	827.683	16.3803	827.683	14.2099	827.683	13.2955	827.683	6.59814	827.683	27.2887
	828.634	85.0479	828.634	83.8731	828.634	68.2899	828.634	67.8483	828.634	57.7018	828.634	21.6343	828.634	9.63117	828.634	12.3726	828.634	18.7364	828.634	3.13933	828.634	15.8313	828.634	12.9731	828.634	13.1795	828.634	7.47414	828.634	26.63
	829.585	86.3964	829.585	84.7932	829.585	69.8955	829.585	69.1395	829.585	57.4667	829.585	20.9202	829.585	9.00257	829.585	12.6352	829.585	18.5371	829.585	2.22206	829.585	14.7362	829.585	12.4622	829.585	13.3516	829.585	8.47904	829.585	25.9746
	830.537	87.9071	830.537	86.0614	830.537	71.715	830.537	70.4786	830.537	58.217	830.537	20.3966	830.537	8.31281	830.537	12.8313	830.537	17.9455	830.537	1.63893	830.537	14.1626	830.537	12.1166	830.537	13.3261	830.537	9.35101	830.537	25.5263
	831.488	89.6741	831.488	87.7724	831.488	73.7362	831.488	71.7551	831.488	59.3328	831.488	20.062	831.488	8.00106	831.488	12.96	831.488	15.914	831.488	1.25799	831.488	13.5653	831.488	12.0542	831.488	13.089	831.488	10.1359	831.488	25.1049
	832.439	91.7381	832.439	90.345	832.439	75.983	832.439	73.045	832.439	60.8152	832.439	19.7796	832.439	7.78679	832.439	13.0435	832.439	14.3736	832.439	1.14415	832.439	13.2823	832.439	12.2545	832.439	12.7614	832.439	10.5887	832.439	24.7919
	833.39	94.0419	833.39	93.5599	833.39	78.5845	833.39	74.602	833.39	62.4874	833.39	19.5223	833.39	7.45838	833.39	13.0764	833.39	13.5788	833.39	1.26631	833.39	13.3064	833.39	12.6562	833.39	12.559	833.39	10.7033	833.39	24.595
	834.341	96.5048	834.341	96.9092	834.341	81.6893	834.341	76.6644	834.341	64.236	834.341	19.3123	834.341	7.05792	834.341	13.0362	834.341	12.6985	834.341	1.53577	834.341	13.4064	834.341	13.1636	834.341	12.6698	834.341	10.6502	834.341	24.4925
	835.293	99.3091	835.293	100.807	835.293	85.2267	835.293	78.7869	835.293	67.1141	835.293	18.9727	835.293	7.75666	835.293	12.9087	835.293	11.8429	835.293	1.93567	835.293	13.5341	835.293	13.6067	835.293	12.8459	835.293	10.6204	835.293	24.6411
	836.244	102.299	836.244	105.034	836.244	89.0316	836.244	81.6924	836.244	70.6051	836.244	18.798	836.244	9.54866	836.244	12.6949	836.244	11.18	836.244	2.43435	836.244	13.6528	836.244	14.259	836.244	13.2763	836.244	10.2961	836.244	24.7224
	837.195	105.394	837.195	109.949	837.195	93.0601	837.195	84.832	837.195	75.991	837.195	18.4115	837.195	10.7726	837.195	12.4093	837.195	10.7776	837.195	2.9855	837.195	13.7004	837.195	14.8501	837.195	13.8561	837.195	9.96624	837.195	25.039
	838.146	108.548	838.146	114.494	838.146	97.289	838.146	88.2323	838.146	81.2874	838.146	18.1882	838.146	11.6448	838.146	12.0762	838.146	10.6445	838.146	3.60944	838.146	13.678	838.146	15.227	838.146	14.4176	838.146	9.25881	838.146	25.2761
	839.098	111.756	839.098	118.14	839.098	101.694	839.098	91.9214	839.098	85.3878	839.098	18.2982	839.098	12.5535	839.098	11.711	839.098	10.6885	839.098	4.26017	839.098	13.608	839.098	15.3759	839.098	14.952	839.098	7.99412	839.098	25.2407
	840.049	115.067	840.049	121.604	840.049	106.253	840.049	95.7841	840.049	89.5154	840.049	18.3783	840.049	13.5859	840.049	11.3104	840.049	10.7059	840.049	4.78312	840.049	13.525	840.049	15.458	840.049	15.6994	840.049	6.47785	840.049	25.1158
	841	118.546	841	124.606	841	111.005	841	99.8688	841	92.7174	841	17.9189	841	14.5634	841	10.938	841	11.04	841	5.20405	841	13.6348	841	15.3775	841	16.0587	841	5.03183	841	25.1419
	841.951	122.115	841.951	127.74	841.951	115.912	841.951	104.249	841.951	95.8868	841.951	17.3814	841.951	15.2492	841.951	10.531	841.951	11.1684	841.951	5.5276	841.951	13.4922	841.951	15.0497	841.951	16.3731	841.951	4.33911	841.951	25.1191
	842.902	125.812	842.902	130.996	842.902	120.987	842.902	109.169	842.902	98.7926	842.902	16.78	842.902	15.6479	842.902	10.1119	842.902	11.2404	842.902	5.71176	842.902	13.1401	842.902	14.5538	842.902	16.5454	842.902	3.59883	842.902	25.0884
	843.854	129.639	843.854	134.375	843.854	126.227	843.854	114.179	843.854	101.181	843.854	16.0308	843.854	15.7709	843.854	9.68124	843.854	11.258	843.854	5.72445	843.854	12.7686	843.854	13.8851	843.854	16.5351	843.854	3.09804	843.854	24.9804
	844.805	133.58	844.805	137.903	844.805	131.621	844.805	118.735	844.805	103.216	844.805	15.0563	844.805	15.5448	844.805	9.22903	844.805	11.1784	844.805	5.552	844.805	12.5149	844.805	12.9612	844.805	16.3223	844.805	3.15631	844.805	24.6657
	845.756	137.622	845.756	141.684	845.756	137.191	845.756	123.168	845.756	106.633	845.756	13.9605	845.756	14.523	845.756	8.74687	845.756	11.0635	845.756	5.20707	845.756	12.0563	845.756	11.538	845.756	15.8303	845.756	3.62614	845.756	23.9759
	846.707	142.381	846.707	145.615	846.707	142.921	846.707	127.513	846.707	110.435	846.707	12.7501	846.707	13.9042	846.707	8.20268	846.707	10.6892	846.707	4.70108	846.707	11.532	846.707	10.3086	846.707	14.893	846.707	4.69559	846.707	23.1894
	847.659	147.349	847.659	149.84	847.659	148.767	847.659	132.376	847.659	114.773	847.659	11.7232	847.659	13.2106	847.659	7.66074	847.659	10.3243	847.659	4.13599	847.659	10.7126	847.659	8.79456	847.659	13.7266	847.659	5.82394	847.659	22.2371
	848.61	152.406	848.61	154.348	848.61	154.755	848.61	136.944	848.61	119.926	848.61	10.7492	848.61	12.6581	848.61	7.0063	848.61	9.8392	848.61	3.52631	848.61	10.0298	848.61	7.59082	848.61	11.9857	848.61	7.03511	848.61	21.2812
	849.561	157.477	849.561	159.083	849.561	160.862	849.561	141.214	849.561	125.699	849.561	9.81432	849.561	12.2114	849.561	6.2228	849.561	9.15207	849.561	2.94578	849.561	9.70241	849.561	6.8296	849.561	10.2687	849.561	8.22253	849.561	20.2751
	850.512	162.516	850.512	163.97	850.512	167.03	850.512	146.069	850.512	131.479	850.512	9.08084	850.512	11.554	850.512	5.41634	850.512	8.29815	850.512	2.51379	850.512	9.64584	850.512	6.07672	850.512	9.89471	850.512	9.10539	850.512	18.9639
	851.463	167.512	851.463	169.032	851.463	173.441	851.463	151.22	851.463	137.355	851.463	8.84802	851.463	10.921	851.463	4.71453	851.463	7.56717	851.463	2.16482	851.463	9.92653	851.463	5.37297	851.463	9.11858	851.463	9.42264	851.463	17.4498
	852.415	172.544	852.415	174.297	852.415	179.863	852.415	155.92	852.415	142.295	852.415	8.45755	852.415	10.1652	852.415	4.12377	852.415	6.86163	852.415	1.92858	852.415	10.3745	852.415	4.75674	852.415	8.22361	852.415	9.17599	852.415	15.8137
	853.366	177.73	853.366	179.72	853.366	186.383	853.366	160.522	853.366	147.539	853.366	7.97744	853.366	9.25107	853.366	3.95559	853.366	5.92182	853.366	1.65226	853.366	10.7211	853.366	4.30393	853.366	7.3079	853.366	8.87836	853.366	14.2878
	854.317	182.942	854.317	185.316	854.317	193.012	854.317	165.088	854.317	152.815	854.317	7.39735	854.317	8.38068	854.317	4.03759	854.317	4.83604	854.317	1.38428	854.317	10.9143	854.317	3.97332	854.317	6.38416	854.317	8.32629	854.317	12.8046
	855.268	187.948	855.268	191.021	855.268	199.619	855.268	169.649	855.268	157.821	855.268	6.71443	855.268	7.72499	855.268	4.17787	855.268	3.78631	855.268	1.22049	855.268	11.0334	855.268	3.71418	855.268	5.45694	855.268	7.40281	855.268	11.2909
	856.219	192.467	856.219	196.603	856.219	205.84	856.219	174.335	856.219	163.129	856.219	5.98045	856.219	7.2354	856.219	4.40746	856.219	2.91561	856.219	1.22802	856.219	11.2853	856.219	3.5399	856.219	4.56296	856.219	6.58714	856.219	9.85044
	857.171	196.819	857.171	201.567	857.171	211.554	857.171	178.921	857.171	167.395	857.171	5.47769	857.171	6.6814	857.171	4.56302	857.171	2.14149	857.171	1.67013	857.171	11.2885	857.171	3.57231	857.171	3.73081	857.171	5.36678	857.171	8.49885
	858.122	200.852	858.122	205.925	858.122	216.665	858.122	183.12	858.122	171.271	858.122	5.07109	858.122	6.54744	858.122	4.82426	858.122	1.66334	858.122	2.408	858.122	11.356	858.122	3.6863	858.122	2.97465	858.122	4.48701	858.122	7.33113
	859.073	204.549	859.073	209.74	859.073	221.274	859.073	187.19	859.073	174.668	859.073	4.74507	859.073	6.69272	859.073	5.16412	859.073	1.37737	859.073	3.44696	859.073	11.2734	859.073	3.92307	859.073	2.17686	859.073	3.70025	859.073	6.23594
	860.024	207.862	860.024	213.014	860.024	225.238	860.024	190.952	860.024	177.6	860.024	4.60906	860.024	6.93178	860.024	5.59026	860.024	1.24826	860.024	4.90002	860.024	11.1164	860.024	4.17389	860.024	1.38191	860.024	2.96311	860.024	5.2763
	860.976	210.737	860.976	215.719	860.976	228.369	860.976	194.126	860.976	180.028	860.976	4.72838	860.976	7.13988	860.976	6.14185	860.976	1.3371	860.976	6.7665	860.976	11.0703	860.976	4.29124	860.976	0.77571	860.976	2.31198	860.976	4.5381
	861.927	213.097	861.927	217.831	861.927	230.882	861.927	197.206	861.927	181.256	861.927	4.65183	861.927	7.52466	861.927	6.9207	861.927	1.95576	861.927	8.27441	861.927	10.9713	861.927	4.23154	861.927	0.75137	861.927	1.49458	861.927	3.72348
	862.878	214.835	862.878	219.322	862.878	232.45	862.878	199.205	862.878	181.486	862.878	4.85906	862.878	8.14975	862.878	7.78394	862.878	2.53019	862.878	10.3763	862.878	10.6829	862.878	4.34247	862.878	0.44216	862.878	1.45045	862.878	2.83091
	863.829	215.956	863.829	220.28	863.829	233.181	863.829	200.95	863.829	181.589	863.829	4.73484	863.829	8.91432	863.829	8.30889	863.829	2.95174	863.829	12.0111	863.829	10.2329	863.829	4.5388	863.829	-0.0304	863.829	1.69421	863.829	2.55267
	864.781	216.427	864.781	220.509	864.781	233.121	864.781	202.046	864.781	181.093	864.781	4.6313	864.781	9.49968	864.781	8.65864	864.781	3.25274	864.781	13.2499	864.781	9.58943	864.781	4.77784	864.781	-0.55619	864.781	2.18675	864.781	2.73511
	865.732	216.232	865.732	219.942	865.732	232.279	865.732	202.255	865.732	179.86	865.732	4.58905	865.732	9.9873	865.732	8.94646	865.732	3.5153	865.732	14.215	865.732	8.72566	865.732	4.96777	865.732	-1.07241	865.732	2.78263	865.732	3.3542
	866.683	215.35	866.683	218.681	866.683	230.623	866.683	201.7	866.683	178.284	866.683	4.20494	866.683	10.8373	866.683	9.13663	866.683	3.81743	866.683	14.9219	866.683	7.65799	866.683	5.00203	866.683	-1.55592	866.683	3.24318	866.683	4.25614
	867.634	213.503	867.634	216.667	867.634	228.32	867.634	200.479	867.634	176.347	867.634	3.61571	867.634	11.3288	867.634	9.22103	867.634	3.85221	867.634	15.4847	867.634	6.81053	867.634	5.23179	867.634	-1.68444	867.634	4.16626	867.634	5.23103
	868.585	211.114	868.585	214.163	868.585	225.042	868.585	198.549	868.585	174.142	868.585	3.01677	868.585	11.8252	868.585	9.13102	868.585	3.6735	868.585	15.6675	868.585	6.06181	868.585	5.38431	868.585	-1.68626	868.585	5.33629	868.585	6.44937
	869.537	208.493	869.537	211.291	869.537	221.317	869.537	196.189	869.537	171.594	869.537	2.43416	869.537	12.0256	869.537	8.81714	869.537	3.46139	869.537	15.5205	869.537	5.56966	869.537	5.95589	869.537	-1.61642	869.537	6.16067	869.537	7.60906
	870.488	205.416	870.488	208.302	870.488	217.345	870.488	193.332	870.488	168.846	870.488	1.87546	870.488	11.9556	870.488	8.33303	870.488	3.1934	870.488	14.915	870.488	5.21925	870.488	6.75854	870.488	-1.36265	870.488	6.78895	870.488	8.66451
	871.439	201.793	871.439	205.307	871.439	213.272	871.439	190.083	871.439	166.04	871.439	1.36391	871.439	11.718	871.439	7.74682	871.439	2.87027	871.439	13.9584	871.439	5.04325	871.439	7.64153	871.439	-0.82053	871.439	7.16962	871.439	9.65523
	872.39	198.078	872.39	202.052	872.39	209.292	872.39	187.046	872.39	163.179	872.39	0.95989	872.39	11.3616	872.39	7.08262	872.39	2.64607	872.39	13.2788	872.39	5.50622	872.39	8.92634	872.39	0	872.39	7.53686	872.39	10.6349
	873.341	194.587	873.341	198.665	873.341	205.374	873.341	183.769	873.341	160.513	873.341	0.48893	873.341	10.8369	873.341	6.33969	873.341	2.35844	873.341	12.453	873.341	5.99412	873.341	10.4925	873.341	1.27692	873.341	7.76609	873.341	11.5816
	874.293	191.253	874.293	195.174	874.293	201.826	874.293	179.918	874.293	157.943	874.293	0.01657	874.293	10.2712	874.293	5.71807	874.293	2.00368	874.293	11.5616	874.293	6.37183	874.293	11.9893	874.293	2.45891	874.293	7.62996	874.293	12.6715
	875.244	188.002	875.244	191.641	875.244	198.63	875.244	175.926	875.244	155.59	875.244	-0.02735	875.244	9.74124	875.244	5.08651	875.244	1.83805	875.244	10.4647	875.244	6.6603	875.244	13.5399	875.244	3.83089	875.244	7.6781	875.244	13.659
	876.195	184.881	876.195	188.163	876.195	195.764	876.195	172.029	876.195	153.547	876.195	0.14239	876.195	9.10089	876.195	4.41111	876.195	1.72068	876.195	9.30228	876.195	7.04612	876.195	15.2422	876.195	5.53612	876.195	7.93309	876.195	14.8073
	877.146	181.971	877.146	184.818	877.146	193.188	877.146	167.962	877.146	151.702	877.146	0.17361	877.146	8.21469	877.146	3.72439	877.146	1.46487	877.146	8.31597	877.146	7.61538	877.146	17.1433	877.146	7.56058	877.146	8.22697	877.146	16.5231
	878.098	179.268	878.098	181.569	878.098	190.812	878.098	162.096	878.098	149.296	878.098	0.49333	878.098	7.39402	878.098	3.08746	878.098	1.46498	878.098	7.57535	878.098	8.17055	878.098	19.2004	878.098	9.67878	878.098	8.79902	878.098	18.7781
	879.049	176.815	879.049	178.631	879.049	188.567	879.049	153.819	879.049	147.195	879.049	1.4442	879.049	6.72704	879.049	2.56158	879.049	1.69998	879.049	6.98011	879.049	8.84637	879.049	21.2663	879.049	11.9074	879.049	10.191	879.049	21.2431
	880	174.505	880	176.164	880	186.434	880	152.774	880	145.551	880	2.50655	880	6.57547	880	2.20183	880	2.17524	880	6.85305	880	9.90591	880	23.3931	880	14.4162	880	11.5817	880	24.0866
	880.951	172.544	880.951	174.121	880.951	184.355	880.951	156.236	880.951	144.039	880.951	3.61736	880.951	6.82129	880.951	2.18863	880.951	2.9999	880.951	7.39336	880.951	11.6056	880.951	25.5481	880.951	17.0351	880.951	13.3124	880.951	27.1787
	881.902	170.849	881.902	172.498	881.902	182.32	881.902	159.669	881.902	142.442	881.902	4.80785	881.902	7.30771	881.902	2.58091	881.902	4.20527	881.902	8.68473	881.902	13.7241	881.902	27.7199	881.902	19.8015	881.902	15.5549	881.902	30.4168
	882.854	169.083	882.854	171.291	882.854	180.337	882.854	159.256	882.854	140.759	882.854	6.14805	882.854	7.96851	882.854	3.52202	882.854	5.74414	882.854	10.5828	882.854	15.8066	882.854	29.8153	882.854	22.9223	882.854	18.2454	882.854	33.8004
	883.805	167.029	883.805	170.162	883.805	178.213	883.805	158.103	883.805	139.376	883.805	7.64329	883.805	9.30768	883.805	5.16609	883.805	7.61232	883.805	12.0853	883.805	18.6166	883.805	30.9429	883.805	26.3897	883.805	21.4398	883.805	37.6811
	884.756	164.417	884.756	168.406	884.756	176.009	884.756	157.023	884.756	137.731	884.756	9.26729	884.756	11.0258	884.756	7.29416	884.756	9.90653	884.756	14.1981	884.756	21.5269	884.756	32.1087	884.756	30.238	884.756	24.8241	884.756	42.5415
	885.707	161.988	885.707	166.171	885.707	173.718	885.707	155.255	885.707	135.723	885.707	10.8713	885.707	13.0764	885.707	9.85282	885.707	12.2895	885.707	16.7959	885.707	25.4554	885.707	34.5897	885.707	34.3777	885.707	28.116	885.707	47.5883
	886.659	159.274	886.659	163.455	886.659	171.365	886.659	152.846	886.659	133.382	886.659	12.8554	886.659	15.7329	886.659	12.809	886.659	14.7147	886.659	19.9258	886.659	29.7505	886.659	37.9528	886.659	38.7178	886.659	31.9001	886.659	52.8289
	887.61	155.892	887.61	160.293	887.61	168.954	887.61	149.98	887.61	130.958	887.61	15.3904	887.61	18.9841	887.61	16.2166	887.61	17.3394	887.61	23.6151	887.61	34.1889	887.61	41.7744	887.61	43.3534	887.61	36.4362	887.61	58.3417
	888.561	151.9	888.561	156.764	888.561	166.453	888.561	146.833	888.561	128.886	888.561	18.2166	888.561	22.4629	888.561	20.1935	888.561	20.4833	888.561	27.8648	888.561	39.4831	888.561	46.091	888.561	48.6173	888.561	41.3399	888.561	64.1388
	889.512	147.459	889.512	152.627	889.512	163.697	889.512	144.286	889.512	127.003	889.512	21.3123	889.512	27.1895	889.512	23.9883	889.512	24.1278	889.512	33.242	889.512	45.8245	889.512	50.4612	889.512	54.8586	889.512	46.3737	889.512	70.8009
	890.463	143.148	890.463	148.109	890.463	160.683	890.463	141.409	890.463	125.366	890.463	24.9405	890.463	32.4967	890.463	29.8046	890.463	28.1439	890.463	38.5794	890.463	52.9728	890.463	54.7037	890.463	62.0481	890.463	53.301	890.463	77.8646
	891.415	138.924	891.415	142.865	891.415	157.517	891.415	138.56	891.415	123.804	891.415	29.072	891.415	38.8183	891.415	36.0307	891.415	32.568	891.415	44.3576	891.415	60.2917	891.415	58.625	891.415	70.267	891.415	61.6981	891.415	85.1693
	892.366	134.851	892.366	138.362	892.366	154.261	892.366	135.596	892.366	122.005	892.366	33.442	892.366	45.96	892.366	43.3646	892.366	37.5179	892.366	51.2438	892.366	67.9019	892.366	62.2232	892.366	79.3868	892.366	70.2118	892.366	92.2656
	893.317	131.012	893.317	135.6	893.317	150.97	893.317	132.502	893.317	119.895	893.317	37.8585	893.317	53.6341	893.317	52.3316	893.317	42.8995	893.317	59.3836	893.317	75.8248	893.317	65.5087	893.317	89.2756	893.317	78.7234	893.317	99.0147
	894.268	127.448	894.268	133.507	894.268	147.698	894.268	129.786	894.268	117.938	894.268	42.4426	894.268	61.825	894.268	61.7295	894.268	48.2065	894.268	67.8558	894.268	83.4548	894.268	68.3855	894.268	99.9696	894.268	90.0005	894.268	106.041
	895.219	124.167	895.219	130.777	895.219	144.357	895.219	127.298	895.219	115.829	895.219	47.6415	895.219	71.4848	895.219	69.9449	895.219	53.6567	895.219	77.4654	895.219	91.3122	895.219	70.7263	895.219	110.34	895.219	101.332	895.219	112.591
	896.171	121.077	896.171	128.239	896.171	141.095	896.171	124.929	896.171	113.262	896.171	52.3368	896.171	82.1613	896.171	81.3174	896.171	58.9347	896.171	87.4965	896.171	98.8153	896.171	72.7376	896.171	120.364	896.171	113.156	896.171	118.597
	897.122	118.3	897.122	125.966	897.122	137.869	897.122	122.531	897.122	110.707	897.122	57.0624	897.122	93.4038	897.122	93.1269	897.122	63.9564	897.122	97.2955	897.122	105.765	897.122	74.3242	897.122	129.325	897.122	125.266	897.122	124.326
	898.073	115.974	898.073	124.039	898.073	134.853	898.073	120.247	898.073	108.403	898.073	61.5769	898.073	105.032	898.073	104.6	898.073	68.7526	898.073	108.714	898.073	112.097	898.073	74.9698	898.073	137.114	898.073	136.636	898.073	129.456
	899.024	114.262	899.024	122.503	899.024	132.223	899.024	118.283	899.024	106.379	899.024	65.5778	899.024	116.922	899.024	115.919	899.024	73.3177	899.024	123.025	899.024	117.9	899.024	74.4935	899.024	142.882	899.024	146.102	899.024	133.571
	899.976	113.428	899.976	121.315	899.976	129.896	899.976	116.643	899.976	104.448	899.976	69.668	899.976	128.72	899.976	127.021	899.976	77.3646	899.976	136.571	899.976	123.474	899.976	74.1548	899.976	142.675	899.976	153.106	899.976	136.777
	900.927	113.508	900.927	120.799	900.927	128.36	900.927	116.207	900.927	103.323	900.927	72.2315	900.927	139.951	900.927	135.184	900.927	80.9198	900.927	150.232	900.927	127.596	900.927	73.2335	900.927	140.369	900.927	157.62	900.927	138.123
	901.878	114.365	901.878	120.863	901.878	127.739	901.878	116.232	901.878	103.219	901.878	76.9572	901.878	149.7	901.878	138.963	901.878	83.6334	901.878	162.764	901.878	130.198	901.878	71.7957	901.878	136.866	901.878	160.14	901.878	138.873
	902.829	116.028	902.829	121.397	902.829	127.949	902.829	116.443	902.829	103.862	902.829	82.1281	902.829	157.388	902.829	139.987	902.829	85.4036	902.829	172.561	902.829	131.486	902.829	70.01	902.829	132.45	902.829	155.803	902.829	138.113
	903.781	118.394	903.781	122.451	903.781	128.977	903.781	116.945	903.781	105.281	903.781	86.5795	903.781	160.958	903.781	136.362	903.781	86.1394	903.781	179.932	903.781	131.232	903.781	68.0147	903.781	127.301	903.781	147.902	903.781	135.716
	904.732	121.34	904.732	124.167	904.732	130.875	904.732	118.053	904.732	107.537	904.732	89.1451	904.732	157.821	904.732	126.401	904.732	85.8474	904.732	184.745	904.732	129.206	904.732	65.896	904.732	121.468	904.732	142.826	904.732	132.09
	905.683	125.043	905.683	126.638	905.683	133.751	905.683	119.989	905.683	109.903	905.683	85.7963	905.683	146.489	905.683	119.287	905.683	84.8812	905.683	179.193	905.683	126.382	905.683	63.6647	905.683	114.682	905.683	136.692	905.683	127.238
	906.634	129.796	906.634	129.963	906.634	137.646	906.634	122.284	906.634	112.863	906.634	80.8669	906.634	135.582	906.634	111.273	906.634	82.4879	906.634	168.501	906.634	122.208	906.634	61.0108	906.634	107.996	906.634	129.029	906.634	121.352
	907.585	134.312	907.585	134.117	907.585	142.49	907.585	125.574	907.585	117.29	907.585	74.5682	907.585	123.268	907.585	102.911	907.585	79.2121	907.585	154.761	907.585	117.698	907.585	58.3545	907.585	100.65	907.585	120.228	907.585	114.447
	908.537	139.494	908.537	139.253	908.537	148.498	908.537	129.555	908.537	122.012	908.537	67.5032	908.537	110.304	908.537	94.258	908.537	75.3444	908.537	140.96	908.537	112.451	908.537	55.8972	908.537	92.8409	908.537	110.745	908.537	107.547
	909.488	145.996	909.488	145.374	909.488	155.571	909.488	134.308	909.488	126.551	909.488	60.3142	909.488	97.266	909.488	85.8744	909.488	71.0444	909.488	128.14	909.488	106.397	909.488	53.6721	909.488	85.1033	909.488	100.998	909.488	100.592
	910.439	153.808	910.439	152.37	910.439	163.387	910.439	140.217	910.439	131.408	910.439	53.4653	910.439	84.3801	910.439	78.361	910.439	66.4409	910.439	115.523	910.439	99.8256	910.439	51.5537	910.439	77.9833	910.439	91.2698	910.439	92.7538
	911.39	161.798	911.39	160.415	911.39	172.065	911.39	147.067	911.39	138.066	911.39	46.7901	911.39	72.4292	911.39	69.9756	911.39	62.1873	911.39	102.888	911.39	92.6624	911.39	49.2633	911.39	71.1509	911.39	81.5535	911.39	84.8397
	912.341	169.359	912.341	169.769	912.341	181.079	912.341	155.18	912.341	143.796	912.341	41.1792	912.341	61.9066	912.341	61.904	912.341	57.6373	912.341	91.5632	912.341	86.1365	912.341	46.9421	912.341	64.6607	912.341	72.0197	912.341	76.4147
	913.293	178.791	913.293	180.029	913.293	191.669	913.293	164.802	913.293	151.212	913.293	36.4142	913.293	52.7485	913.293	54.0324	913.293	53.221	913.293	82.6415	913.293	82.045	913.293	44.8764	913.293	58.5455	913.293	63.0504	913.293	68.398
	914.244	189.839	914.244	191.097	914.244	203.935	914.244	175.376	914.244	159.436	914.244	32.3745	914.244	44.831	914.244	46.2897	914.244	49.0959	914.244	75.1672	914.244	77.8998	914.244	42.8057	914.244	52.6649	914.244	54.7229	914.244	61.2451
	915.195	201.773	915.195	202.435	915.195	217.546	915.195	186.751	915.195	168.66	915.195	28.7229	915.195	38.2792	915.195	39.7467	915.195	45.1196	915.195	67.9911	915.195	72.6324	915.195	40.6444	915.195	47.1205	915.195	48.0464	915.195	54.173
	916.146	213.98	916.146	213.461	916.146	231.957	916.146	199.363	916.146	180.379	916.146	25.0291	916.146	33.3614	916.146	35.9759	916.146	40.9345	916.146	60.4135	916.146	67.4064	916.146	38.5191	916.146	42.2025	916.146	44.3251	916.146	46.2456
	917.098	227.009	917.098	227.197	917.098	246.865	917.098	213.602	917.098	192.622	917.098	21.8318	917.098	29.2129	917.098	31.2275	917.098	36.5998	917.098	53.2939	917.098	62.2407	917.098	35.8632	917.098	37.3966	917.098	39.1435	917.098	45.851
	918.049	239.715	918.049	241.009	918.049	261.523	918.049	227.771	918.049	204.817	918.049	19.4364	918.049	24.9804	918.049	26.7731	918.049	32.7666	918.049	46.2745	918.049	57.4945	918.049	33.2143	918.049	33.736	918.049	34.9054	918.049	44.0771
	919	252.143	919	254.517	919	276.283	919	241.912	919	216.919	919	17.5295	919	21.1371	919	22.7859	919	29.132	919	39.6894	919	52.7306	919	30.4686	919	31.2417	919	31.2442	919	39.8442
	919.951	264.341	919.951	267.67	919.951	290.886	919.951	255.238	919.951	229.001	919.951	15.7287	919.951	17.75	919.951	19.2411	919.951	25.8537	919.951	33.6403	919.951	48.0547	919.951	27.7563	919.951	28.8991	919.951	27.9184	919.951	35.1204
	920.902	276.372	920.902	280.417	920.902	305.107	920.902	267.745	920.902	240.759	920.902	14.0898	920.902	14.7732	920.902	16.0415	920.902	23.0583	920.902	28.1629	920.902	43.6996	920.902	25.1833	920.902	26.2977	920.902	25.4997	920.902	31.3227
	921.854	288.304	921.854	292.608	921.854	318.861	921.854	280.535	921.854	251.487	921.854	13.1356	921.854	12.1549	921.854	13.1159	921.854	20.7016	921.854	23.2854	921.854	39.866	921.854	22.7555	921.854	24.0777	921.854	25.2738	921.854	28.2362
	922.805	300.011	922.805	303.903	922.805	330.96	922.805	293.441	922.805	261.575	922.805	11.9799	922.805	10.204	922.805	11.1019	922.805	18.7415	922.805	19.3318	922.805	36.4383	922.805	20.5375	922.805	22.2812	922.805	25.6099	922.805	26.3295
	923.756	308.807	923.756	313.997	923.756	342.675	923.756	303.332	923.756	270.713	923.756	10.768	923.756	8.61019	923.756	9.44086	923.756	16.6327	923.756	16.1095	923.756	33.4041	923.756	18.2899	923.756	20.8457	923.756	25.8502	923.756	25.6112
	924.707	317.359	924.707	322.222	924.707	350.24	924.707	311.114	924.707	278.624	924.707	9.65487	924.707	7.4172	924.707	7.96127	924.707	14.6896	924.707	13.4361	924.707	30.7567	924.707	16.0058	924.707	19.7062	924.707	25.7392	924.707	24.9307
	925.659	324.313	925.659	329.607	925.659	356.893	925.659	315.18	925.659	283.769	925.659	8.49871	925.659	6.60724	925.659	6.62483	925.659	12.8995	925.659	11.1402	925.659	28.5767	925.659	13.9139	925.659	18.7202	925.659	25.4707	925.659	24.3144
	926.61	328.537	926.61	335.688	926.61	363.427	926.61	315.424	926.61	285.401	926.61	7.33669	926.61	6.11166	926.61	5.38505	926.61	11.2631	926.61	9.16761	926.61	26.836	926.61	12.1571	926.61	17.719	926.61	25.2203	926.61	23.9455
	927.561	330.759	927.561	337.548	927.561	364.84	927.561	314.643	927.561	284.557	927.561	6.54397	927.561	5.81211	927.561	4.15549	927.561	9.92178	927.561	7.62278	927.561	25.3188	927.561	10.6667	927.561	16.5551	927.561	24.9662	927.561	23.7661
	928.512	330.691	928.512	337.337	928.512	364.377	928.512	312.987	928.512	284.703	928.512	6.04826	928.512	5.29576	928.512	3.07934	928.512	9.00749	928.512	6.18995	928.512	23.5948	928.512	9.63802	928.512	15.152	928.512	25.0431	928.512	23.4485
	929.463	327.982	929.463	333.751	929.463	362.173	929.463	310.371	929.463	282.953	929.463	5.27956	929.463	4.38078	929.463	2.14739	929.463	8.48349	929.463	5.77727	929.463	22.0165	929.463	8.79011	929.463	13.8108	929.463	24.2423	929.463	23.3997
	930.415	325.163	930.415	329.233	930.415	358.726	930.415	306.701	930.415	280.262	930.415	3.41283	930.415	3.35777	930.415	1.35437	930.415	8.15214	930.415	5.21545	930.415	20.4517	930.415	8.27719	930.415	12.27	930.415	22.922	930.415	22.8991
	931.366	321.6	931.366	323.732	931.366	354.212	931.366	302.38	931.366	276.68	931.366	1.93178	931.366	2.37618	931.366	0.71368	931.366	7.94593	931.366	4.47978	931.366	18.8374	931.366	7.81396	931.366	11.0358	931.366	20.9259	931.366	22.1135
	932.317	316.337	932.317	317.416	932.317	348.733	932.317	297.629	932.317	272.121	932.317	1.74089	932.317	1.49343	932.317	0.22743	932.317	7.76929	932.317	3.81112	932.317	17.0744	932.317	7.23154	932.317	10.2342	932.317	18.3016	932.317	21.1843
	933.268	309.553	933.268	311.824	933.268	342.388	933.268	292.129	933.268	266.693	933.268	1.69268	933.268	0.69437	933.268	-0.12923	933.268	7.44695	933.268	3.29355	933.268	15.0178	933.268	6.75066	933.268	9.0622	933.268	15.6222	933.268	19.7847
	934.219	302.89	934.219	305.84	934.219	335.241	934.219	286.205	934.219	260.305	934.219	1.99504	934.219	0.28982	934.219	-0.44819	934.219	7.10914	934.219	2.97411	934.219	13.3476	934.219	6.00744	934.219	7.74269	934.219	12.8835	934.219	17.8871
	935.171	296.046	935.171	299.698	935.171	327.645	935.171	280.232	935.171	253.812	935.171	2.03164	935.171	0.20816	935.171	-0.62031	935.171	6.68301	935.171	3.02374	935.171	11.253	935.171	5.35596	935.171	6.17927	935.171	10.218	935.171	16.1624
	936.122	289.048	936.122	293.164	936.122	319.605	936.122	273.874	936.122	247.444	936.122	1.90152	936.122	0.40577	936.122	-0.74065	936.122	6.16702	936.122	3.30773	936.122	8.92645	936.122	4.57301	936.122	4.87481	936.122	7.55785	936.122	12.9147
	937.073	281.884	937.073	286.371	937.073	311.287	937.073	267.152	937.073	240.957	937.073	1.83473	937.073	0.70808	937.073	-0.79897	937.073	5.52923	937.073	3.7412	937.073	6.5883	937.073	3.62967	937.073	3.71501	937.073	5.14916	937.073	9.77886
	938.024	274.467	938.024	279.457	938.024	302.95	938.024	260.429	938.024	234.37	938.024	1.80937	938.024	0.99843	938.024	-0.76892	938.024	4.72101	938.024	4.17996	938.024	4.5031	938.024	2.60244	938.024	2.69021	938.024	3.3109	938.024	8.18791
	938.976	266.648	938.976	272.356	938.976	294.917	938.976	254.373	938.976	228.376	938.976	1.82382	938.976	1.34339	938.976	-0.6531	938.976	3.6939	938.976	4.4063	938.976	2.95874	938.976	1.62309	938.976	2.27699	938.976	2.27516	938.976	7.23978
	939.927	259.427	939.927	265.562	939.927	288.652	939.927	249.084	939.927	222.89	939.927	2.06918	939.927	1.8398	939.927	-0.31496	939.927	2.64836	939.927	5.25518	939.927	2.07286	939.927	0.81842	939.927	1.96875	939.927	1.53605	939.927	5.89124
	940.878	252.484	940.878	261.841	940.878	283.178	940.878	245.449	940.878	218.672	940.878	2.32362	940.878	2.17388	940.878	0.30256	940.878	2.11751	940.878	4.38982	940.878	1.59905	940.878	0.23665	940.878	2.44742	940.878	1.08593	940.878	5.3446
	941.829	246.157	941.829	257.382	941.829	277.787	941.829	241.844	941.829	215.472	941.829	2.69905	941.829	2.52674	941.829	1.4169	941.829	1.50478	941.829	3.46225	941.829	1.87366	941.829	-0.01221	941.829	2.8131	941.829	2.01362	941.829	5.48123
	942.781	240.829	942.781	252.161	942.781	272.45	942.781	237.753	942.781	212.361	942.781	3.21604	942.781	3.12281	942.781	3.04788	942.781	0.52478	942.781	2.95611	942.781	2.64468	942.781	0.08823	942.781	2.47052	942.781	2.96111	942.781	6.3915
	943.732	236.35	943.732	246.999	943.732	267.241	943.732	233.35	943.732	208.83	943.732	3.90582	943.732	4.12512	943.732	5.1587	943.732	-0.10379	943.732	2.87284	943.732	3.63269	943.732	0.43748	943.732	2.04264	943.732	3.26956	943.732	7.85197
	944.683	231.701	944.683	241.82	944.683	262.011	944.683	229.223	944.683	205.466	944.683	4.87366	944.683	5.54811	944.683	7.74331	944.683	-0.22255	944.683	3.21732	944.683	4.93842	944.683	0.5058	944.683	1.91331	944.683	4.42957	944.683	7.85746
	945.634	226.444	945.634	236.731	945.634	256.894	945.634	224.744	945.634	201.739	945.634	6.38996	945.634	7.11036	945.634	9.25639	945.634	-0.14932	945.634	4.07007	945.634	8.27237	945.634	0.21664	945.634	2.39883	945.634	6.97226	945.634	8.56089
	946.585	222.294	946.585	231.664	946.585	251.821	946.585	220.748	946.585	198.353	946.585	7.97132	946.585	9.4572	946.585	10.3763	946.585	0.72028	946.585	5.31881	946.585	11.0369	946.585	-0.01588	946.585	3.25495	946.585	8.51268	946.585	10.4266
	947.537	217.932	947.537	226.744	947.537	246.875	947.537	216.824	947.537	195.192	947.537	10.1406	947.537	10.0138	947.537	11.9588	947.537	1.89406	947.537	6.99557	947.537	12.1082	947.537	-0.11363	947.537	4.99617	947.537	9.58182	947.537	12.5752
	948.488	213.448	948.488	221.897	948.488	242.108	948.488	213.041	948.488	192.082	948.488	12.6337	948.488	11.1697	948.488	14.0689	948.488	3.66101	948.488	9.0841	948.488	13.5672	948.488	-0.01247	948.488	6.8489	948.488	11.1943	948.488	14.8837
	949.439	209.281	949.439	217.08	949.439	237.545	949.439	209.601	949.439	188.952	949.439	15.2054	949.439	12.906	949.439	16.7605	949.439	6.1844	949.439	11.5399	949.439	15.8716	949.439	0.36396	949.439	8.32581	949.439	13.5059	949.439	17.4041
	950.39	205.593	950.39	212.412	950.39	233.187	950.39	206.613	950.39	185.945	950.39	18.1512	950.39	14.949	950.39	20.056	950.39	9.0173	950.39	14.2769	950.39	19.0788	950.39	1.10958	950.39	10.1313	950.39	15.1321	950.39	20.0664
	951.341	202.487	951.341	208.064	951.341	229.086	951.341	203.784	951.341	183.384	951.341	22.5822	951.341	18.5304	951.341	24.1847	951.341	13.0446	951.341	16.3399	951.341	22.614	951.341	2.19496	951.341	11.3213	951.341	18.6196	951.341	23.5397
	952.293	199.709	952.293	204.444	952.293	225.096	952.293	200.973	952.293	180.849	952.293	26.7568	952.293	21.9393	952.293	28.76	952.293	16.8232	952.293	21.053	952.293	26.1933	952.293	3.28151	952.293	12.4375	952.293	22.5794	952.293	26.5818
	953.244	197.17	953.244	201.18	953.244	221.149	953.244	198.008	953.244	178.509	953.244	31.3829	953.244	26.639	953.244	33.9725	953.244	21.2078	953.244	26.2858	953.244	30.2946	953.244	4.3307	953.244	12.8352	953.244	27.047	953.244	29.858
	954.195	194.667	954.195	198.198	954.195	217.24	954.195	194.951	954.195	176.05	954.195	36.3881	954.195	32.7545	954.195	38.79	954.195	25.4001	954.195	32.3661	954.195	34.6331	954.195	5.83628	954.195	14.2853	954.195	31.4767	954.195	33.4979
	955.146	191.939	955.146	195.444	955.146	213.371	955.146	191.877	955.146	173.131	955.146	42.1513	955.146	40.0975	955.146	43.5712	955.146	29.5007	955.146	40.0188	955.146	38.8818	955.146	8.15557	955.146	17.6823	955.146	35.6581	955.146	37.4126
	956.098	188.732	956.098	192.769	956.098	209.534	956.098	188.739	956.098	169.71	956.098	49.9718	956.098	48.7727	956.098	51.116	956.098	35.6311	956.098	49.1696	956.098	43.0389	956.098	11.1349	956.098	21.3569	956.098	40.1762	956.098	41.4607
	957.049	185.063	957.049	190.323	957.049	205.839	957.049	185.064	957.049	166.932	957.049	58.4938	957.049	60.128	957.049	58.6676	957.049	42.1976	957.049	57.5976	957.049	46.4215	957.049	14.605	957.049	25.3922	957.049	44.8676	957.049	45.5095
	958	181.991	958	188.22	958	202.286	958	181.709	958	164.274	958	66.482	958	71.7929	958	67.0903	958	48.5776	958	67.3289	958	52.2769	958	17.9128	958	29.6238	958	49.8089	958	48.84
	958.951	179.121	958.951	187.388	958.951	198.903	958.951	178.043	958.951	161.959	958.951	74.4325	958.951	84.0212	958.951	75.1744	958.951	55.2018	958.951	78.4347	958.951	58.7325	958.951	21.6206	958.951	36.0784	958.951	54.9432	958.951	52.1988
	959.902	176.173	959.902	186.263	959.902	195.845	959.902	174.492	959.902	159.945	959.902	81.8694	959.902	96.2264	959.902	83.113	959.902	61.4161	959.902	90.177	959.902	66.127	959.902	25.6308	959.902	42.4994	959.902	61.9695	959.902	55.4112
	960.854	173.022	960.854	183.542	960.854	193.029	960.854	171.053	960.854	157.758	960.854	88.5949	960.854	107.736	960.854	90.6202	960.854	66.9115	960.854	101.839	960.854	73.6712	960.854	29.7476	960.854	47.3171	960.854	70.0581	960.854	58.4054
	961.805	169.769	961.805	179.421	961.805	190.016	961.805	166.762	961.805	154.639	961.805	95.0675	961.805	118.2	961.805	96.4198	961.805	72.2044	961.805	113.32	961.805	78.6673	961.805	33.9196	961.805	51.7545	961.805	74.6534	961.805	61.5164
	962.756	167.159	962.756	173.455	962.756	186.703	962.756	161.678	962.756	151.996	962.756	99.5737	962.756	127.554	962.756	102.493	962.756	75.8235	962.756	126.804	962.756	85.3014	962.756	37.9238	962.756	55.3884	962.756	77.549	962.756	63.351
	963.707	163.006	963.707	166.361	963.707	181.338	963.707	155.761	963.707	147.984	963.707	104.82	963.707	130.428	963.707	104.482	963.707	79.8603	963.707	134.211	963.707	86.2297	963.707	41.1387	963.707	58.1175	963.707	80.0225	963.707	66.1408
	964.659	158.13	964.659	160.111	964.659	174.963	964.659	149.703	964.659	143.212	964.659	107.378	964.659	124.345	964.659	104.193	964.659	81.3781	964.659	134.992	964.659	84.741	964.659	43.9963	964.659	58.6971	964.659	80.6598	964.659	66.4117
	965.61	152.44	965.61	153.855	965.61	167.837	965.61	143.455	965.61	137.75	965.61	106.957	965.61	114.911	965.61	100.181	965.61	81.0971	965.61	130.678	965.61	80.5512	965.61	46.2492	965.61	58.4766	965.61	79.5651	965.61	64.6954
	966.561	145.964	966.561	146.942	966.561	160.082	966.561	136.962	966.561	131.728	966.561	103.995	966.561	105.826	966.561	91.1373	966.561	78.8989	966.561	123.606	966.561	72.8725	966.561	47.4279	966.561	58.3248	966.561	77.7714	966.561	62.1752
	967.512	139.013	967.512	139.84	967.512	151.809	967.512	130.343	967.512	125.459	967.512	98.5088	967.512	95.5668	967.512	77.7769	967.512	73.2256	967.512	115.246	967.512	62.0899	967.512	47.1881	967.512	57.579	967.512	76.4371	967.512	59.4788
	968.463	130.694	968.463	132.431	968.463	142.746	968.463	123.218	968.463	118.924	968.463	87.5723	968.463	83.8682	968.463	68.4473	968.463	69.5936	968.463	98.4409	968.463	55.278	968.463	46.6129	968.463	55.2716	968.463	72.5916	968.463	57.4383
	969.415	121.094	969.415	125.012	969.415	133.722	969.415	116.017	969.415	112.309	969.415	77.8099	969.415	73.5691	969.415	60.6102	969.415	64.6009	969.415	85.5528	969.415	48.03	969.415	46.2031	969.415	53.3981	969.415	68.1856	969.415	54.9986
	970.366	112.934	970.366	117.557	970.366	125.149	970.366	108.646	970.366	105.664	970.366	69.8285	970.366	67.504	970.366	54.3906	970.366	59.9148	970.366	76.0285	970.366	42.2752	970.366	45.3585	970.366	51.4405	970.366	65.3233	970.366	52.8261
	971.317	105.857	971.317	110.15	971.317	117.198	971.317	101.909	971.317	98.8953	971.317	63.6126	971.317	64.3263	971.317	50.9407	971.317	55.6947	971.317	66.8719	971.317	39.3949	971.317	44.0402	971.317	49.1952	971.317	62.9768	971.317	50.7104
	972.268	99.5382	972.268	102.869	972.268	109.777	972.268	96.0403	972.268	92.1813	972.268	58.5908	972.268	63.5934	972.268	51.0654	972.268	52.3562	972.268	59.4785	972.268	39.7489	972.268	42.3691	972.268	46.6538	972.268	60.4511	972.268	48.82
	973.219	94.3262	973.219	95.7676	973.219	102.63	973.219	90.489	973.219	85.9378	973.219	54.11	973.219	66.2007	973.219	54.1432	973.219	50.6042	973.219	58.6552	973.219	42.0835	973.219	40.4795	973.219	43.917	973.219	58.1049	973.219	47.8905
	974.171	90.4243	974.171	88.9834	974.171	95.8621	974.171	84.9328	974.171	80.1591	974.171	51.6742	974.171	69.3812	974.171	54.3717	974.171	49.5256	974.171	58.1389	974.171	41.082	974.171	38.3009	974.171	40.8242	974.171	56.1564	974.171	48.7073
	975.122	82.5047	975.122	83.7206	975.122	89.4373	975.122	80.0369	975.122	74.8629	975.122	48.8037	975.122	72.205	975.122	57.1189	975.122	49.4482	975.122	60.7717	975.122	43.1855	975.122	35.7713	975.122	37.3433	975.122	54.7891	975.122	50.0732
	976.073	76.2449	976.073	78.9568	976.073	83.3604	976.073	75.9277	976.073	70.4766	976.073	49.6741	976.073	73.6774	976.073	59.1241	976.073	51.4238	976.073	64.0584	976.073	45.8163	976.073	32.9839	976.073	34.3593	976.073	56.4111	976.073	51.6637
	977.024	71.0795	977.024	74.1418	977.024	77.6032	977.024	72.0764	977.024	66.8235	977.024	50.1808	977.024	73.9264	977.024	59.1392	977.024	53.0127	977.024	66.4972	977.024	48.6016	977.024	30.2767	977.024	31.6356	977.024	56.564	977.024	51.7599
	977.976	66.2009	977.976	69.1771	977.976	72.1389	977.976	68.1233	977.976	63.3198	977.976	47.8082	977.976	72.7277	977.976	56.6852	977.976	53.4018	977.976	67.3099	977.976	51.0817	977.976	27.663	977.976	29.0558	977.976	54.2669	977.976	49.8512
	978.927	61.4617	978.927	64.2816	978.927	66.9513	978.927	64.0367	978.927	59.4246	978.927	43.3194	978.927	69.0955	978.927	52.1085	978.927	53.5455	978.927	66.3333	978.927	52.8656	978.927	24.9422	978.927	26.751	978.927	51.9147	978.927	46.9098
	979.878	56.8875	979.878	59.4687	979.878	62.0272	979.878	60.0361	979.878	55.8286	979.878	40.1498	979.878	60.4826	979.878	47.2737	979.878	53.4547	979.878	63.3731	979.878	55.2106	979.878	22.4226	979.878	24.8185	979.878	48.7746	979.878	44.7478
	980.829	52.378	980.829	54.827	980.829	57.4942	980.829	56.3115	980.829	52.1556	980.829	37.8227	980.829	52.0773	980.829	40.6035	980.829	52.2254	980.829	59.9171	980.829	55.4287	980.829	20.3669	980.829	23.1155	980.829	45.2537	980.829	38.6487
	981.781	48.0076	981.781	50.3208	981.781	53.1699	981.781	52.9031	981.781	48.5253	981.781	35.6205	981.781	44.2083	981.781	33.5103	981.781	51.0418	981.781	54.7895	981.781	56.0404	981.781	18.5412	981.781	21.6043	981.781	40.8553	981.781	33.2972
	982.732	43.7602	982.732	46.1982	982.732	49.0718	982.732	49.6422	982.732	45.0449	982.732	33.5218	982.732	36.4867	982.732	27.9564	982.732	48.3253	982.732	49.2353	982.732	55.5639	982.732	16.9726	982.732	20.2403	982.732	36.5833	982.732	28.159
	983.683	39.6371	983.683	42.481	983.683	45.187	983.683	46.6009	983.683	41.6601	983.683	31.4538	983.683	28.3498	983.683	23.6321	983.683	44.6805	983.683	43.8266	983.683	51.9077	983.683	15.7579	983.683	19.0203	983.683	32.6144	983.683	23.3506
	984.634	35.6598	984.634	39.0438	984.634	41.4764	984.634	43.8278	984.634	38.2861	984.634	29.2946	984.634	19.9466	984.634	19.2686	984.634	41.7934	984.634	38.6445	984.634	44.3423	984.634	14.928	984.634	17.8733	984.634	28.5511	984.634	19.4584
	985.585	31.857	985.585	35.8717	985.585	37.9175	985.585	40.7311	985.585	35.095	985.585	26.9895	985.585	13.7592	985.585	15.7796	985.585	39.4135	985.585	34.3548	985.585	36.5292	985.585	14.2173	985.585	16.4182	985.585	24.4044	985.585	16.1286
	986.537	28.1859	986.537	32.7984	986.537	34.3234	986.537	37.5031	986.537	31.8696	986.537	24.6359	986.537	8.74323	986.537	12.536	986.537	37.0162	986.537	29.0379	986.537	25.3058	986.537	13.9558	986.537	15.0159	986.537	20.8833	986.537	18.6035
	987.488	24.6183	987.488	29.9711	987.488	30.6991	987.488	33.8114	987.488	28.448	987.488	21.7117	987.488	6.25289	987.488	9.56831	987.488	34.5926	987.488	24.8661	987.488	15.7923	987.488	13.363	987.488	14.0172	987.488	17.626	987.488	17.5859
	988.439	21.1764	988.439	27.0053	988.439	27.127	988.439	30.1413	988.439	25.1266	988.439	19.2312	988.439	4.76615	988.439	6.7519	988.439	32.169	988.439	21.3861	988.439	15.5164	988.439	12.7092	988.439	12.9403	988.439	14.5954	988.439	15.8706
	989.39	17.8191	989.39	23.9143	989.39	23.5672	989.39	26.642	989.39	21.9653	989.39	17.1189	989.39	3.77107	989.39	4.13175	989.39	29.7985	989.39	17.7741	989.39	19.1971	989.39	12.0219	989.39	11.767	989.39	11.6383	989.39	14.1442
	990.341	14.4991	990.341	20.8541	990.341	19.9835	990.341	23.2232	990.341	18.859	990.341	14.9976	990.341	3.23965	990.341	1.83534	990.341	27.4348	990.341	14.1593	990.341	18.5479	990.341	11.2402	990.341	10.6216	990.341	8.27673	990.341	12.0363
	991.293	11.2336	991.293	17.7885	991.293	16.4914	991.293	19.7383	991.293	15.6722	991.293	13.1946	991.293	2.83503	991.293	0	991.293	24.8109	991.293	12.8732	991.293	14.1477	991.293	10.4396	991.293	9.34971	991.293	3.57507	991.293	9.91546
	992.244	8.19956	992.244	14.9418	992.244	13.2236	992.244	16.1799	992.244	12.9636	992.244	10.9744	992.244	2.61761	992.244	2.63507	992.244	22.2677	992.244	12.7553	992.244	9.43728	992.244	9.02523	992.244	8.24609	992.244	1.27177	992.244	4.25006
	993.195	5.41103	993.195	12.3396	993.195	10.1703	993.195	12.624	993.195	10.6909	993.195	9.44199	993.195	2.83951	993.195	4.0549	993.195	19.4762	993.195	12.0654	993.195	7.62617	993.195	6.37745	993.195	6.38046	993.195	-0.23032	993.195	3.49808
	994.146	3.33404	994.146	9.96342	994.146	7.36097	994.146	9.52186	994.146	8.47956	994.146	8.22814	994.146	2.99251	994.146	5.38663	994.146	16.375	994.146	12.0102	994.146	5.31087	994.146	4.68179	994.146	4.9567	994.146	-0.99571	994.146	3.48283
	995.098	2.05939	995.098	7.80618	995.098	4.82598	995.098	6.70453	995.098	6.38801	995.098	7.13611	995.098	3.42858	995.098	6.66249	995.098	13.6285	995.098	12.4692	995.098	3.70748	995.098	3.97281	995.098	3.83553	995.098	-0.56156	995.098	3.39593
	996.049	1.40247	996.049	5.8887	996.049	2.57678	996.049	4.05683	996.049	4.61225	996.049	5.95975	996.049	4.40238	996.049	7.54183	996.049	11.5471	996.049	12.7659	996.049	3.38169	996.049	3.60709	996.049	2.73764	996.049	0.73633	996.049	3.34115
	997	1.00861	997	4.25836	997	0.60045	997	1.89973	997	3.25807	997	4.47132	997	5.40661	997	7.83818	997	9.51309	997	12.2833	997	1.44563	997	3.24968	997	1.87175	997	1.25734	997	2.87481
	997.951	0.71778	997.951	2.89708	997.951	-0.99801	997.951	0.4145	997.951	2.06615	997.951	3.60719	997.951	4.47638	997.951	7.94051	997.951	7.57438	997.951	11.2838	997.951	-1.32236	997.951	2.81562	997.951	-0.16682	997.951	1.84695	997.951	2.69141
	998.902	0.50043	998.902	1.71369	998.902	-2.29566	998.902	-0.75097	998.902	0.98902	998.902	2.60576	998.902	3.04549	998.902	7.13082	998.902	5.1416	998.902	9.63762	998.902	-0.41591	998.902	2.25959	998.902	-0.41821	998.902	2.40515	998.902	2.06921
	999.854	0.27328	999.854	0.7491	999.854	-3.25779	999.854	-1.53607	999.854	0.02019	999.854	1.37512	999.854	0.2636	999.854	5.21687	999.854	2.71226	999.854	7.53261	999.854	0.15306	999.854	1.25618	999.854	-0.13561	999.854	2.85659	999.854	1.44173
	1000.8	0	1000.8	0	1000.8	-3.91506	1000.8	-1.96489	1000.8	-0.87783	1000.8	0	1000.8	-3.41588	1000.8	1.99922	1000.8	0	1000.8	4.45382	1000.8	0	1000.8	0	1000.8	0	1000.8	4.24154	1000.8	0
