# Supplementary material for: Vesuvianite: a new mineral species of (U–Th)/He geochronology
Source: Royal Society of Chemistry journal article supplement (doi:10.1039/d4ja00127c), 2024-01-01
Supplement: d4ja00127c5.xlsx [file d4ja00127c5.xlsx]

## Sheet: Table S4
	Supplementary Table 4: FWHM and peak position differences of six peaks between three samples and the reference spectrum ( Bufa, M1439, M784)
		Full width at half maximum(FWHM)																		Peak position Shift
	peak(cm-1)	370			410			638			690			890			900			370			410			638			690			890			900
	Sample	Bufa	M1439	M784	Bufa	M1439	M784	Bufa	M1439	M784	Bufa	M1439	M784	Bufa	M1439	M784	Bufa	M1439	M784	Bufa	M1439	M784	Bufa	M1439	M784	Bufa	M1439	M784	Bufa	M1439	M784	Bufa	M1439	M784	Bufa	M1439	M784
	Sample age(Ma)	40	165	223	40	165	223	40	165	223	40	165	223	40	165	223	40	165	223	40	165	223	40	165	223	40	165	223	40	165	223	40	165	223	40	165	223
	Difference	-5.52016	-19.4571	-13.9819	-3.8634	13.6442	19.303	-12.1898	-18.4508	-2.10645	-0.94056	2.47272	1.32684	8.41436	-3.7053	-2.80947	4.07169	-24.7278	-14.0803	-1.59023	3.99829	-6.74339	5.95587	0.75874	-8.90878	1.04908	3.88576	-4.23018	5.06186	5.72634	3.1006	1.53326	3.44501	10.0094	11.7992	7.92413	6.84996
		2.43837	-9.91494	21.3906	-0.82151	2.52101	19.7937	-8.2094	-23.4596	-10.8847	4.81116	-7.77343	1.8757	12.1157	-18.6222	22.0695	4.3836	-19.3804	-5.96255	-2.36177	4.10519	-3.52089	9.87204	6.13055	-8.43137	0.84031	-0.66542	-3.15601	6.35986	8.83152	3.57801	5.47541	2.52344	10.0094		18.421	4.70162
		-12.3753	-26.1376	16.9195	13.8337	1.8137	17.3965	-14.9645	-17.7249	-7.87907	4.55241	3.53887	2.67872	10.2298	1.1494	15.1331	-14.0936	-22.6895	-5.62087	-1.84996	2.44672	-5.19182	0.75874	6.72634	-6.28303	3.289	4.95993	-2.08184	2.50384	5.72634	4.17477	2.9676	4.04177	10.0094	6.37255	5.77579	6.84996
		-12.0751	-6.91465	-1.72306	-19.9198	29.153	19.7132	-19.9489	-5.46994	3.12525	-7.31395	6.99641	1.66929	-8.56162	7.26657	21.8785	4.93755	-20.224	-1.69429	-0.68022	0.29838	-6.26598	0	0.75874	-6.76044	3.31889	1.61807	-1.60443	3.01057	7.87468	4.17477	4.28769	7.26428	8.33845	10.0355	7.44672	6.84996
		-15.4635	-25.1065	13.4354	-11.4806	1.30228	18.5244	-20.7831	-17.496	-6.6187	-10.5869	4.24864	2.54827	-10.7337	1.4191	6.82115	0.87228	-16.1804	-15.3133	-0.81844	3.52089	2.44672	1.958	7.3231	-7.83461	2.93555	3.289	-3.15601	3.26665	5.72634	3.57801	5.81853	7.26428	9.41262	10.4152	6.84996	5.77579
		-5.55979	-23.3235	19.5126	10.9588	8.46456	20.4745	-19.534	-19.7637	-10.7566	4.32824	3.24487	3.69595	6.02306	5.7892	-1.32083	-12.6622	-16.932	-12.736	-1.37255	3.52089	-2.44672	0.75874	1.3555	-7.3572	3.88576	4.95993	-5.90111	5.24893	6.80051	3.57801	5.11594	6.78687	6.19011	9.11765	6.37255	4.22421
		-5.55979	-28.6396	-8.01659	10.9588	5.19664	-1.97926	-19.534	-16.7686	-17.1522	4.32824	1.59958	4.4299	6.02306	-10.2567	4.71315	-12.6622	-24.2995	-12.0319	-1.37255	0.29838	-6.26598	0.75874	5.17477	-7.3572	3.88576	3.289	-4.23018	5.24893	6.80051	3.1006	5.11594	4.04177	6.19011	9.11765	10.6692	5.29838
		-12.9456	-28.4432	-8.69503	11.9423	5.27031	41.4729	-19.37	-13.9148	-14.4947	5.73353	2.04817	4.95776	3.11358	-9.55909	4.25585	-1.82875	-17.0072	-7.42443	-0.77579	0.77579	-3.04348	0.75874	6.24893	-4.61211	3.289	3.289	-1.00767	4.65217	7.39727	4.65217	3.44501	4.04177	4.51918	8.52089	10.6692	5.77579
		0.18436	-28.9001	-7.84904	13.4788	5.0544	44.7093	-18.8574	-8.98898	-17.0617	4.75864	2.64302	4.38306	5.48408	-0.00292	8.66798	-14.6019	-13.3732	-17.9166	-1.84996	-0.29838	-2.44672	1.3555	5.65217	-7.83461	3.88576	1.61807	-0.53026	5.24893	6.3231	4.65217	2.9676	5.11594	4.51918	9.59506	9.11765	5.29838
		-6.11364	-26.8574	-11.9438	11.6586	5.4926	0.33635	-18.3895	-16.7776	-17.069	4.80964	2.63112	2.54295	10.3407	-13.8119	9.69134	-12.8994	-21.0119	-10.9638	-2.44672	0.29838	-3.04348	-0.31543	5.65217	-6.76044	4.36317	3.289	-0.53026	5.24893	6.80051	3.57801	6.19011	4.04177	3.44501	10.1918	10.6692	5.29838
		-6.11364	-15.2548	-11.131	11.6586	12.0027	39.125	-18.3895	-13.0468	-17.0409	4.80964	2.84852	4.36254	10.3407	-12.6732	9.24126	-12.8994	-19.8564	-14.258	-0.92383	1.37255	-5.19182	-1.08936	3.50384	1.3555	2.3073	3.289	-0.53026	3.53875	5.72634	3.57801	3.07156	2.37084	3.44501	7.05345	10.6692	5.29838
		-6.69063	-26.7726	5.83007	19.7678	5.80733	25.4375	-10.5199	-18.9857	-15.7973	10.3439	3.02176	3.758	13.9637	-10.3641	0.82499	-16.636	-22.0421	-11.0719	-1.84996	1.84996	-0.77579	0.28133	6.72634	-6.76044	2.81159	3.289	-0.53026	3.57801	5.72634	4.65217	4.51918	2.37084	4.04177	8.52089	10.6692	5.77579
		-9.46701	-27.4185	-3.67002	16.123	4.03056	19.9534	-15.5167	-18.32	-17.1255	5.80758	4.67402	8.22648	7.8164	-10.8876	9.59977	-14.5753	-21.845	-10.3404	-2.44672	1.84996	-5.19182	0.28133	6.24893	-6.76044	3.289	3.88576	-0.53026	3.1006	7.87468	4.17477	2.37084	3.44501	5.11594	6.37255	9.11765	6.37255
		-8.70207	-26.3598	-4.643	15.9872	3.65923	19.1997	-18.3079	-19.6408	-15.9408	7.42144	1.22665	4.51053	2.09818	-3.1778	5.75784	-9.2679	-20.4212	-11.1573	-1.37255	1.84996	-5.66922	0.28133	6.24893	-7.3572	3.88576	4.36317	-1.00767	3.1006	6.80051	3.57801	1.89344	1.29668	5.11594	4.70162	10.1918	4.22421
		-12.3753	--	-6.77115	13.8337	--	17.1522	-14.9645	--	-17.3971	4.55241	--	4.83722	10.2298		6.37301	-14.0936	--	-14.0877	-1.84996	--	-5.19182	0.75874		-7.3572	3.289		-0.53026	2.50384		3.57801	2.9676		4.51918	6.37255		4.70162
																						-4.11765			-6.76044			-1.00767			4.17477			6.19011			4.70162
