# Supplementary material for: Vesuvianite: a new mineral species of (U–Th)/He geochronology
Source: Royal Society of Chemistry journal article supplement (doi:10.1039/d4ja00127c), 2024-01-01
Supplement: d4ja00127c6.xlsx [file d4ja00127c6.xlsx]

## Sheet: Table S5
	Supplementary Table 5 Comparison of U, Th, Sm concentrations obtained from LA-ICP-MS experiment with previous results
		Sm147(μg/g)	2SE	Th232(μg/g)	2SE	Th232-(U-Th)/He	2SE	Th-Wei22	2SE	U238(μg/g)	2SE	U238-(U-Th)/He	2SE	U-Wei22	2SE	eU	Th/U-Wei22	207Pb corr. Ma-Wei42	1SE-Wei22
	M1439-L1	23	10	0.93	0.23	27.0019	1.3501	1.36	0.068	63.3	4.4	84.5315	4.22657	26.7	1.335	63.5185	0.05	154.7	5.3
	M1439-L2	23.2	7.9	1.92	0.68	20.9165	1.04582	1.72	0.086	62.3	4.2	35.4635	1.77317	27.7	1.385	62.7512	0.06	160.3	5.2
	M1439-L3	21	14	6.3	1.1	9.44577	0.472289	21.3	1.065	55.4	3.5	38.5418	1.92709	29	1.45	56.8805	0.74	160.7	5.6
	M1439-L4	25	12	6.82	0.71	14.2512	0.71256	0.3	0.015	56.8	6	30.7605	1.53803	44.4	2.22	58.4027
	M1439-L5	19.1	7.1	4.19	0.37	6.52317	0.326159	11	0.55	53.2	4.6	24.4822	1.22411	21.7	1.085	54.1847
	M1439-L6	31.9	8.7	4.67	0.89	5.2704	0.26352	3.83	0.1915	56.3	7.3	16.2995	0.814977	28.1	1.405	57.3974
	M1439-L7	20	12	4.62	0.63			28.5	1.425	63.4	6.8			63.3	3.165	64.4857
	M1439-L8	30.4	9.5	6.66	0.73			4.28	0.214	68.9	5.8			18.5	0.925	70.4651
	M6608-L1	1.5	1.3	0.051	0.051	0.248974	0.0124487	0.04	0.002	0.77	0.18	6.88909	0.344455	24	1.2	0.781985	0	87	2.9
	M6608-L2	0.82	0.95	0.04	0.046	0.112054	0.00560269	0.05	0.0025	0.9	0.21	15.4582	0.772911	9.5	0.475	0.9094	0.01	89.2	3.7
	M6608-L3	2.4	1.7	0.066	0.066	0.159358	0.00796792	0.4	0.02	0.84	0.17	8.29217	0.414608	25.7	1.285	0.85551	0.0155642	95.6	8.4
	M6608-L4	4.2	2.2	0.026	0.037			0.1	0.005	1.29	0.24			0.5	0.025	1.29611
	M6608-L5	4.3	2.3	0.48	0.2			0.03	0.0015	1.09	0.2			23.8	1.19	1.2028
	M6608-L6	5.3	2.7	0.19	0.12			0.02	0.001	2.19	0.39			2.9	0.145	2.23465
	M6608-L7	2.3	1.8							1.54	0.3			5.3	0.265	1.54
	M6608-L8	1.7	1.5							1.04	0.26			17.7	0.885	1.04
	M6608-L9	2.1	1.6							0.8	0.21			23.2	1.16	0.8
	M1377-L1	134	57	196	23	174.132	8.70661	49.6	3.445	317	40	98.4629	4.92314	77.6	3.88	363.06	0.64	223.7	6.6
	M1377-L2	95	22	179	21	226.982	11.3491	53.7	3.065	296	31	96.4356	4.82178	58.7	2.935	338.065	0.91	224.7	7
	M1377-L3	83	13	198	15	79.9315	3.99658	44.9	1.695	299	26	153.682	7.68409	54.3	2.715	345.53	0.83	225.4	8.8
	M1377-L4	78	27	165	13	180.111	9.00554	46.1	2.065	250	19	91.7201	4.586	52	2.6	288.775
	M1377-L5	87	27	193	13	305.677	15.2839	62	3.72	264	18	113.803	5.69014	83.4	4.17	309.355
	M1377-L6	99	23	201	16	77.0888	3.85444	68.9	2.48	261	20	112.679	5.63394	74.6	3.73	308.235
	M1377-L7	95	19	247	15			61.3	2.685	274	17			53.3	2.665	332.045
	M1377-L8	79	17	240	18			33.9	2.245	249	20			53.8	2.69	305.4
	M1377-L9	78	19	211	13			41.3	2.305	283	17			85.6	4.28	332.585
	M1377-L10	81	18	210	15			74.4	3.1	262	19			80.7	4.035
	Bufa-L1	10.2	7.9	0.36	0.1	0.997158	0.0498579	0.26	0.013	36.5	3.8	11.2258	0.561289	23.7	1.185	36.5846	0.01	30.4	2.1
	Bufa-L2	8.1	6.8	0.34	0.1	0.284473	0.0142236	0.26	0.0115	31.6	2.7	3.53858	0.176929	24	1.2	31.6799	0.01	31.6	2.3
	Bufa-L3	12.2	8.3	0.352	0.081	0.180039	0.00900193	0.23	0.024	32.8	2.3	89.0517	4.45258	19.5	0.975	32.8827	0.01	30.4	2.8
	Bufa-L4	2.9	3.3	0.44	0.14	0.145535	0.00727673	0.48	0.0245	33.8	3.7	17.3812	0.86906	22.4	1.12	33.9034
	Bufa-L5	5.4	6.4	0.34	0.11	0.105052	0.0052526	0.49	0.013	34.3	4.3	0.801703	0.0400851	33.7	1.685	34.3799
	Bufa-L6	2.2	3	0.324	0.084	1.14854	0.0574269	0.26	0.016	41.1	5	6.1669	0.308345	18.3	0.915	41.1761
	Bufa-L7	8.6	5.4	0.379	0.095	0.150826	0.00754132	0.32	0.011	37.1	4.4	57.0445	2.85222	22.6	1.13	37.1891
	Bufa-L8	4.8	4.4	0.321	0.076	0.109046	0.00545228	0.22	0.013	37.5	3.4	4.77422	0.238711	17.6	0.88	37.5754
	Bufa-L9	7.7	5.6	0.32	0.14			0.26	0	37.5	4	1.20607	0.0603035	10.8	0.54	37.5752
	M784-L1	94	24	1890	160	769.444	38.4722	56	6.2	248	22	93.6287	4.68143	185	9.25	692.15	0.3	227.8	6.6
	M784-L2	92	33	2030	190	1010.11	50.5057	75	1.3	261	25	129.776	6.48882	65	3.25	738.05	1.16	223.5	7.3
	M784-L3	75	25	1890	140	621.064	31.0532	161	4.3	234	16	103.819	5.19097	72	3.6	678.15	2.24	224.4	7.4
	M784-L4	98	30	1810	140	617.635	30.8817	112	10.45	232	21	81.603	4.08015	32	1.6	657.35
	M784-L5	64	23	1940	300	780.382	39.0191	169	2.8	235	37	105.228	5.26141	161	8.05	690.9
	M784-L6	93	35	1960	140	425.092	21.2546	260	3.75	237	21	55.5232	2.77616	79	3.95	697.6
	M784-L7	92	28	1720	200			124	8.05	245	27			72	3.6	649.2
	M784-L8	151	46	1870	260			26	5.6	273	38			56	2.8	712.45
	M784-L9	123	38	1820	170			86	8.45	255	22			60	3	682.7
	M784-L10	107	27	1850	220			209	13	263	29			28	1.4
	Wilui-L1	7.7	7.4	0.4	0.13	0.320842	0.0160421	0.05	0.0025	8.9	1	3.31695	0.165848	3.4	0.17	8.994	0.02	254.4	8
	Wilui-L2	2.7	5.4	0.83	0.25	0.43971	0.0219855	0.03	0.0015	10.5	2.2	4.54287	0.227144	8.93	0.4465	10.6951	0	255.8	6.1
	Wilui-L3	3.7	5.1	1.04	0.27	0.116688	0.0058344	0.12	0.006	9.9	1.2	4.53842	0.226921	9.5	0.475	10.1444	0.01	254.5	6
	Wilui-L4	9	8.6	0.87	0.23	1.61353	0.0806766	0.13	0.0065	10.3	1	3.80644	0.190322	8.6	0.43	10.5045
	Wilui-L5	2.6	5.2	0.76	0.17	1.11369	0.0556846	3.52	0.176	10.2	0.88	5.77582	0.288791	12.1	0.605	10.3786
	Wilui-L6	5	10	0.96	0.33			3.76	0.188	9.5	2			13.7	0.685	9.7256
	Wilui-L7	13	13	1.01	0.18			0.04	0.002	8.51	0.75			6.9	0.345	8.74735
	Wilui-L8	9.4	8.8	1.08	0.2			0.3	0.015	9.6	1.3			7.5	0.375	9.8538
	Wilui-L9	2.3	4.5	2.13	0.28			0.13	0.0065	8.69	0.8			18.5	0.925	9.19055
	Wilui-L10	6.8	7.4	3.16	0.47			0.16	0.008	8.9	1.1			8.5	0.425	9.6426
	Wilui-L11	8.6	9.3	2.36	0.28			0.02	0.001	8.7	0.75			4.8	0.24	9.2546
	Wilui-L12	10.4	9.7	2.23	0.4			0.25	0.0125	10	1.3			4	0.2	10.5241
	M6635-L1	155	51	316	38	178.672	8.93362	266	13.3	378	46	168.657	8.43283	303	15.15	452.26	0.88	231.8	4.3
	M6635-L2	141	54	322	31	148.477	7.42383	204	10.2	373	32	145.482	7.27411	258	12.9	448.67	0.79	229.3	4.6
	M6635-L3	156	30	308	42	40.0421	2.0021	191	9.55	381	47	43.9239	2.1962	270	13.5	453.38	0.71	229	4.3
	M6635-L4	167	52	280	20	147.926	7.3963	225	11.25	373	29	160.773	8.03864	271	13.55	438.8
	M6635-L5	156	42	295	27	101.98	5.09901	408	20.4	401	31	218.025	10.9012	235	11.75	470.325
	M6635-L6	165	53	272	29	66.4495	3.32247	177	8.85	393	40	131.942	6.5971	233	11.65	456.92
	M6635-L7	160	46	286	29	159.933	7.99666	195	9.75	365	38	151.518	7.5759	236	11.8	432.21
						123.263	6.16314	389	19.45			86.4946	4.32473	238	11.9
						218.431	10.9215	347	17.35			251.979	12.5989	230	11.5
