# Supplementary figures and images for: Vesuvianite: a new mineral species of (U–Th)/He geochronology
Source: Royal Society of Chemistry journal article supplement (doi:10.1039/d4ja00127c), 2024-01-01

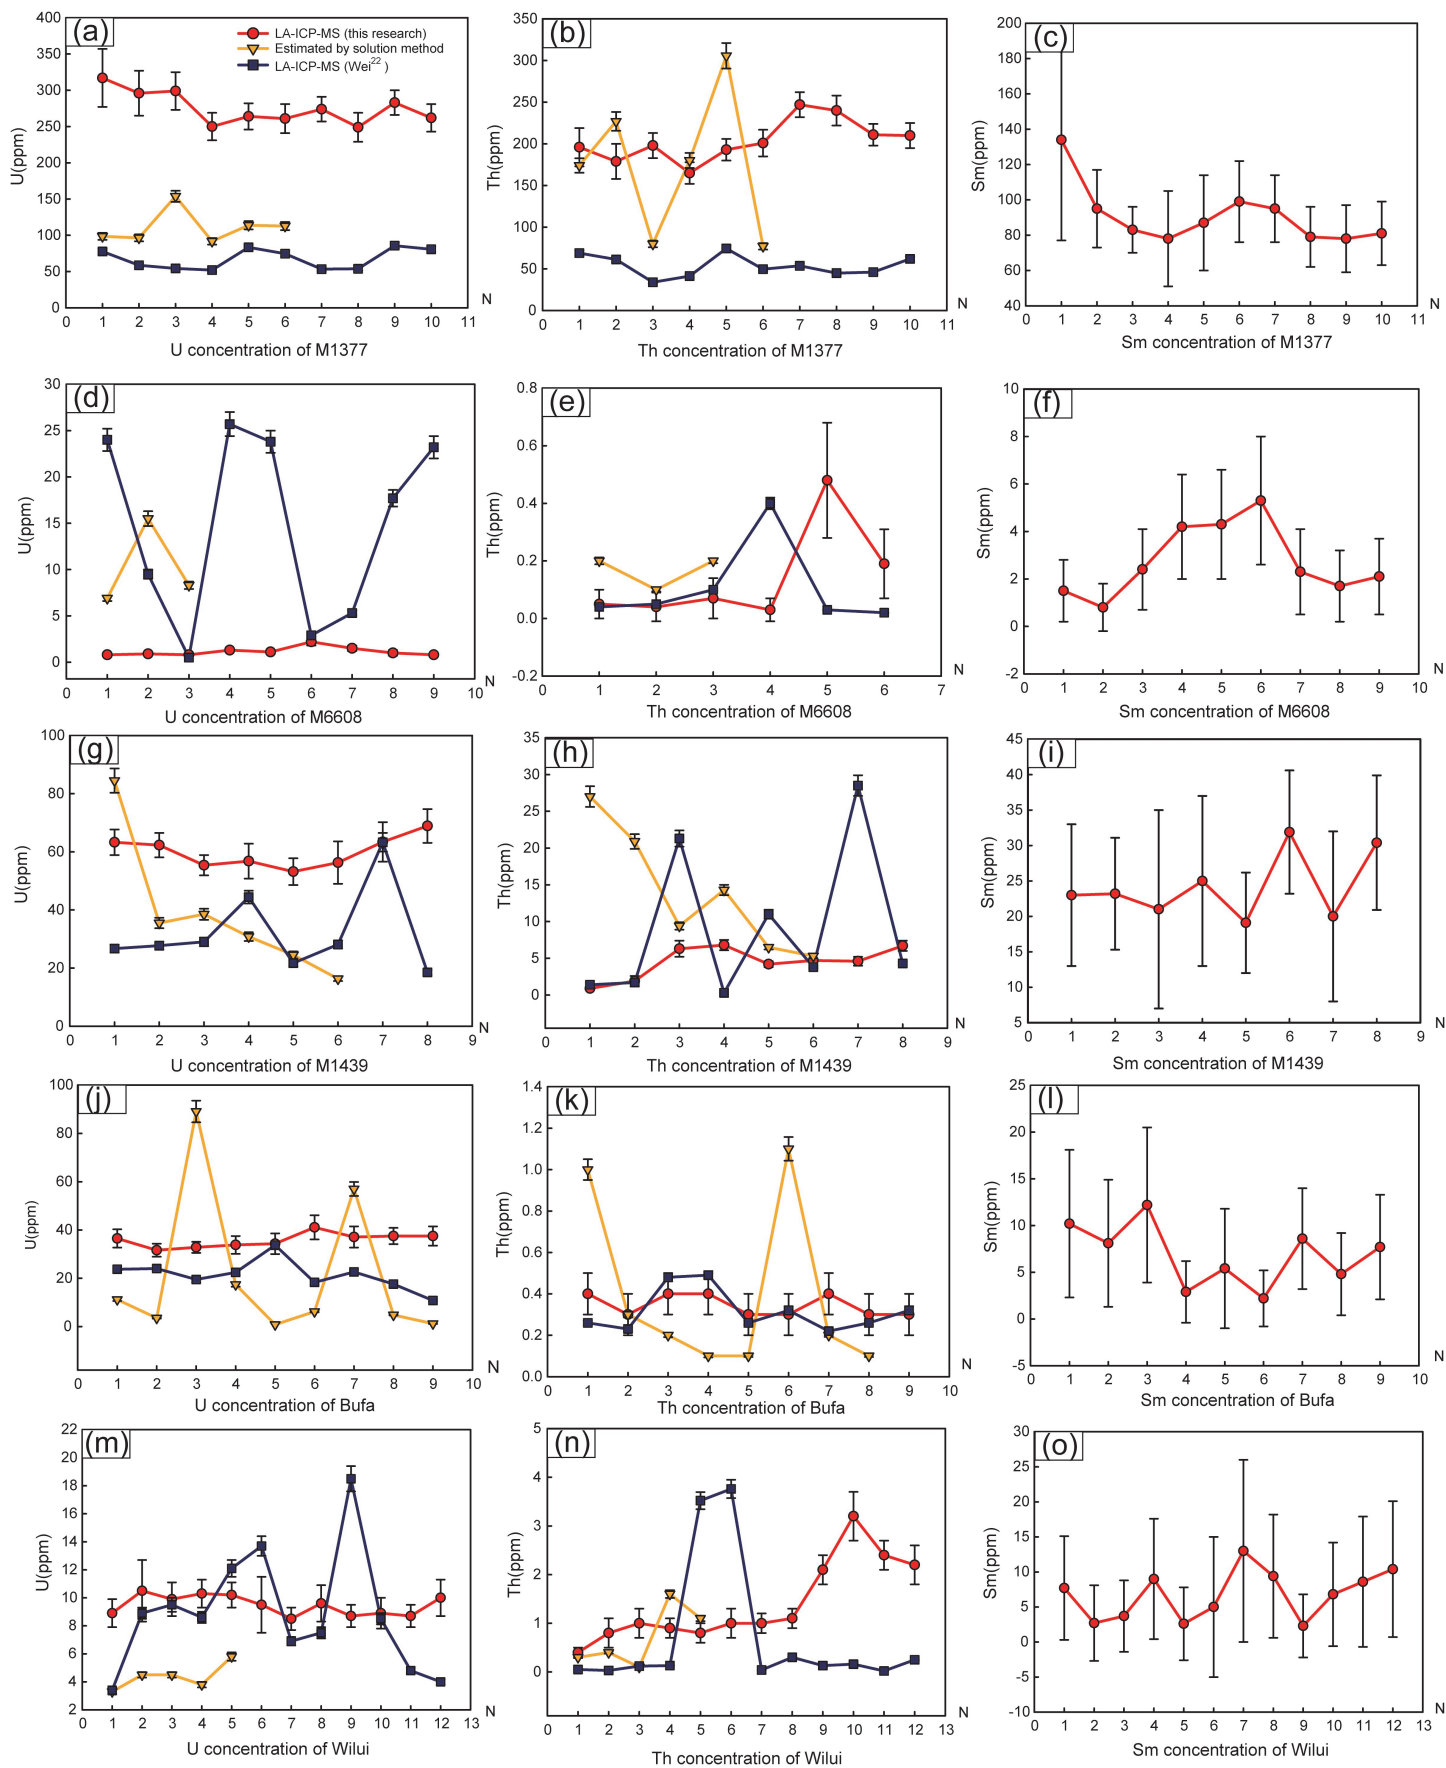

Supplement: d4ja00127c1.pdf [file d4ja00127c1.pdf]
